# Supplementary material for: Bimetallic tandem catalysis-enabled enantioselective cycloisomerization/carbonyl–ene reaction for construction of 5-oxazoylmethyl α-silyl alcohol
Source: Royal Society of Chemistry journal article supplement (doi:10.1039/d3sc01048a), 2023-01-01

# Supplementary information

## **Bimetallic tandem catalysis-enabled enantioselective cycloisomerization/carbonyl-ene reaction for construction of 5- oxazoylmethyl $\alpha$ -silyl alcohol**

Xinpeng Sang, Yuhao Mo, Shiya Li, Xiaohua Liu, Weidi Cao\* and Xiaoming Feng\*

Key Laboratory of Green Chemistry & Technology, Ministry of Education, College of Chemistry, Sichuan University, Chengdu 610064, China

\*E-mail: [wdcao@scu.edu.cn](mailto:wdcao@scu.edu.cn); [xmfeng@scu.edu.cn](mailto:xmfeng@scu.edu.cn);

### Table of Contents

|                                                                            |    |
|----------------------------------------------------------------------------|----|
| 1. General information.....                                                | 2  |
| 2. Synthesis of the substrates .....                                       | 2  |
| 3. General procedures for the catalytic asymmetric reaction .....          | 6  |
| 4. Scope limitation .....                                                  | 8  |
| 5. Optimization of the reaction conditions .....                           | 8  |
| 6. Gram-scale synthesis .....                                              | 13 |
| 7. Control experiments and mechanistic studies.....                        | 13 |
| 8. X-ray crystal structure .....                                           | 17 |
| 9. The analytical and spectral characterization data for the products..... | 19 |
| 10. References.....                                                        | 65 |

## 1. General information

<sup>1</sup>H NMR spectra were recorded at 400 MHz or 600 MHz. The chemical shifts were recorded in ppm relative to tetramethylsilane and with the solvent resonance as the internal standard. Data were reported as follows: chemical shift, multiplicity (s = singlet, d = doublet, t = triplet, q = quartet, dd = doublet of doublet, m = multiple), coupling constants (Hz), integration. <sup>13</sup>C NMR data were collected at 101 MHz with complete proton decoupling. <sup>19</sup>F NMR spectra were collected on commercial instruments (377 MHz or 565 MHz) with complete proton decoupling. Melting points (Mp) were determined using OptiMelt automated melting point system. Enantiomeric excesses (ee) were determined by chiral HPLC analysis by using the corresponding commercial chiralpak or chiralcel column as stated in the experimental procedures at 25 °C, and UPC<sup>2</sup> at 35 °C with UV detector at 254 nm or 210 nm. Optical rotations were reported as follows: [α]<sub>D</sub><sup>T</sup> (c: g/100 mL, in solvent). High resolution mass spectra (HRMS) analyses were recorded on a Thermo Scientific LTQ Orbitrap XL with positive ion mode and methanol were used to dissolve the sample. UV-vis absorbance spectra were recorded on SHIMADZU UV-2600 UV-Vis spectrophotometer in a 10.0 mm quartz cuvette. IR spectra were recorded on Pierkin Elmer 100 FT/IR spectrometer, and the wave numbers of the absorption peaks are given in cm<sup>-1</sup>. Solvents were dried and distilled prior to use according to the standard methods. Unless noted, other commercially available reagents were used without further purification. The chiral *N,N'*-dioxide ligands were synthesized by the same procedure in the literature<sup>1</sup>.

## 2. Synthesis of the substrates

### 2.1 General procedures for the preparation of silylglyoxylate A1-A12

Silylglyoxylate **A1**, **A3**, **A7-12** and were known compounds and synthesized according to the reported procedures<sup>2</sup>. Silylglyoxylate **A2**, **A4**, **A5**, **A6** were synthesized according to the following procedure:

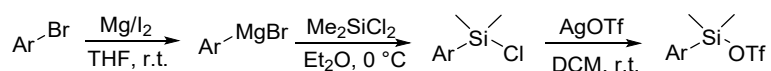

A solution of substituted bromobenzene (20 mmol, 1.0 equiv.) in THF (12 mL) was added slowly to a suspension of magnesium (20 mmol, 1.0 equiv.) in THF (8 mL) activated by I<sub>2</sub> (One grain) under N<sub>2</sub> atmosphere. The mixture was reacted at room temperature for 2 hours until the magnesium strips disappeared, and the reaction process would be violently exothermic. Then the mixture was cooled to 0 °C and added to a solution of Me<sub>2</sub>SiCl<sub>2</sub> in Et<sub>2</sub>O (5 mL), the mixture was stirred at r.t. for 24 h. The solvent was evaporated and added hexane, filtered, concentrated and purified by vacuum distillation. A solution of chlorodimethylarylsilane<sup>3</sup> (12 mmol, 1.2 equiv.) in CH<sub>2</sub>Cl<sub>2</sub> (10 mL) was added to a suspension of AgOTf (12 mmol, 1.2 equiv.) in CH<sub>2</sub>Cl<sub>2</sub> (3 mL). The resulting mixture was left stirring at room temperature in the dark for 24 h. The AgCl precipitate was removed by filtration and the solvent was removed in vacuo and used without purification<sup>4</sup>.

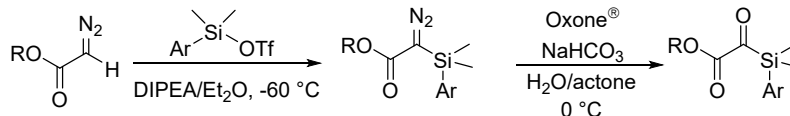

Under a nitrogen atmosphere, to a solution of diazoacetate<sup>5</sup> (10 mmol, 1.0 equiv.) and *i*Pr<sub>2</sub>NEt (14 mmol, 1.4 equiv.) was added Et<sub>2</sub>O (15 mL) under N<sub>2</sub>. This solution was cooled to -78 °C and ArMe<sub>2</sub>SiOTf (13 mmol, 1.3 equiv.) in DCM (10 mL) was added slowly via syringe over the course of 20 min. The resultant solution was stirred at -60 °C for 36 h and the ammonium salts were removed by filtration. The filtrate was concentrated in vacuo to afford the crude silyl diazoacetate. Oxone<sup>®</sup> (92 g, 150 mmol, 15.0 equiv.) was added in portions to a stirred solution of NaHCO<sub>3</sub> (50.4 g, 600 mmol, 60.0 equiv.) in H<sub>2</sub>O/acetone (300 ml, 1.5:1) at 0 °C. After 20 min, a solution of the crude silyl diazoacetate in CH<sub>2</sub>Cl<sub>2</sub> (40 mL) was added slowly over 30 min via syringe. Once addition was complete, the reaction was warmed to room temperature and stirring was continued for an additional 15 min (bright yellow solution). The organic phase was decanted into a separatory funnel and was washed with H<sub>2</sub>O and dried (Na<sub>2</sub>SO<sub>4</sub>). Concentration of the organic phase by rotary evaporation afforded the crude silyl glyoxylate which was purified by flash chromatography using the specified solvent system (PE/Et<sub>2</sub>O = 40 : 1).

#### cyclohexyl 2-(dimethyl(phenyl)silyl)-2-oxoacetate (A2)

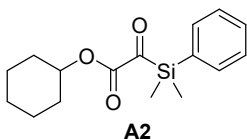

Bright yellow liquid; 14% yield.

<sup>1</sup>H NMR (400 MHz, CDCl<sub>3</sub>) δ 7.61 – 7.55 (m, 2H), 7.44 – 7.36 (m, 3H), 4.91 – 4.71 (m, 1H), 1.85 – 1.77 (m, 2H), 1.74 – 1.61 (m, 3H), 1.57 – 1.49 (m, 1H), 1.45 – 1.30 (m, 4H), 0.59 (s, 6H).

<sup>13</sup>C NMR (101 MHz, CDCl<sub>3</sub>) δ 161.4, 134.5, 133.0, 130.4, 128.3, 75.1, 31.5, 25.3, 23.9, -4.4.

HRMS (ESI+) *m/z* calcd for C<sub>16</sub>H<sub>24</sub>O<sub>3</sub>Si [M+H]<sup>+</sup>: 291.1411, found: 291.1419.

IR (neat): 2938, 1711, 1252, 1116, 1037, 1009, 833, 789, 699 cm<sup>-1</sup>.

#### Tert-butyl 2-(2-dimethylphenyl) dimethylsilyl)-2-oxoacetate (A4)

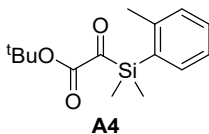

Bright yellow liquid; 17% yield.

<sup>1</sup>H NMR (400 MHz, CDCl<sub>3</sub>) δ 7.53 – 7.46 (m, 1H), 7.37 – 7.29 (m, 1H), 7.25 – 7.15 (m, 2H), 2.30 (s, 3H), 1.32 (s, 9H), 0.58 (s, 6H).

<sup>13</sup>C NMR (101 MHz, CDCl<sub>3</sub>) δ 161.5, 143.9, 135.1, 132.6, 130.5, 130.1, 125.5, 83.7, 27.8, 23.1, -3.4.

**HRMS** (ESI+)  $m/z$  calcd for  $C_{15}H_{22}O_3Si$   $[M+H]^+$ : 279.1411, found: 279.1410.

**IR** (neat): 2963, 1711, 1371, 1257, 1024, 792  $cm^{-1}$ .

**Tert-butyl 2-(3-methoxyphenyl) dimethylsilyl-2-oxoacetate (A5)**

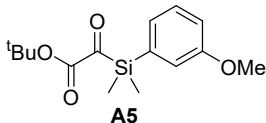

Bright yellow liquid; 20% yield.

**$^1H$  NMR** (400 MHz,  $CDCl_3$ )  $\delta$  7.36 – 7.28 (m, 1H), 7.16 – 7.11 (m, 1H), 7.10 – 7.06 (m, 1H), 6.98 – 6.91 (m, 1H), 3.8 (s, 3H), 1.4 (s, 9H), 0.6 (s, 6H).

**$^{13}C$  NMR** (101 MHz,  $CDCl_3$ )  $\delta$  161.6, 159.3, 134.7, 129.5, 126.7, 119.8, 115.7, 83.8, 55.3, 28.0, -4.4.

**HRMS** (ESI+)  $m/z$  calcd for  $C_{15}H_{22}O_4Si$   $[M+H]^+$ : 295.1360, found: 295.1356.

**IR** (neat): 2978, 1709, 1369, 1283, 1245, 1041, 782  $cm^{-1}$ .

**Tert-butyl 2-(3,5-dimethylphenyl) dimethylsilyl-2-oxoacetate (A6)**

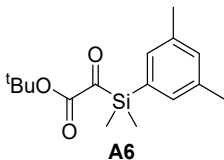

Bright yellow liquid; 23% yield.

**$^1H$  NMR** (400 MHz,  $CDCl_3$ )  $\delta$  7.19 – 7.12 (m, 2H), 7.08 – 7.02 (m, 1H), 2.33 – 2.29 (m, 6H), 1.43 (s, 9H), 0.56 (s, 6H).

**$^{13}C$  NMR** (101 MHz,  $CDCl_3$ )  $\delta$  161.8, 137.6, 132.8, 132.1, 132.1, 83.7, 28.0, 21.5, -4.3.

**HRMS** (ESI+)  $m/z$  calcd for  $C_{16}H_{24}O_3Si$   $[M+H]^+$ : 293.1567, found: 293.1569.

**IR** (neat): 2977, 1739, 1369, 1247, 1038, 787  $cm^{-1}$ .

## 2.2 General procedures for the preparation of propargyl amides

Propargyl amides **B1-B10**<sup>6a-c</sup>, **B11**<sup>6g</sup>, **B12-B14**<sup>6a-c</sup>, **B15-B22**<sup>6f</sup>, **B23**<sup>6e</sup>, **B24**<sup>6d</sup>, **B28**<sup>6h</sup>, **B29**<sup>6c</sup>, **B30**<sup>6d</sup>, **B31**<sup>6d</sup>, **B32**<sup>6h</sup> were prepared according to the reported literature.

**General procedure for propargyl amide synthesis via EDC coupling:** To a solution of the appropriate carboxylic acid (5.0 mmol, 1.0 equiv.) in  $CH_2Cl_2$  (15 mL) was added EDC hydrochloride (1.15 g, 6.0 mmol, 1.2 equiv.) and stirred for 2 min, then HOBt (0.74 g, 5.5 mmol, 1.1 equiv.) was added and stirred for a further 2 min. Propargylamine (0.35 mL, 5.5 mmol, 1.1 equiv.) was then added and the mixture stirred at r.t. for 24 h (monitored by TLC). The mixture was diluted with  $CH_2Cl_2$  (10 mL), washed with saturated aqueous  $Na_2CO_3$  solution (20 mL), 1 N aqueous HCl solution (20 mL), saturated NaCl solution in sequence and dried by anhydrous  $Na_2SO_4$ . The solvent was evaporated under reduced

pressure after filtration. The residue was purified by column chromatography on silica gel (petroleum ether/ethyl acetate) to give pure product.

#### 4-(*N,N*-dipropylsulfamoyl)-*N*-(prop-2-yn-1-yl) benzamide (B25)

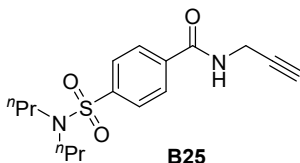

51% yield, white solid; mp: 90-95 °C.

**<sup>1</sup>H NMR** (400 MHz, CDCl<sub>3</sub>) δ 7.95 – 7.84 (m, 2H), 7.78 – 7.67 (m, 2H), 7.51 (s, 1H), 4.15 (dd, *J* = 5.2, 2.4 Hz, 2H), 3.08 – 2.91 (m, 4H), 2.20 (t, *J* = 2.4 Hz, 1H), 1.46 (m, 4H), 0.78 (t, *J* = 7.2 Hz, 6H).

**<sup>13</sup>C NMR** (101 MHz, CDCl<sub>3</sub>) δ 166.1, 142.7, 137.3, 128.1, 127.1, 79.3, 71.6, 49.9, 29.7, 21.9, 11.1.

**HRMS** (ESI+) *m/z* calcd for C<sub>16</sub>H<sub>22</sub>N<sub>2</sub>O<sub>3</sub>S [M+H]<sup>+</sup>: 323.1424, found: 323.1423.

**IR** (neat): 3289, 2967, 2876, 1649, 1533, 1486, 1465, 1334, 1146, 1089, 990, 856, 797, 740, 603 cm<sup>-1</sup>.

#### 3-(5-(2-fluorophenyl)-1,2,4-oxadiazol-3-yl)-*N*-(prop-2-yn-1-yl)benzamide (B26)

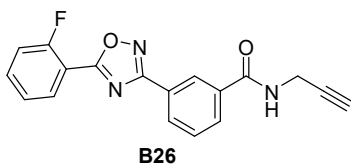

67% yield, white solid; mp: 169-173 °C.

**<sup>1</sup>H NMR** (400 MHz, DMSO-*d*<sub>6</sub>) δ 9.26 (t, *J* = 5.6 Hz, 1H), 8.59 (m, 1H), 8.32 – 8.18 (m, 2H), 8.16 – 8.07 (m, 1H), 7.86 – 7.77 (m, 1H), 7.73 (t, *J* = 7.6 Hz, 1H), 7.62 – 7.44 (m, 2H), 4.22 – 4.11 (m, 2H), 3.42 (s, 1H), 3.21 (s, 1H).

**<sup>13</sup>C NMR** (101 MHz, DMSO-*d*<sub>6</sub>) δ 173.1 (d, *J* = 4.3 Hz), 168.0, 165.6, 161.7, 159.1, 136.2 (d, *J* = 8.9 Hz), 135.2, 131.3, 130.8, 130.3, 130.0, 126.6 (d, *J* = 8.8 Hz), 125.9 (d, *J* = 3.4 Hz), 117.7 (d, *J* = 20.6 Hz), 112.1 (d, *J* = 11.4 Hz), 81.6, 73.5, 29.1.

**<sup>19</sup>F NMR** (377 MHz, DMSO-*d*<sub>6</sub>) δ -109.31.

**HRMS** (ESI+) *m/z* calcd for C<sub>18</sub>H<sub>12</sub>FN<sub>3</sub>O<sub>2</sub> [M+H]<sup>+</sup>: 322.0986, found: 322.0982.

**IR** (neat): 3300, 1647, 1621, 1591, 1536, 1517, 1468, 1369, 1348, 1294, 1268, 1227, 1165, 1110, 920, 824, 749, 722, 682 cm<sup>-1</sup>.

#### 3-methyl-4-oxo-2-phenyl-*N*-(prop-2-yn-1-yl)-4H-chromene-8-carboxamide (B27)

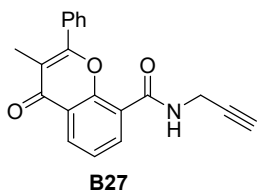

35% yield, white solid; mp: 200-204 °C.

<sup>1</sup>H NMR (400 MHz, CDCl<sub>3</sub>) δ 8.45 (dd, *J* = 7.6, 2.0 Hz, 1H), 8.38 (dd, *J* = 7.6, 1.6 Hz, 1H), 7.75 – 7.64 (m, 2H), 7.62 – 7.50 (m, 4H), 7.47 (t, *J* = 8.0 Hz, 1H), 4.25 (dd, *J* = 4.8, 2.4 Hz, 2H), 2.21 (t, *J* = 2.4 Hz, 1H), 2.19 (s, 3H).

<sup>13</sup>C NMR (101 MHz, CDCl<sub>3</sub>) δ 178.0, 163.1, 160.1, 153.3, 136.4, 132.6, 130.7, 130.1, 129.0, 128.9, 124.8, 122.7, 122.1, 118.1, 79.0, 72.1, 29.9, 11.7.

HRMS (ESI+) *m/z* calcd for C<sub>20</sub>H<sub>15</sub>NO<sub>3</sub> [M+H]<sup>+</sup> : 318.1125, found: 318.1119.

IR (neat): 3239, 2360, 1626, 1540, 1478, 1439, 1389, 1301, 1234, 1132, 1076, 761, 697 cm<sup>-1</sup>.

### 5-(2,5-dimethylphenoxy)-2,2-dimethyl-N-(prop-2-yn-1-yl)pentanamide (B33)

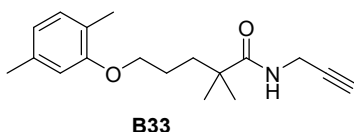

64% yield, white solid; mp: 55-60 °C.

<sup>1</sup>H NMR (400 MHz, CDCl<sub>3</sub>) δ 7.01 (d, *J* = 7.6 Hz, 1H), 6.69 – 6.64 (m, 1H), 6.63 – 6.59 (m, 1H), 5.91 (s, 1H), 4.05 (dd, *J* = 5.2, 2.4 Hz, 2H), 3.92 (t, *J* = 5.6 Hz, 2H), 2.31 (s, 3H), 2.23 (t, *J* = 2.8 Hz, 1H), 2.19 (s, 3H), 1.80 – 1.67 (m, 4H), 1.24 (s, 6H).

<sup>13</sup>C NMR (101 MHz, CDCl<sub>3</sub>) δ 177.2, 156.9, 136.5, 130.3, 123.5, 120.8, 112.1, 71.6, 67.9, 41.9, 37.5, 29.4, 25.4, 25.1, 21.4, 15.9.

HRMS (ESI+) *m/z* calcd for C<sub>18</sub>H<sub>25</sub>NO<sub>2</sub> [M+H]<sup>+</sup>:288.1958, found: 288.1956.

IR (neat): 3307, 2951, 1643, 1583, 1509, 1475, 1415, 1390, 1262, 1156, 1129, 1040, 804, 750, 651, 448 cm<sup>-1</sup>.

## 3. General procedures for the catalytic asymmetric reaction

### 3.1 General procedures for the preparation of racemic products

Representative experimental procedure for the reaction of silyl glyoxylate **A** and propargyl amides **B**.

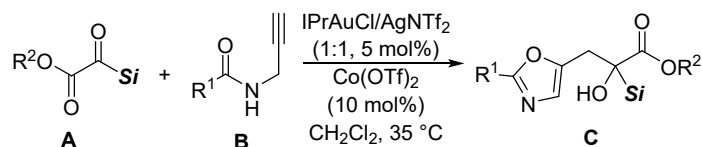

**Procedure A:** IPrAuCl (3.1 mg, 5 mol%), AgNTf<sub>2</sub> (1.9 mg, 5 mol%), Co(OTf)<sub>2</sub> (3.5 mg, 10 mol%), silylglyoxylate **A** (0.10 mmol) and propargyl amides **B** (0.10 mmol) are successively added into a dry catalytic tube. CH<sub>2</sub>Cl<sub>2</sub> (1 mL) was added and the mixture was stirred at 35 °C until the solution becomes to be colorless. After the silylglyoxylate **A** was fully consumed (detected by TLC), the residue was purified by column chromatography on silica gel to afford the product **C**.

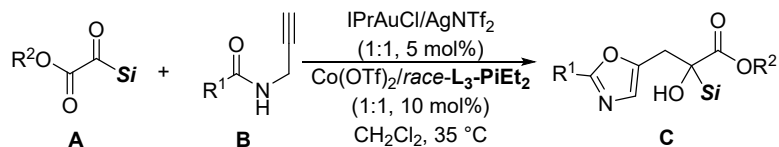

**Procedure B:** IPrAuCl (3.1 mg, 5 mol%), AgNTf<sub>2</sub> (1.9 mg, 5 mol%), Co(OTf)<sub>2</sub> (3.5 mg, 10 mol%), *race*-L<sub>3</sub>-PiEt<sub>2</sub> (5.9 mg, 10 mol%), silylglyoxylate **A** (0.10 mmol) and propargyl amides **B** (0.10 mmol) are successively added into a dry catalytic tube. CH<sub>2</sub>Cl<sub>2</sub> (1 mL) was added and the mixture was stirred at 35 °C until the solution becomes to be colorless. After the silylglyoxylate **A** was fully consumed (detected by TLC), the residue was purified by column chromatography on silica gel to afford the product **C**.

The racemic products **C25** were prepared with procedure **B**.

### 3.2 General procedures for the catalytic asymmetric reaction

Representative experimental procedure for the reaction of silylglyoxylate **A1** and propargyl amides **B1**.

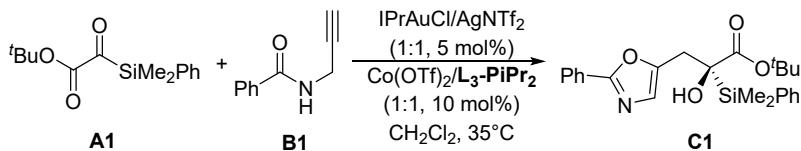

**Procedure for the synthesis of the adduct C:** Under an atmosphere of nitrogen, IPrAuCl (3.1 mg, 5 mol%), AgNTf<sub>2</sub> (1.9 mg, 5 mol%), Co(OTf)<sub>2</sub> (3.5 mg, 10 mol%), L<sub>3</sub>-PiPr<sub>2</sub> (6.5 mg, 10 mol%), silylglyoxylate **A1** (0.10 mmol) and propargyl amides **B1** (0.12 mmol) were stirred in DCM (1 mL) at 35 °C. The mixture was stirred until **A1** disappeared (bright orange faded, or TLC monitor). the residue was purified by column chromatography (petroleum ether:ethyl acetate: = 8.5 :1) on silica gel to afford the product **C1**.

## 4. Scope limitation

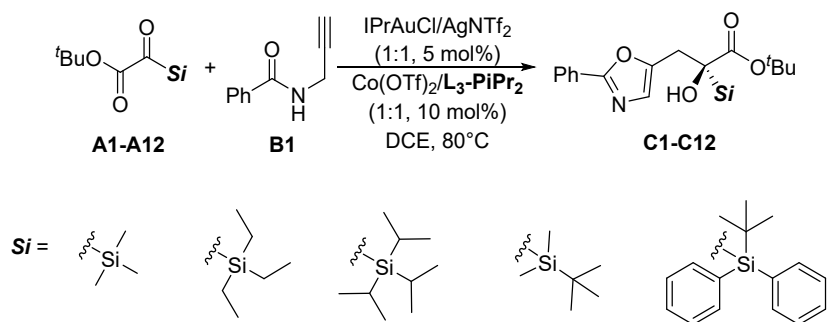

**Figure S1.** Unsuccessful substrate scope of silyl glyoxylate.

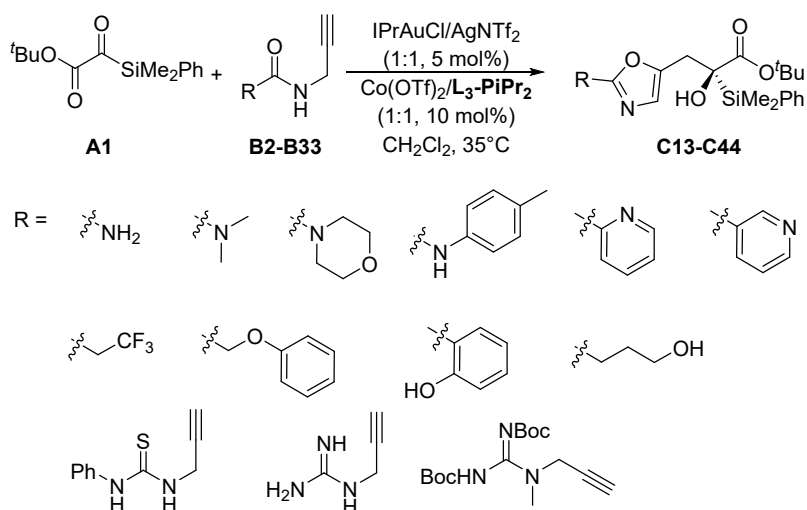

**Figure S2.** Unsuccessful substrate scope of *N*-propargylamides.

## 5. Optimization of the reaction conditions

**Table S1.** The screening of metal salts

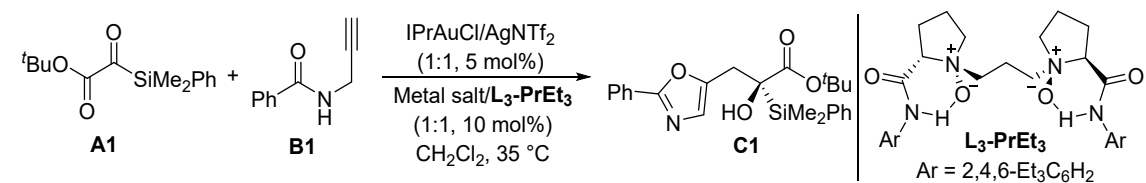

| Entry <sup>a</sup> | Metal salts          | C1 yield (%) <sup>b</sup> | C1 ee (%) <sup>c</sup> |
|--------------------|----------------------|---------------------------|------------------------|
| 1                  | Mg(OTf) <sub>2</sub> | 50                        | 66                     |
| 2                  | Sc(OTf) <sub>3</sub> | 49                        | 32                     |
| 3                  | Y(OTf) <sub>3</sub>  | 65                        | 45                     |
| 4                  | La(OTf) <sub>3</sub> | 64                        | 47                     |



|    |                      |    |    |
|----|----------------------|----|----|
| 5  | Al(OTf) <sub>3</sub> | 26 | 2  |
| 6  | In(OTf) <sub>3</sub> | 18 | 10 |
| 7  | Fe(OTf) <sub>2</sub> | 25 | 39 |
| 8  | Zn(OTf) <sub>2</sub> | 65 | 96 |
| 9  | Ni(OTf) <sub>2</sub> | 74 | 98 |
| 10 | Co(OTf) <sub>2</sub> | 84 | 99 |

<sup>a</sup> Unless otherwise noted, all reactions were performed with metal salt/**L**<sub>3</sub>-**PrEt**<sub>3</sub> (1:1, 10 mol%), IPrAuCl/AgNTf<sub>2</sub> (1:1, 5 mol%), **A1** (0.10 mmol), **B1** (0.12 mmol) in CH<sub>2</sub>Cl<sub>2</sub> (1.0 mL) under N<sub>2</sub> atmosphere at 35 °C for 5 h. <sup>b</sup> Yield of isolated product. <sup>c</sup> ee values were determined by UPC<sup>2</sup> on a chiral stationary phase. N.D. = no detected.

**Table S2.** The screening of counterbalance ions in cobalt metal salts

| Entry <sup>a</sup> | Metal salts                                           | C1 yield (%) <sup>b</sup> | C1 ee (%) <sup>c</sup> |
|--------------------|-------------------------------------------------------|---------------------------|------------------------|
| 1                  | Co(OTf) <sub>2</sub>                                  | 84                        | 99                     |
| 2                  | Co(NTf <sub>2</sub> ) <sub>2</sub>                    | 82                        | 99                     |
| 3                  | Co(BF <sub>4</sub> ) <sub>2</sub> ·6H <sub>2</sub> O  | 79                        | 98                     |
| 4                  | Co(ClO <sub>4</sub> ) <sub>2</sub> ·6H <sub>2</sub> O | 68                        | 97                     |
| 5                  | Co(acac) <sub>2</sub>                                 | N.D.                      | -                      |
| 6                  | CoCl <sub>2</sub>                                     | N.D.                      | -                      |

<sup>a</sup> Unless otherwise noted, all reactions were performed with metal salt/**L**<sub>3</sub>-**PrEt**<sub>3</sub> (1:1, 10 mol%), IPrAuCl/AgNTf<sub>2</sub> (1:1, 5 mol%), **A1** (0.10 mmol), **B1** (0.12 mmol) in CH<sub>2</sub>Cl<sub>2</sub> (1.0 mL) under N<sub>2</sub> atmosphere at 35 °C for 5 h. <sup>b</sup> Yield of isolated product. <sup>c</sup> ee values were determined by UPC<sup>2</sup> on a chiral stationary phase. N.D. = no detected.

**Table S3.** The screening of solvent

| Entry <sup>a</sup> | Solvent                              | Yield (%) <sup>b</sup> | ee (%) <sup>c</sup> |
|--------------------|--------------------------------------|------------------------|---------------------|
| 1                  | THF                                  | 19                     | 72                  |
| 2                  | CH <sub>3</sub> CN                   | 44                     | 76                  |
| 3                  | Toluene                              | 31                     | 84                  |
| 4                  | EA                                   | 47                     | 93                  |
| 5                  | Et <sub>2</sub> O                    | 56                     | 93                  |
| 6                  | CHCl <sub>3</sub>                    | 73                     | 99                  |
| 7                  | CH <sub>2</sub> ClCH <sub>2</sub> Cl | 74                     | 99                  |

<sup>a</sup> Unless otherwise noted, all reactions were performed with Co(OTf)<sub>2</sub>/L<sub>3</sub>-PrEt<sub>3</sub> (1:1, 10 mol%), IPrAuCl/AgNTf<sub>2</sub> (1:1, 5 mol%), **A1** (0.10 mmol), **B1** (0.12 mmol) in solvent (1.0 mL) under N<sub>2</sub> atmosphere at 35 °C for 5 h. <sup>b</sup> Yield of isolated product. <sup>c</sup> ee values were determined by UPC<sup>2</sup> on a chiral stationary phase.

**Table S4.** The screening of ligands

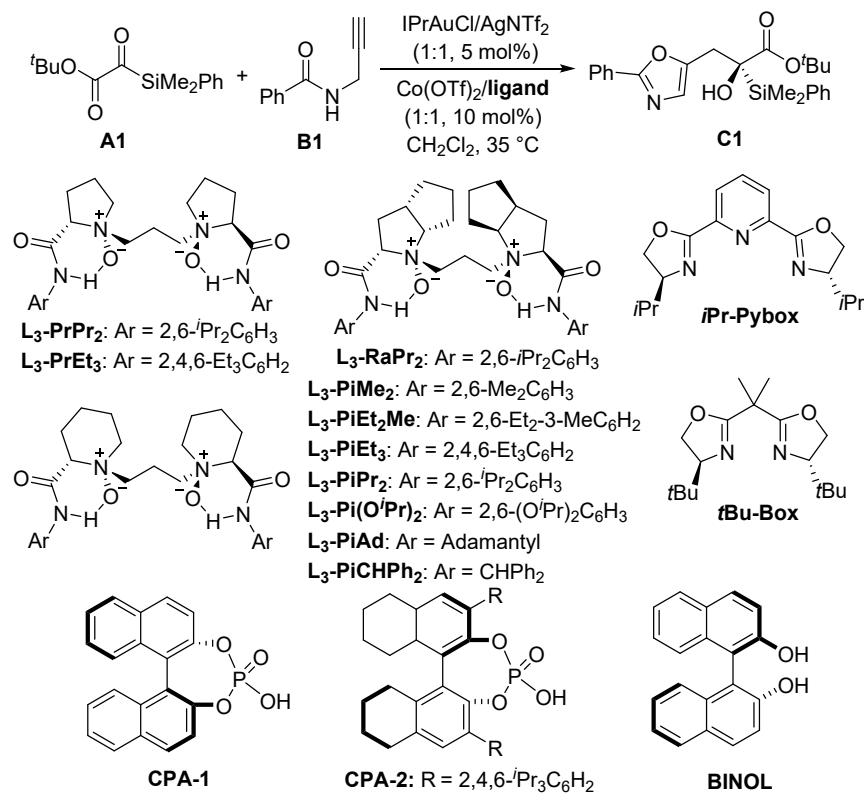

| Entry <sup>a</sup> | Ligand                                             | Yield (%) <sup>b</sup> | ee (%) <sup>c</sup> |
|--------------------|----------------------------------------------------|------------------------|---------------------|
| 1                  | L <sub>3</sub> -PrPr <sub>2</sub>                  | 73                     | 97                  |
| 2                  | L <sub>3</sub> -PrEt <sub>3</sub>                  | 84                     | 99                  |
| 3                  | L <sub>3</sub> -RaPr <sub>2</sub>                  | 68                     | 98                  |
| 4                  | L <sub>3</sub> -PiPr <sub>2</sub>                  | 88                     | 99                  |
| 5                  | L <sub>3</sub> -PiAd                               | 13                     | 20                  |
| 6                  | L <sub>3</sub> -PiCHPh <sub>2</sub>                | 38                     | 83                  |
| 7                  | L <sub>3</sub> -PiMe <sub>2</sub>                  | 74                     | 99                  |
| 8                  | L <sub>3</sub> -PiEt <sub>2</sub> Me               | 77                     | 99                  |
| 9                  | L <sub>3</sub> -PiEt <sub>3</sub>                  | 85                     | 99                  |
| 9                  | L <sub>3</sub> -Pi(O <sup>i</sup> Pr) <sub>2</sub> | 64                     | 96                  |
| 10 <sup>d</sup>    | CPA-1                                              | N.D.                   | -                   |
| 11 <sup>d</sup>    | CPA-2                                              | N.D.                   | -                   |
| 12                 | tBu-Box                                            | 39                     | 4                   |
| 13                 | iPr-PyBox                                          | 14                     | 0                   |

|    |              |    |   |
|----|--------------|----|---|
| 14 | <b>BINOL</b> | 56 | 0 |
|----|--------------|----|---|

<sup>a</sup> Unless otherwise noted, all reactions were performed with Co(OTf)<sub>2</sub>/**Ligand** (1:1, 10 mol%), IPrAuCl/AgNTf<sub>2</sub> (1:1, 5 mol%), **A1** (0.10 mmol), **B1** (0.12 mmol) in CH<sub>2</sub>Cl<sub>2</sub> (1.0 mL) under N<sub>2</sub> atmosphere at 35 °C for 5 h. <sup>b</sup> Yield of isolated product. <sup>c</sup> ee values were determined by UPC<sup>2</sup> on a chiral stationary phase. <sup>d</sup> without Co(OTf)<sub>2</sub>.

**Table S5.** The screening of additives

| Entry <sup>a</sup> | Additives                                | Yield (%) <sup>b</sup> | ee (%) <sup>c</sup> |
|--------------------|------------------------------------------|------------------------|---------------------|
| 1                  | -                                        | 88                     | 99                  |
| 2                  | 3 Å M.S. (20 mg)                         | 75                     | 99                  |
| 3                  | 4 Å M.S. (20 mg)                         | 84                     | 99                  |
| 4                  | 5 Å M.S. (20 mg)                         | 83                     | 99                  |
| 5                  | Et <sub>3</sub> N (30 mol%)              | N.D.                   | -                   |
| 6                  | K <sub>2</sub> CO <sub>3</sub> (10 mol%) | N.D.                   | -                   |
| 7                  | PhCO <sub>2</sub> H (10 mol%)            | 83                     | 99                  |
| 8                  | NaBARF <sub>4</sub> (10 mol%)            | 83                     | 98                  |

<sup>a</sup> Unless otherwise noted, all reactions were performed with Co(OTf)<sub>2</sub>/**L<sub>3</sub>-PiPr<sub>2</sub>** (1:1, 10 mol%), IPrAuCl/AgNTf<sub>2</sub> (1:1, 5 mol%), **A1** (0.10 mmol), **B1** (0.12 mmol) and additives in CH<sub>2</sub>Cl<sub>2</sub> (1.0 mL) under N<sub>2</sub> atmosphere at 35 °C for 5 h. <sup>b</sup> Yield of isolated product. <sup>c</sup> ee values were determined by UPC<sup>2</sup> on a chiral stationary phase.

**Table S6.** The screening of the ratio of substrates

| Entry <sup>a</sup> | <b>B1/A1</b> | Yield (%) <sup>b</sup> | ee (%) <sup>c</sup> |
|--------------------|--------------|------------------------|---------------------|
| 1                  | 3.0          | 78                     | 99                  |
| 2                  | 2.0          | 83                     | 99                  |
| 3                  | 1.5          | 86                     | 99                  |
| 4                  | 1.2          | 88                     | 99                  |
| 5                  | 1.0          | 80                     | 99                  |

<sup>a</sup> Unless otherwise noted, all reactions were performed with Co(OTf)<sub>2</sub>/**L<sub>3</sub>-PiPr<sub>2</sub>** (1:1, 10 mol%), IPrAuCl/AgNTf<sub>2</sub> (1:1, 5 mol%), **A1** (0.10 mmol), **B1** (x mmol) in CH<sub>2</sub>Cl<sub>2</sub> (1.0 mL) under N<sub>2</sub> atmosphere at 35 °C for 5 h. <sup>b</sup> Yield of isolated product. <sup>c</sup> ee values were determined by UPC<sup>2</sup> on a chiral stationary phase.

**Table S7.** The screening of temperature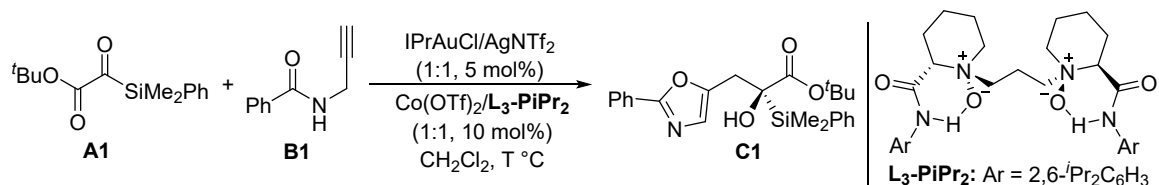

| Entry <sup>a</sup> | Temperature (°C) | Yield (%) <sup>b</sup> | ee (%) <sup>c</sup> |
|--------------------|------------------|------------------------|---------------------|
| 1                  | 0                | 26                     | 99                  |
| 2                  | 10               | 51                     | 99                  |
| 3                  | 20               | 74                     | 99                  |
| 4                  | 35               | 88                     | 99                  |

<sup>a</sup> Unless otherwise noted, all reactions were performed with  $\text{Co(OTf)}_2/\text{L}_3\text{-PiPr}_2$  (1:1, 10 mol%),  $\text{IPrAuCl/AgNTf}_2$  (1:1, 5 mol%), **A1** (0.10 mmol), **B1** (0.12 mmol) in  $\text{CH}_2\text{Cl}_2$  (1.0 mL) under  $\text{N}_2$  atmosphere at  $T$  °C for 5 h. <sup>b</sup> Yield of isolated product. <sup>c</sup> ee values were determined by UPC<sup>2</sup> on a chiral stationary phase.

**Table S8.** The screening of  $\pi$ -acid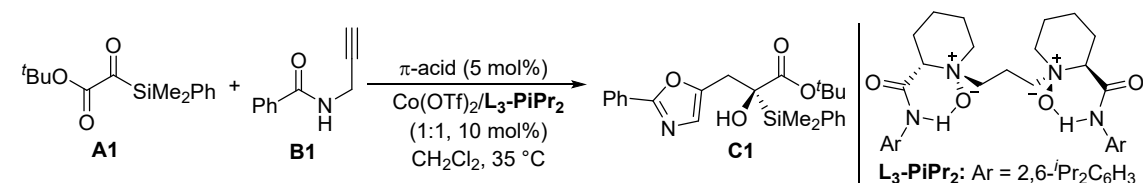

| Entry <sup>a</sup> | $\pi\text{-acid}$                                     | Yield (%) <sup>b</sup> | ee (%) <sup>c</sup> |
|--------------------|-------------------------------------------------------|------------------------|---------------------|
| 1                  | $\text{AuCl}\cdot\text{PPh}_3$                        | 20                     | 99                  |
| 2                  | $\text{IPrAuCl}$                                      | 48                     | 99                  |
| 3                  | $\text{AuCl}_3$                                       | 61                     | 98                  |
| 4                  | $\text{AuCl}(\text{CH}_3\text{SCH}_3)/\text{AgNTf}_2$ | 8                      | 99                  |
| 5                  | $\text{AuCl}\cdot\text{PPh}_3/\text{AgNTf}_2$         | 84                     | 99                  |
| 6                  | $\text{Me}_4\text{tBuXPhOSAuCl}/\text{AgNTf}_2$       | 86                     | 99                  |
| 7                  | $\text{IPrAuCl}/\text{AgNTf}_2$                       | 88                     | 99                  |
| 8                  | $\text{IPrAuCl}/\text{AgNO}_3$                        | 42                     | 92                  |
| 9                  | $\text{IPrAuCl}/\text{AgOAc}$                         | 73                     | 99                  |
| 10                 | $\text{IPrAuCl}/\text{AgBF}_4$                        | 73                     | 99                  |
| 11                 | $\text{IPrAuCl}/\text{AgOTf}$                         | 84                     | 99                  |
| 12                 | Cyclohexyl JohnPhos $\text{AuNTf}_2$                  | 63                     | 99                  |

<sup>a</sup> Unless otherwise noted, all reactions were performed with  $\text{Co(OTf)}_2/\text{L}_3\text{-PiPr}_2$  (1:1, 10 mol%),  $\pi\text{-acid}$  (5 mol%), **A1** (0.10 mmol), **B1** (0.12 mmol) in  $\text{CH}_2\text{Cl}_2$  (1.0 mL) under  $\text{N}_2$  atmosphere at 35 °C for 5 h. <sup>b</sup> Yield of isolated product. <sup>c</sup> ee values were determined by UPC<sup>2</sup> on a chiral stationary phase.

**Table S9.** Screening of the the amount of the **L<sub>3</sub>-PiPr<sub>2</sub>**/Co(OTf)<sub>2</sub>
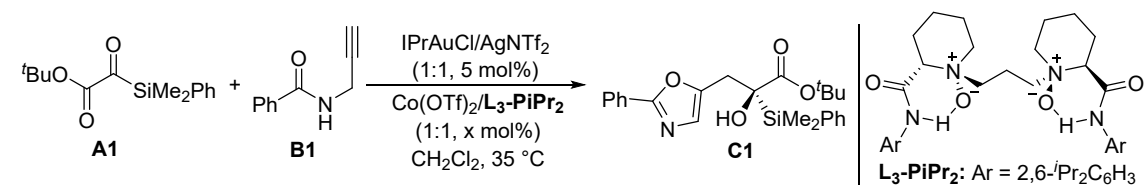

| Entry <sup>a</sup> | x    | Reaction time (h) | Yield (%) <sup>b</sup> | ee (%) <sup>c</sup> |
|--------------------|------|-------------------|------------------------|---------------------|
| 1                  | 1.0  | 18                | 75                     | 90                  |
| 2                  | 2.0  | 18                | 77                     | 93                  |
| 3                  | 5.0  | 8                 | 81                     | 99                  |
| 4                  | 10.0 | 5                 | 88                     | 99                  |

<sup>a</sup>Unless otherwise noted, all reactions were performed with Co(OTf)<sub>2</sub>/**L<sub>3</sub>-PiPr<sub>2</sub>** (1:1, x mol%), IPrAuCl/AgNTf<sub>2</sub> (1:1, 5 mol%), **A1** (0.10 mmol), **B1** (0.12 mmol) in CH<sub>2</sub>Cl<sub>2</sub> (1.0 mL) under N<sub>2</sub> atmosphere at 35 °C for 5 h. <sup>b</sup>Yield of isolated product. <sup>c</sup> ee values were determined by UPC<sup>2</sup> on a chiral stationary phase.

## 6. Gram-scale synthesis

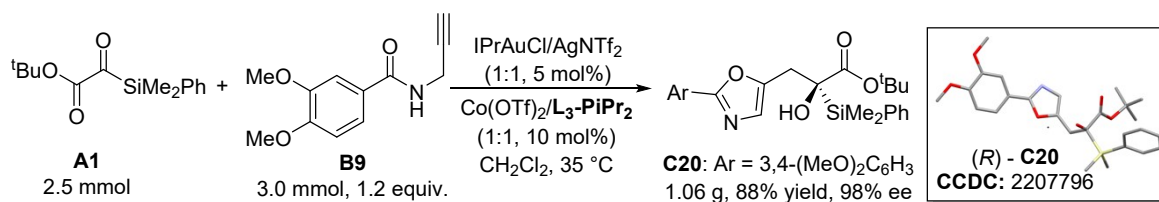

A 100 mL of dry round-bottom flask was charged with the IPrAuCl (77.6 mg, 5 mol%), AgNTf<sub>2</sub> (48.5 mg, 5 mol%), Co(OTf)<sub>2</sub> (89.3 mg, 10 mol%), *N,N'*-dioxide ligand **L<sub>3</sub>-PiPr<sub>2</sub>** (162.5 mg, 10 mol%) and silyl glyoxylate **A1** (660.0 mg, 2.50 mmol, 1.0 equiv.) under nitrogen atmosphere. DCM (25 mL) was added and the mixture were stirred at 35 °C for 5 h. Then, **B9** (657.0 mg, 3.0 mmol, 1.2 equiv.) was added. The mixture was stirred at 35 °C for 15 h (detection by TLC). The residue was purified by column chromatography (petroleum ether: ethyl acetate: = 4 :1) on silica gel to afford the desired product **C20** in 88% yield (1.06 g) with 98% ee as a white solid.

## 7. Control experiments and mechanistic studies

### 7.1 Control experiments

**Table S10.** Control experiments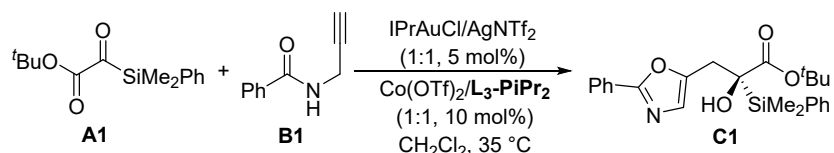

| Entry <sup>a</sup> | variation from the standard conditions                                                 | Yield (%) <sup>b</sup> | ee (%) <sup>c</sup> |
|--------------------|----------------------------------------------------------------------------------------|------------------------|---------------------|
| 1                  | -                                                                                      | 88                     | 99                  |
| 2                  | No Co(OTf) <sub>2</sub> /L <sub>3</sub> -PiPr <sub>2</sub>                             | 7                      | 0                   |
| 3                  | No AgNTf <sub>2</sub>                                                                  | 48                     | 99                  |
| 4                  | No IPrAuCl                                                                             | 3                      | 99                  |
| 5                  | No Co(OTf) <sub>2</sub>                                                                | trace                  | 0                   |
| 6                  | No L <sub>3</sub> -PiPr <sub>2</sub>                                                   | 70                     | 0                   |
| 7                  | No IPrAuCl/AgNTf <sub>2</sub> and Zn(OTf) <sub>2</sub> instead of Co(OTf) <sub>2</sub> | 48                     | 94                  |

<sup>a</sup> Unless otherwise noted, all reactions were performed with Co(OTf)<sub>2</sub>/L<sub>3</sub>-PiPr<sub>2</sub> (1:1, 10 mol%), IPrAuCl/AgNTf<sub>2</sub> (1:1, 5 mol%), **A1** (0.10 mmol), **B1** (0.12 mmol) in CH<sub>2</sub>Cl<sub>2</sub> (1.0 mL) under N<sub>2</sub> atmosphere at 35 °C for 5 h. <sup>b</sup> Yield of isolated product. <sup>c</sup> ee values were determined by UPC<sup>2</sup> on a chiral stationary phase.

**Table S11**

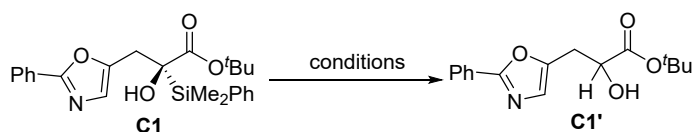

| Entry <sup>a</sup> | conditions                                                                                                                                | Yield of C1' <sup>b</sup> |
|--------------------|-------------------------------------------------------------------------------------------------------------------------------------------|---------------------------|
| 1                  | In(OTf) <sub>3</sub> /L <sub>3</sub> -PrEt <sub>3</sub> (1:1, 10 mol%)                                                                    | 0                         |
| 2                  | Sc(OTf) <sub>3</sub> /L <sub>3</sub> -PrEt <sub>3</sub> (1:1, 10 mol%)                                                                    | 0                         |
| 3                  | Co(OTf) <sub>2</sub> /L <sub>3</sub> -PrEt <sub>3</sub> (1:1, 10 mol%)                                                                    | 0                         |
| 4                  | IPrAuCl/AgNTf <sub>2</sub> (1:1, 5 mol%), In(OTf) <sub>3</sub> /L <sub>3</sub> -PrEt <sub>3</sub> (1:1, 10 mol%)                          | 0                         |
| 5                  | IPrAuCl/AgNTf <sub>2</sub> (1:1, 5 mol%), Sc(OTf) <sub>3</sub> /L <sub>3</sub> -PrEt <sub>3</sub> (1:1, 10 mol%)                          | 0                         |
| 6                  | IPrAuCl/AgNTf <sub>2</sub> (1:1, 5 mol%), Co(OTf) <sub>2</sub> /L <sub>3</sub> -PrEt <sub>3</sub> (1:1, 10 mol%)                          | 0                         |
| 7                  | IPrAuCl/AgNTf <sub>2</sub> (1:1, 5 mol%), In(OTf) <sub>3</sub> /L <sub>3</sub> -PrEt <sub>3</sub> (1:1, 10 mol%) + 10 uL H <sub>2</sub> O | 0                         |
| 8                  | IPrAuCl/AgNTf <sub>2</sub> (1:1, 5 mol%), Sc(OTf) <sub>3</sub> /L <sub>3</sub> -PrEt <sub>3</sub> (1:1, 10 mol%) + 10 uL H <sub>2</sub> O | 0                         |
| 9                  | IPrAuCl/AgNTf <sub>2</sub> (1:1, 5 mol%), Co(OTf) <sub>2</sub> /L <sub>3</sub> -PrEt <sub>3</sub> (1:1, 10 mol%) + 10 uL H <sub>2</sub> O | 0                         |

<sup>a</sup> Unless otherwise noted, all reactions were performed in CH<sub>2</sub>Cl<sub>2</sub> (1.0 mL) under N<sub>2</sub> atmosphere at 35 °C for 5 h. <sup>b</sup> Yield of isolated product.

**Table S12**

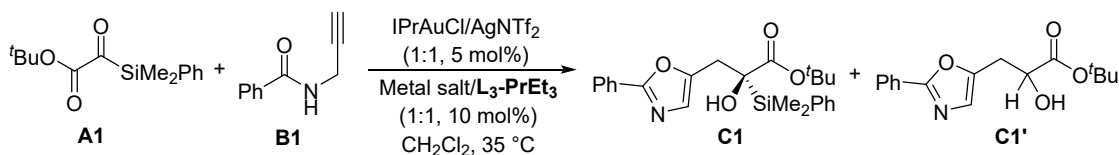

| Entry <sup>a</sup> | conditions                                                                                      | Yield of C1 <sup>b</sup> | Yield of C1' <sup>b</sup> |
|--------------------|-------------------------------------------------------------------------------------------------|--------------------------|---------------------------|
| 1                  | Sc(OTf) <sub>3</sub> /L <sub>3</sub> -PrEt <sub>3</sub> (1:1, 10 mol%)                          | 49                       | 0                         |
| 2                  | Sc(OTf) <sub>3</sub> /L <sub>3</sub> -PrEt <sub>3</sub> (1:1, 10 mol%) + 10 uL H <sub>2</sub> O | 16                       | 21                        |

<sup>a</sup>Unless otherwise noted, all reactions were performed with Metal salts /L<sub>3</sub>-PrEt<sub>3</sub> (1:1, 10 mol%), IPrAuCl/AgNTf<sub>2</sub> (1:1, 5 mol%), **A1** (0.10 mmol), **B1** (0.12 mmol) in CH<sub>2</sub>Cl<sub>2</sub> (1.0 mL) under N<sub>2</sub> atmosphere at 35 °C for 5 h. <sup>b</sup>Yield of isolated product.

To make clear the  $\alpha$ -proton source of **C1'**, the deuterium labeling experiment was carried out with addition of D<sub>2</sub>O. Under an atmosphere of nitrogen, IPrAuCl (3.1 mg, 5 mol%), AgNTf<sub>2</sub> (1.9 mg, 5 mol%), Sc(OTf)<sub>3</sub> (4.9 mg, 10 mol%), L<sub>3</sub>-PrEt<sub>3</sub> (6.2 mg, 10 mol%), silylglyoxylate **A1** (0.10 mmol) and propargyl amides **B1** (0.12 mmol) were stirred in DCM (1 mL) and D<sub>2</sub>O (10  $\mu$ L) at 35 °C for 5 h. **C1'** was observed with 63% deuterated ratio, suggesting the  $\alpha$ -proton of **C1'** might come from water. Based on the above control experimental results, a possible mechanism for the production of **C1'** was also proposed in Figure S3.

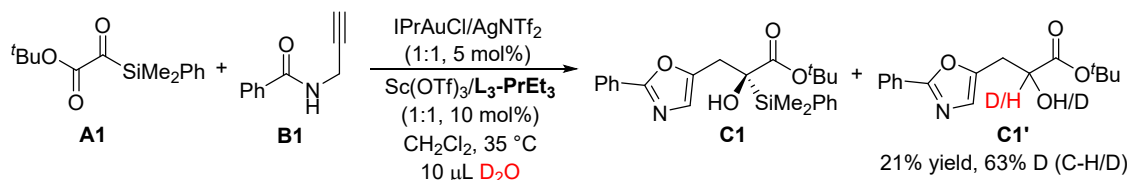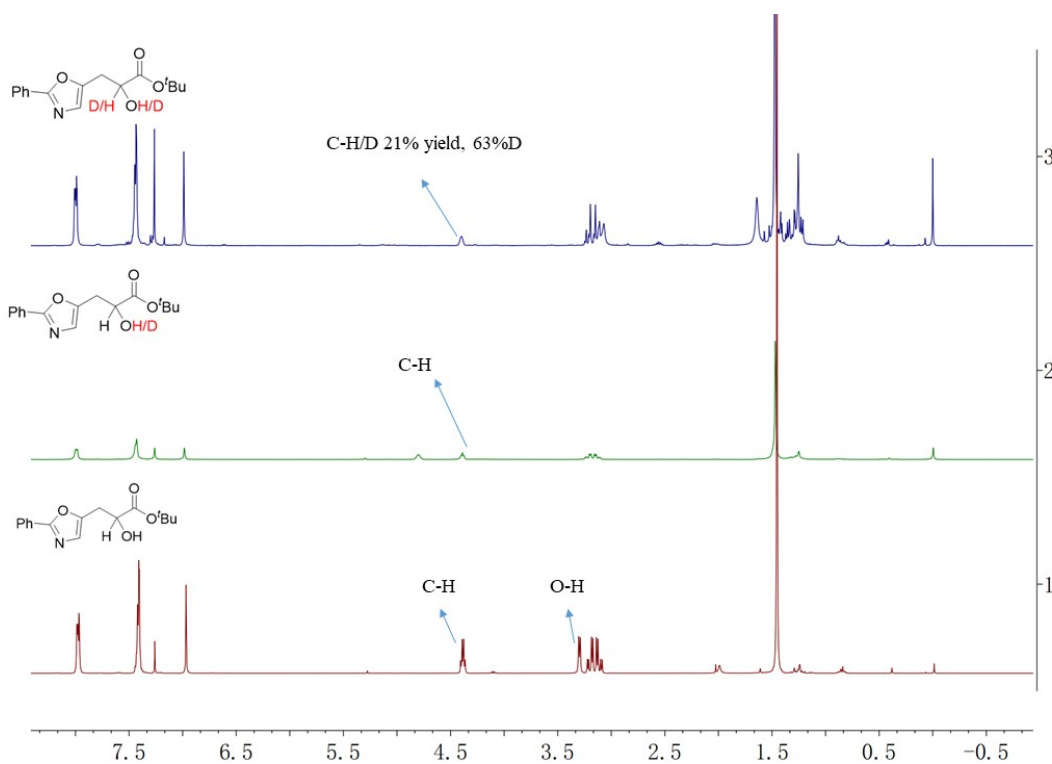

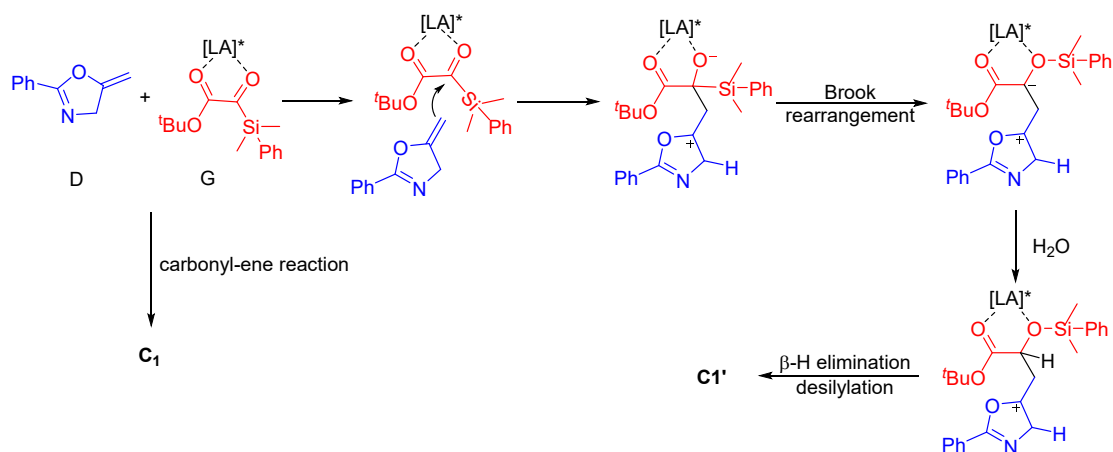

**Figure S3.** The two competing reaction processes

## 7.2 Mechanistic studies

### 7.2.1 UV-Vis spectroscopy

General:  $\text{Co}(\text{OTf})_2$  (0.01 mmol),  $\text{L}_3\text{-PiPr}_2$  (0.01 mmol),  $\text{Co}(\text{OTf})_2 + \text{L}_3\text{-PiPr}_2$  (1:1, 0.01 mmol), **A1** (0.01 mmol),  $\text{Co}(\text{OTf})_2 + \text{A1}$  (1:1, 0.01 mmol),  $\text{Co}(\text{OTf})_2 + \text{L}_3\text{-PiPr}_2 + \text{A1}$  (1:1:1, 0.01 mmol) were dissolved in  $\text{CH}_2\text{Cl}_2$  (1.0 mL), separately. The above solution (0.01 M) stirred at room temperature for 3 hours, then diluted to 0.002 M and analyzed by UV-Vis spectroscopy using a 10.0 mm quartz cuvette. (The concentration shown in below picture is 0.002 M).

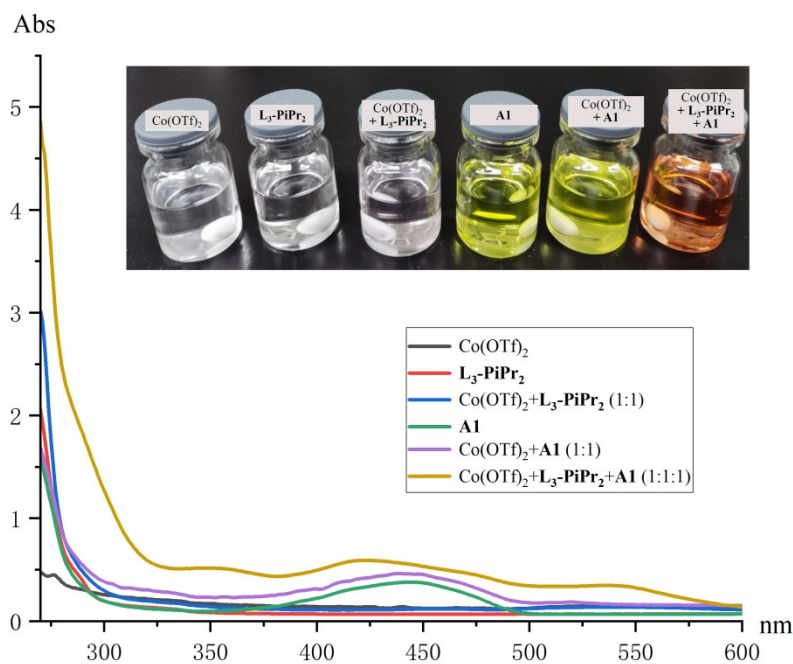

**Figure S4.** UV-Vis spectroscopy of the catalytic components

### 7.2.2 The relationship of the ee values of product **C1** and $\text{L}_3\text{-PiPr}_2$



Combined certain amount of optically pure (*S*)-**L<sub>3</sub>-PiPr<sub>2</sub>** with pure (*R*)-**L<sub>3</sub>-PiPr<sub>2</sub>** led to **L<sub>3</sub>-PiPr<sub>2</sub>** with specified ee values. Six different control reactions were performed in parallel by using **L<sub>3</sub>-PiPr<sub>2</sub>** with 0% ee, 20% ee, 40% ee, 60% ee, 80% ee, and 100% ee. Under an atmosphere of nitrogen, the IPrAuCl (3.1 mg, 5 mol%), AgNTf<sub>2</sub> (1.9 mg, 5mol%), Co(OTf)<sub>2</sub> (3.5 mg, 10 mol%), **L<sub>3</sub>-PiPr<sub>2</sub>** (6.5 mg, 10 mol%), silylglyoxylate **A1** (0.10 mmol) and propargyl amides **B1** (0.12 mmol) were stirred in DCM (1 mL) at 35 °C for 5 h. The residue was purified by column chromatography (petroleum ether : ethyl acetate = 8.5:1) on silica gel to afford the product **C1**. The ee values were determined by UPC<sup>2</sup> on a chiral stationary phase.

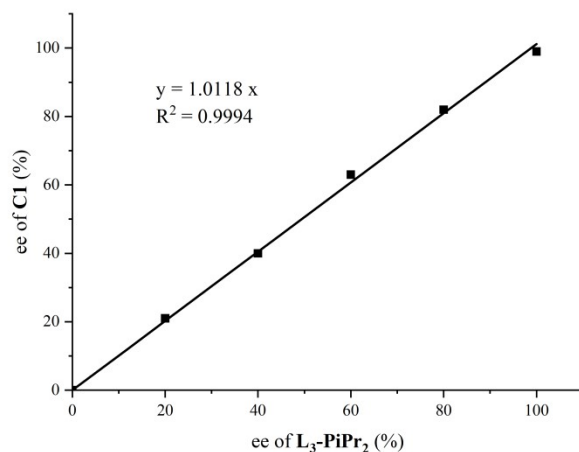

**Figure S5.** The relationship of the ee values of product **C1** and **L<sub>3</sub>-PiPr<sub>2</sub>**

### 7.2.3 The operando IR experiment

General: The reaction was monitored by the operando IR spectrometer using a Mettler Toledo ReactIR™. First, the infrared absorption spectra of each reactants **A1** and **B1**, intermediate **D** and product **C1** in CH<sub>2</sub>Cl<sub>2</sub> (1.0 mL) were collected. The following figure shows the absorption of each participant minus the absorption of solvent. Peak at 1516 cm<sup>-1</sup> was identified as the characteristic absorption of reactant **B1**, 1114 cm<sup>-1</sup> for **A1**, 1263 cm<sup>-1</sup> for **D**, and 955 cm<sup>-1</sup> for **C1**.

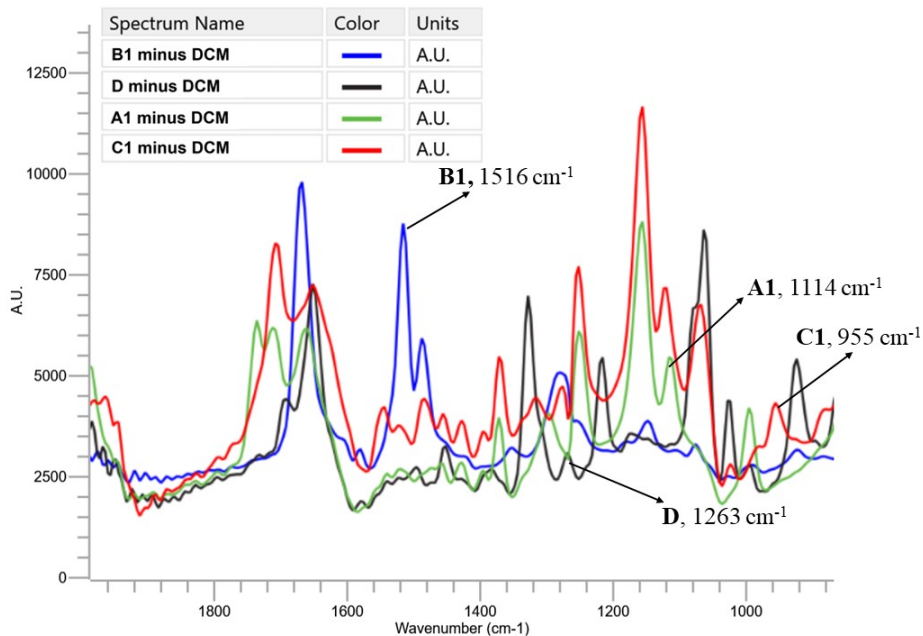

Then, an oven-dried flask with three necks was equipped with a stir bar and attached to a React IR probe. And then the system was charged with 5.0 mL of a stock solution containing the 0.025 mmol (IPrAuCl /AgNTf<sub>2</sub>, 1:1, 5 mol%), 0.05 mmol catalyst (Co(OTf)<sub>2</sub>/L<sub>3</sub>-PiPr<sub>2</sub>, 1:1, 10 mol%), 0.6 mmol propargyl amides (**B1**) and 0.5 mmol silyl glyoxylate (**A1**) in CH<sub>2</sub>Cl<sub>2</sub>. The reaction was heated to 35 °C using a water bath. Then starting to collect data. The React IR spectra were recorded over the process of the reaction. The reaction progress is monitored by the absorbance of **D** increased and then decreased at 1263 cm<sup>-1</sup>.

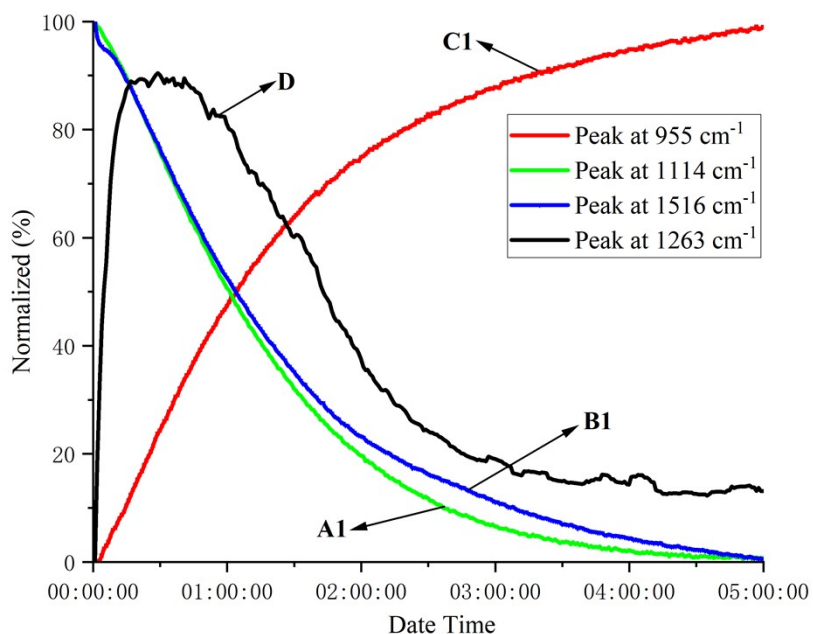

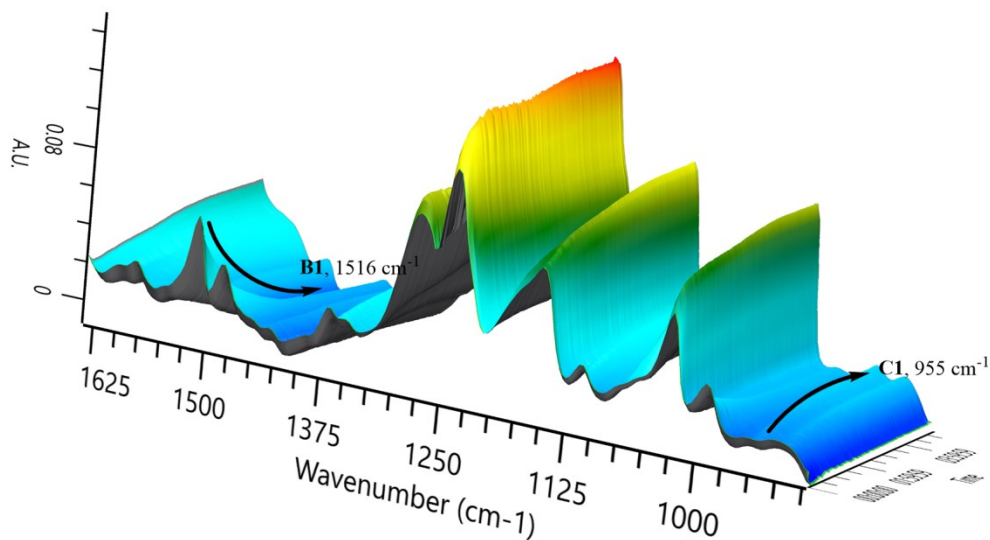

**Figure S6.** The operando IR experiment

## 8. X-ray crystal structure

The crystal of product **C20** was obtained in the solvents of PE and CH<sub>2</sub>Cl<sub>2</sub>. CCDC: 2207796 contains the supplementary crystallographic data for this paper. These data can be obtained free of charge from The Cambridge Crystallographic Data Center via <https://www.ccdc.cam.ac.uk/structures/>.

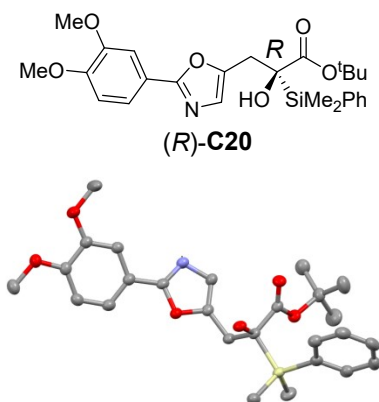

**Figure S7.** X-ray crystal structure of product **C20**

Crystallographic Data for C<sub>26</sub> H<sub>33</sub> N O<sub>6</sub> Si.

|                    |                                                     |
|--------------------|-----------------------------------------------------|
| Formula            | C <sub>26</sub> H <sub>33</sub> N O <sub>6</sub> Si |
| Formula mass (amu) | 483.62                                              |
| Space group        | C 2 2 21                                            |
| <i>a</i> (Å)       | 12.5846(4)                                          |
| <i>b</i> (Å)       | 22.3829(7)                                          |

|                                                   |             |
|---------------------------------------------------|-------------|
| $c$ (Å)                                           | 20.1826(6)  |
| $\alpha$ (deg)                                    | 90          |
| $\beta$ (deg)                                     | 90          |
| $\gamma$ (deg)                                    | 90          |
| $V$ (Å <sup>3</sup> )                             | 5685.0(3)   |
| $Z$                                               | 8           |
| $\lambda$ (Å)                                     | 1.54178     |
| $T$ (K)                                           | 142 K       |
| $\rho_{\text{calcd}}$ (g cm <sup>-3</sup> )       | 1.130       |
| $\mu$ (mm <sup>-1</sup> )                         | 1.031       |
| Transmission factors                              | 0.766-0.928 |
| $\theta_{\text{max}}$ (deg)                       | 68.349      |
| No. of unique data, including $F_o^2 < 0$         | 5225        |
| No. of unique data, with $F_o^2 > 2\sigma(F_o^2)$ | 5021        |
| No. of variables                                  | 318         |
| $R(F)$ for $F_o^2 > 2\sigma(F_o^2)$ <sup>a</sup>  | 0.0252      |
| $R_w(F_o^2)$ <sup>b</sup>                         | 0.0644      |
| Goodness of fit                                   | 1.037       |

---

<sup>a</sup>  $R(F) = \sum ||F_o| - |F_c|| / \sum |F_o|$ .

<sup>b</sup>  $R_w(F_o^2) = [\sum [w(F_o^2 - F_c^2)^2] / \sum wF_o^4]^{1/2}$ ;  $w^{-1} = [\sigma^2(F_o^2) + (Ap)^2 + Bp]$ , where  $p = [\max(F_o^2, 0) + 2F_c^2] / 3$ .

## 9. The analytical and spectral characterization data for the products

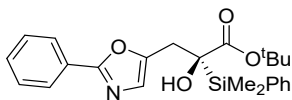

### ***Tert*-butyl (*R*)-2-(dimethyl(phenyl)silyl)-2-hydroxy-3-(2-phenyloxazol-5-yl)propanoate (C1)**

(C<sub>24</sub>H<sub>29</sub>NO<sub>4</sub>Si) 37.3 mg, 88% yield, 99% ee; Colorless oil; R<sub>f</sub> = 0.4 (petroleum ether/ethyl acetate = 7:1). [α]<sub>D</sub><sup>24</sup> = -8.2 (c = 1.60, in CH<sub>2</sub>Cl<sub>2</sub>). Dissolved in *i*-PrOH for UPC<sup>2</sup> (Daicel Chiralpak **IA-3**, CO<sub>2</sub>/MeOH = 95/5, flow rate = 1.5 mL/min, λ = 254 nm), retention time: tr (minor) = 4.54 min, tr (major) = 4.93 min.

<sup>1</sup>H NMR (400 MHz, CDCl<sub>3</sub>) δ 8.00 – 7.92 (m, 2H), 7.67 – 7.60 (m, 2H), 7.44 – 7.36 (m, 6H), 6.94 – 6.88 (m, 1H), 3.29 (d, *J* = 15.6 Hz, 1H), 3.23 (s, 1H), 3.13 (d, *J* = 15.6, 1H), 1.33 (s, 9H), 0.49 (d, *J* = 6.4 Hz, 6H).

<sup>13</sup>C NMR (101 MHz, CDCl<sub>3</sub>) δ 175.4, 160.9, 148.6, 134.7, 134.4, 130.0, 129.9, 128.7, 127.8, 127.6, 126.1, 126.0, 82.8, 72.0, 31.9, 28.0, -5.4, -5.4.

HRMS (ESI+) *m/z* calcd for C<sub>24</sub>H<sub>29</sub>NO<sub>4</sub>Si [M+H]<sup>+</sup> :424.1939, found: 424.1933.

IR (neat): 2974, 1706, 1539, 1547, 1482, 1426, 1368, 1249, 1152, 1120, 1065, 954, 833, 810, 779, 735, 692 cm<sup>-1</sup>.

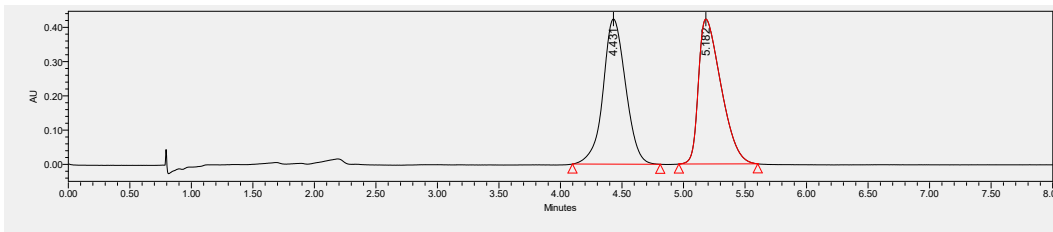

| Entry | Retention Time | Area    | % Area |
|-------|----------------|---------|--------|
| 1     | 4.431          | 5394795 | 50.08  |
| 2     | 5.182          | 5377490 | 49.92  |

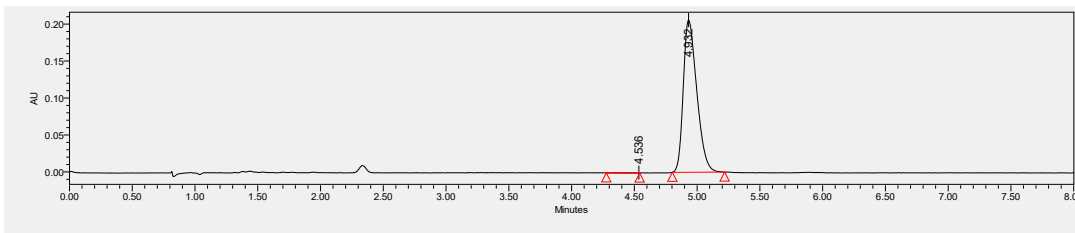

| Entry | Retention Time | Area    | % Area |
|-------|----------------|---------|--------|
| 1     | 4.536          | 2159    | 0.14   |
| 2     | 4.932          | 1535827 | 99.86  |

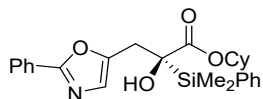

**Cyclohexyl (*R*)-2-(dimethyl(phenyl)silyl)-2-hydroxy-3-(2-phenyloxazol-5-yl)propanoate (C2)**

(C<sub>26</sub>H<sub>31</sub>NO<sub>4</sub>Si) 36.4 mg, 81% yield, 99% ee; Colorless oil; R<sub>f</sub> = 0.4 (petroleum ether/ethyl acetate = 7:1). [α]<sub>D</sub><sup>24</sup> = -9.7 (c = 0.91, in CH<sub>2</sub>Cl<sub>2</sub>). Dissolved in *i*-PrOH for UPC<sup>2</sup> (Daicel Chiralcel **OZ-3**, CO<sub>2</sub>/MeOH = 90/10, flow rate = 1.5 mL/min, λ = 254 nm), retention time: tr (minor) = 5.72 min, tr (major) = 9.84 min.

<sup>1</sup>H NMR (400 MHz, CDCl<sub>3</sub>) δ 7.98 – 7.88 (m, 2H), 7.65 – 7.58 (m, 2H), 7.46 – 7.34 (m, 6H), 6.90 (s, 1H), 4.88 – 4.66 (m, 1H), 3.44 – 3.25 (d, *J* = 15.2 Hz, 1H), 3.23 – 3.07 (m, 2H), 1.85 – 1.59 (m, 5H), 1.54 – 1.47 (m, 1H), 1.40 – 1.28 (m, 4H), 0.50 (d, *J* = 1.6 Hz, 6H).

<sup>13</sup>C NMR (101 MHz, CDCl<sub>3</sub>) δ 175.9, 161.1, 148.6, 134.8, 134.3, 130.1, 130.1, 128.8, 128.0, 127.8, 126.3, 126.2, 74.9, 72.2, 32.1, 31.9, 27.1, 25.4, 23.9, 23.8, -5.3, -5.3.

**ESI-HRMS:** calcd for C<sub>26</sub>H<sub>32</sub>NO<sub>4</sub>Si<sup>+</sup> ([M + H]<sup>+</sup>) = 450.2095, found: 450.2100.

**IR** (neat): 2937, 1709, 1548, 1450, 1427, 1247, 1121, 1067, 1011, 811, 780, 735, 701 cm<sup>-1</sup>.

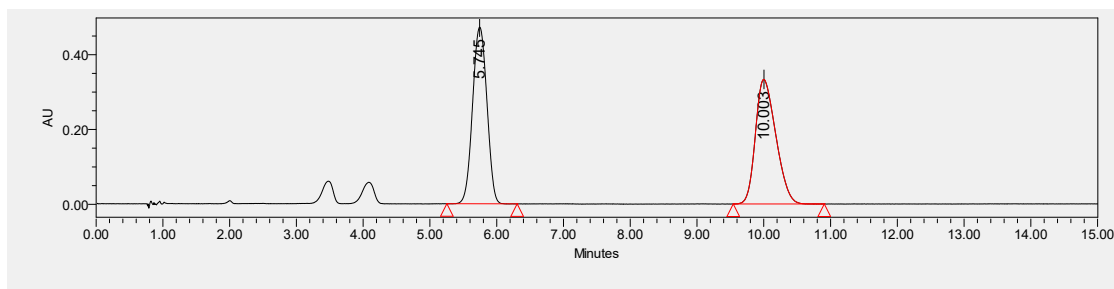

| Entry | Retention Time | Area    | % Area |
|-------|----------------|---------|--------|
| 1     | 5.745          | 7052429 | 49.95  |
| 2     | 10.003         | 7067453 | 50.05  |

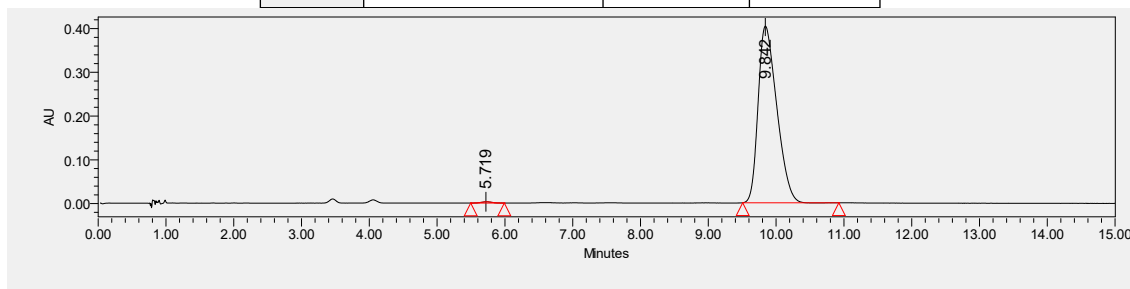

| Entry | Retention Time | Area    | % Area |
|-------|----------------|---------|--------|
| 1     | 5.719          | 30582   | 0.40   |
| 2     | 9.842          | 7700711 | 99.60  |

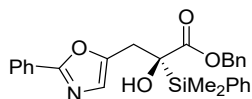

**Benzyl (*R*)-2-(dimethyl(phenyl)silyl)-2-hydroxy-3-(2-phenyloxazol-5-yl)propanoate (C3)**

(C<sub>27</sub>H<sub>27</sub>NO<sub>4</sub>Si) 26.1 mg, 57% yield, 99% ee; Colorless oil; R<sub>f</sub> = 0.4 (petroleum ether/ethyl acetate = 7:1). [α]<sub>D</sub><sup>24</sup> = -19.4 (c = 0.66, in CH<sub>2</sub>Cl<sub>2</sub>). Dissolved in *i*-PrOH for UPC<sup>2</sup> (Daicel Chiralpak **AY-3**, CO<sub>2</sub>/MeOH = 90/10, flow rate = 1.5 mL/min, λ = 254 nm), retention time: tr (minor) = 6.84 min, tr (major) = 5.49 min.

<sup>1</sup>H NMR (400 MHz, CDCl<sub>3</sub>) δ 7.92 – 7.85 (m, 2H), 7.53 – 7.47 (m, 2H), 7.42-7.37 (m, 4H), 7.36 – 7.30 (m, 5H), 7.27 – 7.23 (m, 2H), 6.85-6.82 (m, 1H), 5.17 – 5.05 (m, 2H), 3.34 (d, *J* = 15.6 Hz, 1H), 3.13 (dd, *J* = 15.6, 0.8 Hz, 1H), 3.08 (s, 1H), 0.44 (d, *J* = 4.4 Hz, 6H).

<sup>13</sup>C NMR (101 MHz, CDCl<sub>3</sub>) δ 176.4, 161.2, 148.4, 135.1, 134.7, 134.0, 130.2, 130.2, 128.9, 128.8, 128.0, 127.7, 126.4, 126.2, 72.7, 67.9, 32.0, -5.4, -5.6.

ESI-HRMS: calcd for C<sub>27</sub>H<sub>28</sub>NO<sub>4</sub>Si<sup>+</sup> ([M + H]<sup>+</sup>) = 458.1782, found: 458.1780.

IR (neat): 2958, 1718, 1593, 1548, 1485, 1249, 1214, 1174, 1069, 952, 836, 815, 780, 696 cm<sup>-1</sup>.

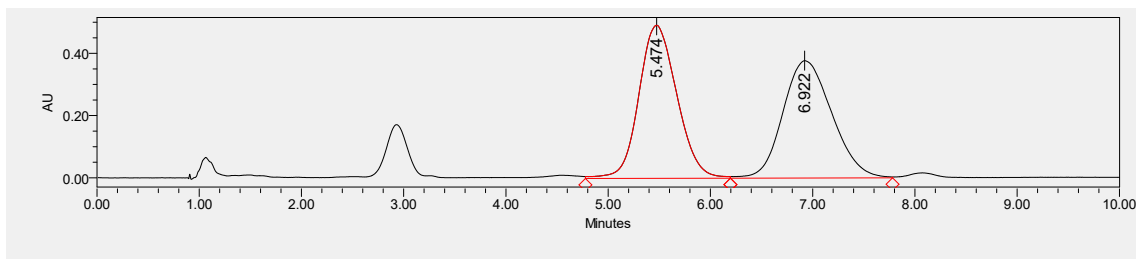

| Entry | Retention Time | Area     | % Area |
|-------|----------------|----------|--------|
| 1     | 5.474          | 12735225 | 50.33  |
| 2     | 6.922          | 12566080 | 49.67  |

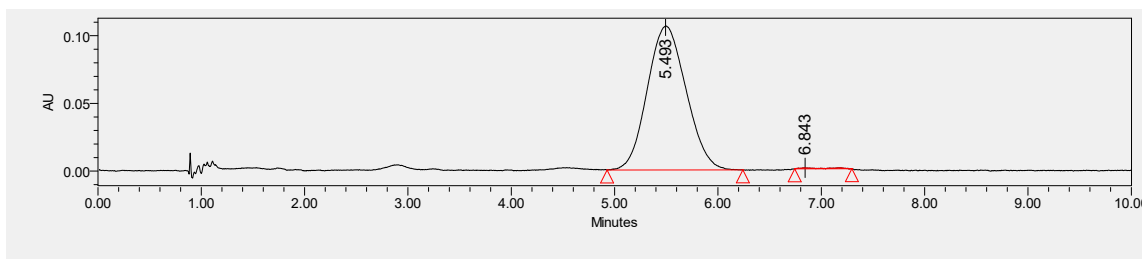

| Entry | Retention Time | Area    | % Area |
|-------|----------------|---------|--------|
| 1     | 5.493          | 2772671 | 99.51  |
| 2     | 6.843          | 13706   | 0.49   |

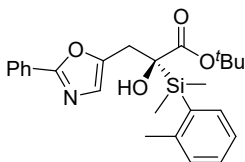

**Tert-butyl (*R*)-2-(dimethyl(*o*-tolyl)silyl)-2-hydroxy-3-(2-phenyloxazol-5-yl)propanoate (C4)**

(C<sub>25</sub>H<sub>31</sub>NO<sub>4</sub>Si) 31.1 mg, 71% yield, 88% ee; Colorless oil; R<sub>f</sub> = 0.4 (petroleum ether/ethyl acetate = 7:1). [α]<sub>D</sub><sup>23</sup> = -8.1 (c = 0.78, in CH<sub>2</sub>Cl<sub>2</sub>). Dissolved in *i*-PrOH for UPC<sup>2</sup> (Daicel Chiralpak **AZ-3**, CO<sub>2</sub>/MeOH = 90/10, flow rate = 1.5 mL/min, λ = 254 nm), retention time: tr (major) = 4.91 min, tr (minor) = 4.00 min.

<sup>1</sup>H NMR (400 MHz, CDCl<sub>3</sub>) δ 8.01 – 7.92 (m, 2H), 7.57 – 7.49 (m, 1H), 7.44 – 7.39 (m, 3H), 7.33 – 7.26 (m, 1H), 7.22 – 7.12 (m, 2H), 6.93 (s, 1H), 3.33 (d, *J* = 15.6 Hz, 1H), 3.23 (s, 1H), 3.14 (d, *J* = 15.6 Hz, 1H), 2.55 (s, 3H), 1.29 (s, 9H), 0.57 (d, *J* = 6.8 Hz, 6H).

<sup>13</sup>C NMR (101 MHz, CDCl<sub>3</sub>) δ 175.7, 161.0, 148.8, 145.1, 136.2, 133.0, 130.5, 130.2, 130.1, 128.8, 127.8, 126.3, 124.9, 83.0, 72.5, 32.6, 28.1, 24.2, -2.4, -2.6.

**ESI-HRMS:** calcd for C<sub>25</sub>H<sub>32</sub>NO<sub>4</sub>Si<sup>+</sup> ([M + H]<sup>+</sup>) = 438.2095, found: 438.2093.

**IR** (neat): 2975, 1710, 1592, 1450, 1368, 1155, 1126, 1068, 952, 838, 779, 747, 713, 690 cm<sup>-1</sup>.

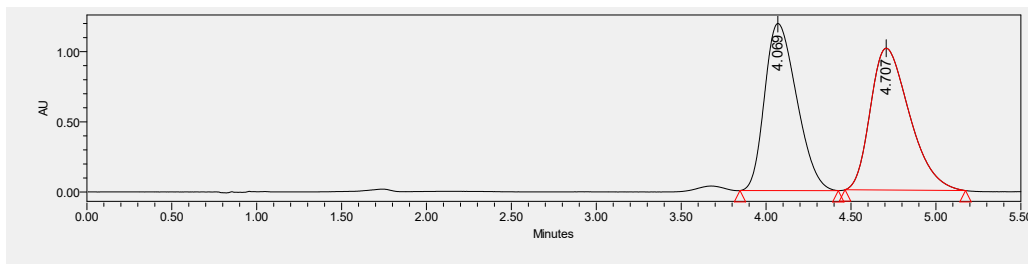

| Entry | Retention Time | Area     | % Area |
|-------|----------------|----------|--------|
| 1     | 4.069          | 15613317 | 49.11  |
| 2     | 4.707          | 16177185 | 50.89  |

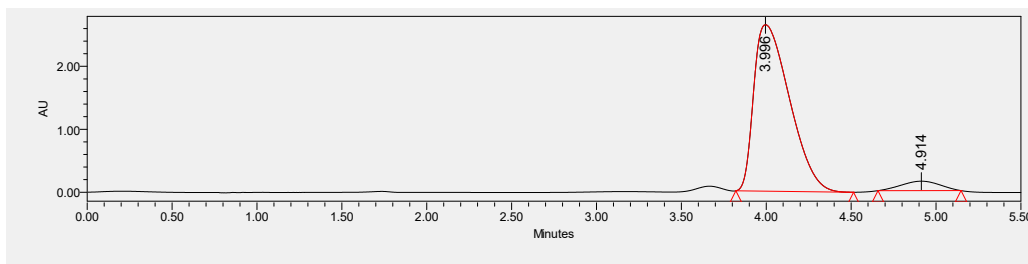

| Entry | Retention Time | Area     | % Area |
|-------|----------------|----------|--------|
| 1     | 3.996          | 38713264 | 94.24  |
| 2     | 4.914          | 2366028  | 5.76   |



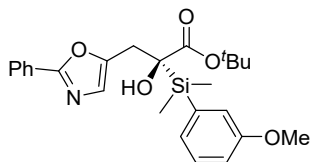

**Tert-butyl (*R*)-2-hydroxy-2-((3-methoxyphenyl)dimethylsilyl)-3-(2-phenyloxazol-5-yl)propanoate (C5)**

(C<sub>25</sub>H<sub>31</sub>NO<sub>5</sub>Si) 36.7 mg, 81% yield, 99% ee; Colorless oil; R<sub>f</sub> = 0.4 (petroleum ether/ethyl acetate = 7:1). [α]<sub>D</sub><sup>25</sup> = -8.6 (c = 0.92, in CH<sub>2</sub>Cl<sub>2</sub>). Dissolved in *i*-PrOH for UPC<sup>2</sup> (Daicel Chiralcel **OZ-3**, CO<sub>2</sub>/MeOH = 90/10, flow rate = 1.5 mL/min, λ = 254 nm), retention time: tr (minor) = 3.39 min, tr (major) = 4.92 min.

<sup>1</sup>H NMR (400 MHz, CDCl<sub>3</sub>) δ 8.00 – 7.91 (m, 2H), 7.46 – 7.37 (m, 3H), 7.35 – 7.28 (m, 1H), 7.23 – 7.14 (m, 2H), 6.97 – 6.91 (m, 2H), 3.82 (s, 3H), 3.28 (d, *J* = 15.2 Hz, 1H), 3.22 (s, 1H), 3.13 (d, *J* = 15.6 Hz, 1H), 1.34 (s, 9H), 0.47 (d, *J* = 5.2 Hz, 6H).

<sup>13</sup>C NMR (101 MHz, CDCl<sub>3</sub>) δ 175.6, 161.0, 159.0, 148.8, 136.1, 130.1, 129.2, 128.8, 127.8, 127.1, 126.3, 126.2, 120.6, 115.0, 83.0, 72.1, 55.3, 32.1, 28.2, -5.2, -5.2.

**ESI-HRMS:** calcd for C<sub>25</sub>H<sub>32</sub>NO<sub>5</sub>Si<sup>+</sup> ([M + H]<sup>+</sup>) = 454.2044, found: 454.2044.

**IR** (neat): 2974, 1709, 1570, 1481, 1407, 1368, 1248, 1155, 1068, 955, 806, 779, 712, 692 cm<sup>-1</sup>.

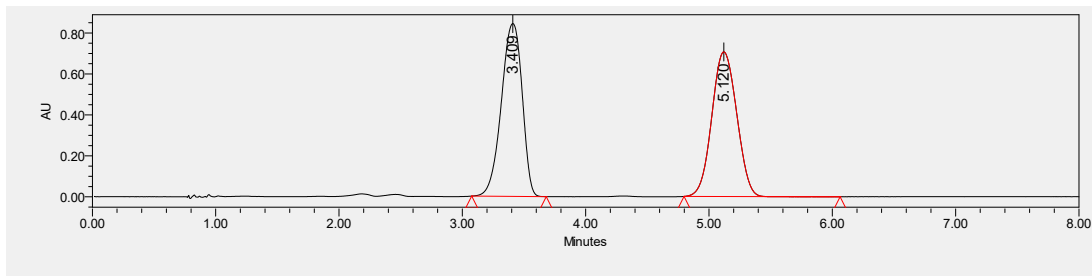

| Entry | Retention Time | Area    | % Area |
|-------|----------------|---------|--------|
| 1     | 3.409          | 9892569 | 49.99  |
| 2     | 5.120          | 9896733 | 50.01  |

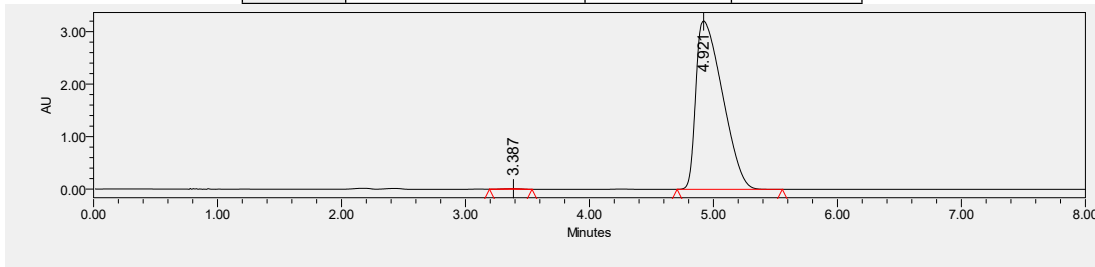

| Entry | Retention Time | Area     | % Area |
|-------|----------------|----------|--------|
| 1     | 3.387          | 112021   | 0.23   |
| 2     | 4.921          | 47741720 | 99.77  |

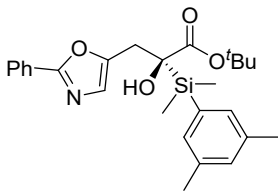

**Tert-butyl (*R*)-2-((3,5-dimethylphenyl)dimethylsilyl)-2-hydroxy-3-(2-phenyloxazol-5-yl)propanoate (C6)**

(C<sub>26</sub>H<sub>33</sub>NO<sub>4</sub>Si) 37.0 mg, 82% yield, 99% ee; Colorless oil; R<sub>f</sub> = 0.4 (petroleum ether/ethyl acetate = 7:1). [α]<sub>D</sub><sup>24</sup> = -9.4 (c = 0.93, in CH<sub>2</sub>Cl<sub>2</sub>). Colorless oil; 82% yield, 99% ee. Dissolved in *i*-PrOH for UPC<sup>2</sup> (Daicel Chiralcel **OZ-3**, CO<sub>2</sub>/MeOH = 90/10, flow rate = 1.5 mL/min, λ = 254 nm), retention time: tr (minor) = 2.76 min, tr (major) = 4.36 min.

<sup>1</sup>H NMR (400 MHz, CDCl<sub>3</sub>) δ 8.01 – 7.88 (m, 2H), 7.47 – 7.37 (m, 3H), 7.23 – 7.18 (m, 2H), 7.08 – 7.00 (m, 1H), 6.92 (s, 1H), 3.28 (d, *J* = 15.6, 1H), 3.19 (s, 1H), 3.14 (d, *J* = 15.6 Hz, 1H), 2.33 (s, 6H), 1.35 (s, 9H), 0.46 (d, *J* = 5.2 Hz, 6H).

<sup>13</sup>C NMR (101 MHz, CDCl<sub>3</sub>) δ 175.7, 161.0, 148.9, 137.2, 134.2, 132.5, 131.8, 130.1, 128.8, 127.8, 126.2, 126.1, 82.8, 72.2, 32.0, 28.2, 21.5, -5.2.

**ESI-HRMS:** calcd for C<sub>26</sub>H<sub>34</sub>NO<sub>4</sub>Si<sup>+</sup> ([M + H]<sup>+</sup>) = 452.2252, found: 452.2254.

**IR (neat):** 2975, 1708, 1594, 1481, 1368, 1250, 1155, 1067, 952, 869, 833, 799, 779, 712, 692 cm<sup>-1</sup>.

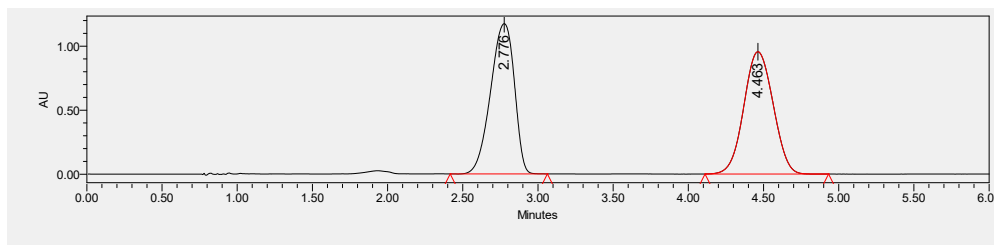

| Entry | Retention Time | Area     | % Area |
|-------|----------------|----------|--------|
| 1     | 2.776          | 12903108 | 49.94  |
| 2     | 4.463          | 12932711 | 50.06  |

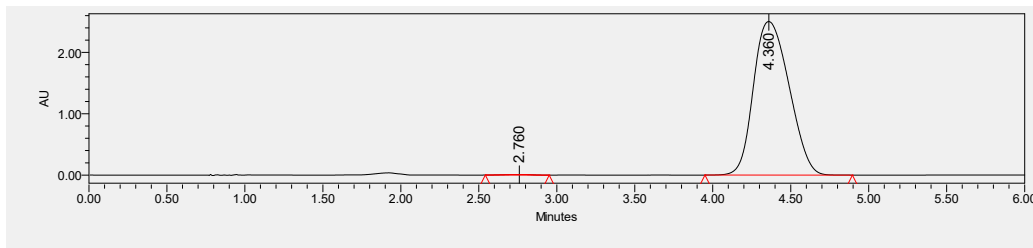

| Entry | Retention Time | Area     | % Area |
|-------|----------------|----------|--------|
| 1     | 2.760          | 110098   | 0.28   |
| 2     | 4.360          | 39753475 | 99.72  |

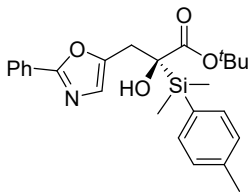

**Tert-butyl (*R*)-2-(dimethyl(*p*-tolyl)silyl)-2-hydroxy-3-(2-phenyloxazol-5-yl)propanoate (C7)**

(C<sub>25</sub>H<sub>31</sub>NO<sub>4</sub>Si) 36.3 mg, 83% yield, 99% ee; Colorless oil; R<sub>f</sub> = 0.4 (petroleum ether/ethyl acetate = 7:1). [α]<sub>D</sub><sup>23</sup> = -7.3 (c = 0.91, in CH<sub>2</sub>Cl<sub>2</sub>). Dissolved in *i*-PrOH for UPC<sup>2</sup> (Daicel Chiralcel **OZ-3**, CO<sub>2</sub>/MeOH = 90/10, flow rate = 1.5 mL/min, λ = 254 nm), retention time: tr (minor) = 3.12 min, tr (major) = 5.00 min.

<sup>1</sup>H NMR (400 MHz, CDCl<sub>3</sub>) δ 7.99 – 7.90 (m, 2H), 7.56 – 7.48 (m, 2H), 7.45-7.38 (m, 3H), 7.23 – 7.17 (m, 2H), 6.94-6.89 (m, 1H), 3.28 (dd, *J* = 15.6, 0.8 Hz, 1H), 3.20 (s, 1H), 3.12 (d, *J* = 15.6 Hz, 1H), 2.35 (s, 3H), 1.35 (s, 9H), 0.46 (d, *J* = 1.6 Hz, 6H).

<sup>13</sup>C NMR (101 MHz, CDCl<sub>3</sub>) δ 175.7, 161.0, 148.9, 140.0, 134.9, 130.8, 130.1, 128.8, 127.8, 126.3, 126.1, 82.9, 72.2, 32.0, 28.2, 21.7, -5.2, -5.3.

ESI-HRMS: calcd for C<sub>25</sub>H<sub>32</sub>NO<sub>4</sub>SiK<sup>+</sup> ([M + K]<sup>+</sup>) = 476.1654, found: 476.1647.

IR (neat): 2975, 1708, 1548, 1482, 1368, 1250, 1155, 1107, 1067, 954, 836, 795, 712, 691 cm<sup>-1</sup>.

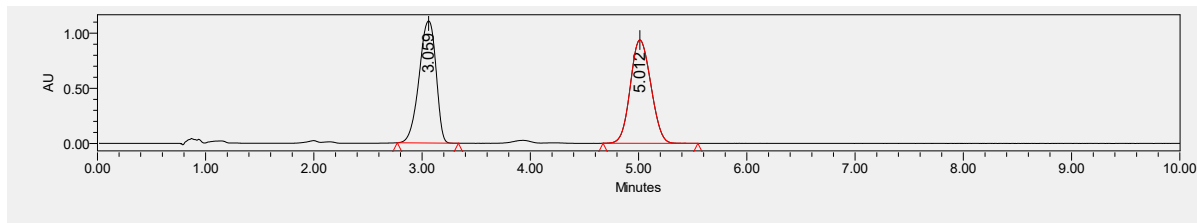

| Entry | Retention Time | Area     | % Area |
|-------|----------------|----------|--------|
| 1     | 3.059          | 11967854 | 49.27  |
| 2     | 5.012          | 12323274 | 50.73  |

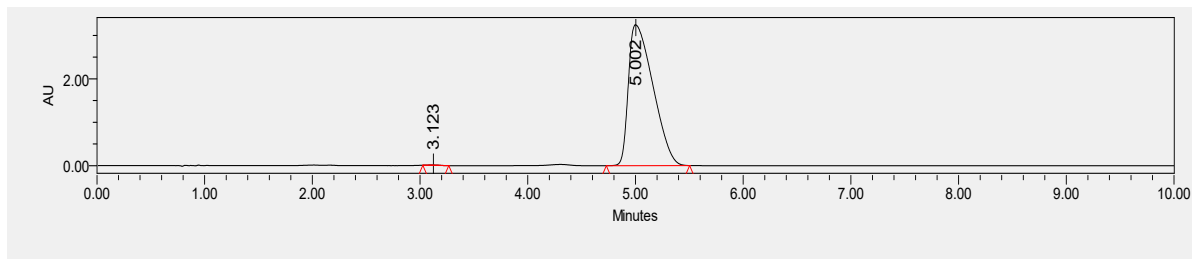

| Entry | Retention Time | Area     | % Area |
|-------|----------------|----------|--------|
| 1     | 3.123          | 61883    | 0.12   |
| 2     | 5.002          | 51285007 | 99.88  |

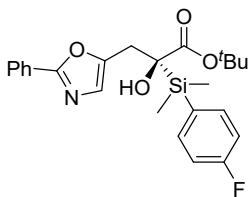

**Tert-butyl (R)-2-((4-fluorophenyl)dimethylsilyl)-2-hydroxy-3-(2-phenyloxazol-5-yl)propanoate (C8)**

(C<sub>24</sub>H<sub>28</sub>FNO<sub>4</sub>Si) 38.9 mg, 88% yield, 99% ee; Colorless oil; R<sub>f</sub> = 0.4 (petroleum ether/ethyl acetate = 7:1). [α]<sub>D</sub><sup>24</sup> = -9.6 (c = 0.97, in CH<sub>2</sub>Cl<sub>2</sub>). Dissolved in *i*-PrOH for UPC<sup>2</sup> (Daicel Chiralcel **OZ-3**, CO<sub>2</sub>/MeOH = 90/10, flow rate = 1.5 mL/min, λ = 254 nm), retention time: tr (minor) = 2.65 min, tr (major) = 3.47 min.

<sup>1</sup>H NMR (400 MHz, CDCl<sub>3</sub>) δ 8.00 – 7.90 (m, 2H), 7.64-7.55 (m, 2H), 7.46-7.36 (m, 3H), 7.13 – 7.02 (m, 2H), 6.94-6.89 (m, 1H), 3.32 – 3.18 (m, 2H), 3.10 (d, *J* = 15.2 Hz, 1H), 1.34 (s, 9H), 0.47 (d, *J* = 3.2 Hz, 6H).

<sup>13</sup>C NMR (101 MHz, CDCl<sub>3</sub>) δ 175.5, 165.6, 163.2, 161.1, 148.6, 136.8 (d, *J* = 7.1 Hz), 130.1 (d, *J* = 8.1 Hz), 128.8, 127.7, 126.3, 115.3, 115.1, 83.1, 72.0, 32.1, 28.2, -5.0, -5.1.

<sup>19</sup>F NMR (377 MHz, CDCl<sub>3</sub>) δ -110.51.

**ESI-HRMS:** calcd for C<sub>24</sub>H<sub>29</sub>FNO<sub>4</sub>Si<sup>+</sup> ([M + H]<sup>+</sup>) = 442.1844, found: 442.1842.

**IR** (neat): 2976, 1710, 1589, 1499, 1369, 1251, 1159, 1105, 1068, 955, 836, 781, 713, 691 cm<sup>-1</sup>.

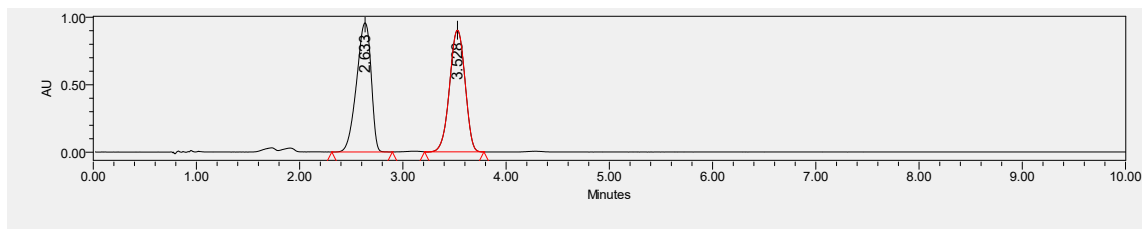

| Entry | Retention Time | Area    | % Area |
|-------|----------------|---------|--------|
| 1     | 2.633          | 9357737 | 50.01  |
| 2     | 3.528          | 9352999 | 49.99  |

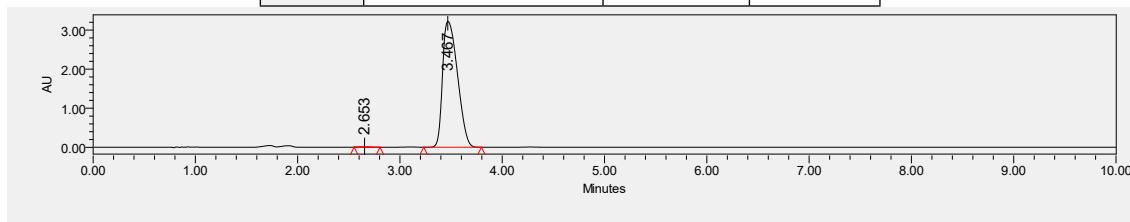

| Entry | Retention Time | Area     | % Area |
|-------|----------------|----------|--------|
| 1     | 2.653          | 44319    | 0.14   |
| 2     | 3.467          | 32610094 | 99.86  |

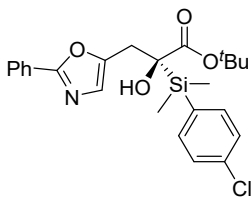

**Tert-butyl (R)-2-((4-chlorophenyl)dimethylsilyl)-2-hydroxy-3-(2-phenyloxazol-5-yl)propanoate (C9)**

(C<sub>24</sub>H<sub>28</sub>ClNO<sub>4</sub>Si) 35.3 mg, 77% yield, 99% ee; Colorless oil; R<sub>f</sub> = 0.4 (petroleum ether/ethyl acetate = 7:1). [α]<sub>D</sub><sup>24</sup> = -4.1 (c = 0.88, in CH<sub>2</sub>Cl<sub>2</sub>). Dissolved in *i*-PrOH for UPC<sup>2</sup> (Daicel Chiralcel **OZ-3**, CO<sub>2</sub>/MeOH = 90/10, flow rate = 1.5 mL/min, λ = 254 nm), retention time: tr (minor) = 3.71 min, tr (major) = 5.51 min.

<sup>1</sup>H NMR (400 MHz, CDCl<sub>3</sub>) δ 7.99 – 7.90 (m, 2H), 7.58 – 7.51 (m, 2H), 7.45 – 7.38 (m, 3H), 7.38 – 7.32 (m, 2H), 6.94 – 6.87 (m, 1H), 3.25 (dd, *J* = 15.6, 0.8 Hz, 1H), 3.22 (s, 9H), 3.10 (d, *J* = 15.2 Hz, 1H), 1.35 (s, 9H), 0.47 (d, *J* = 1.6 Hz, 6H).

<sup>13</sup>C NMR (101 MHz, CDCl<sub>3</sub>) δ 175.4, 161.1, 148.5, 136.5, 136.2, 132.9, 130.2, 128.9, 128.2, 127.7, 126.3, 83.2, 72.0, 32.1, 28.2, -5.1, -5.2.

**ESI-HRMS:** calcd for C<sub>24</sub>H<sub>29</sub><sup>35</sup>ClNO<sub>4</sub>Si<sup>+</sup> ([M + H]<sup>+</sup>) = 458.1549, found: 458.1546. C<sub>24</sub>H<sub>29</sub><sup>37</sup>ClNO<sub>4</sub>Si<sup>+</sup> ([M + H]<sup>+</sup>) = 460.1519, found: 460.1519.

**IR** (neat): 2976, 1711, 1577, 1484, 1369, 1252, 1154, 1083, 955, 835, 806, 781, 712, 691 cm<sup>-1</sup>.

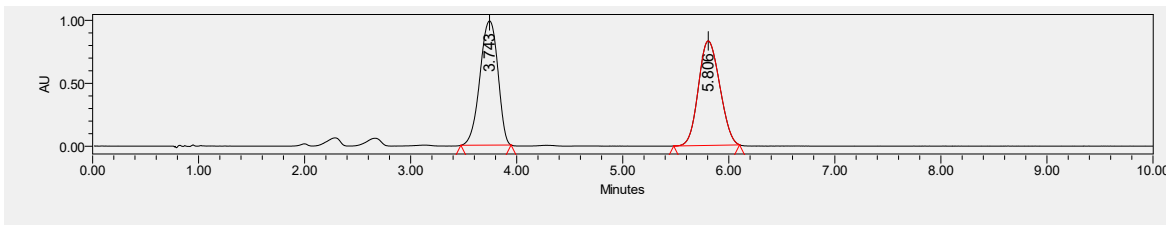

| Entry | Retention Time | Area     | % Area |
|-------|----------------|----------|--------|
| 1     | 3.743          | 11589790 | 50.00  |
| 2     | 5.806          | 11589488 | 50.00  |

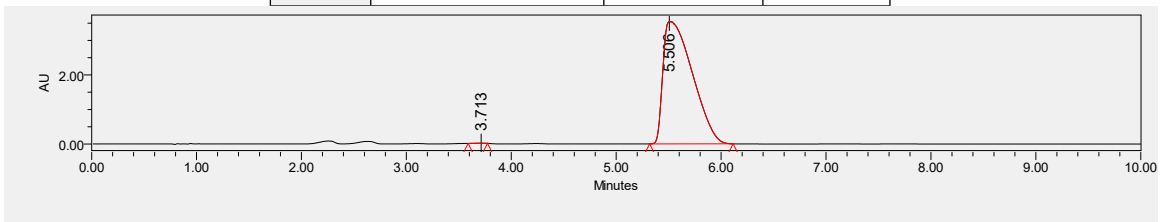

| Entry | Retention Time | Area     | % Area |
|-------|----------------|----------|--------|
| 1     | 3.713          | 37005    | 0.05   |
| 2     | 5.506          | 68879175 | 99.95  |

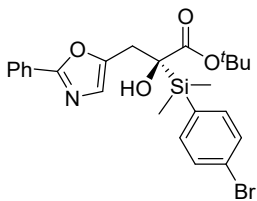

**Tert-butyl (R)-2-((4-bromophenyl)dimethylsilyl)-2-hydroxy-3-(2-phenyloxazol-5-yl)propanoate (C10)**

(C<sub>24</sub>H<sub>28</sub>BrNO<sub>4</sub>Si) 41.7 mg, 83% yield, 99% ee; Colorless oil; R<sub>f</sub> = 0.4 (petroleum ether/ethyl acetate = 7:1). [α]<sub>365</sub><sup>25</sup> = -12.6 (c = 0.46, in CH<sub>2</sub>Cl<sub>2</sub>). Dissolved in *i*-PrOH for UPC<sup>2</sup> (Daicel Chiralcel **OZ-3**, CO<sub>2</sub>/MeOH = 90/10, flow rate = 1.5 mL/min, λ = 254 nm), retention time: tr (minor) = 4.63 min, tr (major) = 7.44 min.

<sup>1</sup>H NMR (400 MHz, CDCl<sub>3</sub>) δ 7.99 – 7.91 (m, 2H), 7.56 – 7.45 (m, 4H), 7.44 – 7.37 (m, 3H), 6.91 (s, 1H), 3.37 – 3.18 (m, 2H), 3.10 (d, *J* = 15.2 Hz, 1H), 1.35 (s, 9H), 0.46 (s, 6H).

<sup>13</sup>C NMR (101 MHz, CDCl<sub>3</sub>) δ 175.4, 161.1, 148.5, 136.4, 133.4, 131.2, 130.2, 128.9, 127.7, 126.3, 126.3, 125.1, 83.2, 72.0, 32.1, 28.2, -5.2, -5.3.

**ESI-HRMS:** calcd for C<sub>24</sub>H<sub>29</sub><sup>79</sup>BrNO<sub>4</sub>Si<sup>+</sup> ([M + H]<sup>+</sup>) = 502.1044, found: 502.1041. C<sub>24</sub>H<sub>29</sub><sup>81</sup>BrNO<sub>4</sub>Si<sup>+</sup> ([M + H]<sup>+</sup>) = 504.1023, found: 504.1021.

**IR** (neat): 2923, 2360, 1713, 1572, 1370, 1252, 1370, 1154, 1067, 1011, 834, 804, 782, 713, 691 cm<sup>-1</sup>.

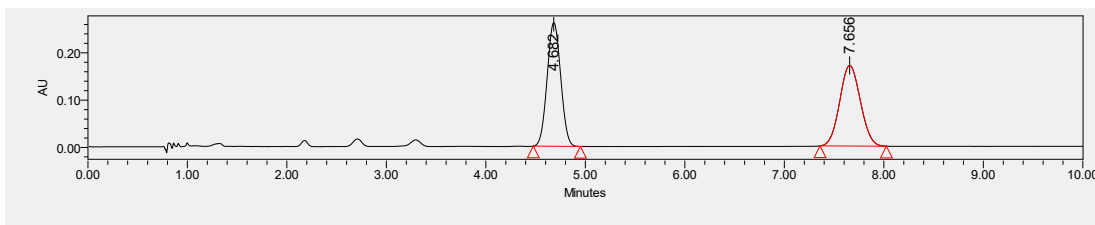

| Entry | Retention Time | Area    | % Area |
|-------|----------------|---------|--------|
| 1     | 4.682          | 2470448 | 50.14  |
| 2     | 7.656          | 2456173 | 49.86  |

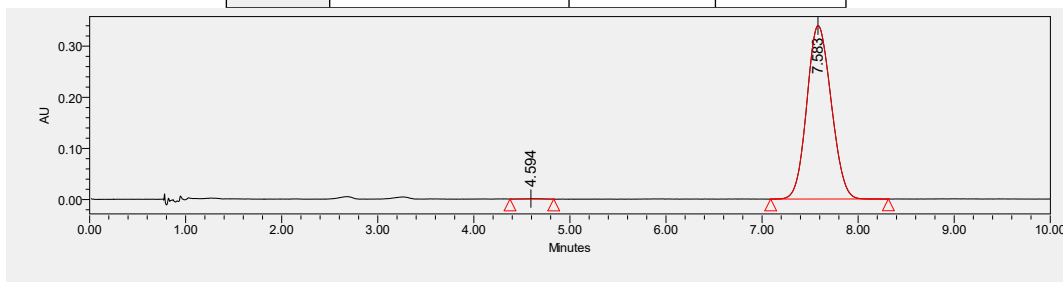

| Entry | Retention Time | Area    | % Area |
|-------|----------------|---------|--------|
| 1     | 4.594          | 8824    | 0.15   |
| 2     | 7.583          | 5981474 | 99.85  |

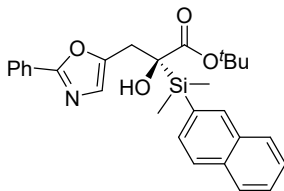

**Tert-butyl (R)-2-(dimethyl(naphthalen-2-yl)silyl)-2-hydroxy-3-(2-phenyloxazol-5-yl)propanoate (C11)**

(C<sub>28</sub>H<sub>31</sub>NO<sub>4</sub>Si) 38.8 mg, 82% yield, 99% ee; Colorless oil; R<sub>f</sub> = 0.4 (petroleum ether/ethyl acetate = 7:1). [α]<sub>D</sub><sup>24</sup> = -5.1 (c = 0.97, in CH<sub>2</sub>Cl<sub>2</sub>). Dissolved in *i*-PrOH for UPC<sup>2</sup> (Daicel Chiralpak AY-3, CO<sub>2</sub>/MeOH = 90/10, flow rate = 1.5 mL/min, λ = 254 nm), retention time: t<sub>r</sub> (major) = 7.50 min, t<sub>r</sub> (minor) = 5.14 min.

<sup>1</sup>H NMR (400 MHz, CDCl<sub>3</sub>) δ 8.14 – 8.07 (m, 1H), 8.00 – 7.91 (m, 2H), 7.89 – 7.81 (m, 3H), 7.71 (dd, *J* = 8.4, 1.2 Hz, 1H), 7.55 – 7.48 (m, 2H), 7.42 – 7.36 (m, 3H), 6.92 (s, 1H), 3.38 – 3.25 (m, 2H), 3.17 (d, *J* = 15.6 Hz, 1H), 1.33 (s, 9H), 0.58 (d, *J* = 2.4 Hz, 6H).

<sup>13</sup>C NMR (101 MHz, CDCl<sub>3</sub>) δ 175.6, 161.0, 148.8, 135.9, 134.2, 132.9, 132.1, 130.7, 130.1, 128.8, 128.3, 127.9, 127.7, 127.2, 126.9, 126.2, 126.2, 83.0, 72.3, 32.1, 28.2, -5.1, -5.2.

**ESI-HRMS:** calcd for C<sub>28</sub>H<sub>32</sub>NO<sub>4</sub>Si<sup>+</sup> ([M + H]<sup>+</sup>) = 474.2095, found: 474.2092.

**IR** (neat): 2975, 1708, 1592, 1548, 1482, 1368, 1250, 1154, 1085, 953, 857, 806, 780, 743, 712, 691 cm<sup>-1</sup>.

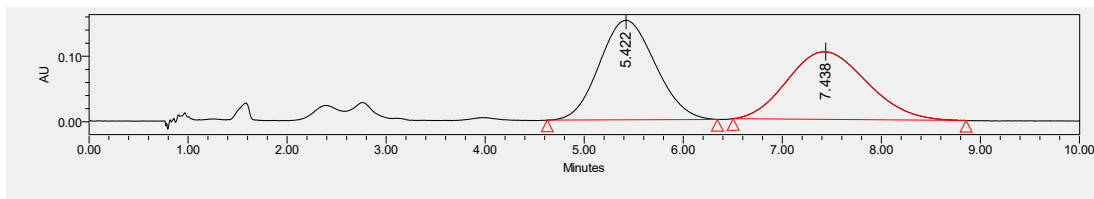

| Entry | Retention Time | Area    | % Area |
|-------|----------------|---------|--------|
| 1     | 5.422          | 5953886 | 50.83  |
| 2     | 7.438          | 5759733 | 49.17  |

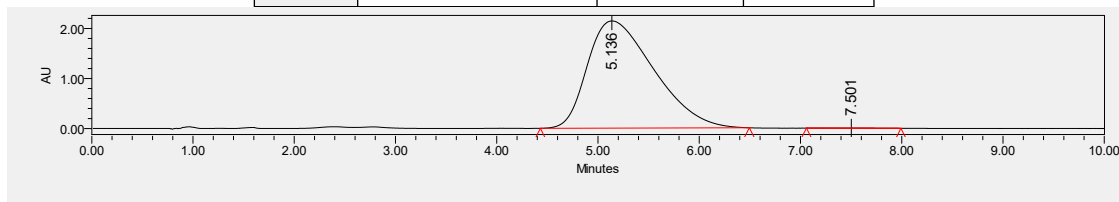

| Entry | Retention Time | Area     | % Area |
|-------|----------------|----------|--------|
| 1     | 5.136          | 97536583 | 99.93  |
| 2     | 7.501          | 73112    | 0.07   |

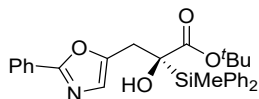

**Tert-butyl (*R*)-2-hydroxy-2-(methylphenylsilyl)-3-(2-phenyloxazol-5-yl)propanoate (C12)**

(C<sub>29</sub>H<sub>31</sub>NO<sub>4</sub>Si) 35.6 mg, 73% yield, 29% ee; Colorless oil; R<sub>f</sub> = 0.4 (petroleum ether/ethyl acetate = 7:1). [α]<sub>D</sub><sup>23</sup> = +2.6 (c = 0.89, in CH<sub>2</sub>Cl<sub>2</sub>). Dissolved in *i*-PrOH for HPLC (Daicel Chiralcel **OZH**, *i*-PrOH/*n*-hexane = 20/80, flow rate = 1.0 mL/min, λ = 254 nm), retention time: tr (major) = 5.02 min, tr (minor) = 4.16 min.

<sup>1</sup>H NMR (600 MHz, CDCl<sub>3</sub>) δ 7.97 – 7.89 (m, 2H), 7.78 – 7.70 (m, 4H), 7.45 – 7.37 (m, 9H), 6.91 (s, 1H), 3.42 (s, 1H), 3.38 (d, *J* = 10.4 Hz, 1H), 3.26 (d, *J* = 10.4 Hz, 1H), 1.21 (s, 9H), 0.80 (s, 3H).

<sup>13</sup>C NMR (151 MHz, CDCl<sub>3</sub>) δ 175.4, 161.1, 148.5, 135., 133.4, 133.0, 130.2, 130.1, 128.8, 128.1, 128.1, 127.7, 126.4, 126.3, 83.2, 72.6, 32.9, 27.9, -5.5.

**ESI-HRMS:** calcd for C<sub>29</sub>H<sub>32</sub>NO<sub>4</sub>Si<sup>+</sup> ([M + H]<sup>+</sup>) = 486.2095, found: 486.2094.

**IR** (neat): 2917, 1745, 1549, 1483, 1428, 1368, 1255, 1118, 793, 736, 698 cm<sup>-1</sup>.

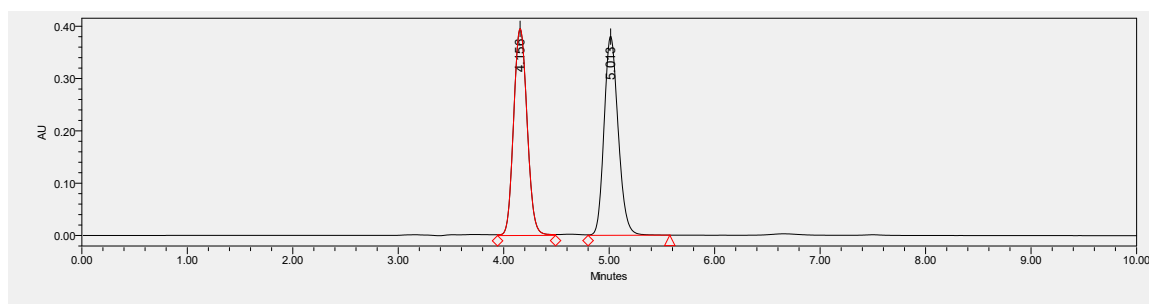

| Entry | Retention Time | Area    | % Area |
|-------|----------------|---------|--------|
| 1     | 4.156          | 3514660 | 49.93  |
| 2     | 5.013          | 3524187 | 50.07  |

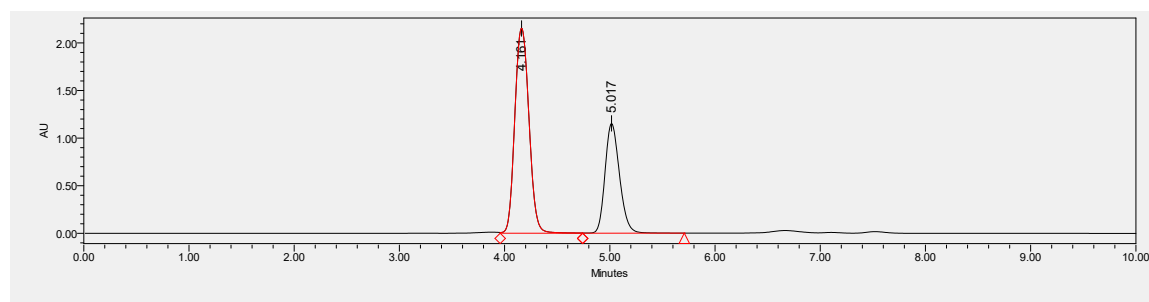

| Entry | Retention Time | Area     | % Area |
|-------|----------------|----------|--------|
| 1     | 4.161          | 20142056 | 64.71  |
| 2     | 5.017          | 10985070 | 35.29  |



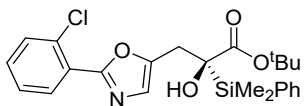

**Tert-butyl (R)-3-(2-(2-chlorophenyl)oxazol-5-yl)-2-(dimethyl(phenyl)silyl)-2-hydroxypropanoate (C13)**

(C<sub>24</sub>H<sub>28</sub>ClNO<sub>4</sub>Si) 34.8 mg, 76% yield, 96% ee; Colorless oil; R<sub>f</sub> = 0.4 (petroleum ether/ethyl acetate = 7:1). [α]<sub>D</sub><sup>27</sup> = -12.5 (c = 0.87, in CH<sub>2</sub>Cl<sub>2</sub>). Dissolved in *i*-PrOH for UPC<sup>2</sup> (Daicel Chiralcel **OZ-3**, CO<sub>2</sub>/MeOH = 90/10, flow rate = 1.5 mL/min, λ = 254 nm), retention time: tr (minor) = 3.95 min, tr (major) = 5.19 min.

<sup>1</sup>H NMR (400 MHz, CDCl<sub>3</sub>) δ 7.91 – 7.81 (m, 1H), 7.65 – 7.59 (m, 2H), 7.49 – 7.44 (m, 1H), 7.42 – 7.34 (m, 3H), 7.34 – 7.27 (m, 2H), 7.00 (s, 1H), 3.30 (d, *J* = 15.6 Hz, 1H), 3.24 (s, 1H), 3.14 (d, *J* = 15.2 Hz, 1H), 1.30 (s, 9H), 0.48 (d, *J* = 5.2 Hz, 6H).

<sup>13</sup>C NMR (101 MHz, CDCl<sub>3</sub>) δ 175.4, 149.1, 134.7, 134.4, 132.2, 131.1, 130.7, 129.9, 127.8, 126.7, 126.0, 82.9, 72.0, 31.9, 27.9, -5.4, -5.4.

ESI-HRMS: calcd for C<sub>24</sub>H<sub>29</sub><sup>35</sup>ClNO<sub>4</sub>Si<sup>+</sup> ([M + H]<sup>+</sup>) = 458.1549, found: 458.1546. C<sub>24</sub>H<sub>29</sub><sup>37</sup>ClNO<sub>4</sub>Si<sup>+</sup> ([M + H]<sup>+</sup>) = 459.1582, found: 459.1573.

IR (neat): 2975, 1707, 1474, 1428, 1368, 1250, 1155, 1114, 1066, 955, 835, 811, 783, 736, 701, 654 cm<sup>-1</sup>.

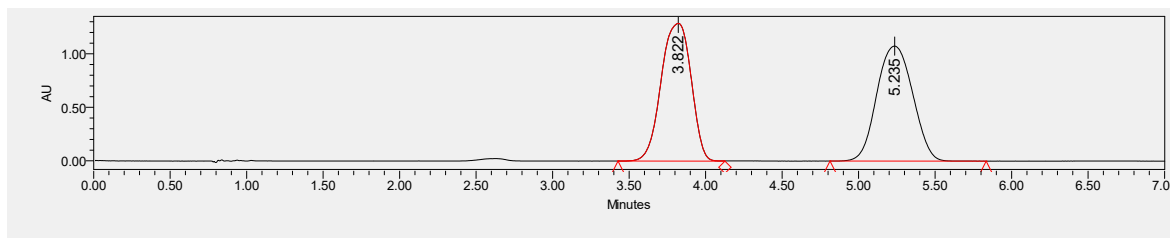

| Entry | Retention Time | Area     | % Area |
|-------|----------------|----------|--------|
| 1     | 3.822          | 17464410 | 50.16  |
| 2     | 5.235          | 17354240 | 49.84  |

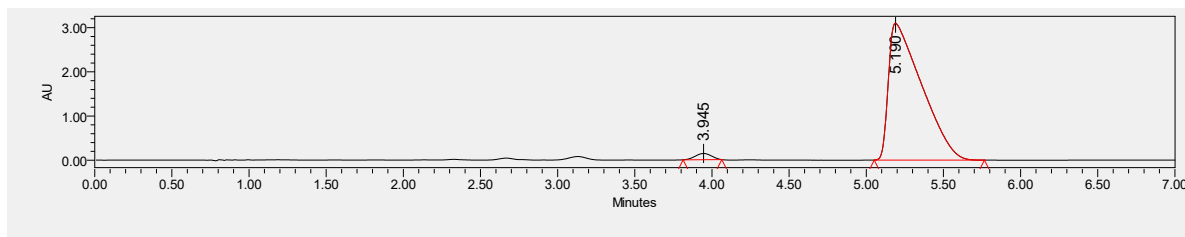

| Entry | Retention Time | Area     | % Area |
|-------|----------------|----------|--------|
| 1     | 3.945          | 1030393  | 2.18   |
| 2     | 5.190          | 46138656 | 97.82  |

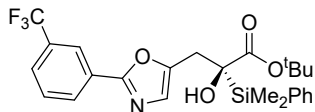

**Tert-butyl (R)-2-(dimethyl(phenyl)silyl)-2-hydroxy-3-(2-(3-(trifluoromethyl)phenyl)oxazol-5-yl)propanoate (C14)**

(C<sub>25</sub>H<sub>28</sub>F<sub>3</sub>NO<sub>4</sub>Si) 42.8 mg, 87% yield, 99% ee; Colorless oil; R<sub>f</sub> = 0.4 (petroleum ether/ethyl acetate = 7:1). [α]<sub>D</sub><sup>24</sup> = -1.9 (c = 1.07, in CH<sub>2</sub>Cl<sub>2</sub>). Dissolved in *i*-PrOH for HPLC (Daicel Chiralcel OZH, *i*-PrOH/*n*-hexane = 10/90, flow rate = 1.0 mL/min, λ = 254 nm), retention time: tr (minor) = 4.35 min, tr (major) = 5.14 min.

<sup>1</sup>H NMR (400 MHz, CDCl<sub>3</sub>) δ 8.24 – 8.17 (m, 1H), 8.14 (d, *J* = 7.6 Hz, 1H), 7.69 – 7.59 (m, 3H), 7.54 (t, *J* = 7.6 Hz, 1H), 7.45 – 7.31 (m, 3H), 6.95 (s, 1H), 3.30 (d, *J* = 15.2 Hz, 1H), 3.21 (s, 1H), 3.14 (d, *J* = 15.6 Hz, 1H), 1.35 (s, 9H), 0.49 (d, *J* = 3.2 Hz, 6H).

<sup>13</sup>C NMR (101 MHz, CDCl<sub>3</sub>) δ 175.6, 159.7, 149.6, 134.8, 134.4, 131.3, 130.1, 129.5, 129.3, 128.5, 128.0, 126.6, 126.6 (dd, *J* = 7.5, 3.7 Hz), 123.1 (dd, *J* = 7.9, 4.0 Hz), 122.6, 83.1, 72.0, 32.0, 28.2, -5.3, -5.3.

<sup>19</sup>F NMR (565 MHz, CDCl<sub>3</sub>) δ -62.89.

ESI-HRMS: calcd for C<sub>25</sub>H<sub>29</sub>F<sub>3</sub>NO<sub>4</sub>Si<sup>+</sup> ([M + H]<sup>+</sup>) = 492.1812, found: 492.1808.

IR (neat): 2076, 1712, 1426, 1369, 1325, 1250, 1155, 1126, 1066, 957, 835, 808, 783, 697, 654 cm<sup>-1</sup>.

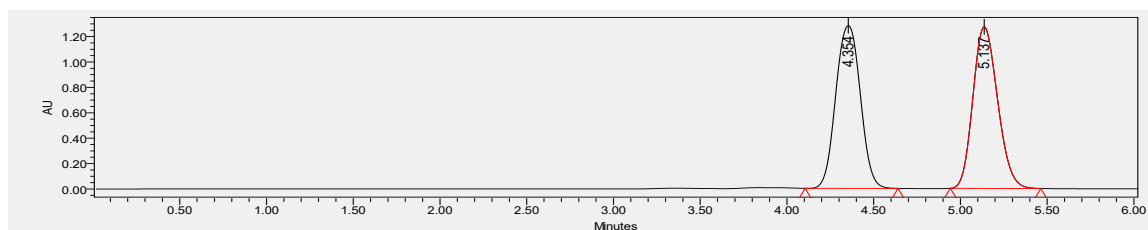

| Entry | Retention Time | Area     | % Area |
|-------|----------------|----------|--------|
| 1     | 4.354          | 12605323 | 50.11  |
| 2     | 5.137          | 12551818 | 49.89  |

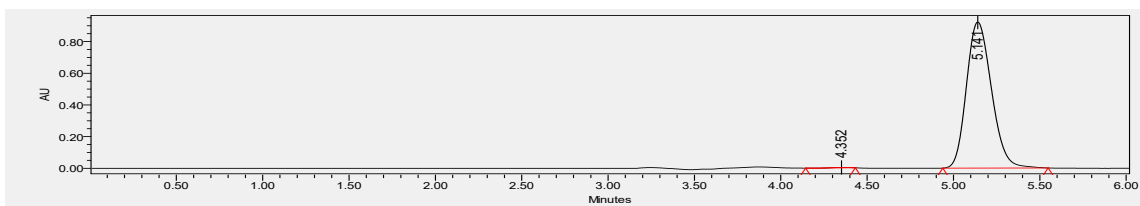

| Entry | Retention Time | Area    | % Area |
|-------|----------------|---------|--------|
| 1     | 4.352          | 22349   | 0.24   |
| 2     | 5.141          | 9270575 | 99.76  |

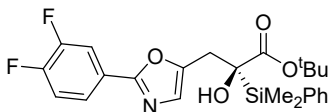

**Tert-butyl (R)-3-(2-(3,4-difluorophenyl)oxazol-5-yl)-2-(dimethyl(phenyl)silyl)-2-hydroxypropanoate (C15)**

(C<sub>24</sub>H<sub>27</sub>F<sub>2</sub>NO<sub>4</sub>Si) 39.5 mg, 86% yield, 99% ee; Colorless oil; R<sub>f</sub> = 0.4 (petroleum ether/ethyl acetate = 7:1). [α]<sub>D</sub><sup>26</sup> = -9.0 (c = 0.99, in CH<sub>2</sub>Cl<sub>2</sub>). Dissolved in *i*-PrOH for UPC<sup>2</sup> (Daicel Chiralcel **OZ-3**, CO<sub>2</sub>/MeOH = 95/5, flow rate = 1.5 mL/min, λ = 254 nm), retention time: tr (minor) = 2.83 min, tr (major) = 4.08 min.

<sup>1</sup>H NMR (400 MHz, CDCl<sub>3</sub>) δ 7.79 – 7.72 (m, 1H), 7.71 – 7.66 (m, 1H), 7.65 – 7.57 (m, 2H), 7.48 – 7.33 (m, 3H), 7.24 – 7.14 (m, 1H), 6.90 (s, 1H), 3.27 (d, *J* = 15.6 Hz, 1H), 3.21 (s, 1H), 3.12 (d, *J* = 15.6 Hz, 1H), 1.33 (s, 9H), 0.48 (d, *J* = 4.4 Hz, 6H).

<sup>13</sup>C NMR (101 MHz, CDCl<sub>3</sub>) δ 175.6, 159.1, 152.8 (d, *J* = 13.0 Hz), 151.9 (d, *J* = 13.1 Hz), 150.4 (d, *J* = 12.7 Hz), 149.5, 134.8, 134.4, 130.1, 128.0, 126.4, 122.7 (dd, *J* = 7.0, 3.8 Hz), 118.0 (d, *J* = 18.2 Hz), 115.5 (d, *J* = 19.6 Hz), 83.0, 72.1, 32.0, 28.2, -5.3, -5.3.

<sup>19</sup>F NMR (565 MHz, CDCl<sub>3</sub>) δ -134.88 (d, *J* = 22.0 Hz), -136.68 (d, *J* = 22.0 Hz).

ESI-HRMS: calcd for C<sub>24</sub>H<sub>28</sub>F<sub>2</sub>NO<sub>4</sub>Si<sup>+</sup> ([M + H]<sup>+</sup>) = 460.1750, found: 460.1748.

IR (neat): 2923, 1713, 1560, 1510, 1443, 1369, 1254, 1155, 1114, 1071, 961, 834, 776, 701 cm<sup>-1</sup>.

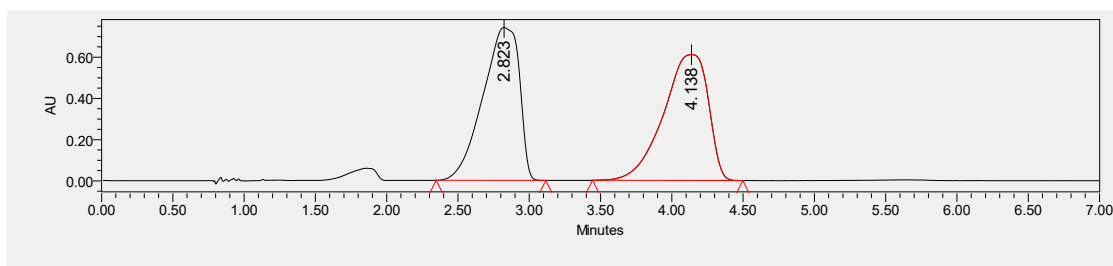

| Entry | Retention Time | Area     | % Area |
|-------|----------------|----------|--------|
| 1     | 2.823          | 13221097 | 49.80  |
| 2     | 4.138          | 13327646 | 50.20  |

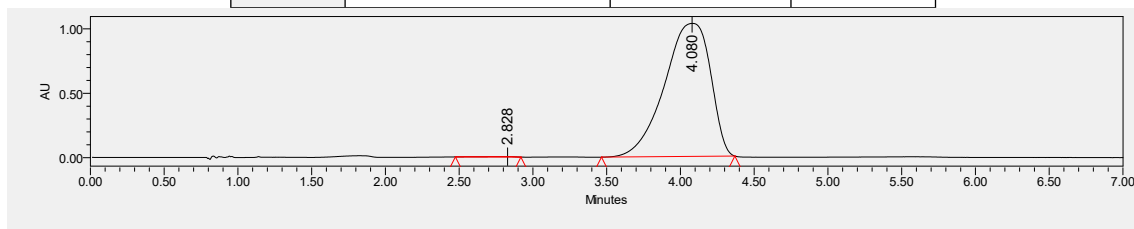

| Entry | Retention Time | Area     | % Area |
|-------|----------------|----------|--------|
| 1     | 2.828          | 56369    | 0.25   |
| 2     | 4.080          | 22415741 | 99.75  |

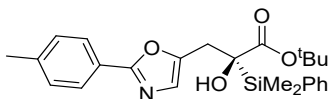

**Tert-butyl (*R*)-2-(dimethyl(phenyl)silyl)-2-hydroxy-3-(2-(*p*-tolyl)oxazol-5-yl)propanoate (C16)**

(C<sub>25</sub>H<sub>31</sub>NO<sub>4</sub>Si) 37.6 mg, 86% yield, 98% ee; Colorless oil; R<sub>f</sub> = 0.4 (petroleum ether/ethyl acetate = 7:1). [α]<sub>D</sub><sup>25</sup> = -8.7 (c = 0.94, in CH<sub>2</sub>Cl<sub>2</sub>). Dissolved in *i*-PrOH for UPC<sup>2</sup> (Daicel Chiralcel **OZ-3**, CO<sub>2</sub>/MeOH = 90/10, flow rate = 1.5 mL/min, λ = 254 nm), retention time: tr (minor) = 3.57 min, tr (major) = 4.98 min.

<sup>1</sup>H NMR (400 MHz, CDCl<sub>3</sub>) δ 7.84 (d, *J* = 8.0 Hz, 2H), 7.67 – 7.57 (m, 2H), 7.45 – 7.34 (m, 3H), 7.21 (d, *J* = 7.6 Hz, 2H), 6.89 (s, 1H), 3.27 (d, *J* = 15.2 Hz, 1H), 3.21 (s, 1H), 3.12 (d, *J* = 15.2 Hz, 1H), 2.38 (s, 3H), 1.32 (s, 9H), 0.48 (d, *J* = 6.8 Hz, 6H).

<sup>13</sup>C NMR (101 MHz, CDCl<sub>3</sub>) δ 175.6, 161.2, 148.4, 140.3, 134.8, 134.6, 130.0, 129.5, 128.0, 126.2, 126.0, 125.1, 82.9, 72.1, 32.0, 28.2, 21.6, -5.2, -5.3.

ESI-HRMS: calcd for C<sub>25</sub>H<sub>32</sub>NO<sub>4</sub>Si<sup>+</sup> ([M + H]<sup>+</sup>) = 438.2095, found:438.2090.

IR (neat): 2975, 1708, 1498, 1427, 1368, 1250, 1155, 1117, 1069, 955, 827, 783, 734, 701, 648 cm<sup>-1</sup>.

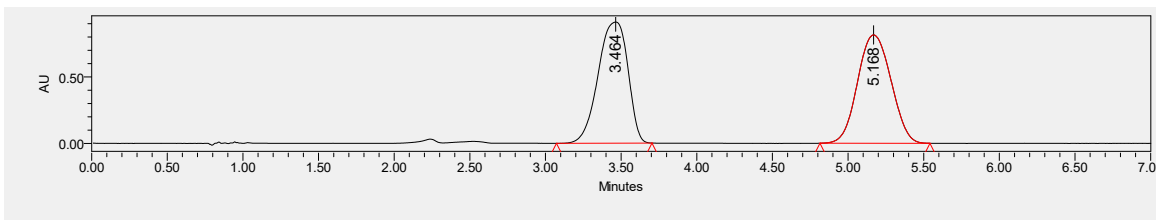

| Entry | Retention Time | Area     | % Area |
|-------|----------------|----------|--------|
| 1     | 3.464          | 12457869 | 49.93  |
| 2     | 5.168          | 12494010 | 50.07  |

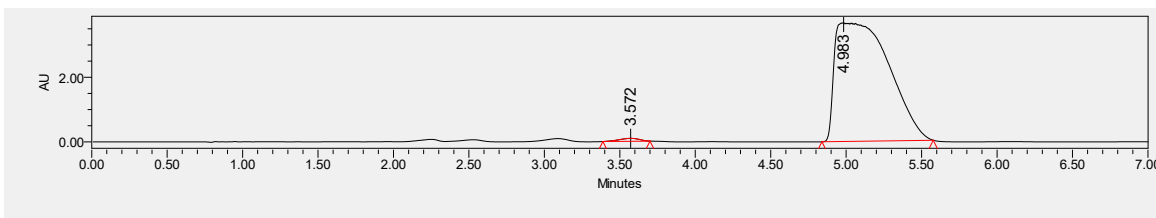

| Entry | Retention Time | Area     | % Area |
|-------|----------------|----------|--------|
| 1     | 3.572          | 838804   | 0.90   |
| 2     | 4.983          | 91868787 | 99.10  |

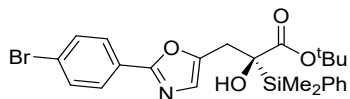

**Tert-butyl (R)-3-(2-(4-bromophenyl)oxazol-5-yl)-2-(dimethyl(phenyl)silyl)-2-hydroxypropanoate (C17)**

(C<sub>24</sub>H<sub>28</sub>BrNO<sub>4</sub>Si) 44.2 mg, 88% yield, 99% ee; Colorless oil; R<sub>f</sub> = 0.4 (petroleum ether/ethyl acetate = 7:1). [α]<sub>D</sub><sup>25</sup> = -9.0 (c = 1.10, in CH<sub>2</sub>Cl<sub>2</sub>). Dissolved in *i*-PrOH for UPC<sup>2</sup> (Daicel Chiralcel **OZ-3**, CO<sub>2</sub>/MeOH = 90/10, flow rate = 1.5 mL/min, λ = 254 nm), retention time: tr (minor) = 3.25 min, tr (major) = 4.60 min.

<sup>1</sup>H NMR (400 MHz, CDCl<sub>3</sub>) δ 7.87 – 7.76 (m, 2H), 7.69 – 7.58 (m, 2H), 7.57 – 7.49 (m, 2H), 7.46 – 7.33 (m, 3H), 6.91 (s, 1H), 3.27 (d, *J* = 15.6 Hz, 1H), 3.22 (s, 1H), 3.12 (d, *J* = 15.2 Hz, 1H), 1.32 (s, 9H), 0.48 (d, *J* = 4.8 Hz, 6H).

<sup>13</sup>C NMR (101 MHz, CDCl<sub>3</sub>) δ 175.5, 160.1, 149.2, 134.8, 134.5, 132.1, 130.1, 128.0, 127.7, 126.7, 126.3, 124.5, 83.0, 72.1, 32.0, 28.2, -5.3, -5.3.

ESI-HRMS: calcd for C<sub>24</sub>H<sub>29</sub><sup>79</sup>BrNO<sub>4</sub>Si<sup>+</sup> ([M + H]<sup>+</sup>) = 502.1044, found: 502.1041. C<sub>24</sub>H<sub>29</sub><sup>81</sup>BrNO<sub>4</sub>Si<sup>+</sup> ([M + H]<sup>+</sup>) = 504.1023, found: 504.1022.

IR (neat): 2975, 1710, 1604, 1479, 1427, 1401, 1368, 1250, 1154, 1071, 955, 834, 783, 733, 700 cm<sup>-1</sup>.

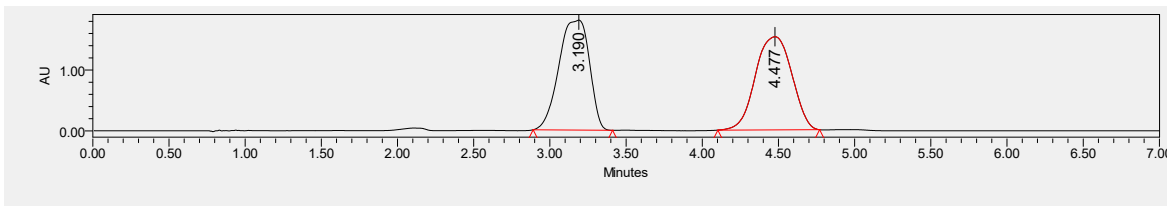

| Entry | Retention Time | Area     | % Area |
|-------|----------------|----------|--------|
| 1     | 3.190          | 25172390 | 49.77  |
| 2     | 4.477          | 25400224 | 50.23  |

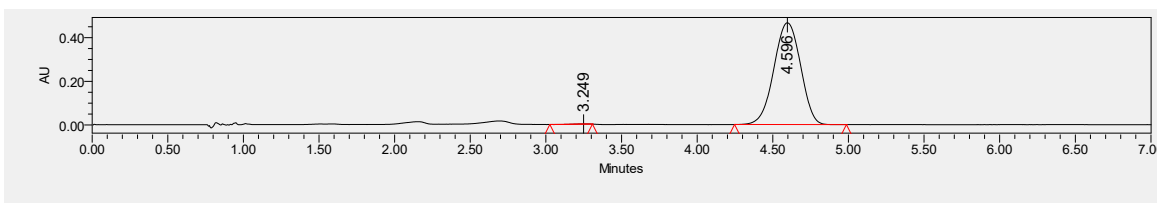

| Entry | Retention Time | Area    | % Area |
|-------|----------------|---------|--------|
| 1     | 3.249          | 8586    | 0.15   |
| 2     | 4.596          | 5713714 | 99.85  |

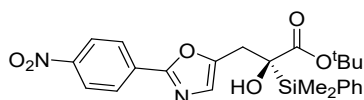

**Tert-butyl (R)-2-(dimethyl(phenyl)silyl)-2-hydroxy-3-(2-(4-nitrophenyl)oxazol-5-yl)propanoate (C18)**

(C<sub>24</sub>H<sub>28</sub>N<sub>2</sub>O<sub>6</sub>Si) 38.9 mg, 83% yield, 98% ee; Light yellow solid, mp: 107-111 °C; R<sub>f</sub> = 0.4 (petroleum ether/ethyl acetate = 7:1). [α]<sub>D</sub><sup>25</sup> = -13.1 (c = 0.97, in CH<sub>2</sub>Cl<sub>2</sub>). Dissolved in *i*-PrOH for UPC<sup>2</sup> (Daicel Chiralcel OZ-3, CO<sub>2</sub>/MeOH = 90/10, flow rate = 1.5 mL/min, λ = 254 nm), retention time: tr (minor) = 4.77 min, tr (major) = 5.99 min.

<sup>1</sup>H NMR (400 MHz, CDCl<sub>3</sub>) δ 8.32 – 8.22 (m, 2H), 8.14 – 8.15 (m, 2H), 7.66 – 7.58 (m, 2H), 7.47 – 7.33 (m, 3H), 7.03-6.97 (m, 1H), 3.30 (d, *J* = 15.2 Hz, 1H), 3.23 (s, 1H), 3.15 (d, *J* = 15.6 Hz, 1H), 1.34 (s, 9H), 0.49 (d, *J* = 2.4 Hz, 6H).

<sup>13</sup>C NMR (101 MHz, CDCl<sub>3</sub>) δ 175.5, 158.9, 150.8, 148.5, 134.8, 134.3, 133.1, 130.2, 128.0, 127.2, 126.9, 124.3, 83.2, 72.1, 32.0, 28.2, -5.3, -5.3.

ESI-HRMS: calcd for C<sub>24</sub>H<sub>29</sub>N<sub>2</sub>O<sub>6</sub>Si<sup>+</sup> ([M + H]<sup>+</sup>) = 469.1789, found: 469.1786.

IR (neat): 2975, 1709, 1520, 1427, 1337, 1251, 1154, 1110, 1063, 955, 836, 811, 784, 737, 714 cm<sup>-1</sup>.

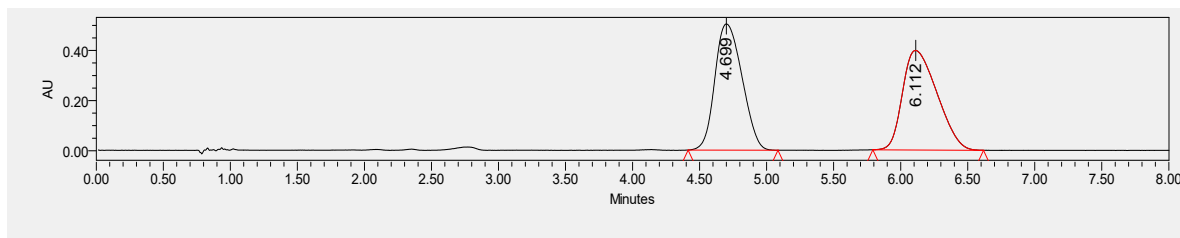

| Entry | Retention Time | Area    | % Area |
|-------|----------------|---------|--------|
| 1     | 4.699          | 7100273 | 50.03  |
| 2     | 6.112          | 7091262 | 49.97  |

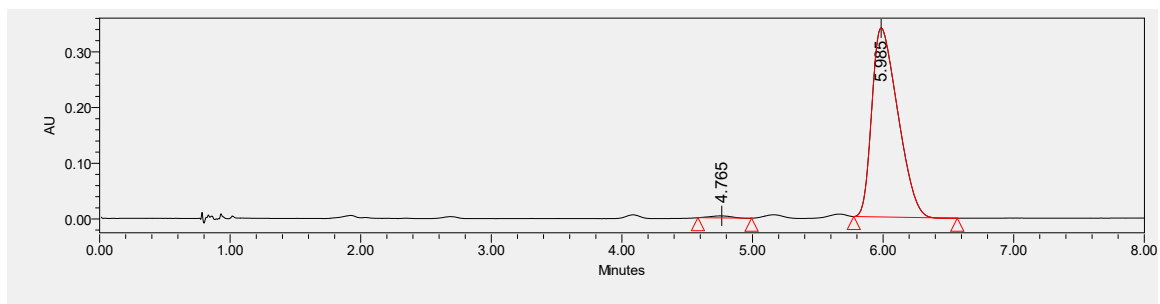

| Entry | Retention Time | Area    | % Area |
|-------|----------------|---------|--------|
| 1     | 4.765          | 40933   | 0.87   |
| 2     | 5.985          | 4680981 | 99.13  |

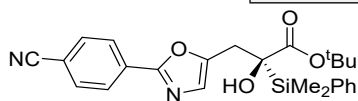

***Tert*-butyl (*R*)-3-(2-(4-cyanophenyl)oxazol-5-yl)-2-(dimethyl(phenyl)silyl)-2-hydroxypropanoate (C19)**

(C<sub>25</sub>H<sub>28</sub>N<sub>2</sub>O<sub>4</sub>Si) 42.6 mg, 95% yield, 99% ee; Colorless oil; R<sub>f</sub> = 0.4 (petroleum ether/ethyl acetate = 7:1). [α]<sub>D</sub><sup>24</sup> = -8.4 (c = 1.06, in CH<sub>2</sub>Cl<sub>2</sub>). Dissolved in *i*-PrOH for UPC<sup>2</sup> (Daicel Chiralcel **OZ-3**, CO<sub>2</sub>/MeOH = 90/10, flow rate = 1.5 mL/min, λ = 254 nm), retention time: tr (minor) = 4.16 min, tr (major) = 5.34 min.

<sup>1</sup>H NMR (400 MHz, CDCl<sub>3</sub>) δ 8.08 – 8.00 (m, 2H), 7.74 – 7.67 (m, 2H), 7.66 – 7.57 (m, 2H), 7.45 – 7.34 (m, 3H), 6.99 – 6.95 (m, 1H), 3.29 (d, *J* = 15.6 Hz, 1H), 3.21 (s, 1H), 3.14 (d, *J* = 15.6 Hz, 1H), 1.33 (s, 9H), 0.48 (d, *J* = 2.8 Hz, 6H).

<sup>13</sup>C NMR (101 MHz, CDCl<sub>3</sub>) δ 175.5, 159.2, 150.4, 134.8, 134.4, 132.7, 131.5, 130.1, 128.0, 127.0, 126.6, 118.6, 113.4, 83.1, 72.2, 32.0, 28.2, -5.3, -5.3.

ESI-HRMS: calcd for C<sub>25</sub>H<sub>29</sub>N<sub>2</sub>O<sub>4</sub>Si<sup>+</sup> ([M + H]<sup>+</sup>) = 449.1891, found: 449.1889.

IR (neat): 2976, 2228, 1711, 1592, 1490, 1427, 1369, 1251, 1155, 1069, 840, 784, 740, 702, 552 cm<sup>-1</sup>.

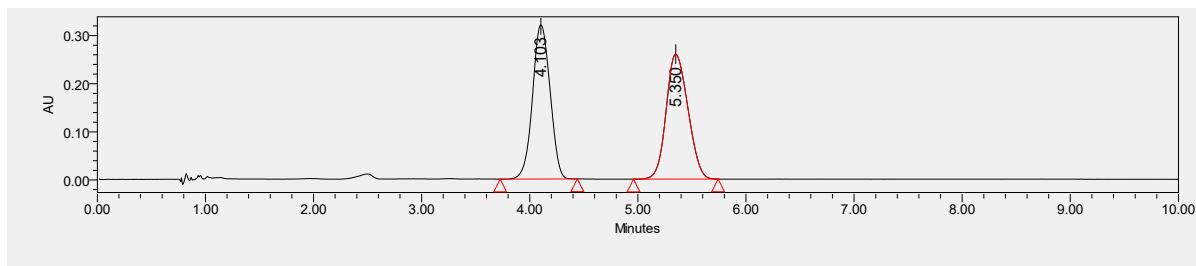

| Entry | Retention Time | Area    | % Area |
|-------|----------------|---------|--------|
| 1     | 4.103          | 3617325 | 49.92  |
| 2     | 5.350          | 3629564 | 50.08  |

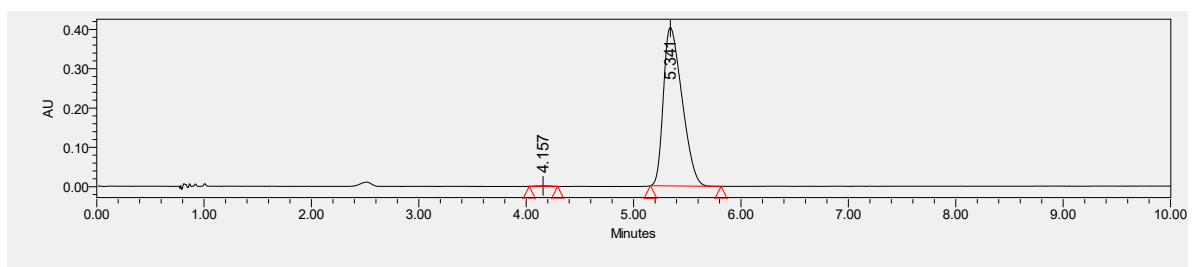

| Entry | Retention Time | Area    | % Area |
|-------|----------------|---------|--------|
| 1     | 4.157          | 9321    | 0.19   |
| 2     | 5.341          | 4860305 | 99.81  |

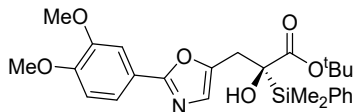

**Tert-butyl (*R*)-3-(2-(3,4-dimethoxyphenyl)oxazol-5-yl)-2-(dimethyl(phenyl)silyl)-2-hydroxypropanoate (C20)**

(C<sub>26</sub>H<sub>33</sub>NO<sub>6</sub>Si) 44.0 mg, 91% yield, 99% ee; Light yellow solid, mp: 78-82 °C; R<sub>f</sub> = 0.4 (petroleum ether/ethyl acetate = 2:1). [α]<sub>436</sub><sup>26</sup> = -2.4 (c = 1.20, in CH<sub>2</sub>Cl<sub>2</sub>). Dissolved in *i*-PrOH for **UPC<sup>2</sup>** (Daicel Chiralcel **OZ-3**, CO<sub>2</sub>/MeOH = 90/10, flow rate = 1.5 mL/min, λ = 254 nm), retention time: tr (minor) = 5.84 min, tr (major) = 8.20 min.

**<sup>1</sup>H NMR** (400 MHz, CDCl<sub>3</sub>) δ 7.66 – 7.59 (m, 2H), 7.53 (dd, *J* = 8.4, 2.0 Hz, 1H), 7.48 (d, *J* = 2.0 Hz, 1H), 7.45 – 7.34 (m, 3H), 6.90 (s, 1H), 6.88 (s, 1H), 3.94 (s, 3H), 3.92 (s, 3H), 3.28 (d, *J* = 15.6 Hz, 1H), 3.21 (s, 1H), 3.12 (d, *J* = 15.6 Hz, 1H), 1.33 (s, 9H), 0.49 (d, *J* = 6.4 Hz, 6H).

**<sup>13</sup>C NMR** (101 MHz, CDCl<sub>3</sub>) δ 175.6, 161.1, 150.8, 149.2, 148.3, 134.8, 134.6, 130.1, 128.0, 126.0, 120.8, 119.4, 111.1, 109.0, 82.9, 72.1, 56.2, 56.1, 32.1, 28.2, -5.2, -5.3.

**ESI-HRMS**: calcd for C<sub>26</sub>H<sub>34</sub>NO<sub>6</sub>Si<sup>+</sup> ([M + H]<sup>+</sup>) = 484.2150, found: 484.2148.

**IR** (neat): 2971, 1717, 1603, 1553, 1502, 1425, 1368, 1269, 1248, 1152, 1025, 813, 784, 702, 646 cm<sup>-1</sup>.

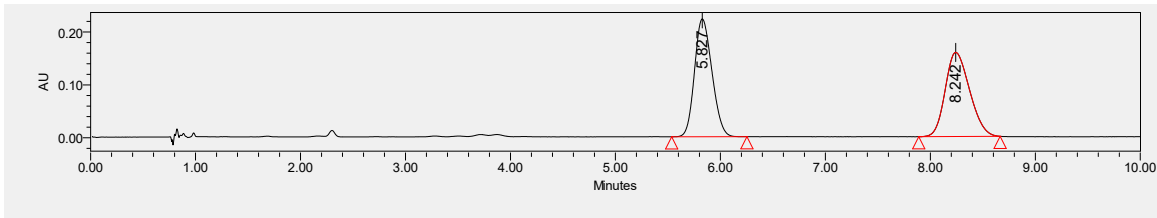

| Entry | Retention Time | Area    | % Area |
|-------|----------------|---------|--------|
| 1     | 5.827          | 2573439 | 50.16  |
| 2     | 8.242          | 2557072 | 49.84  |

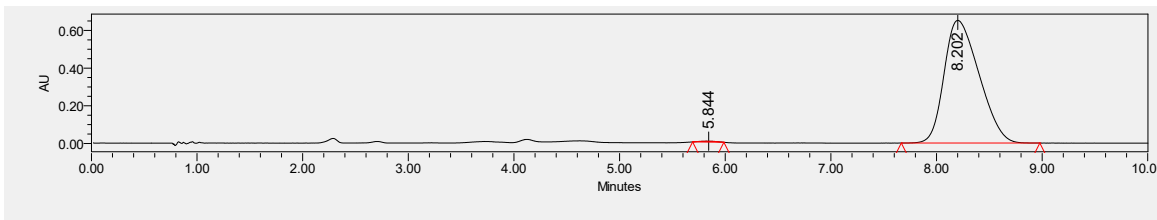

| Entry | Retention Time | Area     | % Area |
|-------|----------------|----------|--------|
| 1     | 5.844          | 53583    | 0.36   |
| 2     | 8.202          | 14951457 | 99.64  |



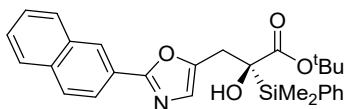

**Tert-butyl (R)-2-(dimethyl(phenyl)silyl)-2-hydroxy-3-(2-(naphthalen-2-yl)oxazol-5-yl)propanoate (C21)**

(C<sub>28</sub>H<sub>31</sub>NO<sub>4</sub>Si) 39.3 mg, 83% yield, 99% ee; Colorless oil; R<sub>f</sub> = 0.4 (petroleum ether/ethyl acetate = 7:1). [α]<sub>D</sub><sup>25</sup> = -3.6 (c = 0.98, in CH<sub>2</sub>Cl<sub>2</sub>). Dissolved in *i*-PrOH for UPC<sup>2</sup> (Daicel Chiralcel **OZ-3**, CO<sub>2</sub>/MeOH = 90/10, flow rate = 1.5 mL/min, λ = 254 nm), retention time: tr (minor) = 6.24 min, tr (major) = 9.73 min.

<sup>1</sup>H NMR (400 MHz, CDCl<sub>3</sub>) δ 8.44 (s, 1H), 8.06 (dd, *J* = 8.4, 1.6 Hz, 1H), 7.92 – 7.86 (m, 2H), 7.86 – 7.81 (m, 1H), 7.70 – 7.60 (m, 2H), 7.56 – 7.48 (m, 2H), 7.46 – 7.34 (m, 3H), 6.97 (s, 1H), 3.33 (d, *J* = 15.6 Hz, 1H), 3.26 (s, 1H), 3.17 (d, *J* = 15.2 Hz, 1H), 1.35 (s, 9H), 0.50 (d, *J* = 5.6 Hz, 6H).

<sup>13</sup>C NMR (101 MHz, CDCl<sub>3</sub>) δ 175.6, 161.2, 149.0, 134.8, 134.6, 134.1, 133.2, 130.1, 128.8, 128.7, 128.0, 127.2, 126.8, 126.4, 126.0, 125.1, 123.4, 83.0, 72.2, 32.1, 28.2, -5.2, -5.3.

ESI-HRMS: calcd for C<sub>28</sub>H<sub>32</sub>NO<sub>4</sub>Si<sup>+</sup> ([M + H]<sup>+</sup>) = 474.2095, found: 474.2095.

IR (neat): 2924, 1712, 1592, 1459, 1369, 1252, 1155, 1118, 1070, 960, 834, 784, 754, 701 cm<sup>-1</sup>.

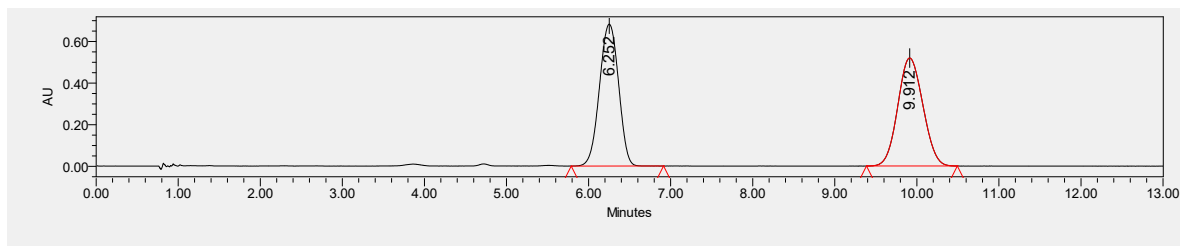

| Entry | Retention Time | Area     | % Area |
|-------|----------------|----------|--------|
| 1     | 6.252          | 11003093 | 49.99  |
| 2     | 9.912          | 11006018 | 50.01  |

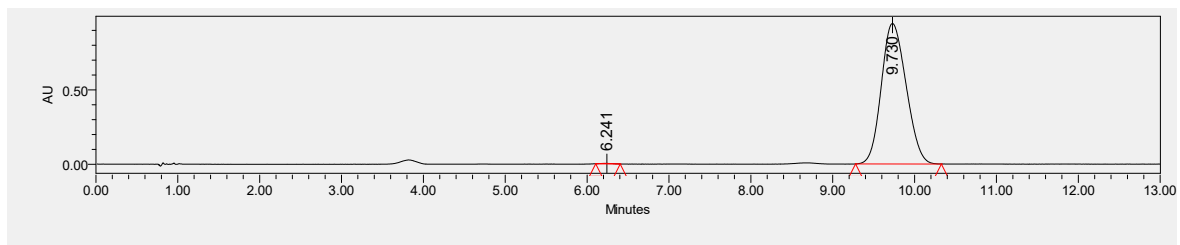

| Entry | Retention Time | Area     | % Area |
|-------|----------------|----------|--------|
| 1     | 6.241          | 31313    | 0.16   |
| 2     | 9.730          | 19841325 | 99.84  |

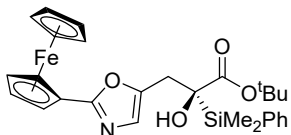

**Tert-butyl (*R*)-2-(dimethyl(phenyl)silyl)-2-hydroxy-3-(2-(Ferrocene)oxazol-5-yl)propanoate (C22)**  
 (C<sub>28</sub>H<sub>33</sub>FeNO<sub>4</sub>Si) 47.8 mg, 90% yield, 99% ee; Brown yellow oil; R<sub>f</sub> = 0.4 (petroleum ether/ethyl acetate = 5:1). [α]<sub>365</sub><sup>25</sup> = -19.7 (c = 0.21, in CH<sub>2</sub>Cl<sub>2</sub>). Dissolved in *i*-PrOH for HPLC (Daicel Chiralcel OZH, *i*-PrOH/*n*-hexane = 15/85, flow rate = 1.0 mL/min, λ = 254 nm), retention time: tr (minor) = 13.84 min, tr (major) = 15.47 min.

<sup>1</sup>H NMR (400 MHz, CDCl<sub>3</sub>) δ 7.69-7.60 (m, 2H), 7.46-7.34 (m, 3H), 6.77 (s, 1H), 4.82 (d, *J* = 6.4 Hz, 2H), 4.36-4.31 (m, 2H), 4.12 (s, 5H), 3.30-3.15 (m, 2H), 3.08 (d, *J* = 15.2 Hz, 1H), 1.37 (s, 9H), 0.49 (d, *J* = 8.0 Hz, 6H).

<sup>13</sup>C NMR (101 MHz, CDCl<sub>3</sub>) δ 175.7, 163.0, 147.5, 134.8, 134.7, 130.0, 128.0, 125.9, 82.8, 72.0, 71.4, 70.0, 70.0, 69.7, 67.4, 67.4, 32.1, 28.3, -5.2, -5.2.

ESI-HRMS: calcd for C<sub>28</sub>H<sub>34</sub>FeNO<sub>4</sub>Si<sup>+</sup> ([M + H]<sup>+</sup>) = 532.1601, found: 532.1604.

IR (neat): 2974, 1707, 1584, 1426, 1369, 1249, 1154, 1119, 1064, 957, 811, 700, 642 cm<sup>-1</sup>.

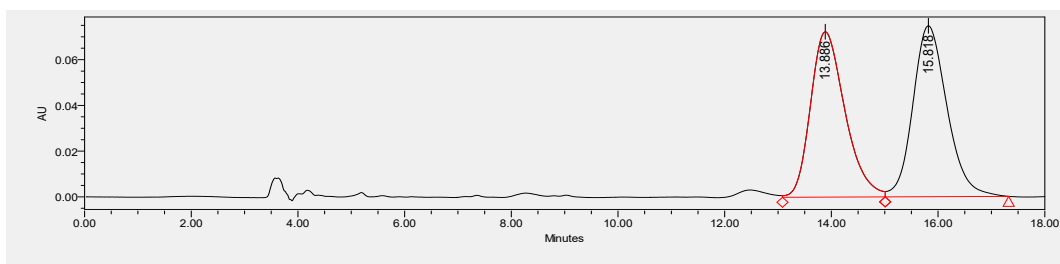

| Entry | Retention Time | Area    | % Area |
|-------|----------------|---------|--------|
| 1     | 13.886         | 3232057 | 49.34  |
| 2     | 15.818         | 3319158 | 50.66  |

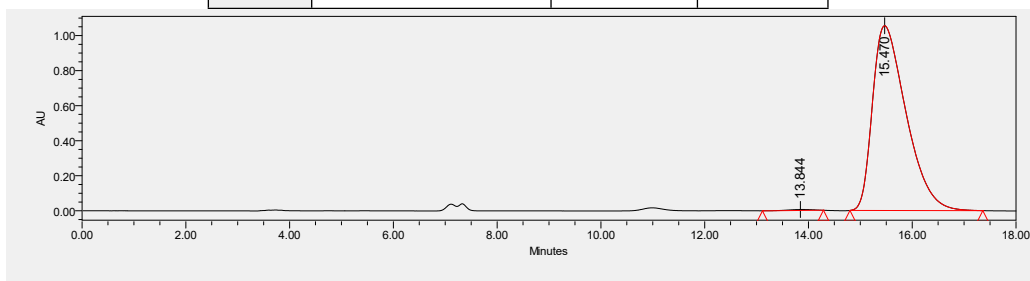

| Entry | Retention Time | Area     | % Area |
|-------|----------------|----------|--------|
| 1     | 13.844         | 177704   | 0.37   |
| 2     | 15.470         | 47418241 | 99.63  |

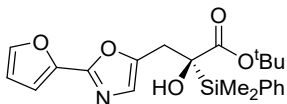

**Tert-butyl (R)-2-(dimethyl(phenyl)silyl)-3-(2-(furan-2-yl)oxazol-5-yl)-2-hydroxypropanoate (C23)**

(C<sub>22</sub>H<sub>27</sub>NO<sub>5</sub>Si) 33.0 mg, 80% yield, 98% ee; Colorless oil; R<sub>f</sub> = 0.4 (petroleum ether/ethyl acetate = 4:1). [α]<sub>D</sub><sup>25</sup> = -4.8 (c = 0.67, in CH<sub>2</sub>Cl<sub>2</sub>). Dissolved in *i*-PrOH for UPC<sup>2</sup> (Daicel Chiralcel **OZ-3**, CO<sub>2</sub>/MeOH = 90/10, flow rate = 1.5 mL/min, λ = 254 nm), retention time: tr (minor) = 3.10 min, tr (major) = 4.90 min.

<sup>1</sup>H NMR (400 MHz, CDCl<sub>3</sub>) δ 7.65 – 7.58 (m, 2H), 7.52 – 7.47 (m, 1H), 7.44 – 7.32 (m, 3H), 6.95 – 6.82 (m, 2H), 6.49 (dd, *J* = 3.6, 1.6 Hz, 1H), 3.26 (d, *J* = 15.6 Hz, 1H), 3.18 (s, 1H), 3.09 (d, *J* = 15.6 Hz, 1H), 1.35 (s, 9H), 0.47 (d, *J* = 4.0 Hz, 6H).

<sup>13</sup>C NMR (101 MHz, CDCl<sub>3</sub>) δ 175.5, 153.9, 148.3, 144.1, 143.3, 134.8, 134.5, 130.1, 128.0, 126.1, 111.9, 110.8, 83.1, 72.0, 31.9, 28.1, -5.3, -5.3.

ESI-HRMS: calcd for C<sub>22</sub>H<sub>28</sub>NO<sub>5</sub>Si<sup>+</sup> ([M + H]<sup>+</sup>) = 414.1731, found: 414.1727.

IR (neat): 2976, 1708, 1534, 1455, 1369, 1252, 1155, 1117, 1011, 955, 835, 812, 784, 740, 702 cm<sup>-1</sup>.

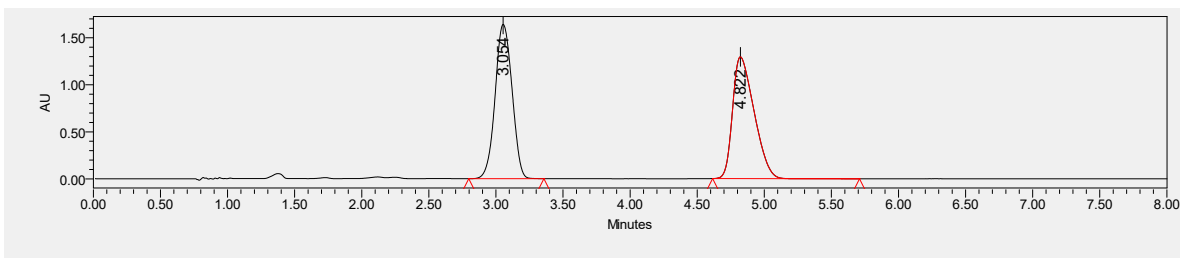

| Entry | Retention Time | Area     | % Area |
|-------|----------------|----------|--------|
| 1     | 3.054          | 14382942 | 50.01  |
| 2     | 4.822          | 14377393 | 49.99  |

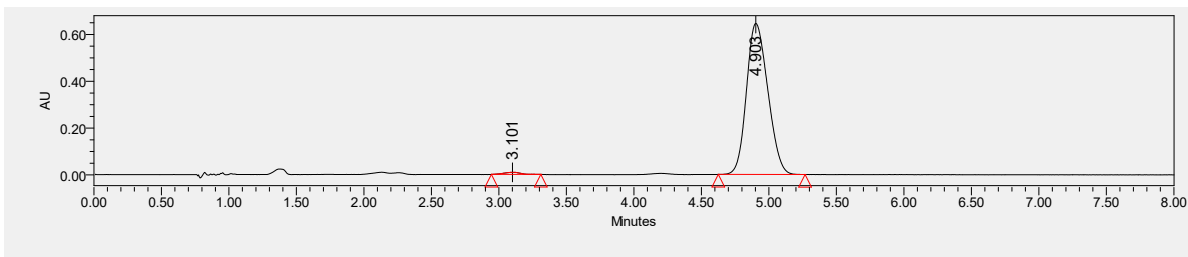

| Entry | Retention Time | Area    | % Area |
|-------|----------------|---------|--------|
| 1     | 3.101          | 74924   | 1.05   |
| 2     | 4.903          | 7084825 | 98.95  |

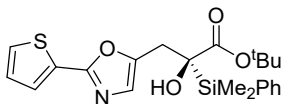

**Tert-butyl (R)-2-(dimethyl(phenyl)silyl)-2-hydroxy-3-(2-(thiophen-2-yl)oxazol-5-yl)propanoate (C24)**

(C<sub>22</sub>H<sub>27</sub>NO<sub>4</sub>SSi) 32.7 mg, 76% yield, 99% ee; Colorless oil; R<sub>f</sub> = 0.4 (petroleum ether/ethyl acetate = 7:1). [α]<sub>D</sub><sup>25</sup> = -1.4 (c = 0.83, in CH<sub>2</sub>Cl<sub>2</sub>). Dissolved in *i*-PrOH for UPC<sup>2</sup> (Daicel Chiralcel **OZ-3**, CO<sub>2</sub>/MeOH = 90/10, flow rate = 1.5 mL/min, λ = 254 nm), retention time: tr (minor) = 4.03 min, tr (major) = 6.82 min.

<sup>1</sup>H NMR (400 MHz, CDCl<sub>3</sub>) δ 7.66 – 7.60 (m, 2H), 7.55 (dd, *J* = 4.0, 1.6 Hz, 1H), 7.42 – 7.34 (m, 4H), 7.06 (dd, *J* = 4.8, 3.6 Hz, 1H), 6.88 – 6.83 (m, 1H), 3.26 (d, *J* = 15.2 Hz, 1H), 3.19 (s, 1H), 3.09 (d, *J* = 15.6 Hz, 1H), 1.34 (s, 9H), 0.48 (d, *J* = 4.8 Hz, 6H).

<sup>13</sup>C NMR (101 MHz, CDCl<sub>3</sub>) δ 175.5, 157.2, 148.2, 134.8, 134.5, 130.4, 130.1, 128.0, 127.9, 127.3, 126.2, 83.0, 72.0, 32.0, 28.2, -5.2, -5.3.

ESI-HRMS: calcd for C<sub>22</sub>H<sub>28</sub>NO<sub>4</sub>SSi<sup>+</sup> ([M + H]<sup>+</sup>) = 430.1503, found: 430.1504.

IR (neat): 2976, 1709, 1596, 1426, 1369, 1249, 1155, 1117, 1066, 954, 836, 811, 784, 724, 702 cm<sup>-1</sup>.

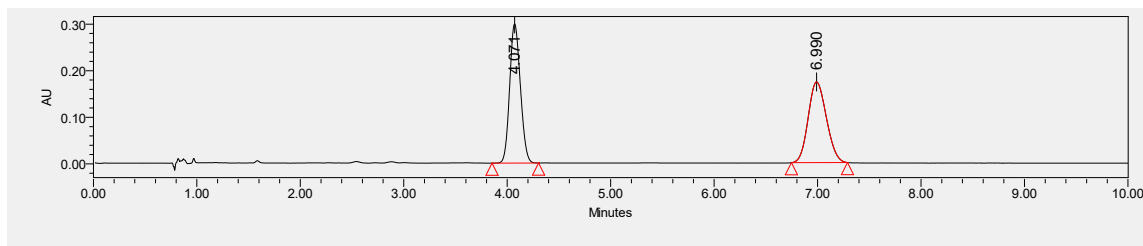

| Entry | Retention Time | Area    | % Area |
|-------|----------------|---------|--------|
| 1     | 4.071          | 2143798 | 50.33  |
| 2     | 6.990          | 2116017 | 49.67  |

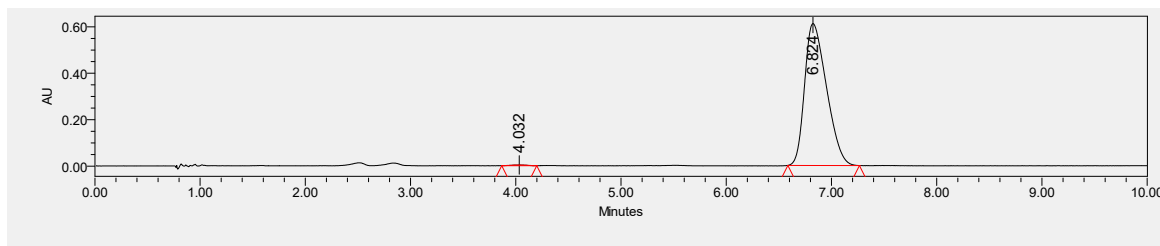

| Entry | Retention Time | Area    | % Area |
|-------|----------------|---------|--------|
| 1     | 4.032          | 27655   | 0.31   |
| 2     | 6.824          | 8824815 | 99.69  |

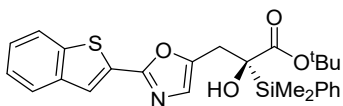

**Tert-butyl (R)-3-(2-(benzo[b]thiophen-2-yl)oxazol-5-yl)-2-(dimethyl(phenyl)silyl)-2-hydroxypropanoate (C25)**

(C<sub>26</sub>H<sub>29</sub>NO<sub>4</sub>SSi) 43.2 mg, 90% yield, 99% ee; white solid; mp: 94-98 °C; R<sub>f</sub> = 0.4 (petroleum ether/ethyl acetate = 7:1). [α]<sub>D</sub><sup>25</sup> = +0.9 (c = 1.08, in CH<sub>2</sub>Cl<sub>2</sub>). Dissolved in *i*-PrOH for UPC<sup>2</sup> (Daicel Chiralpak AD-3, CO<sub>2</sub>/MeOH = 80/20, flow rate = 1.5 mL/min, λ = 254 nm), retention time: tr (major) = 6.61 min, tr (minor) = 9.41 min.

<sup>1</sup>H NMR (400 MHz, CDCl<sub>3</sub>) δ 7.86 – 7.82 (m, 1H), 7.81 – 7.77 (m, 2H), 7.66 – 7.60 (m, 2H), 7.43 – 7.34 (m, 5H), 6.94 (s, 1H), 3.30 (d, *J* = 15.6 Hz, 1H), 3.24 (s, 1H), 3.13 (d, *J* = 15.2 Hz, 1H), 1.36 (s, 9H), 0.50 (d, *J* = 4.0 Hz, 6H).

<sup>13</sup>C NMR (101 MHz, CDCl<sub>3</sub>) δ 175.5, 157.1, 149.2, 140.4, 139.7, 134.8, 134.5, 130.1, 130.0, 128.0, 126.6, 125.8, 125.0, 124.6, 123.8, 122.6, 83.1, 72.1, 32.0, 28.2, -5.3, -5.3.

ESI-HRMS: calcd for C<sub>26</sub>H<sub>30</sub>NO<sub>4</sub>SSi<sup>+</sup> ([M + H]<sup>+</sup>) = 480.1659, found: 480.1657.

IR (neat): 2975, 1709, 1598, 1456, 1368, 1252, 1155, 1116, 1068, 835, 811, 784, 747, 702 cm<sup>-1</sup>.

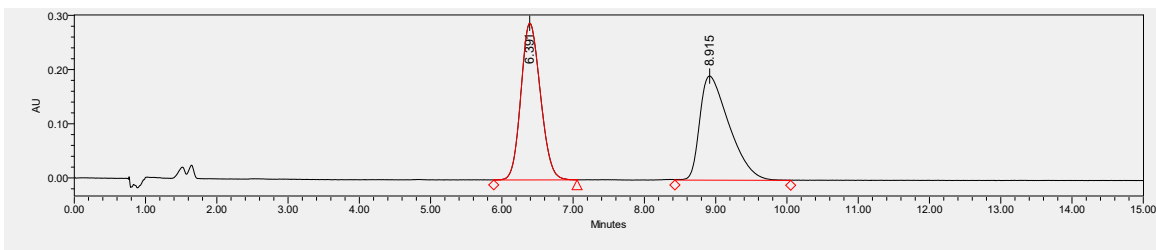

| Entry | Retention Time | Area    | % Area |
|-------|----------------|---------|--------|
| 1     | 6.391          | 5507392 | 50.05  |
| 2     | 8.915          | 5497137 | 49.95  |

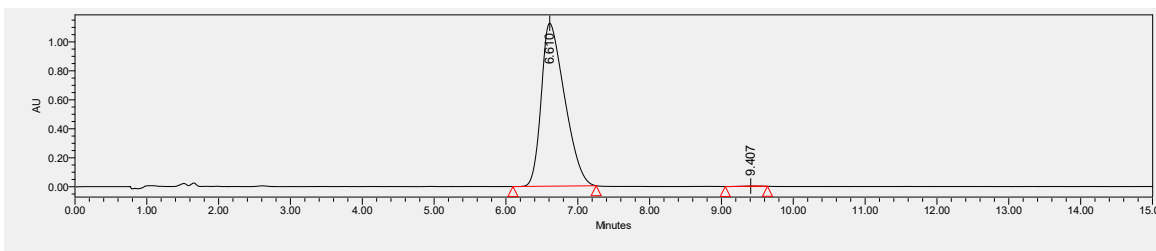

| Entry | Retention Time | Area     | % Area |
|-------|----------------|----------|--------|
| 1     | 6.610          | 25392529 | 99.87  |
| 2     | 9.407          | 34184    | 0.13   |

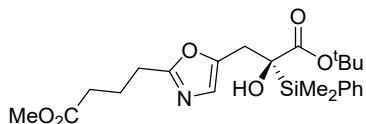

**Methyl (*R*)-4-(5-(3-(tert-butoxy)-2-(dimethyl(phenyl)silyl)-2-hydroxy-3-oxopropyl)oxazol-2-yl)butanoate (C26)**

(C<sub>23</sub>H<sub>33</sub>NO<sub>6</sub>Si) 21.9 mg, 49% yield, 88% ee; Colorless oil; R<sub>f</sub> = 0.4 (petroleum ether/ethyl acetate = 4:1). [α]<sub>D</sub><sup>23</sup> = -16.1 (c = 0.36, in CH<sub>2</sub>Cl<sub>2</sub>). Dissolved in *i*-PrOH for UPC<sup>2</sup> (Daicel Chiralcel **OZ-3**, CO<sub>2</sub>/MeOH = 95/5, flow rate = 1.5 mL/min, λ = 210 nm), retention time: tr (minor) = 4.67 min, tr (major) = 5.82 min.

<sup>1</sup>H NMR (400 MHz, CDCl<sub>3</sub>) δ 7.65 – 7.52 (m, 2H), 7.44 – 7.32 (m, 3H), 6.72-6.61 (m, 1H), 3.65 (s, 3H), 3.20-3.10 (m, 2H), 2.99 (d, *J* = 15.2 Hz, 1H), 2.71 (t, *J* = 7.2 Hz, 2H), 2.37 (t, *J* = 7.6 Hz, 2H), 2.08-1.98 (m, 2H), 1.34 (s, 9H), 0.45 (d, *J* = 5.6 Hz, 6H).

<sup>13</sup>C NMR (101 MHz, CDCl<sub>3</sub>) δ 175.6, 173.5, 163.2, 148.2, 134.8, 130.0, 127.9, 124.7, 82.9, 72.1, 51.8, 33.1, 31.9, 29.9, 28.1, 27.5, 22.3, -5.3, -5.3.

**ESI-HRMS:** calcd for C<sub>23</sub>H<sub>34</sub>NO<sub>6</sub>Si<sup>+</sup> ([M + H]<sup>+</sup>) = 448.2150, found: 448.2147.

**IR (neat):** 2927, 1737, 1568, 1430, 1369, 1252, 1155, 1113, 1067, 836, 812, 783, 737, 702 cm<sup>-1</sup>.

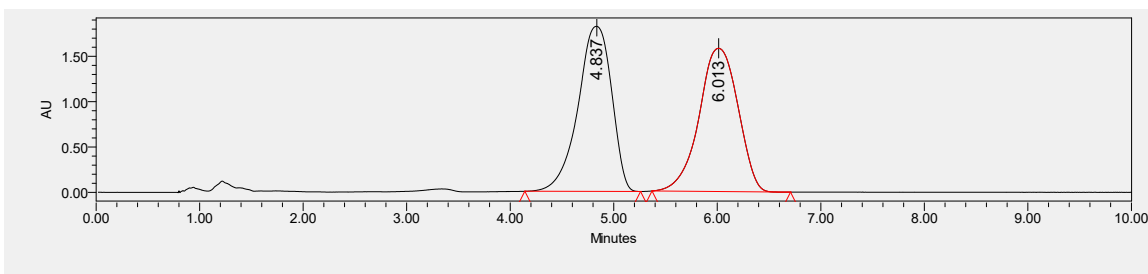

| Entry | Retention Time | Area     | % Area |
|-------|----------------|----------|--------|
| 1     | 4.837          | 41116409 | 49.93  |
| 2     | 6.013          | 41232818 | 50.07  |

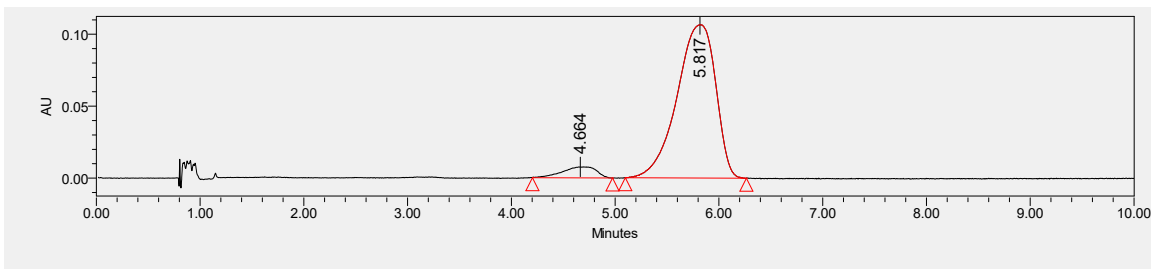

| Entry | Retention Time | Area    | % Area |
|-------|----------------|---------|--------|
| 1     | 4.664          | 175874  | 5.99   |
| 2     | 5.817          | 2762199 | 94.01  |

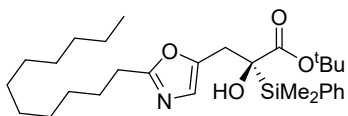

**Tert-butyl (*R*)-2-(dimethyl(phenyl)silyl)-2-hydroxy-3-(2-undecyloxazol-5-yl)propanoate (C27)**

(C<sub>29</sub>H<sub>47</sub>NO<sub>4</sub>Si) 20.1 mg, 40% yield, 90% ee; Colorless oil; R<sub>f</sub> = 0.4 (petroleum ether/ethyl acetate = 5:1). [α]<sub>D</sub><sup>25</sup> = -13.3 (c = 0.51, in CH<sub>2</sub>Cl<sub>2</sub>). Dissolved in *i*-PrOH for UPC<sup>2</sup> (Daicel Chiralcel **OZ-3**, CO<sub>2</sub>/MeOH = 95/5, flow rate = 1.5 mL/min, λ = 210 nm), retention time: tr (minor) = 4.05 min, tr (major) = 5.27 min.

<sup>1</sup>H NMR (400 MHz, CDCl<sub>3</sub>) δ 7.65 – 7.55 (m, 2H), 7.43-7.32 (m, 3H), 6.66 (s, 1H), 3.16 (d, *J* = 15.2 Hz, 1H), 2.99 (d, *J* = 15.6 Hz, 1H), 2.63 (t, *J* = 7.6 Hz, 2H), 1.73-1.63 (m, 3H), 1.34 (s, 9H), 1.29-1.22 (m, 15H), 0.89-0.84 (m, 3H), 0.45 (d, *J* = 6.4 Hz, 6H).

<sup>13</sup>C NMR (101 MHz, CDCl<sub>3</sub>) δ 175.6, 164.4, 147.8, 134.8, 134.7, 130.0, 127.9, 124.6, 82.8, 72.1, 32.1, 31.9, 29.8, 29.6, 29.5, 29.4, 29.3, 28.3, 28.1, 27.1, 22.9, 14.3, -5.3, -5.3.

**ESI-HRMS:** calcd for C<sub>29</sub>H<sub>48</sub>NO<sub>4</sub>Si<sup>+</sup> ([M + H]<sup>+</sup>) = 502.3347, found: 502.3339.

**IR** (neat): 2925, 1711, 1568, 1461, 1369, 1252, 1155, 1066, 967, 835, 811, 783, 736, 701 cm<sup>-1</sup>.

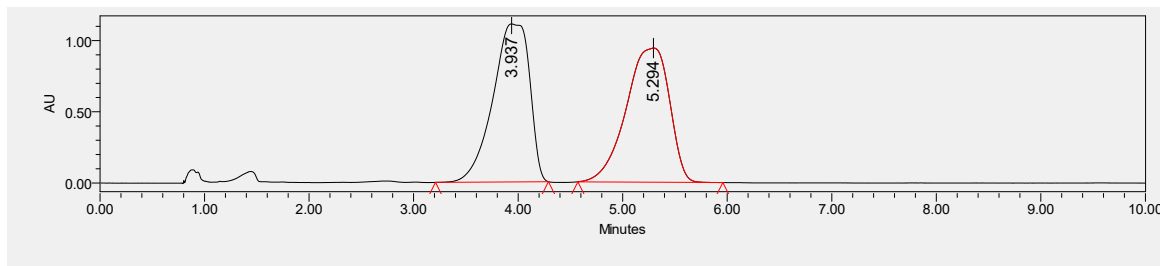

| Entry | Retention Time | Area     | % Area |
|-------|----------------|----------|--------|
| 1     | 3.937          | 27082412 | 50.00  |
| 2     | 5.294          | 27079061 | 50.00  |

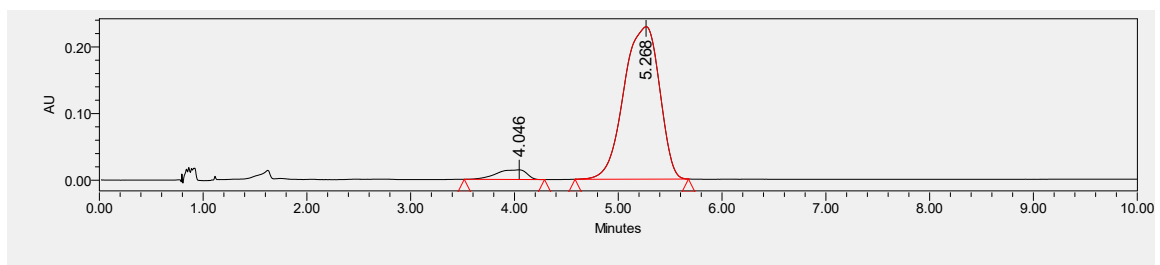

| Entry | Retention Time | Area    | % Area |
|-------|----------------|---------|--------|
| 1     | 4.046          | 294663  | 5.14   |
| 2     | 5.268          | 5437206 | 94.86  |

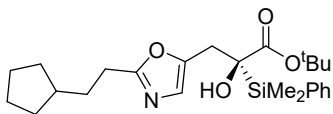

**Tert-butyl (*R*)-3-(2-(2-cyclopentylethyl)oxazol-5-yl)-2-(dimethyl(phenyl)silyl)-2-hydroxypropanoate (C28)**

(C<sub>25</sub>H<sub>37</sub>NO<sub>6</sub>Si) 19.5 mg, 44% yield, 94% ee; Colorless oil; R<sub>f</sub> = 0.4 (petroleum ether/ethyl acetate = 5:1). [α]<sub>D</sub><sup>24</sup> = -13.5 (c = 0.48, in CH<sub>2</sub>Cl<sub>2</sub>). Dissolved in *i*-PrOH for UPC<sup>2</sup> (Daicel Chiralcel **OZ-3**, CO<sub>2</sub>/MeOH = 95/5, flow rate = 1.5 mL/min, λ = 210 nm), retention time: tr (minor) = 4.44 min, tr (major) = 5.96 min.

<sup>1</sup>H NMR (400 MHz, CDCl<sub>3</sub>) δ 7.65 – 7.56 (m, 2H), 7.43 – 7.34 (m, 3H), 6.66 (s, 1H), 3.18-3.13 (d, *J* = 15.2, 1H), 3.12 (s, 1H), 2.99 (dd, *J* = 15.2, 0.8 Hz, 1H), 2.72 – 2.59 (m, 2H), 1.77 – 1.67 (m, 5H), 1.62 – 1.55 (m, 2H), 1.53 – 1.45 (m, 2H), 1.34 (s, 9H), 1.13 – 1.02 (m, 2H), 0.45 (d, *J* = 5.6 Hz, 6H).

<sup>13</sup>C NMR (101 MHz, CDCl<sub>3</sub>) δ 175.6, 164.5, 147.8, 134.8, 134.7, 130.0, 127.9, 124.6, 82.8, 72.1, 39.8, 33.4, 32.5, 31.9, 28.1, 27.6, 25.3, -5.2, -5.3.

ESI-HRMS: calcd for C<sub>25</sub>H<sub>38</sub>NO<sub>4</sub>Si<sup>+</sup> ([M + H]<sup>+</sup>) = 444.2565, found: 444.2557.

IR (neat): 2952, 1710, 1568, 1455, 1368, 1251, 1156, 1115, 1068, 969, 836, 812, 783, 735, 701 cm<sup>-1</sup>.

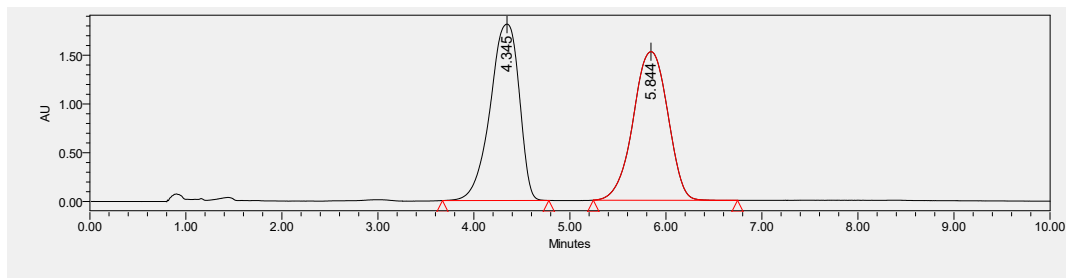

| Entry | Retention Time | Area     | % Area |
|-------|----------------|----------|--------|
| 1     | 4.345          | 38012897 | 49.92  |
| 2     | 5.844          | 38128163 | 50.08  |

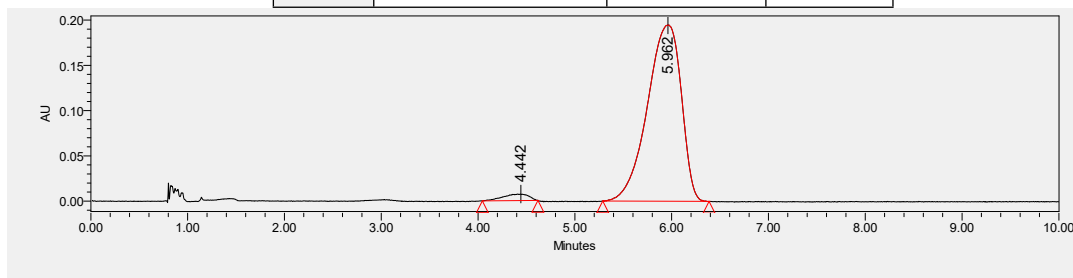

| Entry | Retention Time | Area    | % Area |
|-------|----------------|---------|--------|
| 1     | 4.442          | 134239  | 2.76   |
| 2     | 5.962          | 4737353 | 97.24  |



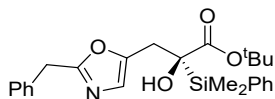

**Tert-butyl (*R*)-3-(2-benzyloxazol-5-yl)-2-(dimethyl(phenyl)silyl)-2-hydroxypropanoate (C29)**

(C<sub>25</sub>H<sub>31</sub>NO<sub>4</sub>Si) 19.3 mg, 44% yield, 93% ee; Colorless oil; R<sub>f</sub> = 0.4 (petroleum ether/ethyl acetate = 5:1). [α]<sub>D</sub><sup>23</sup> = -12.4 (c = 0.48, in CH<sub>2</sub>Cl<sub>2</sub>). Dissolved in *i*-PrOH for UPC<sup>2</sup> (Daicel Chiralcel **OZ-3**, CO<sub>2</sub>/MeOH = 95/5, flow rate = 1.5 mL/min, λ = 210 nm), retention time: tr (minor) = 6.32 min, tr (major) = 7.55 min.

<sup>1</sup>H NMR (400 MHz, CDCl<sub>3</sub>) δ 7.63 – 7.55 (m, 2H), 7.42 – 7.33 (m, 3H), 7.32 – 7.27 (m, 2H), 7.25 – 7.19 (m, 3H), 6.74 – 6.68 (m, 1H), 4.00 (d, *J* = 15.6, 18.0 Hz, 2H), 3.22 – 3.09 (m, 2H), 2.99 (d, *J* = 15.6 Hz, 1H), 1.27 (s, 9H), 0.43 (d, *J* = 6.4 Hz, 6H).

<sup>13</sup>C NMR (101 MHz, CDCl<sub>3</sub>) δ 175.6, 162.3, 148.6, 135.8, 134.8, 134.6, 130.0, 128.9, 128.8, 127.9, 127.1, 125.0, 82.8, 72.0, 34.8, 31.9, 28.0, -5.3, -5.3.

ESI-HRMS: calcd for C<sub>25</sub>H<sub>32</sub>NO<sub>4</sub>Si<sup>+</sup> ([M + H]<sup>+</sup>) = 438.2095, found: 438.2095.

IR (neat): 2926, 1709, 1563, 1427, 1369, 1266, 1155, 1109, 1067, 968, 836, 735, 700 cm<sup>-1</sup>.

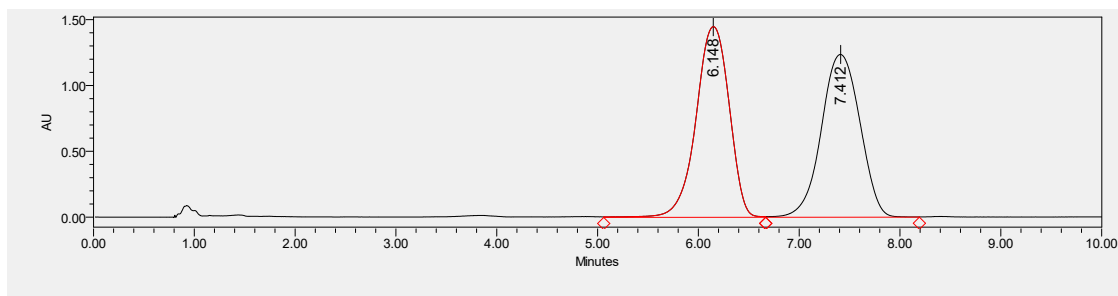

| Entry | Retention Time | Area     | % Area |
|-------|----------------|----------|--------|
| 1     | 6.148          | 33139527 | 50.18  |
| 2     | 7.412          | 32897832 | 49.82  |

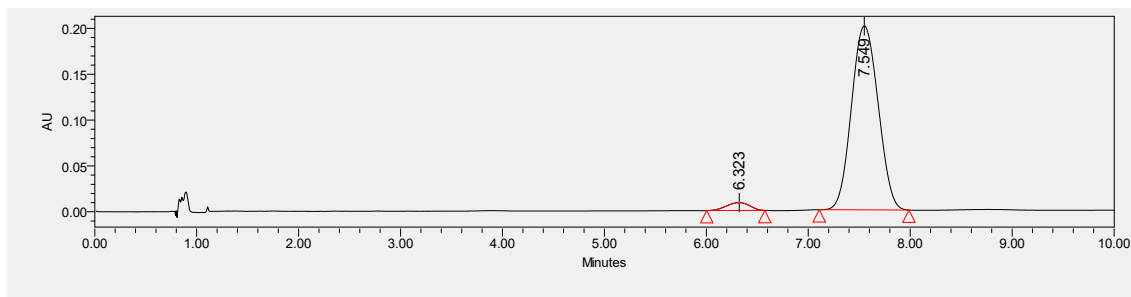

| Entry | Retention Time | Area    | % Area |
|-------|----------------|---------|--------|
| 1     | 6.323          | 135606  | 3.59   |
| 2     | 7.549          | 3645680 | 96.41  |

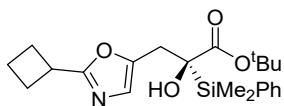

**Tert-butyl (R)-3-(2-cyclobutyloxazol-5-yl)-2-(dimethyl(phenyl)silyl)-2-hydroxypropanoate (C30)**

(C<sub>22</sub>H<sub>31</sub>NO<sub>4</sub>Si) 13.7 mg, 34% yield, 95% ee; Colorless oil; R<sub>f</sub> = 0.4 (petroleum ether/ethyl acetate = 5:1). [α]<sub>D</sub><sup>23</sup> = -16.2 (c = 0.68, in CH<sub>2</sub>Cl<sub>2</sub>). Dissolved in *i*-PrOH for UPC<sup>2</sup> (Daicel Chiralcel **OZ-3**, CO<sub>2</sub>/MeOH = 95/5, flow rate = 1.5 mL/min, λ = 210 nm), retention time: tr (minor) = 3.70 min, tr (major) = 4.66 min.

<sup>1</sup>H NMR (400 MHz, CDCl<sub>3</sub>) δ 7.63 – 7.55 (m, 2H), 7.43 – 7.33 (m, 3H), 6.69 (s, 1H), 3.57 – 3.45 (m, 1H), 3.17 (dd, *J* = 15.2, 0.8 Hz, 1H), 3.12 (s, 1H), 3.00 (d, *J* = 15.2 Hz, 1H), 2.41 – 2.22 (m, 4H), 2.09 – 1.95 (m, 1H), 1.94 – 1.84 (m, 1H), 1.33 (s, 9H), 0.45 (d, *J* = 7.6 Hz, 6H).

<sup>13</sup>C NMR (101 MHz, CDCl<sub>3</sub>) δ 175.6, 166.5, 147.8, 134.8, 134.7, 130.0, 127.9, 124.7, 82.8, 72.0, 33.2, 32.0, 28.1, 27.4, 27.3, 18.7, -5.3, -5.3.

ESI-HRMS: calcd for C<sub>22</sub>H<sub>32</sub>NO<sub>4</sub>Si<sup>+</sup> ([M + H]<sup>+</sup>) = 402.2095, found: 402.2100.

IR (neat): 2976, 1709, 1564, 1427, 1369, 1250, 1155, 1117, 1066, 961, 835, 811, 783, 737, 701 cm<sup>-1</sup>.

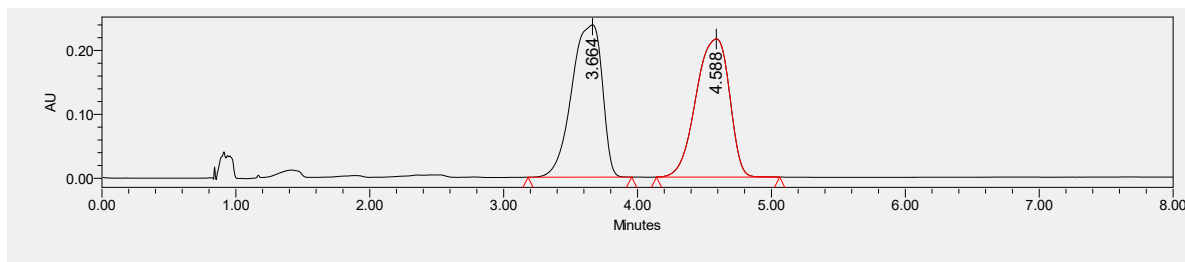

| Entry | Retention Time | Area    | % Area |
|-------|----------------|---------|--------|
| 1     | 3.664          | 3773771 | 50.19  |
| 2     | 4.588          | 3745313 | 49.81  |

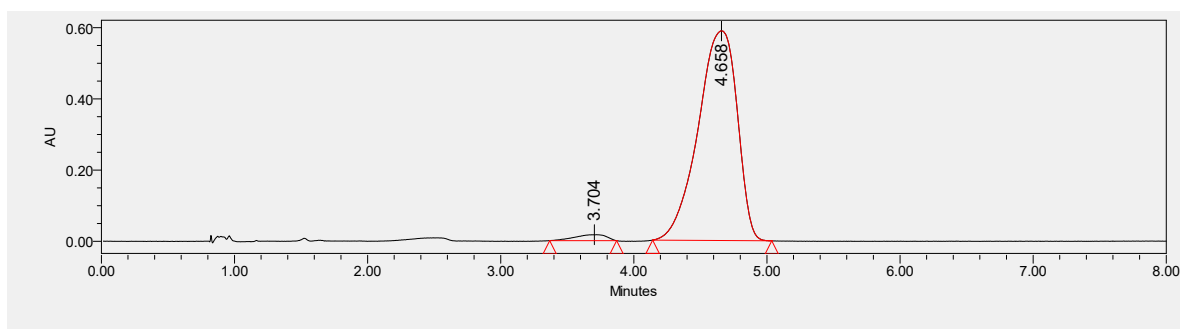

| Entry | Retention Time | Area     | % Area |
|-------|----------------|----------|--------|
| 1     | 3.704          | 278366   | 2.26   |
| 2     | 4.658          | 12026396 | 97.74  |

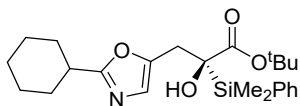

**Tert-butyl (R)-3-(2-cyclohexyloxazol-5-yl)-2-(dimethyl(phenyl)silyl)-2-hydroxypropanoate (C31)**  
 (C<sub>24</sub>H<sub>35</sub>NO<sub>4</sub>Si) 32.2 mg, 75% yield, 99% ee; Colorless oil; R<sub>f</sub> = 0.4 (petroleum ether/ethyl acetate = 5:1). [α]<sub>D</sub><sup>25</sup> = -16.0 (c = 0.80, in CH<sub>2</sub>Cl<sub>2</sub>). Dissolved in *i*-PrOH for UPC<sup>2</sup> (Daicel Chiralcel **OZ-3**, CO<sub>2</sub>/MeOH = 95/5, flow rate = 1.5 mL/min, λ = 210 nm), retention time: tr (minor) = 4.39 min, tr (major) = 5.58 min.

**<sup>1</sup>H NMR** (400 MHz, CDCl<sub>3</sub>) δ 7.63 – 7.56 (m, 2H), 7.42 – 7.33 (m, 3H), 6.68 – 6.63 (m, 1H), 3.21 – 3.09 (m, 2H), 3.00 (d, *J* = 15.2 Hz, 1H), 2.74 – 2.59 (m, 1H), 2.03 – 1.93 (m, 2H), 1.81 – 1.71 (m, 3H), 1.70 – 1.61 (m, 1H), 1.55 – 1.44 (m, 2H), 1.32 (s, 9H), 1.28 – 1.20 (m, 2H), 0.44 (d, *J* = 9.6 Hz, 6H).

**<sup>13</sup>C NMR** (101 MHz, CDCl<sub>3</sub>) δ 175.7, 167.5, 147.6, 134.8, 130.0, 127.9, 124.4, 82.7, 72.1, 37.6, 32.0, 30.7, 30.6, 28.1, 25.9, 25.8, -5.3, -5.3.

**ESI-HRMS:** calcd for C<sub>24</sub>H<sub>36</sub>NO<sub>4</sub>Si<sup>+</sup> ([M + H]<sup>+</sup>) = 430.2408, found: 430.2406.

**IR** (neat): 2930, 1710, 1562, 1451, 1427, 1368, 1251, 1156, 1110, 1067, 962, 836, 811, 783, 737, 701 cm<sup>-1</sup>.

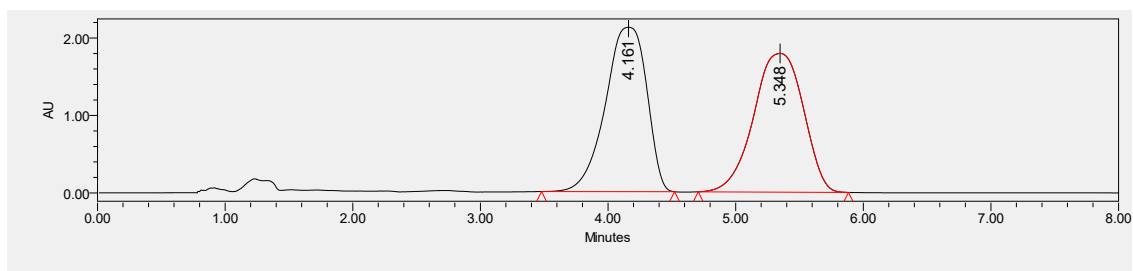

| Entry | Retention Time | Area     | % Area |
|-------|----------------|----------|--------|
| 1     | 4.161          | 47785429 | 49.64  |
| 2     | 5.348          | 48469725 | 50.36  |

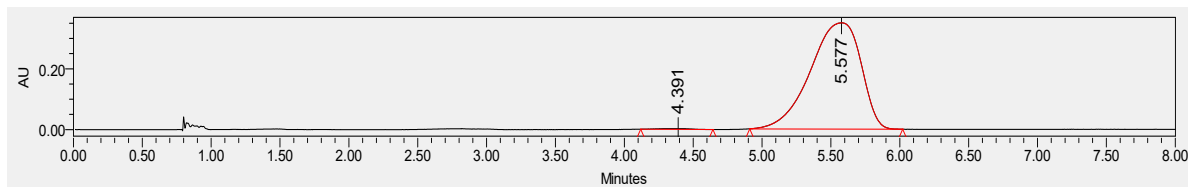

| Entry | Retention Time | Area    | % Area |
|-------|----------------|---------|--------|
| 1     | 4.391          | 39602   | 0.44   |
| 2     | 5.577          | 8941836 | 99.56  |

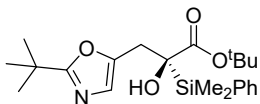

**Tert-butyl (R)-3-(2-(tert-butyl)oxazol-5-yl)-2-(dimethyl(phenyl)silyl)-2-hydroxypropanoate (C32)**  
 (C<sub>22</sub>H<sub>33</sub>NO<sub>4</sub>Si) 33.9 mg, 84% yield, 99% ee; Colorless oil; R<sub>f</sub> = 0.4 (petroleum ether/ethyl acetate = 7:1). [α]<sub>D</sub><sup>24</sup> = -23.5 (c = 0.85, in CH<sub>2</sub>Cl<sub>2</sub>). Dissolved in *i*-PrOH for UPC<sup>2</sup> (Daicel Chiralpak **IE-3**, CO<sub>2</sub>/EtOH = 95/5, flow rate = 1.0 mL/min, λ = 210 nm), retention time: tr (major) = 9.72 min, tr (minor) = 10.69 min.

<sup>1</sup>H NMR (400 MHz, CDCl<sub>3</sub>) δ 7.65 – 7.55 (m, 2H), 7.43 – 7.32 (m, 3H), 6.66 (s, 1H), 3.16 (m, 2H), 3.03 (d, *J* = 15.6 Hz, 1H), 1.31 (s, 18H), 0.45 (d, *J* = 12.8 Hz, 6H).

<sup>13</sup>C NMR (101 MHz, CDCl<sub>3</sub>) δ 175.7, 170.4, 147.9, 134.8, 134.7, 130.0, 127.9, 124.2, 82.7, 72.0, 33.7, 32.0, 28.7, 28.2, -5.2, -5.3.

**ESI-HRMS:** calcd for C<sub>22</sub>H<sub>34</sub>NO<sub>4</sub>Si<sup>+</sup> ([M + H]<sup>+</sup>) = 404.2252, found: 404.2249.

**IR** (neat): 2973, 1710, 1560, 1368, 1251, 1156, 1114, 1067, 960, 836, 811, 783, 734, 701 cm<sup>-1</sup>.

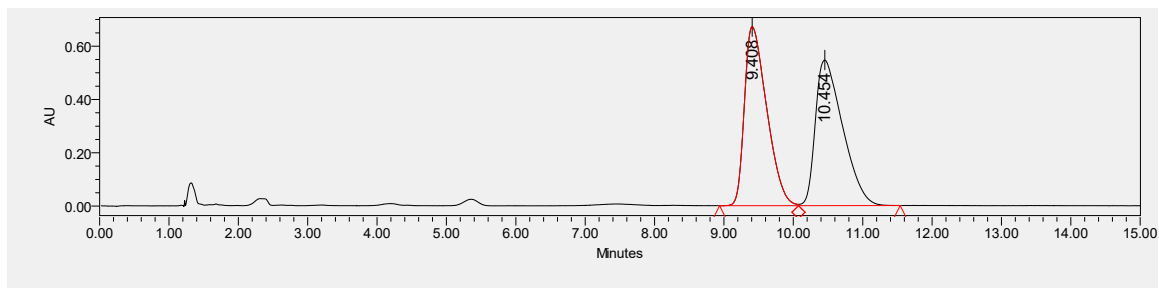

| Entry | Retention Time | Area     | % Area |
|-------|----------------|----------|--------|
| 1     | 9.408          | 14964782 | 50.06  |
| 2     | 10.454         | 14929035 | 49.94  |

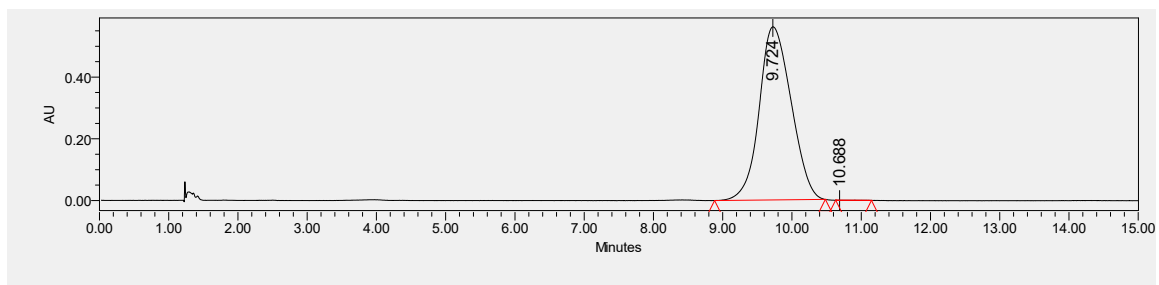

| Entry | Retention Time | Area     | % Area |
|-------|----------------|----------|--------|
| 1     | 9.724          | 17989412 | 99.98  |
| 2     | 10.688         | 3475     | 0.02   |

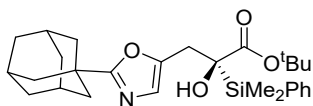

**Tert-butyl (R)-3-(2-((3R,5R,7R)-adamantan-1-yl)oxazol-5-yl)-2-(dimethyl(phenyl)silyl)-2-hydroxypropanoate (C33)**

(C<sub>28</sub>H<sub>39</sub>NO<sub>4</sub>Si) 29.4 mg, 61% yield, 99% ee; Colorless oil; R<sub>f</sub> = 0.4 (petroleum ether/ethyl acetate = 5:1). [α]<sub>D</sub><sup>24</sup> = -20.0 (c = 0.74, in CH<sub>2</sub>Cl<sub>2</sub>). Dissolved in *i*-PrOH for UPC<sup>2</sup> (Daicel Chiralpak IA-3, CO<sub>2</sub>/MeOH = 95/5, flow rate = 1.5 mL/min, λ = 210 nm), retention time: tr (major) = 5.47 min, tr (minor) = 6.61 min.

<sup>1</sup>H NMR (400 MHz, CDCl<sub>3</sub>) δ 7.63 – 7.57 (m, 2H), 7.42 – 7.32 (m, 3H), 6.67 (s, 1H), 3.24 – 3.09 (m, 2H), 3.05 (d, *J* = 15.6 Hz, 1H), 2.03 (s, 3H), 1.96 (m, 6H), 1.76 – 1.69 (m, 6H), 1.31 (s, 9H), 0.44 (d, *J* = 13.6 Hz, 6H).

<sup>13</sup>C NMR (101 MHz, CDCl<sub>3</sub>) δ 175.7, 170.2, 147.5, 134.8, 134.7, 130.0, 127.9, 124.1, 82.7, 72.1, 40.4, 36.6, 35.6, 32.0, 28.2, 28.1, -5.2, -5.3.

ESI-HRMS: calcd for C<sub>28</sub>H<sub>40</sub>NO<sub>4</sub>Si<sup>+</sup> ([M + H]<sup>+</sup>) = 482.2721, found: 482.2726.

IR (neat): 2906, 1710, 1555, 1453, 1368, 1252, 1155, 1115, 1068, 955, 835, 811, 783, 736, 701 cm<sup>-1</sup>.

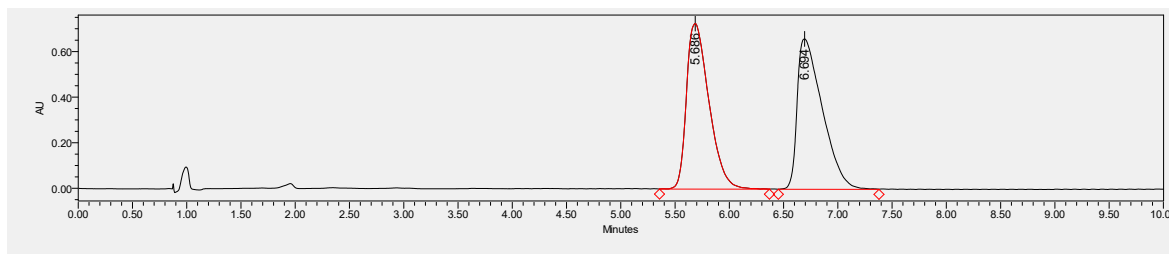

| Entry | Retention Time | Area     | % Area |
|-------|----------------|----------|--------|
| 1     | 5.686          | 10466847 | 49.68  |
| 2     | 6.694          | 10603254 | 50.32  |

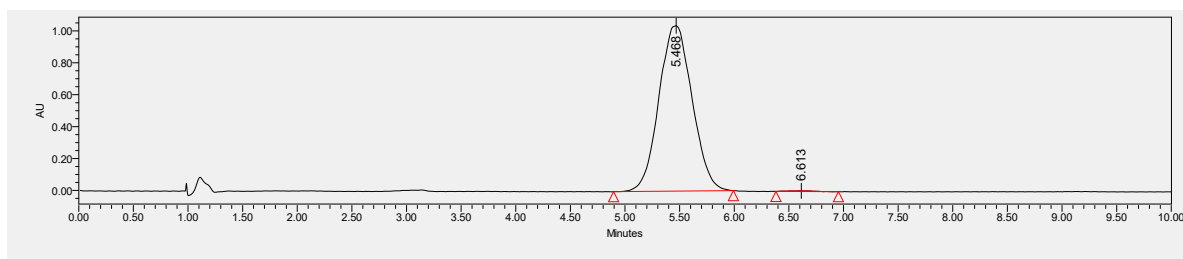

| Entry | Retention Time | Area     | % Area |
|-------|----------------|----------|--------|
| 1     | 5.468          | 21913028 | 99.69  |
| 2     | 6.613          | 67305    | 0.31   |

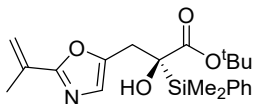

**Tert-butyl (R)-2-(dimethyl(phenyl)silyl)-2-hydroxy-3-(2-(prop-1-en-2-yl)oxazol-5-yl)propanoate (C34)**

(C<sub>21</sub>H<sub>29</sub>NO<sub>4</sub>Si) 35.7 mg, 92% yield, 83% ee; Colorless oil; R<sub>f</sub> = 0.4 (petroleum ether/ethyl acetate = 7:1). [α]<sub>365</sub><sup>24</sup> = +11.8 (c = 0.89, in CH<sub>2</sub>Cl<sub>2</sub>). Dissolved in *i*-PrOH for UPC<sup>2</sup> (Daicel Chiralpak IE-3, CO<sub>2</sub>/MeOH = 90/10, flow rate = 1.5 mL/min, λ = 254 nm), retention time: tr (major) = 3.37 min, tr (minor) = 3.83 min.

<sup>1</sup>H NMR (400 MHz, CDCl<sub>3</sub>) δ 7.63 – 7.57 (m, 2H), 7.43 – 7.34 (m, 3H), 6.82 (s, 1H), 5.80 (s, 1H), 5.28 (s, 1H), 3.21 (d, *J* = 15.6 Hz, 1H), 3.16 (s, 1H), 3.05 (d, *J* = 15.6 Hz, 1H), 2.10 (s, 3H), 1.32 (s, 9H), 0.46 (d, *J* = 5.6 Hz, 6H).

<sup>13</sup>C NMR (101 MHz, CDCl<sub>3</sub>) δ 175.5, 162.0, 148.4, 134.8, 134.6, 131.8, 130.0, 127.9, 125.9, 117.3, 82.9, 72.0, 32.0, 28.1, 19.2, -5.3, -5.3.

ESI-HRMS: calcd for C<sub>21</sub>H<sub>30</sub>NO<sub>4</sub>Si<sup>+</sup> ([M + H]<sup>+</sup>) = 388.1939, found: 388.1932.

IR (neat): 2976, 1707, 1526, 1368, 1252, 1154, 1117, 1066, 836, 782, 701, 650 cm<sup>-1</sup>.

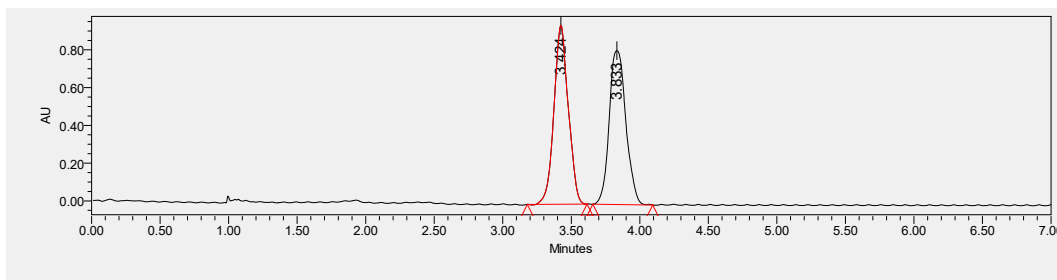

| Entry | Retention Time | Area    | % Area |
|-------|----------------|---------|--------|
| 1     | 3.424          | 6890082 | 49.96  |
| 2     | 3.833          | 6899772 | 50.04  |

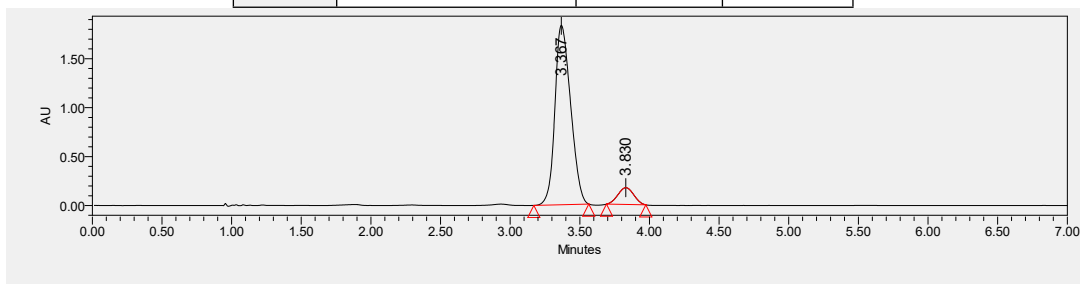

| Entry | Retention Time | Area     | % Area |
|-------|----------------|----------|--------|
| 1     | 3.367          | 14407064 | 91.37  |
| 2     | 3.830          | 1361548  | 8.63   |

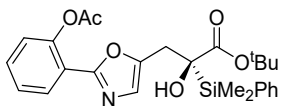

**Tert-butyl (R)-3-(2-(2-acetoxyphenyl)oxazol-5-yl)-2-(dimethyl(phenyl)silyl)-2-hydroxypropanoate (C35)**

(C<sub>26</sub>H<sub>31</sub>NO<sub>6</sub>Si) 38.5 mg, 80% yield, 96% ee; Colorless oil; R<sub>f</sub> = 0.4 (petroleum ether/ethyl acetate = 7:1). [α]<sub>D</sub><sup>24</sup> = -29.3 (c = 1.93, in CH<sub>2</sub>Cl<sub>2</sub>). Dissolved in *i*-PrOH for UPC<sup>2</sup> (Daicel Chiralcel **OZ-3**, CO<sub>2</sub>/MeOH = 90/10, flow rate = 1.5 mL/min, λ = 254 nm), retention time: tr (minor) = 3.35 min, tr (major) = 6.03 min.

<sup>1</sup>H NMR (400 MHz, CDCl<sub>3</sub>) δ 8.01 (dd, *J* = 8.0, 2.0 Hz, 1H), 7.67 – 7.59 (m, 2H), 7.45 – 7.35 (m, 4H), 7.32 – 7.27 (m, 1H), 7.12 (dd, *J* = 8.0, 1.2 Hz, 1H), 6.91 (s, 1H), 3.25 (d, *J* = 15.6 Hz, 1H), 3.19 (s, 1H), 3.09 (d, *J* = 15.2 Hz, 1H), 2.34 (s, 3H), 1.32 (s, 9H), 0.48 (d, *J* = 4.0 Hz, 6H).

<sup>13</sup>C NMR (101 MHz, CDCl<sub>3</sub>) δ 175.4, 170.2, 157.9, 148.8, 148.1, 134.8, 134.5, 131.1, 130.0, 129.1, 127.9, 126.4, 126.0, 124.0, 120.9, 83.0, 72.4, 31.9, 28.1, 21.3, -5.3, -5.4.

ESI-HRMS: calcd for C<sub>26</sub>H<sub>32</sub>NO<sub>6</sub>Si<sup>+</sup> ([M + H]<sup>+</sup>) = 482.1993, found: 482.1992.

IR (neat): 2974, 1768, 1708, 1487, 1368, 1250, 1191, 1155, 1063, 955, 835, 784, 704, 654 cm<sup>-1</sup>.

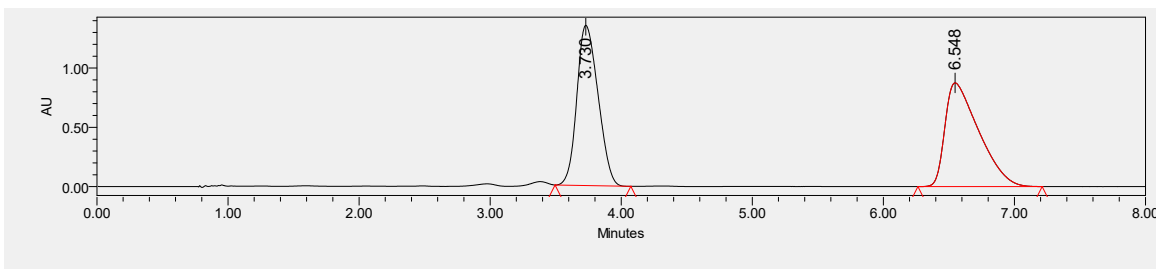

| Entry | Retention Time | Area     | % Area |
|-------|----------------|----------|--------|
| 1     | 3.730          | 15222515 | 49.37  |
| 2     | 6.548          | 15608458 | 50.63  |

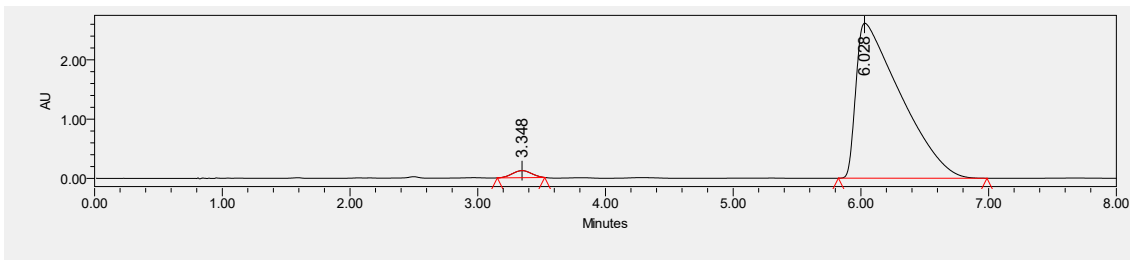

| Entry | Retention Time | Area     | % Area |
|-------|----------------|----------|--------|
| 1     | 3.348          | 1246327  | 1.92   |
| 2     | 6.028          | 63515629 | 98.08  |

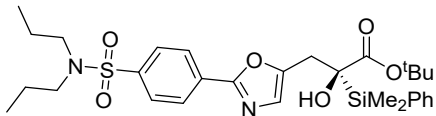

**Tert-butyl (R)-2-(dimethyl(phenyl)silyl)-3-(2-(4-(N,N-dipropylsulfamoyl)phenyl)oxazol-5-yl)-2-hydroxypropanoate (C36)**

(C<sub>30</sub>H<sub>42</sub>N<sub>2</sub>O<sub>6</sub>SSi) 39.3 mg, 67% yield, 97% ee; Colorless oil; R<sub>f</sub> = 0.4 (petroleum ether/ethyl acetate = 5:1). [α]<sub>D</sub><sup>23</sup> = -1.0 (c = 1.95, in CH<sub>2</sub>Cl<sub>2</sub>). Dissolved in *i*-PrOH for UPC<sup>2</sup> (Daicel Chiralcel **OZ-3**, CO<sub>2</sub>/MeOH = 90/10, flow rate = 1.5 mL/min, λ = 254 nm), retention time: tr (minor) = 8.18 min, tr (major) = 9.08 min.

<sup>1</sup>H NMR (400 MHz, CDCl<sub>3</sub>) δ 8.05 (d, *J* = 8.4 Hz, 2H), 7.83 (d, *J* = 8.8 Hz, 2H), 7.66 – 7.55 (m, 2H), 7.46 – 7.33 (m, 3H), 6.96 (s, 1H), 3.29 (d, *J* = 15.6 Hz, 1H), 3.22 (s, 1H), 3.14 (d, *J* = 15.2 Hz, 1H), 3.11 – 3.06 (m, 4H), 1.58 – 1.50 (m, 4H), 1.33 (s, 9H), 0.86 (t, *J* = 7.2 Hz, 6H), 0.48 (d, *J* = 3.6 Hz, 6H).

<sup>13</sup>C NMR (101 MHz, CDCl<sub>3</sub>) δ 175.5, 159.5, 150.0, 141.3, 134.8, 134.4, 131.0, 130.1, 128.0, 127.6, 126.8, 126.6, 83.1, 72.1, 50.0, 32.0, 28.1, 22.0, 11.3, -5.3, -5.3.

**ESI-HRMS:** calcd for C<sub>30</sub>H<sub>43</sub>N<sub>2</sub>O<sub>6</sub>SSi<sup>+</sup> ([M + H]<sup>+</sup>) = 587.2606, found: 587.2601.

**IR** (neat): 2967, 1732, 1593, 1462, 1368, 1340, 1252, 1154, 1117, 991, 835, 781, 702, 602, 567 cm<sup>-1</sup>.

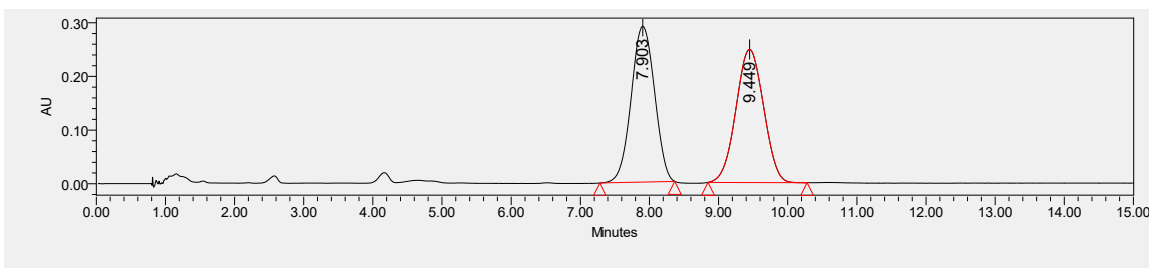

| Entry | Retention Time | Area    | % Area |
|-------|----------------|---------|--------|
| 1     | 7.903          | 6813953 | 49.74  |
| 2     | 9.449          | 6884826 | 50.26  |

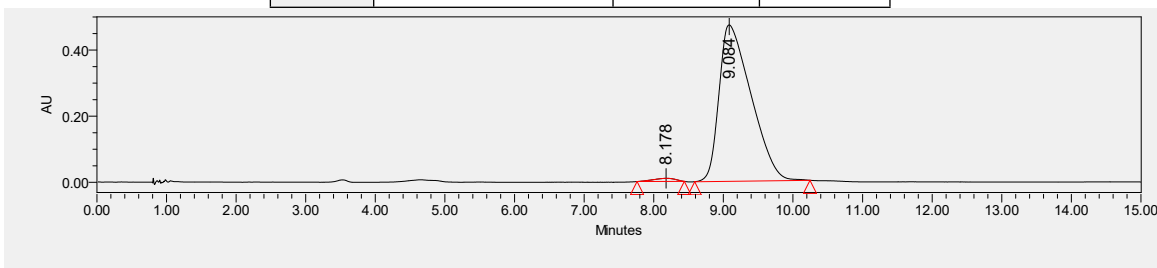

| Entry | Retention Time | Area     | % Area |
|-------|----------------|----------|--------|
| 1     | 8.178          | 210706   | 1.38   |
| 2     | 9.084          | 15075991 | 98.62  |



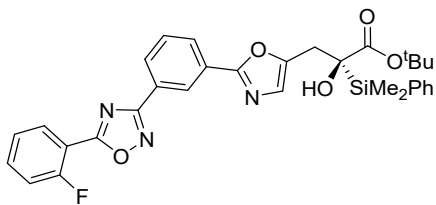

**Tert-butyl (R)-2-(dimethyl(phenyl)silyl)-3-(2-(3-(5-(2-fluorophenyl)-1,2,4-oxadiazol-3-yl)phenyl)oxazol-5-yl)-2-hydroxypropanoate (C37)**

(C<sub>32</sub>H<sub>32</sub>FN<sub>3</sub>O<sub>5</sub>Si) 50.4 mg, 86% yield, 99% ee; Colorless oil; R<sub>f</sub> = 0.4 (petroleum ether/ethyl acetate = 5:1). [α]<sub>D</sub><sup>23</sup> = +3.7 (c = 1.26, in CH<sub>2</sub>Cl<sub>2</sub>). Dissolved in *i*-PrOH for UPC<sup>2</sup> (Daicel Chiralpak AD-3, CO<sub>2</sub>/MeOH = 85/15, flow rate = 1.5 mL/min, λ = 254 nm), retention time: tr (major) = 6.47 min, tr (minor) = 8.54 min.

<sup>1</sup>H NMR (400 MHz, CDCl<sub>3</sub>) δ 8.79-8.71 (m, 1H), 8.31 – 8.19 (m, 2H), 8.16-8.10 (m, 1H), 7.71 – 7.53 (m, 4H), 7.44 – 7.36 (m, 3H), 7.35 – 7.26 (m, 2H), 6.98 (s, 1H), 3.33 (d, *J* = 15.6 Hz, 1H), 3.26 (s, 1H), 3.20 – 3.13 (m, 1H), 1.36 (s, 9H), 0.50 (d, *J* = 4.0 Hz, 6H).

<sup>13</sup>C NMR (101 MHz, CDCl<sub>3</sub>) δ 175.6, 173.1 (d, *J* = 4.0 Hz), 168.3, 162.2, 160.2, 159.6, 149.3, 134.9, 134.8, 134.5, 131.2, 130.1, 129.5, 128.9 (d, *J* = 7.1 Hz), 128.5, 128.0, 127.6, 126.5, 125.3, 124.9 (d, *J* = 4.0 Hz), 117.3 (d, *J* = 21.2 Hz), 112.9 (d, *J* = 11.1 Hz), 83.1, 72.0, 32.1, 28.2, -5.2, -5.3.

<sup>19</sup>F NMR (377 MHz, CDCl<sub>3</sub>) δ -108.17.

ESI-HRMS: calcd for C<sub>32</sub>H<sub>33</sub>FN<sub>3</sub>O<sub>5</sub>Si<sup>+</sup> ([M + H]<sup>+</sup>) = 586.2168, found: 586.2166.

IR (neat): 2976, 1709, 1621, 1466, 1368, 1251, 1155, 1116, 1066, 955, 830, 811, 757, 719 cm<sup>-1</sup>.

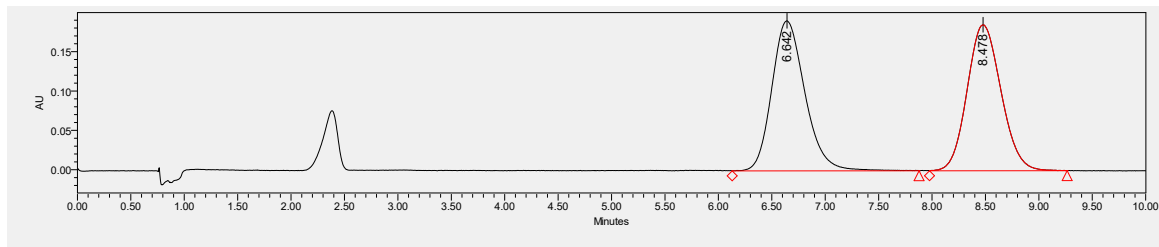

| Entry | Retention Time | Area    | % Area |
|-------|----------------|---------|--------|
| 1     | 6.642          | 4106926 | 50.15  |
| 2     | 8.478          | 4082284 | 49.85  |

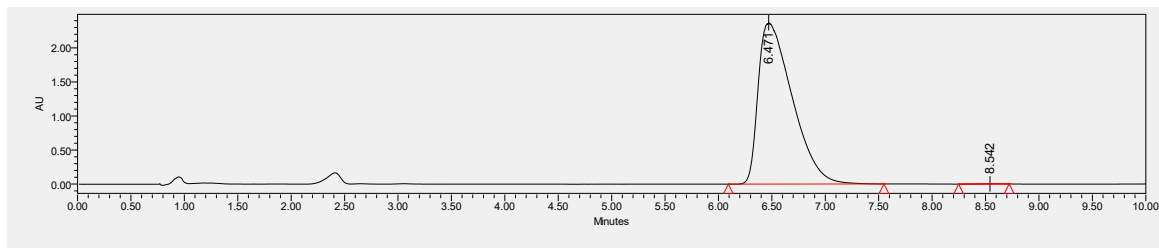

| Entry | Retention Time | Area     | % Area |
|-------|----------------|----------|--------|
| 1     | 6.471          | 52468500 | 99.93  |
| 2     | 8.542          | 34950    | 0.07   |

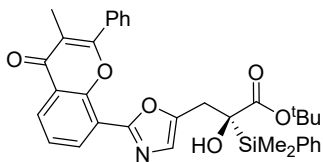

**Tert-butyl (*R*)-2-(dimethyl(phenyl)silyl)-2-hydroxy-3-(2-(3-methyl-4-oxo-2-phenyl-4H-chromen-8-yl)oxazol-5-yl)propanoate (C38)**

(C<sub>34</sub>H<sub>35</sub>NO<sub>6</sub>Si) 52.9 mg, 91% yield, 99% ee; Colorless oil; R<sub>f</sub> = 0.4 (petroleum ether/ethyl acetate = 3:1). [α]<sub>D</sub><sup>24</sup> = +8.0 (c = 1.33, in CH<sub>2</sub>Cl<sub>2</sub>). Dissolved in *i*-PrOH for UPC<sup>2</sup> (Daicel Chiralpak IA-3, CO<sub>2</sub>/MeOH = 85/15, flow rate = 1.5 mL/min, λ = 254 nm), retention time: tr (major) = 7.87 min, tr (minor) = 10.53 min.

<sup>1</sup>H NMR (400 MHz, CDCl<sub>3</sub>) δ 8.33 (dd, *J* = 7.6, 1.6 Hz, 1H), 8.28 (dd, *J* = 7.6, 1.6 Hz, 1H), 7.91 – 7.83 (m, 2H), 7.65 – 7.57 (m, 2H), 7.52 – 7.36 (m, 7H), 7.01 (s, 1H), 3.27 (d, *J* = 15.6 Hz, 1H), 3.22 (s, 1H), 3.13 (d, *J* = 15.2 Hz, 1H), 2.28 (s, 3H), 1.24 (s, 9H), 0.47 (d, *J* = 3.6 Hz, 6H).

<sup>13</sup>C NMR (101 MHz, CDCl<sub>3</sub>) δ 178.7, 175.5, 161.0, 157.6, 152.9, 149.6, 134.8, 134.5, 133.6, 133.2, 130.6, 130.1, 129.8, 128.5, 128.1, 128.0, 126.2, 124.6, 123.3, 117.8, 117.6, 83.0, 72.2, 32.0, 28.0, 12.1, -5.2, -5.3.

**ESI-HRMS:** calcd for C<sub>34</sub>H<sub>36</sub>NO<sub>6</sub>Si<sup>+</sup> ([M + H]<sup>+</sup>) = 582.2306, found: 582.2307.

**IR** (neat): 2974, 1710, 1631, 1580, 1438, 1390, 1252, 1153, 1112, 1064, 1020, 947, 835, 762, 736, 698, 645 cm<sup>-1</sup>.

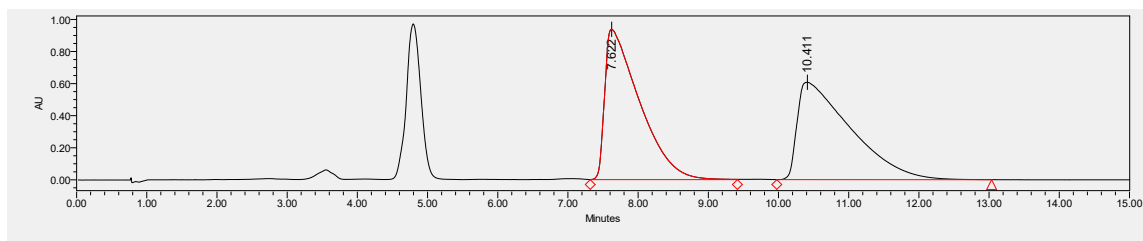

| Entry | Retention Time | Area     | % Area |
|-------|----------------|----------|--------|
| 1     | 7.622          | 32233922 | 50.08  |
| 2     | 10.411         | 32131765 | 49.92  |

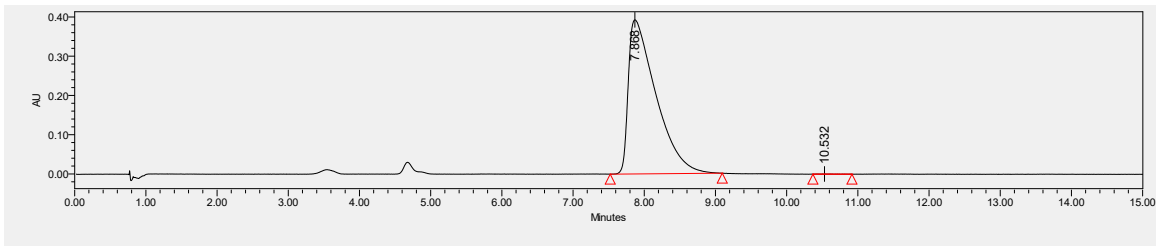

| Entry | Retention Time | Area     | % Area |
|-------|----------------|----------|--------|
| 1     | 7.868          | 10556446 | 99.95  |
| 2     | 10.532         | 5238     | 0.05   |

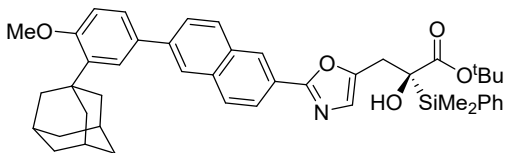

**Tert-butyl (R)-3-(2-(6-(3-((3R,5R,7R)-adamantan-1-yl)-4-methoxyphenyl)naphthalen-2-yl)oxazol-5-yl)-2-(dimethyl(phenyl)silyl)-2-hydroxypropanoate (C39)**

(C<sub>45</sub>H<sub>51</sub>NO<sub>5</sub>Si) 57.1 mg, 80% yield, 98% ee; Colorless oil; R<sub>f</sub> = 0.4 (petroleum ether/ethyl acetate = 7:1). [α]<sub>D</sub><sup>23</sup> = -4.2 (c = 2.87, in CH<sub>2</sub>Cl<sub>2</sub>). Dissolved in *i*-PrOH for UPC<sup>2</sup> (Daicel Chiralcel **OZ-3**, CO<sub>2</sub>/MeOH = 85/15, flow rate = 1.5 mL/min, λ = 254 nm), retention time: tr (minor) = 15.17 min, tr (major) = 16.47 min.

<sup>1</sup>H NMR (400 MHz, CDCl<sub>3</sub>) δ 8.50 – 8.43 (m, 1H), 8.09 (dd, *J* = 8.8, 1.6 Hz, 1H), 8.03 – 7.97 (m, 1H), 7.93 (dd, *J* = 8.4, 2.4 Hz, 2H), 7.78 (dd, *J* = 8.4, 1.6 Hz, 1H), 7.71 – 7.63 (m, 2H), 7.61 (d, *J* = 2.4 Hz, 1H), 7.54 (dd, *J* = 8.4, 2.0 Hz, 1H), 7.49 – 7.37 (m, 3H), 7.07 – 6.94 (m, 2H), 3.90 (s, 3H), 3.35 (d, *J* = 15.2 Hz, 1H), 3.30 (s, 1H), 3.23 – 3.16 (m, 1H), 2.26 – 2.16 (m, 6H), 2.16 – 2.08 (m, 3H), 1.85 – 1.78 (m, 6H), 1.37 (s, 9H), 0.53 (d, *J* = 5.6 Hz, 6H).

<sup>13</sup>C NMR (101 MHz, CDCl<sub>3</sub>) δ 175.6, 161.3, 158.9, 148.9, 140.3, 139.1, 134.8, 134.6, 134.5, 132.9, 131.9, 130.1, 129.1, 128.8, 128.0, 126.6, 126.4, 126.1, 125.8, 125.0, 124.6, 123.7, 112.2, 83.0, 72.2, 55.3, 40.8, 37.3, 37.3, 32.1, 29.3, 28.2, -5.2, -5.3.

HRMS (ESI+) *m/z* calcd for C<sub>45</sub>H<sub>52</sub>NO<sub>5</sub>Si [M+H]<sup>+</sup>: 714.3609, found: 714.3611.

IR (neat): 2903, 1711, 1598, 1492, 1368, 1238, 1155, 1118, 1063, 884, 810, 784, 735, 702 cm<sup>-1</sup>.

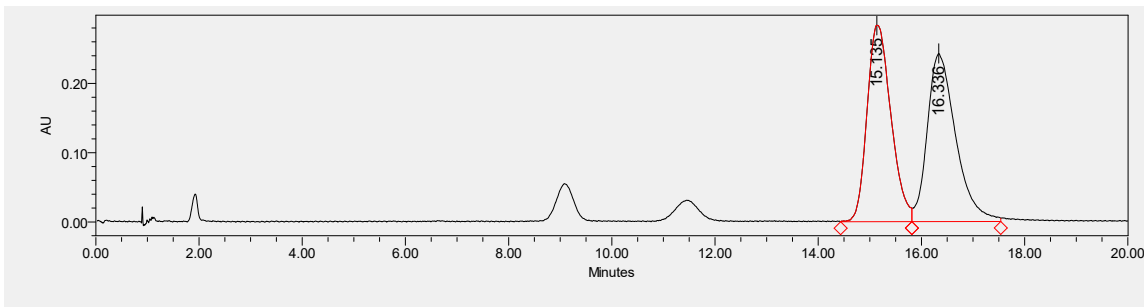

| Entry | Retention Time | Area    | % Area |
|-------|----------------|---------|--------|
| 1     | 15.135         | 9122657 | 49.58  |
| 2     | 16.336         | 9278946 | 50.42  |

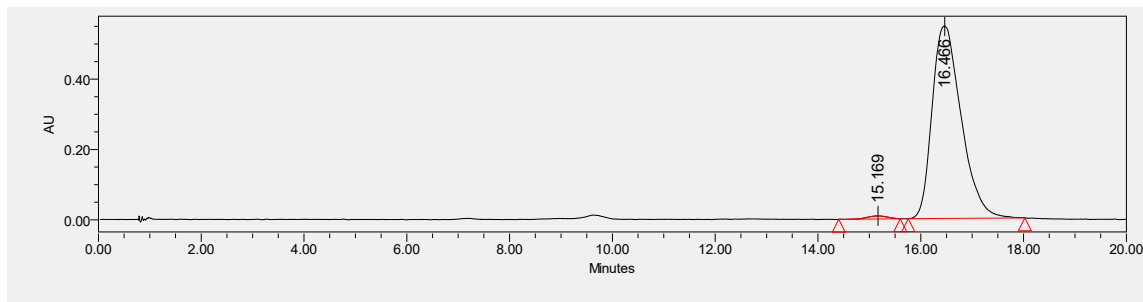

| Entry | Retention Time | Area     | % Area |
|-------|----------------|----------|--------|
| 1     | 15.169         | 235928   | 1.09   |
| 2     | 16.466         | 21479011 | 98.91  |

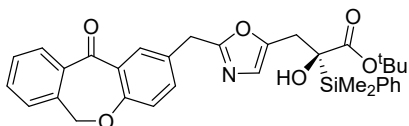

**Tert-butyl (*R*)-2-(dimethyl(phenyl)silyl)-2-hydroxy-3-(2-((11-oxo-6,11-dihydrodibenzo[*b,e*]oxepin-2-yl)methyl)oxazol-5-yl)propanoate (C40)**

(C<sub>33</sub>H<sub>35</sub>NO<sub>6</sub>Si) 22.8 mg, 40% yield, 90% ee; Colorless oil; R<sub>f</sub> = 0.4 (petroleum ether/ethyl acetate = 2:1). [α]<sub>D</sub><sup>24</sup> = -4.3 (c = 1.15, in CH<sub>2</sub>Cl<sub>2</sub>). Dissolved in *i*-PrOH for UPC<sup>2</sup> (Daicel Chiralcel **OZ-3**, CO<sub>2</sub>/MeOH = 80/20, flow rate = 1.5 mL/min, λ = 210 nm), retention time: tr (minor) = 6.79 min, tr (major) = 7.73 min.

<sup>1</sup>H NMR (400 MHz, CDCl<sub>3</sub>) δ 8.09 (d, *J* = 2.4 Hz, 1H), 7.87 (dd, *J* = 7.6, 1.2 Hz, 1H), 7.60 – 7.52 (m, 3H), 7.49 – 7.43 (m, 1H), 7.42 – 7.32 (m, 5H), 7.00 (d, *J* = 8.4 Hz, 1H), 6.72 (s, 1H), 5.16 (s, 2H), 4.01 (s, 2H), 3.19 – 3.12 (m, 2H), 2.99 (d, *J* = 15.6 Hz, 1H), 1.28 (s, 9H), 0.43 (d, *J* = 5.6 Hz, 6H).

<sup>13</sup>C NMR (101 MHz, CDCl<sub>3</sub>) δ 191.0, 175.6, 162.0, 160.6, 148.8, 140.6, 136.0, 135.7, 134.8, 134.6, 132.9, 132.1, 130.0, 129.7, 129.5, 129.4, 128.0, 127.9, 125.3, 125.1, 121.4, 82.9, 73.8, 72.0, 33.9, 31.9, 28.1, -5.3, -5.3.

**ESI-HRMS:** calcd for C<sub>33</sub>H<sub>36</sub>NO<sub>6</sub>Si<sup>+</sup> ([M + H]<sup>+</sup>) = 570.2306, found: 570.2314.

**IR** (neat): 2972, 1712, 1648, 1611, 1567, 1489, 1455, 1369, 1299, 1254, 1155, 1069, 1017, 834, 701 cm<sup>-1</sup>.

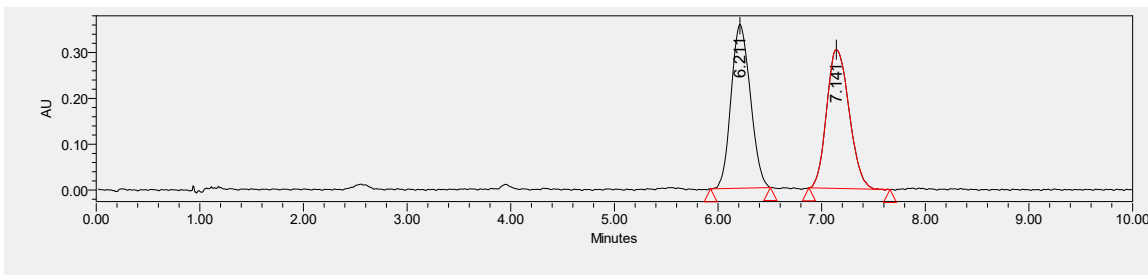

| Entry | Retention Time | Area    | % Area |
|-------|----------------|---------|--------|
| 1     | 6.211          | 4606500 | 50.22  |
| 2     | 7.141          | 4566824 | 49.78  |

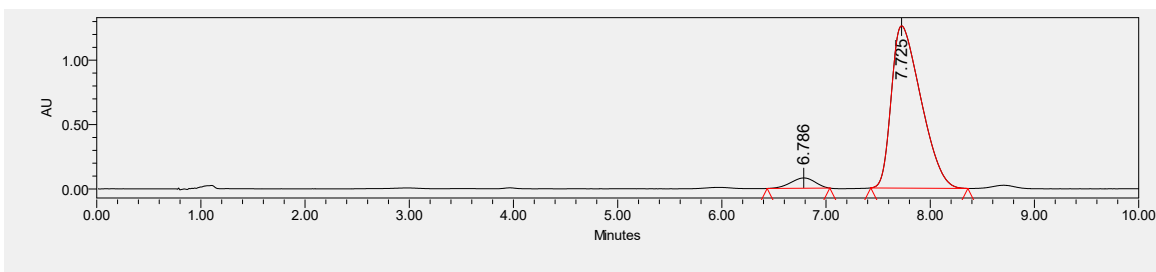

| Entry | Retention Time | Area     | % Area |
|-------|----------------|----------|--------|
| 1     | 6.786          | 1296576  | 4.97   |
| 2     | 7.725          | 24804345 | 95.03  |

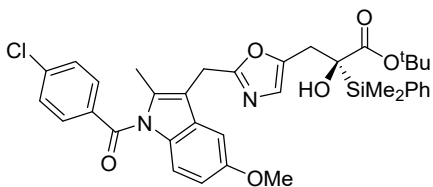

**Tert-butyl (R)-3-(2-((1-(4-chlorobenzoyl)-5-methoxy-2-methyl-1H-indol-3-yl)methyl)oxazol-5-yl)-2-(dimethyl(phenyl)silyl)-2-hydroxypropanoate (C41)**

(C<sub>36</sub>H<sub>39</sub>ClN<sub>2</sub>O<sub>6</sub>Si) 34.9 mg, 53% yield, 99% ee; Colorless oil; R<sub>f</sub> = 0.4 (petroleum ether/ethyl acetate = 3:1). [α]<sub>D</sub><sup>24</sup> = -3.0 (c = 1.73, in CH<sub>2</sub>Cl<sub>2</sub>). Colorless oil; 53% yield, 99% ee. Dissolved in *i*-PrOH for HPLC (Daicel Chiralcel **OZH**, *i*-PrOH/*n*-hexane = 15/85, flow rate = 1.0 mL/min, λ = 254 nm), retention time: tr (minor) = 27.66 min, tr (major) = 33.66 min.

<sup>1</sup>H NMR (400 MHz, CDCl<sub>3</sub>) δ 7.69 – 7.62 (m, 2H), 7.61-7.53 (m, 2H), 7.49 – 7.42 (m, 2H), 7.42 – 7.30 (m, 3H), 6.90 (d, *J* = 2.8 Hz, 1H), 6.84 (d, *J* = 8.8 Hz, 1H), 6.70 (s, 1H), 6.63 (dd, *J* = 8.8, 2.4 Hz, 1H), 4.04 (s, 2H), 3.78 (s, 3H), 3.16-3.07 (m, 2H), 3.02-2.94 (m, 1H), 2.38 (s, 3H), 1.23 (s, 9H), 0.42 (d, *J* = 8.0 Hz, 6H).

$^{13}\text{C}$  NMR (101 MHz,  $\text{CDCl}_3$ )  $\delta$  175.5, 168.5, 161.3, 156.1, 148.7, 139.4, 135.5, 134.8, 134.1, 131.4, 131.0, 130.6, 130.0, 129.3, 127.9, 124.8, 115.1, 113.8, 112.0, 101.4, 82.8, 72.0, 55.8, 31.9, 28.0, 24.0, 13.5, -5.3, -5.4.

**ESI-HRMS:** calcd for  $\text{C}_{36}\text{H}_{40}^{35}\text{ClN}_2\text{O}_6\text{Si}^+$  ( $[\text{M} + \text{H}]^+$ ) = 659.2339, found: 659.2330.  $\text{C}_{36}\text{H}_{40}^{37}\text{ClN}_2\text{O}_6\text{Si}^+$  ( $[\text{M} + \text{H}]^+$ ) = 660.2372, found: 660.2372.

**IR** (neat): 2928, 1683, 1593, 1478, 1397, 1367, 1319, 1250, 1152, 1065, 1015, 835, 811, 701  $\text{cm}^{-1}$ .

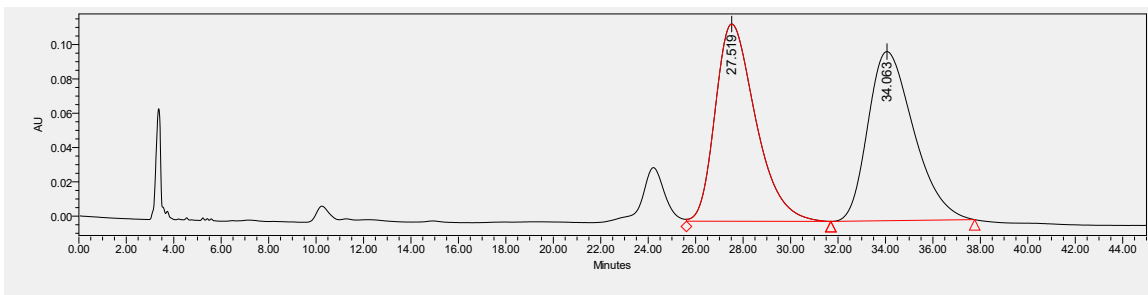

| Entry | Retention Time | Area     | % Area |
|-------|----------------|----------|--------|
| 1     | 27.519         | 13603938 | 50.71  |
| 2     | 34.063         | 13223039 | 49.29  |

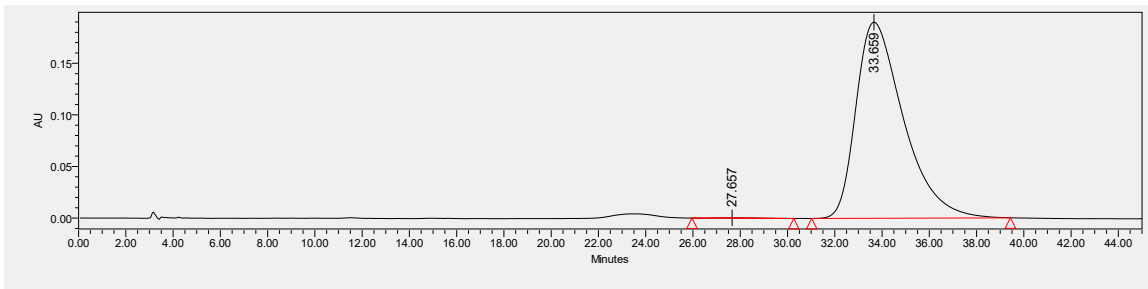

| Entry | Retention Time | Area     | % Area |
|-------|----------------|----------|--------|
| 1     | 27.657         | 44768    | 0.17   |
| 2     | 33.659         | 26481225 | 99.83  |

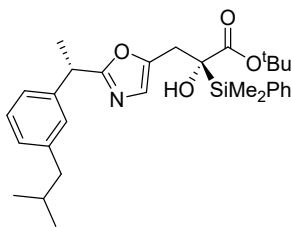

***Tert*-butyl (*R*)-2-(dimethyl(phenyl)silyl)-2-hydroxy-3-(2-((*S*)-1-(3-isobutylphenyl)ethyl)oxazol-5-yl)propanoate (C42)**

(C<sub>30</sub>H<sub>41</sub>NO<sub>4</sub>Si) 39.1 mg, 77% yield, 99% ee; Colorless oil; R<sub>f</sub> = 0.4 (petroleum ether/ethyl acetate = 5:1). [α]<sub>D</sub><sup>20</sup> = -9.3 (c = 0.85, in CH<sub>2</sub>Cl<sub>2</sub>). Dissolved in *i*-PrOH for UPC<sup>2</sup> (Daicel Chiralcel **OZ-3**, CO<sub>2</sub>/MeOH = 90/10, flow rate = 1.5 mL/min, λ = 210 nm), retention time: tr (major) = 2.55 min, tr (minor) = 2.99 min.

<sup>1</sup>H NMR (400 MHz, CDCl<sub>3</sub>) δ 7.62-7.54 (m, 2H), 7.43 – 7.32 (m, 3H), 7.13 – 7.01 (m, 4H), 6.73 (s, 1H), 4.13 (q, *J* = 7.2 Hz, 1H), 3.20 – 3.07 (m, 2H), 2.99 (d, *J* = 15.2 Hz, 1H), 2.42 (d, *J* = 7.2 Hz, 2H), 1.85 – 1.79 (m, 1H), 1.63 (d, *J* = 7.6 Hz, 3H), 1.22 (s, 9H), 0.88 (d, *J* = 6.4 Hz, 6H), 0.43 (d, *J* = 8.4 Hz, 6H).

<sup>13</sup>C NMR (101 MHz, CDCl<sub>3</sub>) δ 175.5, 166.0, 148.2, 140.3, 139.4, 134.8, 134.6, 130.0, 129.5, 127.9, 127.1, 124.6, 82.7, 72.0, 45.2, 39.3, 31.9, 30.3, 28.0, 22.5, 22.5, 20.3, -5.3, -5.4.

ESI-HRMS: calcd for C<sub>30</sub>H<sub>42</sub>NO<sub>4</sub>Si<sup>+</sup> ([M + H]<sup>+</sup>) = 508.2878, found: 508.2878.

IR (neat): 2956, 1709, 1560, 1512, 1458, 1368, 1251, 1155, 1117, 1065, 957, 835, 810, 783, 700, 654 cm<sup>-1</sup>.

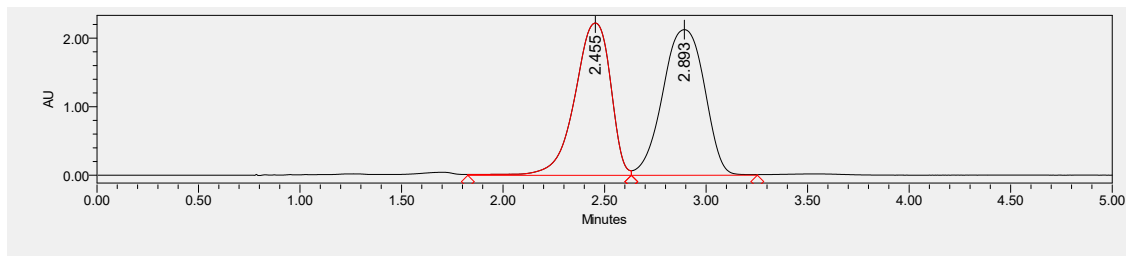

| Entry | Retention Time | Area     | % Area |
|-------|----------------|----------|--------|
| 1     | 2.455          | 27282132 | 47.22  |
| 2     | 2.893          | 30490394 | 52.78  |

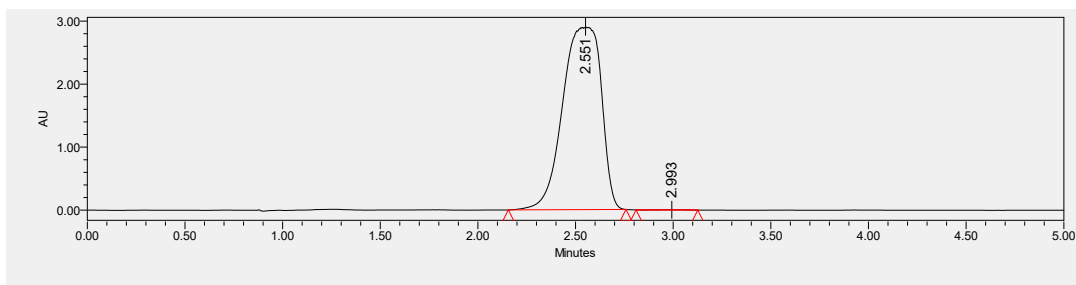

| Entry | Retention Time | Area     | % Area |
|-------|----------------|----------|--------|
| 1     | 2.551          | 39885882 | 99.90  |
| 2     | 2.993          | 38074    | 0.10   |

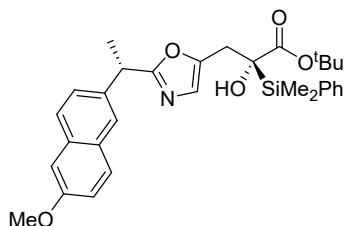

**Tert-butyl (R)-2-(dimethyl(phenyl)silyl)-2-hydroxy-3-(2-((S)-1-(6-methoxynaphthalen-2-yl)ethyl)oxazol-5-yl)propanoate (C43)**

(C<sub>31</sub>H<sub>37</sub>NO<sub>5</sub>Si) 38.8 mg, 73% yield, 99% ee; Colorless oil; R<sub>f</sub> = 0.4 (petroleum ether/ethyl acetate = 5:1). [α]<sub>D</sub><sup>20</sup> = -20.5 (c = 1.00, in CH<sub>2</sub>Cl<sub>2</sub>). Dissolved in *i*-PrOH for UPC<sup>2</sup> (Daicel Chiralcel **OZ-3**, CO<sub>2</sub>/MeOH = 90/10, flow rate = 1.5 mL/min, λ = 210 nm), retention time: tr (minor) = 6.62 min, tr (major) = 8.33 min.

<sup>1</sup>H NMR (400 MHz, CDCl<sub>3</sub>) δ 7.67 (dd, *J* = 8.8, 3.2 Hz, 2H), 7.61-7.55 (m, 3H), 7.42 – 7.28 (m, 4H), 7.15 – 7.06 (m, 2H), 6.76 (s, 1H), 4.30 (q, *J* = 3.2 Hz, 1H), 3.90 (s, 3H), 3.20 – 3.08 (m, 2H), 2.99 (d, *J* = 15.6 Hz, 1H), 1.72 (d, *J* = 7.2 Hz, 3H), 1.16 (s, 9H), 0.42 (d, *J* = 8.0 Hz, 6H).

<sup>13</sup>C NMR (101 MHz, CDCl<sub>3</sub>) δ 175.5, 165.9, 157.6, 148.4, 137.3, 134.7, 134.6, 133.7, 130.0, 129.4, 129.1, 127.9, 127.3, 126.2, 125.7, 124.6, 119.0, 105.7, 82.7, 72.0, 55.4, 39.6, 31.8, 27.9, 20.2, -5.3, -5.4.

**ESI-HRMS:** calcd for C<sub>31</sub>H<sub>38</sub>NO<sub>5</sub>Si<sup>+</sup> ([M + H]<sup>+</sup>) = 532.2514, found: 532.2505.

**IR (neat):** 2976, 1709, 1606, 1559, 1505, 1426, 1369, 1264, 1156, 1117, 1067, 836, 811, 702 cm<sup>-1</sup>.

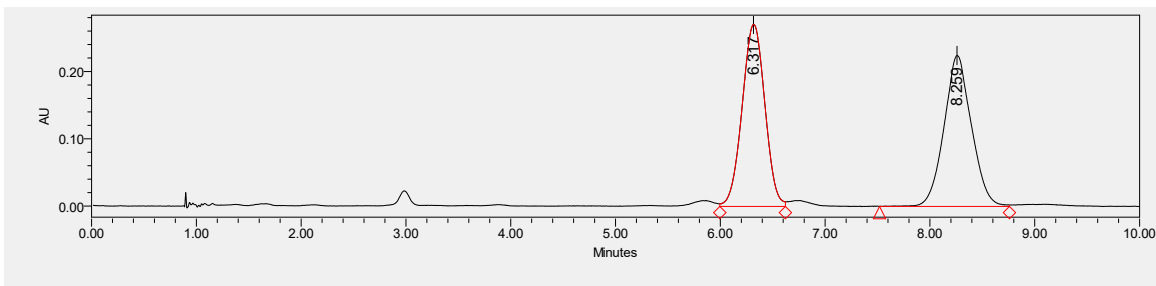

| Entry | Retention Time | Area    | % Area |
|-------|----------------|---------|--------|
| 1     | 6.317          | 4971026 | 50.34  |
| 2     | 8.259          | 4903171 | 49.66  |



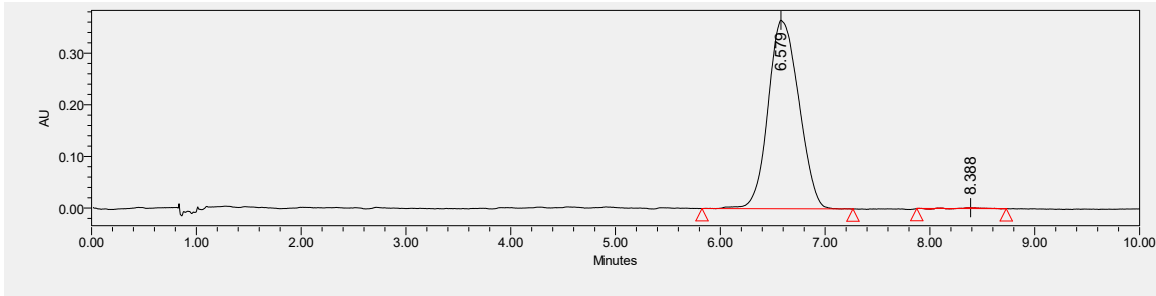

| Entry | Retention Time | Area    | % Area |
|-------|----------------|---------|--------|
| 1     | 6.579          | 7426376 | 99.58  |
| 2     | 8.388          | 31513   | 0.42   |

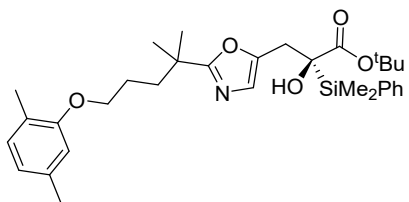

***Tert*-butyl (*R*)-2-(dimethyl(phenyl)silyl)-3-(2-(5-(2,5-dimethylphenoxy)-2-methylpentan-2-yl)oxazol-5-yl)-2-hydroxypropanoate (C44)**

(C<sub>32</sub>H<sub>45</sub>NO<sub>5</sub>Si) 46.4 mg, 84% yield, 99% ee; Colorless oil; R<sub>f</sub> = 0.4 (petroleum ether/ethyl acetate = 7:1). [α]<sub>D</sub><sup>23</sup> = -18.0 (c = 1.16, in CH<sub>2</sub>Cl<sub>2</sub>). Dissolved in *i*-PrOH for **HPLC** (Daicel Chiralpak **IA**, *i*-PrOH/*n*-hexane = 5/95, flow rate = 1.0 mL/min, λ = 210 nm), retention time: tr (major) = 8.27 min, tr (minor) = 9.33 min.

**<sup>1</sup>H NMR** (400 MHz, CDCl<sub>3</sub>) δ 7.65 – 7.58 (m, 2H), 7.45 – 7.33 (m, 3H), 6.99 (d, *J* = 7.6 Hz, 1H), 6.69 (s, 1H), 6.65 (d, *J* = 7.6 Hz, 1H), 6.58 (s, 1H), 3.86 (t, *J* = 6.0 Hz, 2H), 3.20 – 3.12 (m, 2H), 3.08 – 2.96 (m, 1H), 2.30 (s, 3H), 2.16 (s, 3H), 1.85 – 1.79 (m, 2H), 1.66 – 1.57 (m, 2H), 1.35 (s, 6H), 1.31 (s, 9H), 0.46 (d, *J* = 11.2 Hz, 6H).

**<sup>13</sup>C NMR** (101 MHz, CDCl<sub>3</sub>) δ 175.7, 169.5, 157.1, 148.0, 136.6, 134.8, 134.7, 130.4, 130.0, 127.9, 124.2, 123.7, 120.7, 112.1, 82.7, 72.0, 68.0, 38.4, 36.9, 31.9, 28.1, 26.5, 26.4, 25.1, 21.6, 15.9, -5.2, -5.3.

**ESI-HRMS**: calcd for C<sub>32</sub>H<sub>46</sub>NO<sub>5</sub>Si<sup>+</sup> ([M + H]<sup>+</sup>) = 552.3140, found: 552.3146.

**IR** (neat): 2972, 1710, 1557, 1509, 1458, 1369, 1252, 1156, 1129, 1066, 836, 809, 783, 701 cm<sup>-1</sup>.

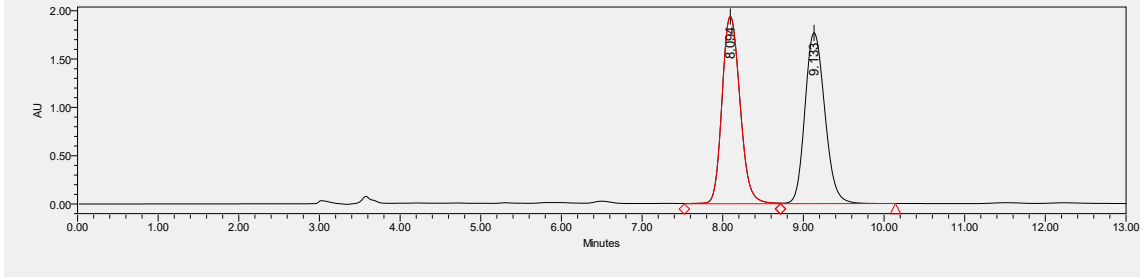

| Entry | Retention Time | Area     | % Area |
|-------|----------------|----------|--------|
| 1     | 8.094          | 30027675 | 49.87  |
| 2     | 9.133          | 30188215 | 50.13  |

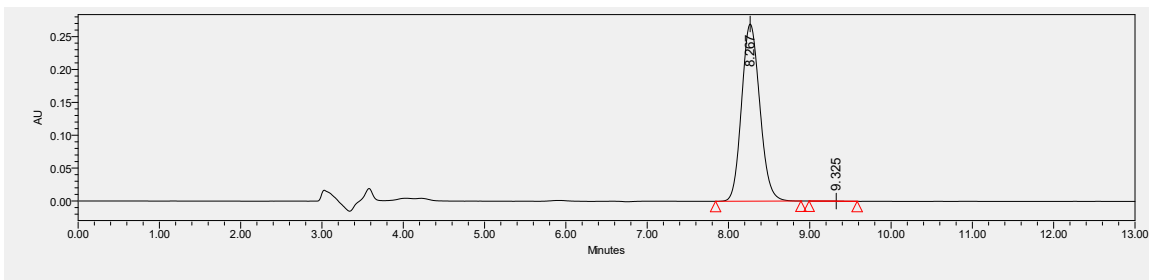

| Entry | Retention Time | Area    | % Area |
|-------|----------------|---------|--------|
| 1     | 8.267          | 4183849 | 99.96  |
| 2     | 9.325          | 1529    | 0.04   |

## 10. References

- 1 (a) Z. P. Yu, X. H. Liu, Z. H. Dong, M. S. Xie and X. M. Feng, *Angew. Chem. Int. Ed.*, 2008, **47**, 1308-1311; (b) X. Zhou, D. J. Shang, Q. Zhang, L. L. Lin, X. H. Liu and X. M. Feng, *Org. Lett.*, 2009, **11**, 1401-1404.
- 2 (a) D. A. Nicewicz and J. S. Johnson, *J. Am. Chem. Soc.*, 2005, **127**, 6170-6171; (b) C. Bolm, A. Kasyan, P. Heider, S. Saladin, K. Drauz, K. Günther and C. Wagner, *Org. Lett.*, 2002, **4**, 2265-2267; (c) M. M. Guan, S. Y. Wang, Y. Luo, W. D. Cao, X. H. Liu and X. M. Feng, *Chem. Sci.* 2021, **12**, 7498-7503.
- 3 W. D. Cao, D. Tan, R. Lee and C. H. Tan, *J. Am. Chem. Soc.* 2018, **140**, 1952-1955.
- 4 S. A. Weicker and D. W. Stephan, *Chem. Eur. J.* 2015, **21**, 13027-13034.
- 5 (a) S. K. Ray, M. M. Sadhu, R. G. Biswas, R. A. Unhale and V. K. Singh, *Org. Lett.*, 2019, **21**, 417-422; (b) J. Kim and E. J. Yoo, *Org. Lett.* 2021, **23**, 4256-4260.
- 6 (a) G. C. Senadi, W. P. Hu, J. S. Hsiao, J. K. Vandavasi, C.Y. Chen, and J. J. Wang, *Org. Lett.*, 2012, **14**, 4478-4481. (b) J. P. Weyrauch, A. S. Hashmi, A. Schuster, T. Hengst, S. Schetter, A. Littmann, M. Rudolph, M. Hamzic, J. Visus, F. Rominger, W. Frey, J. W. Bats, *Chem. Eur. J.* 2010, **16**, 956-963; (c) G. Z. Dong, M. Bao, X. D. Xie, S. K. Jia, W. H. Hu and X. F. Xu, *Angew. Chem. Int. Ed.*, 2021, **60**, 1992-1999. (d) J. S. Poh, S. Makai, T. Von Keutz, D. N. Tran, C. Battilocchio, P. Pasau, and S. V. Ley, *Angew. Chem. Int. Ed.* 2017, **56**, 1864-1868; (e) F. Yu, Y. Z. Wang, Y. Hang, W. M. Tang, Z. F. Zhao, D. Oupický. *J. Polym. Sci., Part A: Polym. Chem.* 2019, **57**, 2235-2242. (f) Q. Wang, J. N. Jin, X. Chen, X. G. Wang, B. S. Zhang, J. W. Ma, and Y. M. Liang, *J. Org. Chem.* 2018, **83**, 14626-14636. (g) B. J. Lim, I. Hwang, A. D. Ellington and J. L. Sessler, *Helv. Chim. Acta* 2019, **102**, e1800186. (h) F. S. He, P. Bao, F. Yu, L. H. Zeng, W. P. Deng and J. Wu, *Org. Lett.*, 2021, **23**, 7472-7476.
- 7.....Y. H. Mo, Q. Y. Chen, J. Z. Li, D. Ye, Y. Q. Zhou, S. X. Dong, X. H. Liu, and X. M. Feng, *ACS Catal.*, 2023, **13**, 877-886.
- 8.....(a) G. C. Welch, L. Cabrera, P. A. Chase, E. Hollink, J. D. Masuda, P. Wei and D. W. Stephan, *Dalton Trans.*, 2007, 3407-3414; (b) J. J. Tian, N. Liu, Q. F. Liu, W. Sun and X. C. Wang, *J. Am. Chem. Soc.*, 2021, **143**, 3054-3059.

# 11. Copies of the NMR spectra for new compounds

A2

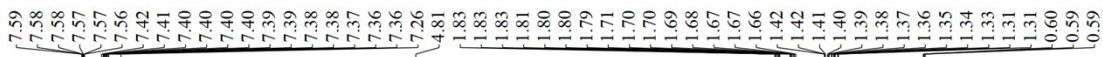

| Parameters               |                            |       |
|--------------------------|----------------------------|-------|
| Parameter                |                            | Value |
| 1 Title                  | sangxp-20220427-203.4.1.1r |       |
| 2 Solvent                | CDCl3                      |       |
| 3 Temperature            | 295.4                      |       |
| 4 Number of Scans        | 16                         |       |
| 5 Spectrometer Frequency | 400.18                     |       |
| 6 Nucleus                | 1H                         |       |

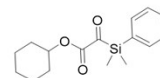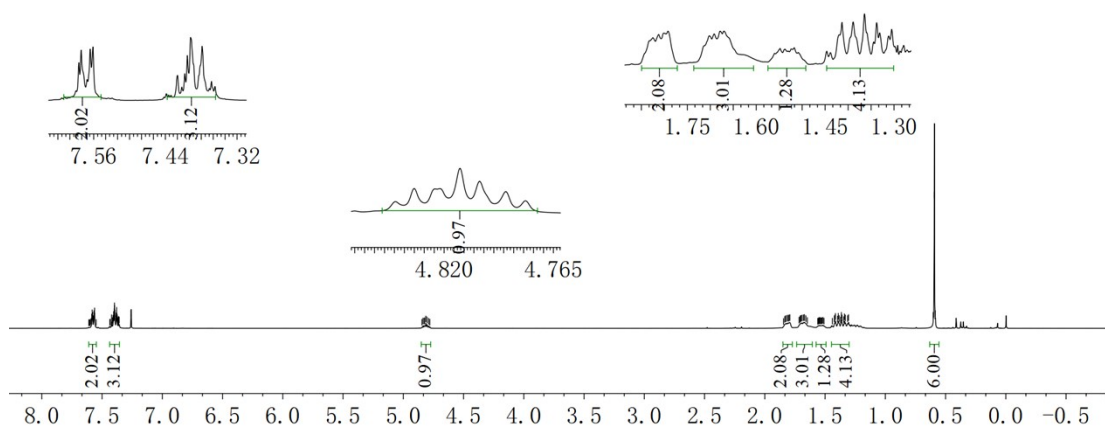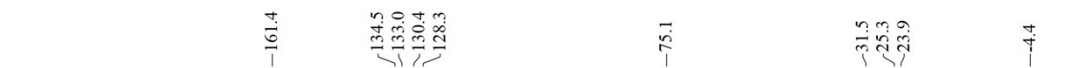

| Parameters               |                            |       |
|--------------------------|----------------------------|-------|
| Parameter                |                            | Value |
| 1 Title                  | sangxp-20220427-203.6.1.1r |       |
| 2 Solvent                | CDCl3                      |       |
| 3 Temperature            | 296.0                      |       |
| 4 Number of Scans        | 256                        |       |
| 5 Spectrometer Frequency | 100.63                     |       |
| 6 Nucleus                | 13C                        |       |

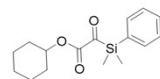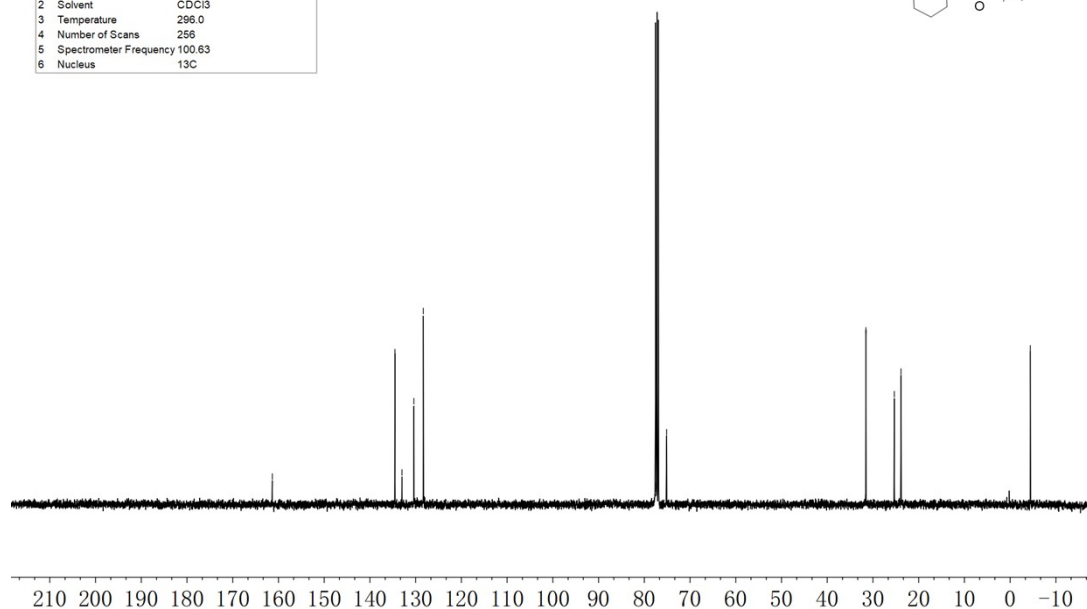

A4

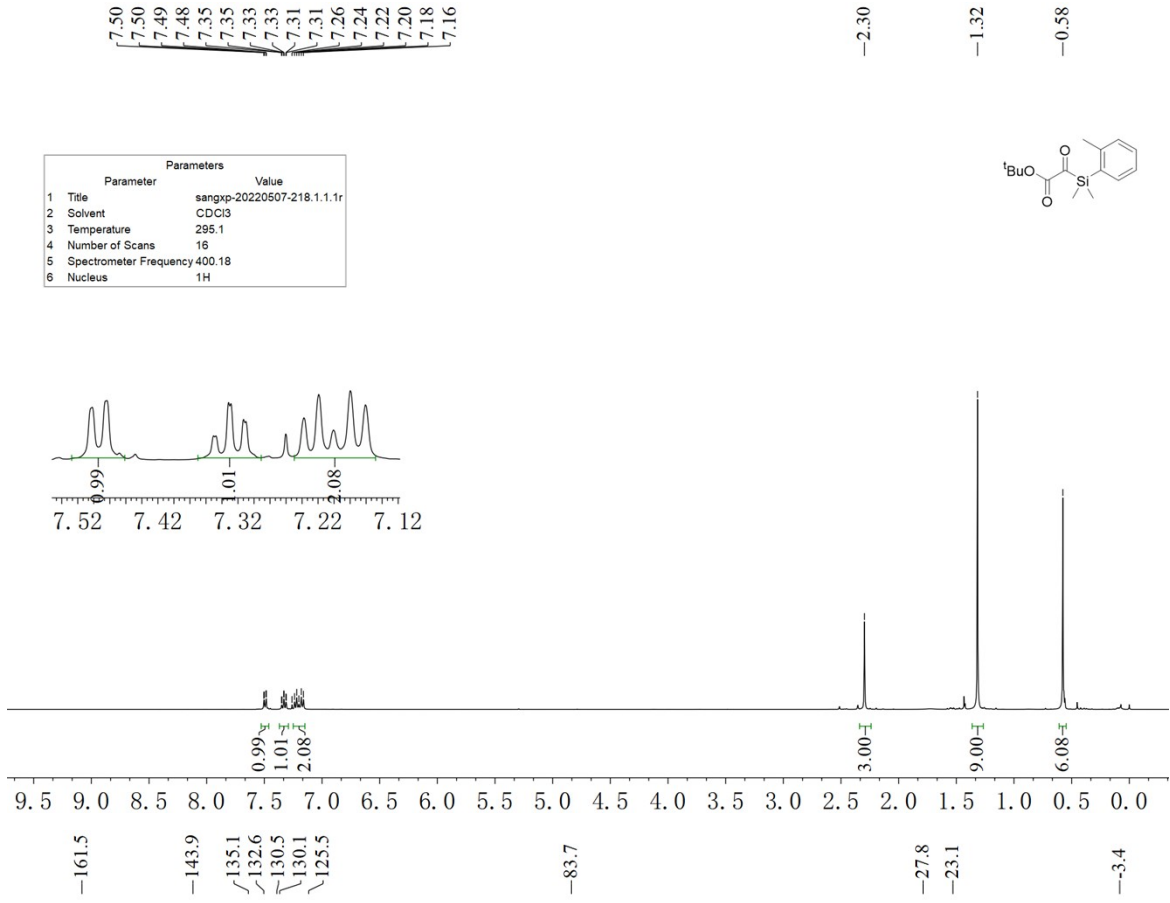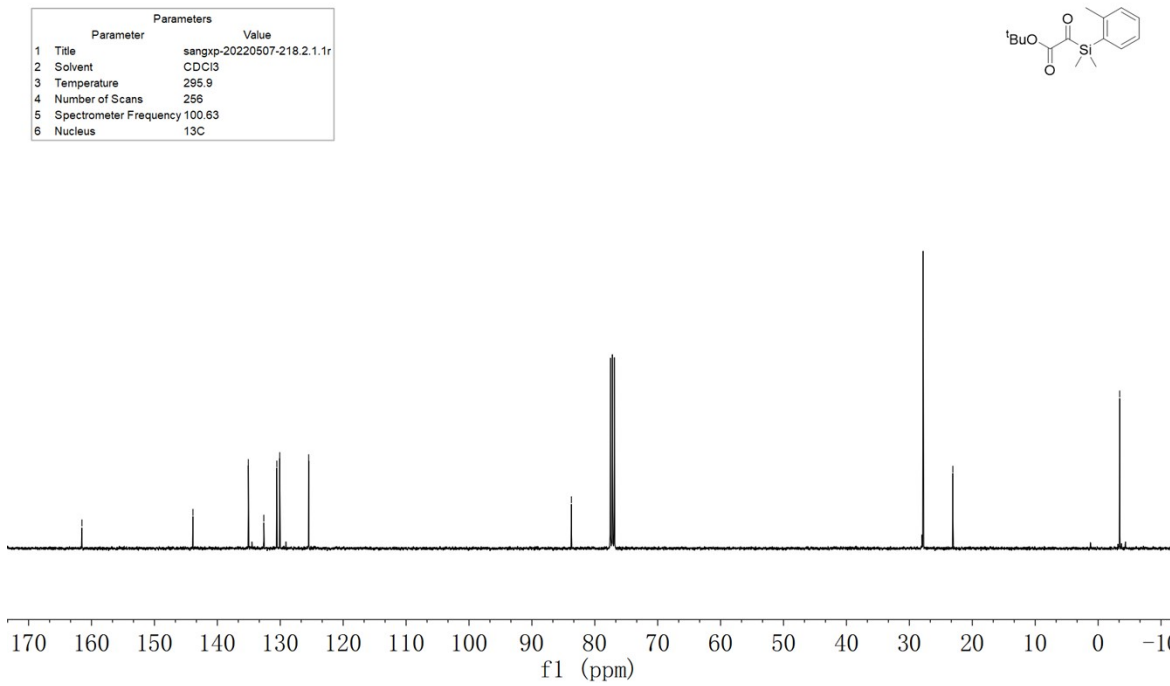

A5

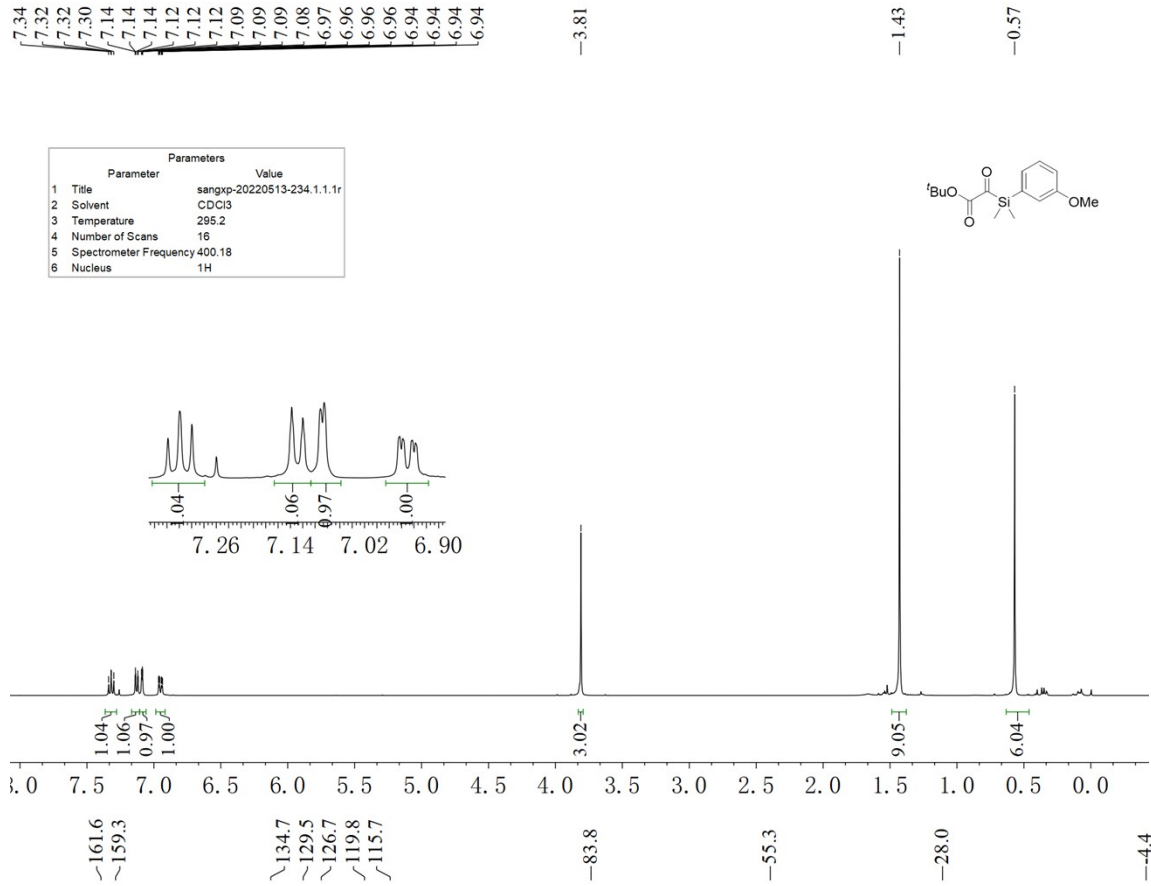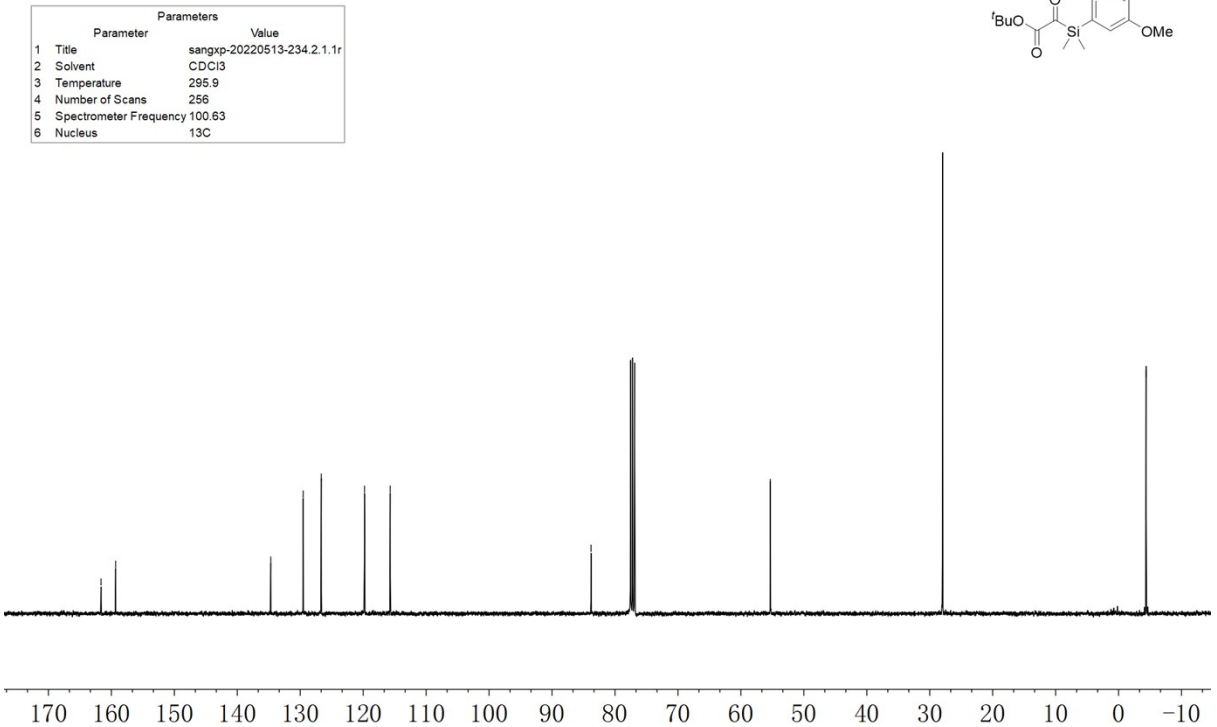

A6

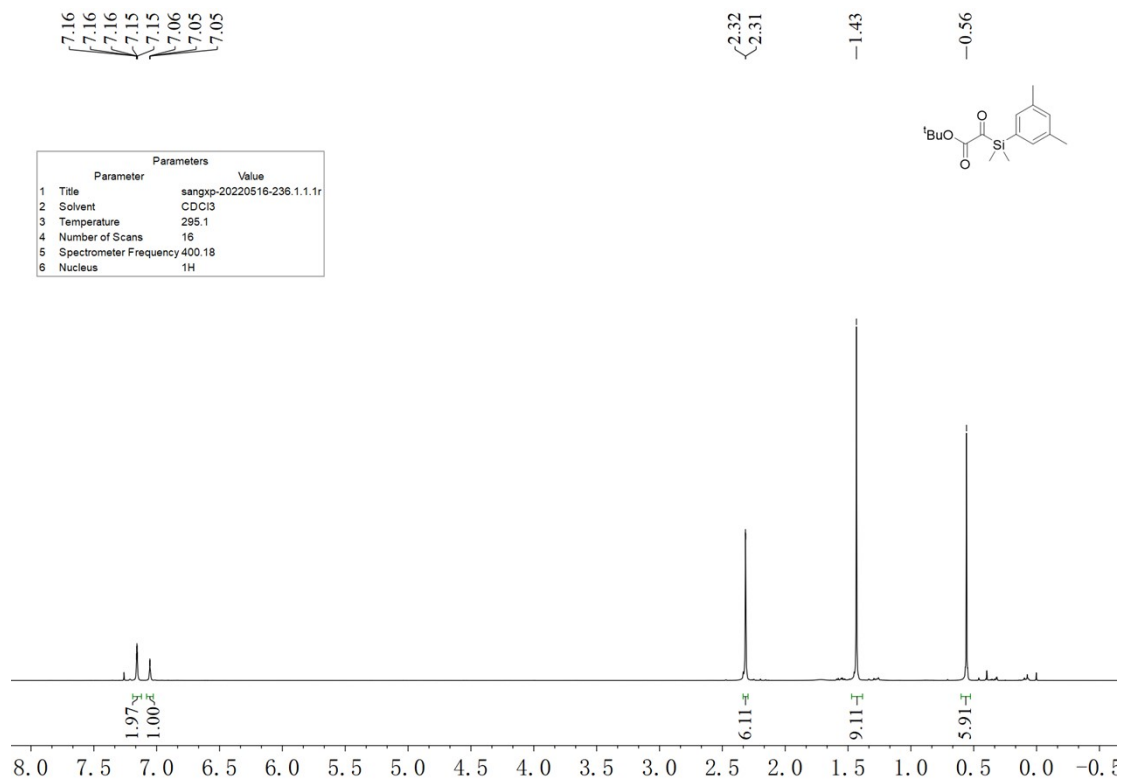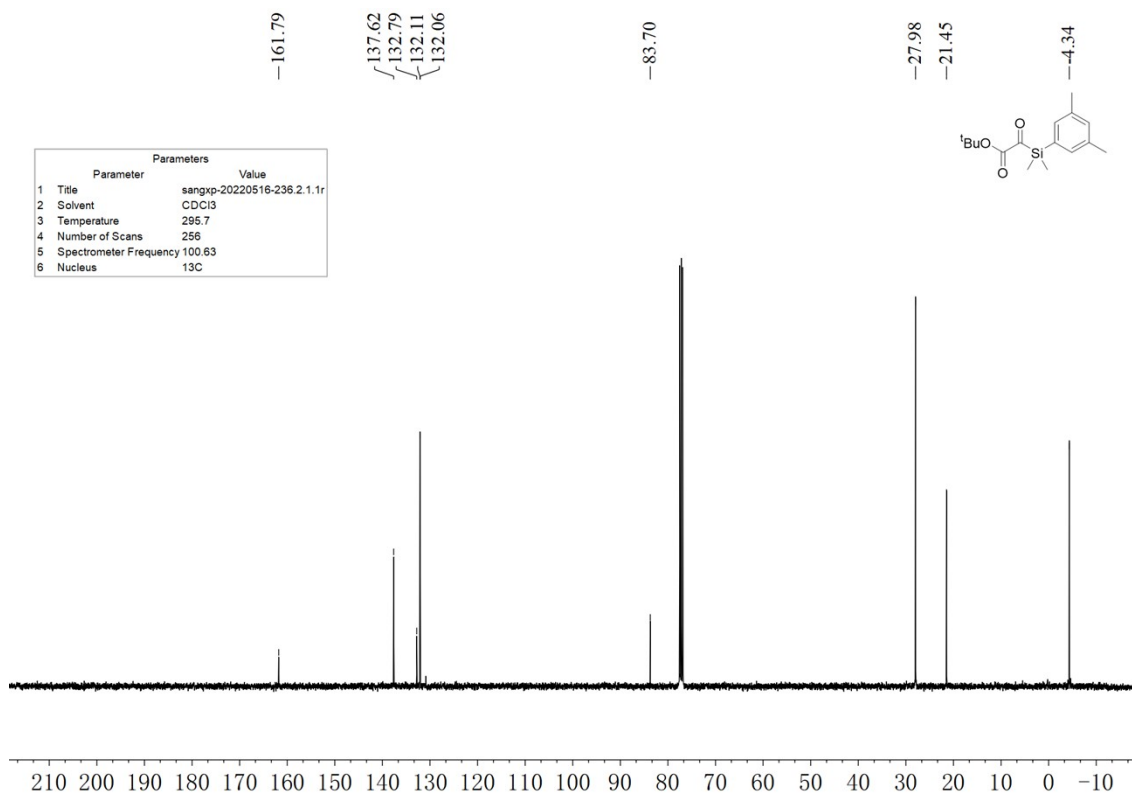

**B25**

7.90  
7.89  
7.88  
7.73  
7.72  
7.71  
7.51  
7.26

4.16  
4.16  
4.15  
4.14

3.02  
3.01  
3.00  
3.00  
2.98

2.21  
2.20  
2.20  
1.97  
1.50  
1.48  
1.46  
1.45  
1.43  
1.41  
0.80  
0.78  
0.76

| Parameters               |          |  |
|--------------------------|----------|--|
| Parameter                | Value    |  |
| 1 Title                  | pdata/ 1 |  |
| 2 Solvent                | CDCl3    |  |
| 3 Temperature            | 295.0    |  |
| 4 Number of Scans        | 16       |  |
| 5 Spectrometer Frequency | 400.18   |  |
| 6 Nucleus                | 1H       |  |

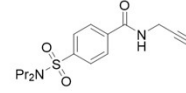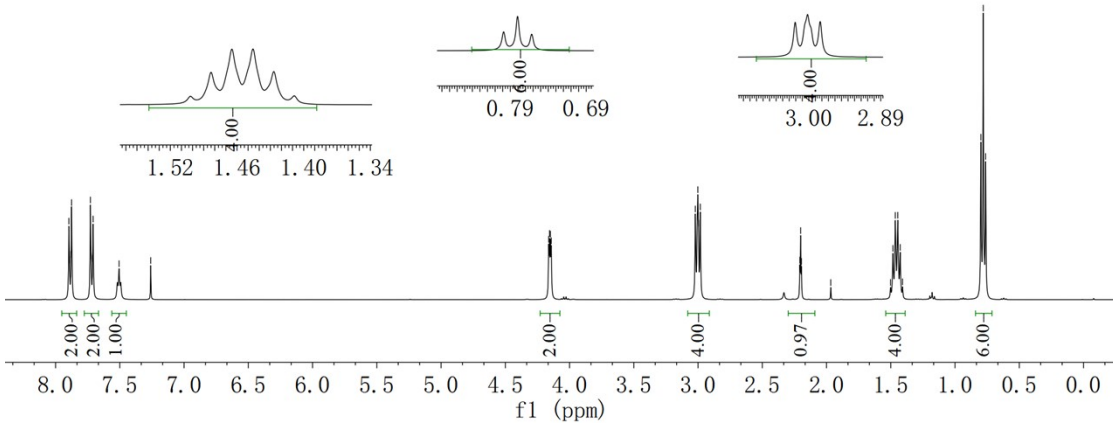

-166.1  
-142.7  
-137.3  
-128.1  
-127.1  
-79.3  
-71.6  
-49.9  
-29.7  
-21.9  
-11.1

| Parameters               |          |  |
|--------------------------|----------|--|
| Parameter                | Value    |  |
| 1 Title                  | pdata/ 1 |  |
| 2 Solvent                | CDCl3    |  |
| 3 Temperature            | 295.5    |  |
| 4 Number of Scans        | 256      |  |
| 5 Spectrometer Frequency | 100.63   |  |
| 6 Nucleus                | 13C      |  |

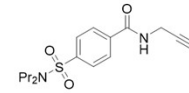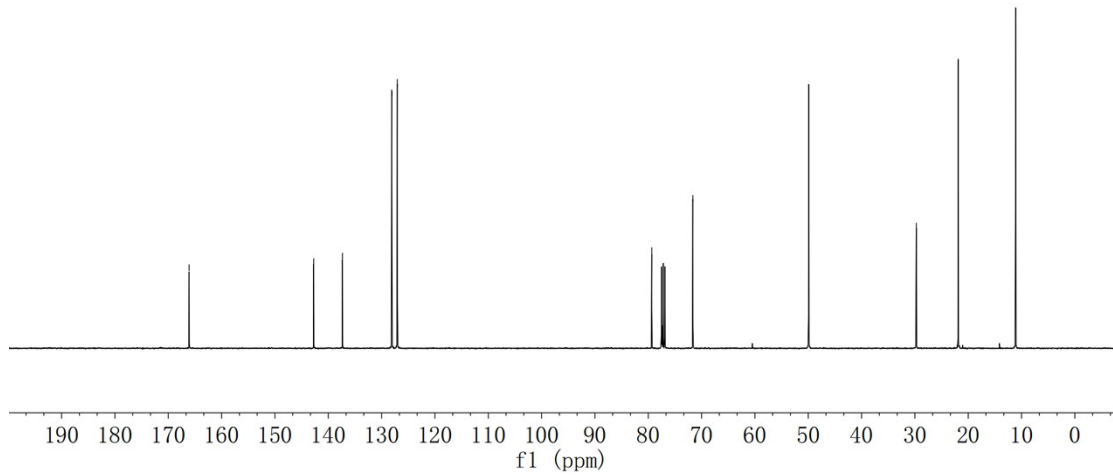



B26

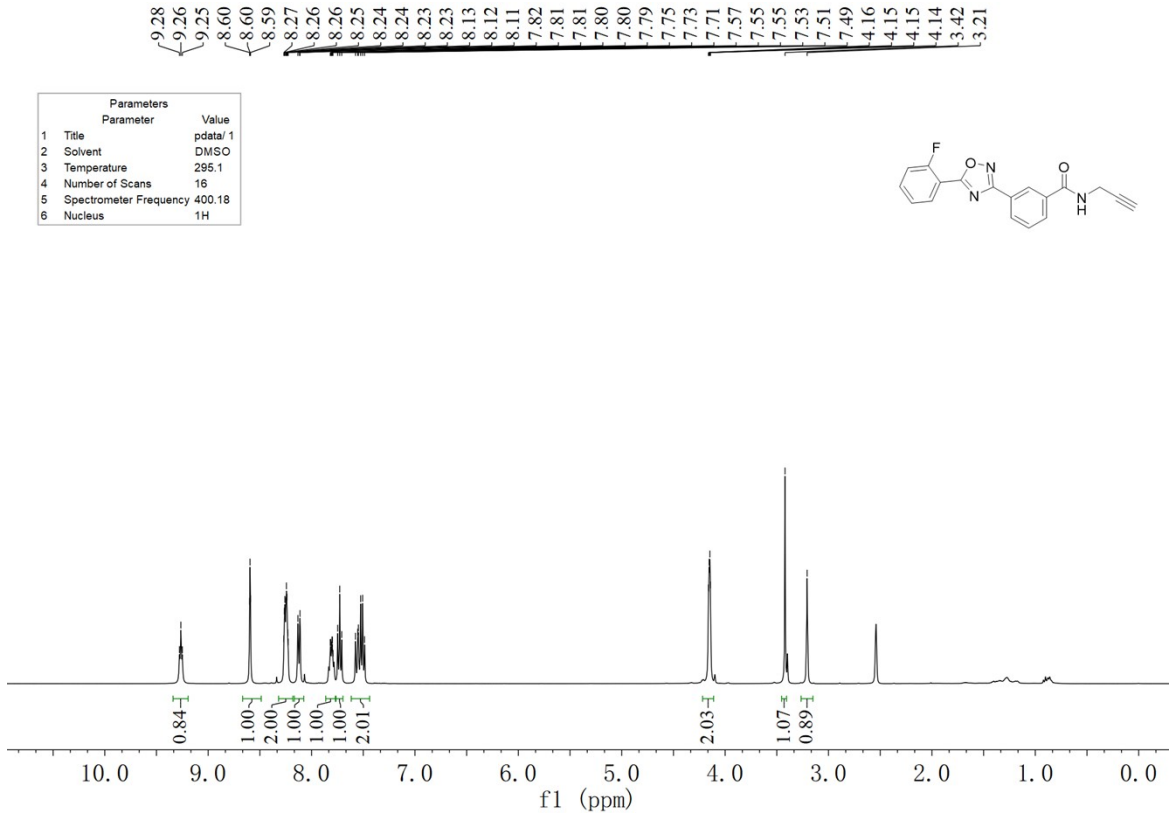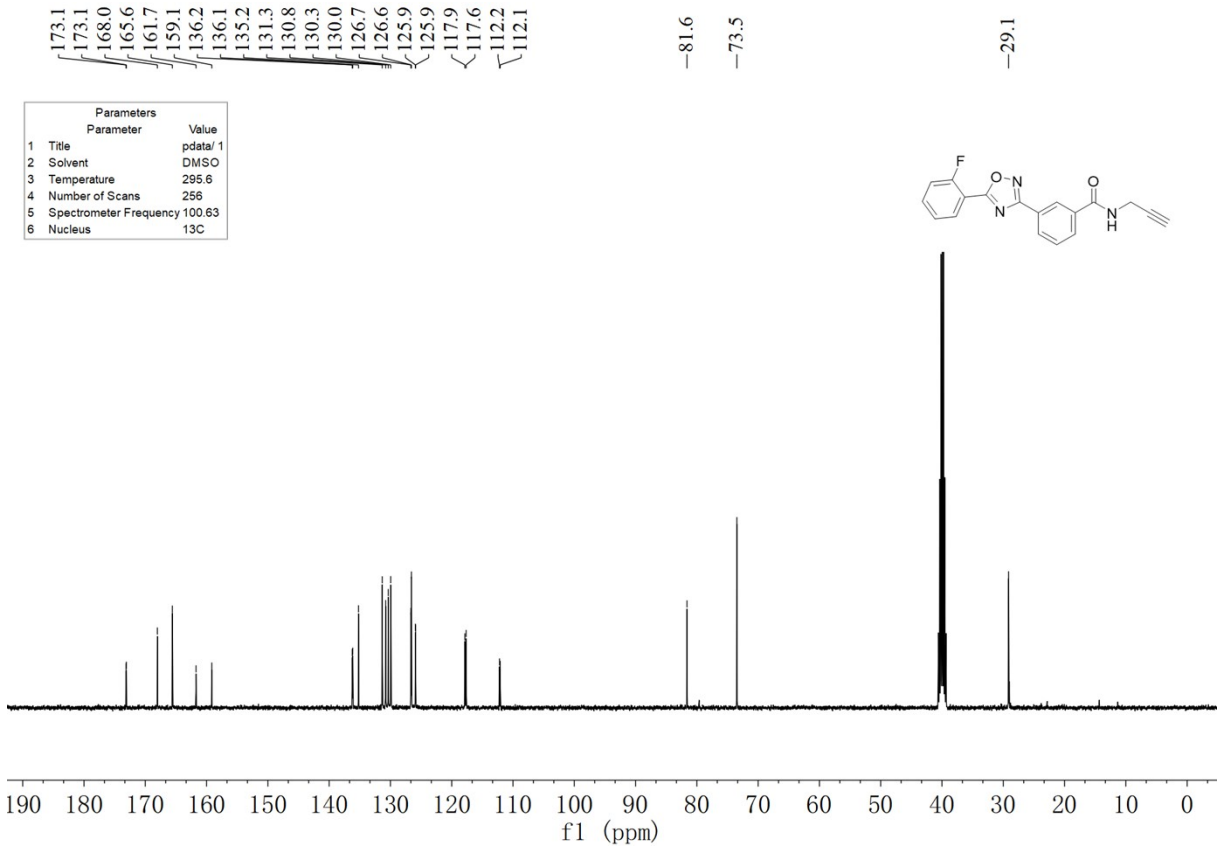



| Parameters               |          |  |
|--------------------------|----------|--|
| Parameter                | Value    |  |
| 1 Title                  | pdata/ 1 |  |
| 2 Solvent                | DMSO     |  |
| 3 Temperature            | 295.3    |  |
| 4 Number of Scans        | 16       |  |
| 5 Spectrometer Frequency | 376.55   |  |
| 6 Nucleus                | 19F      |  |

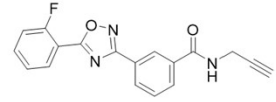

--109.31

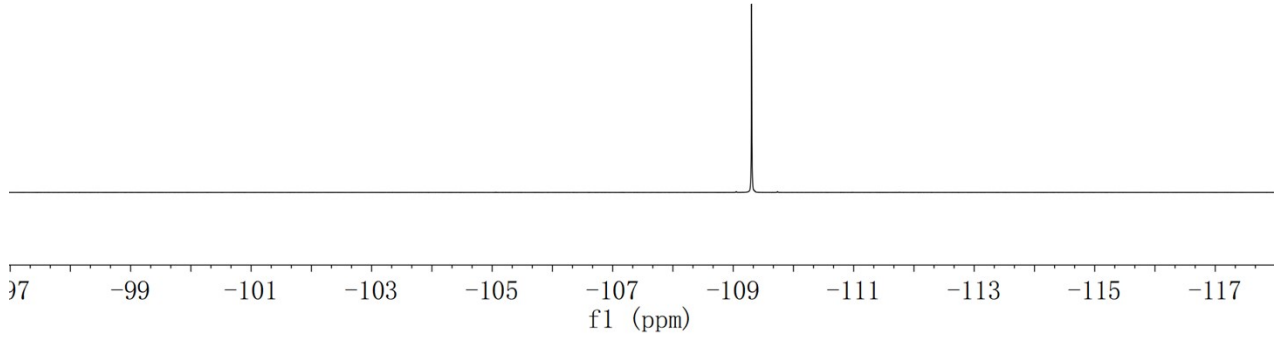

B27

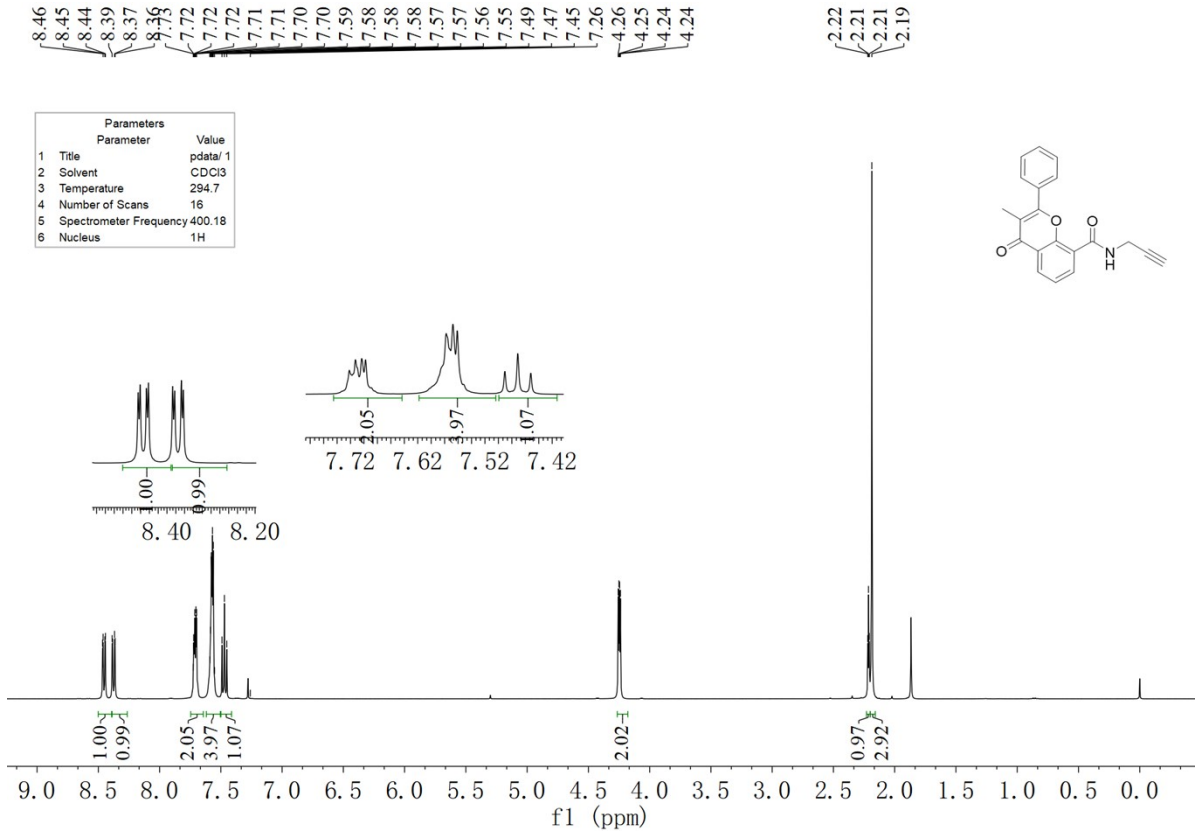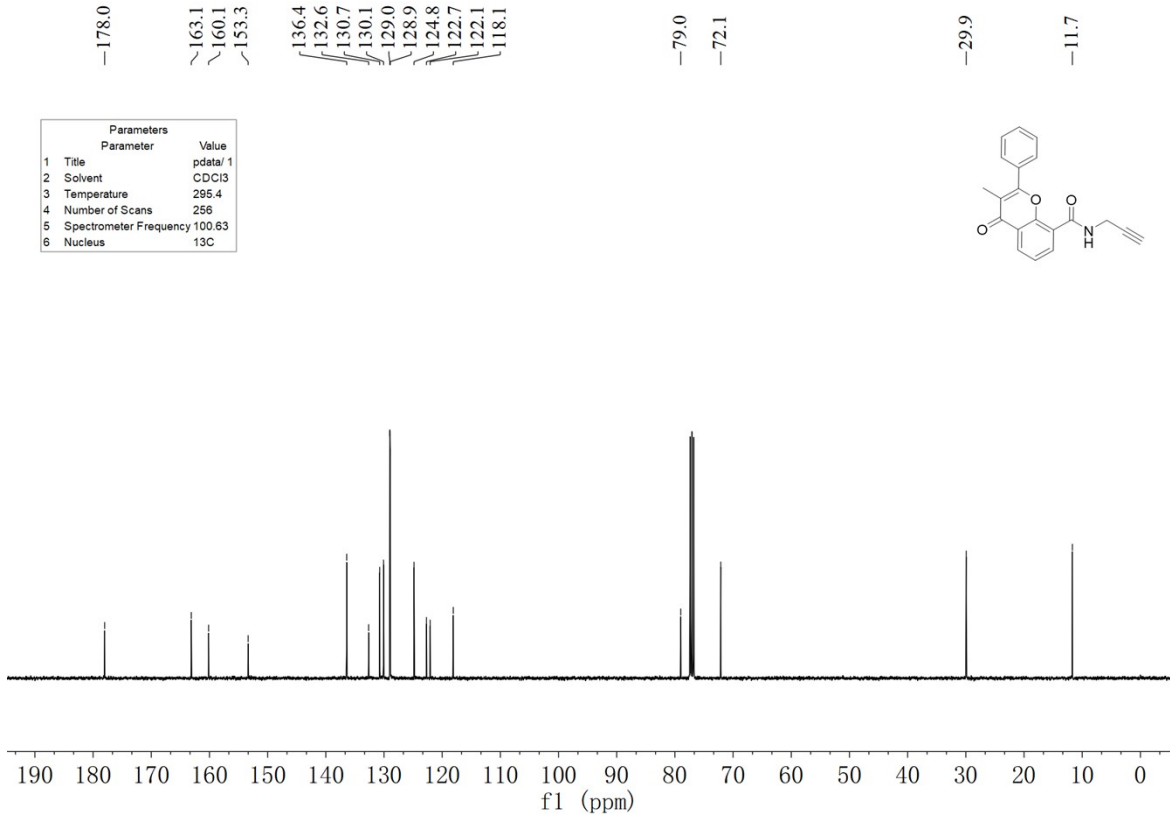

B33

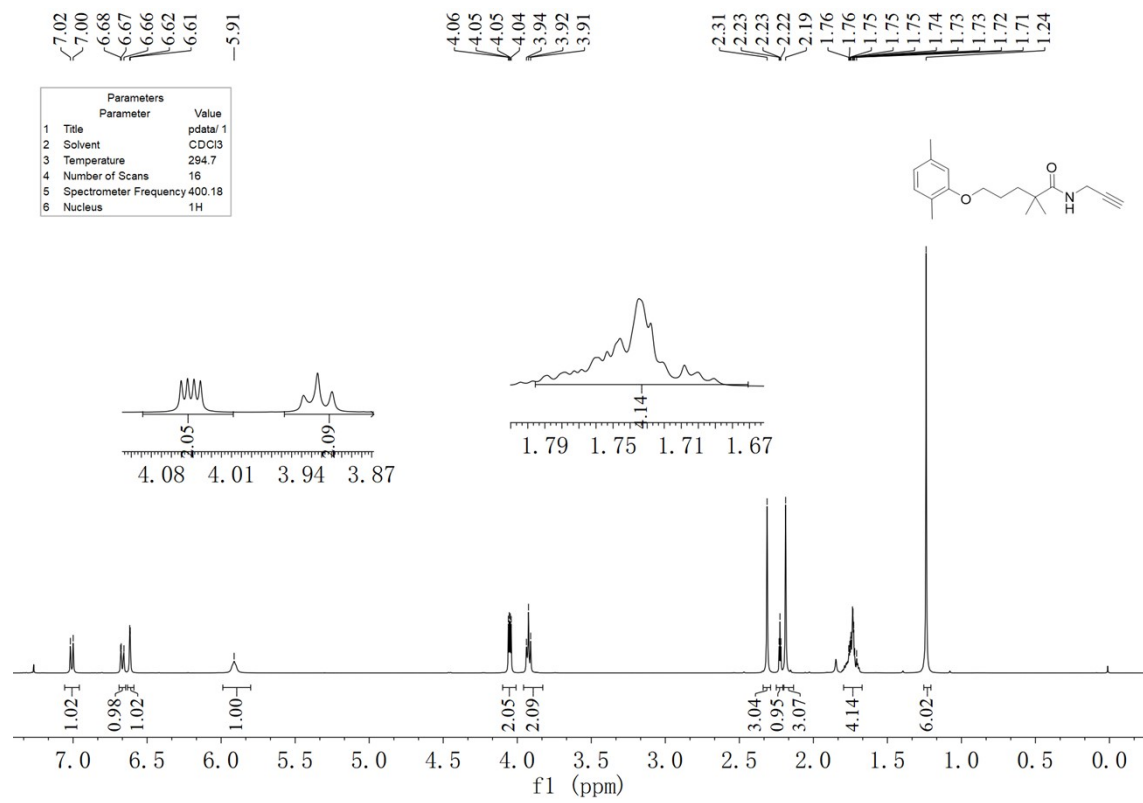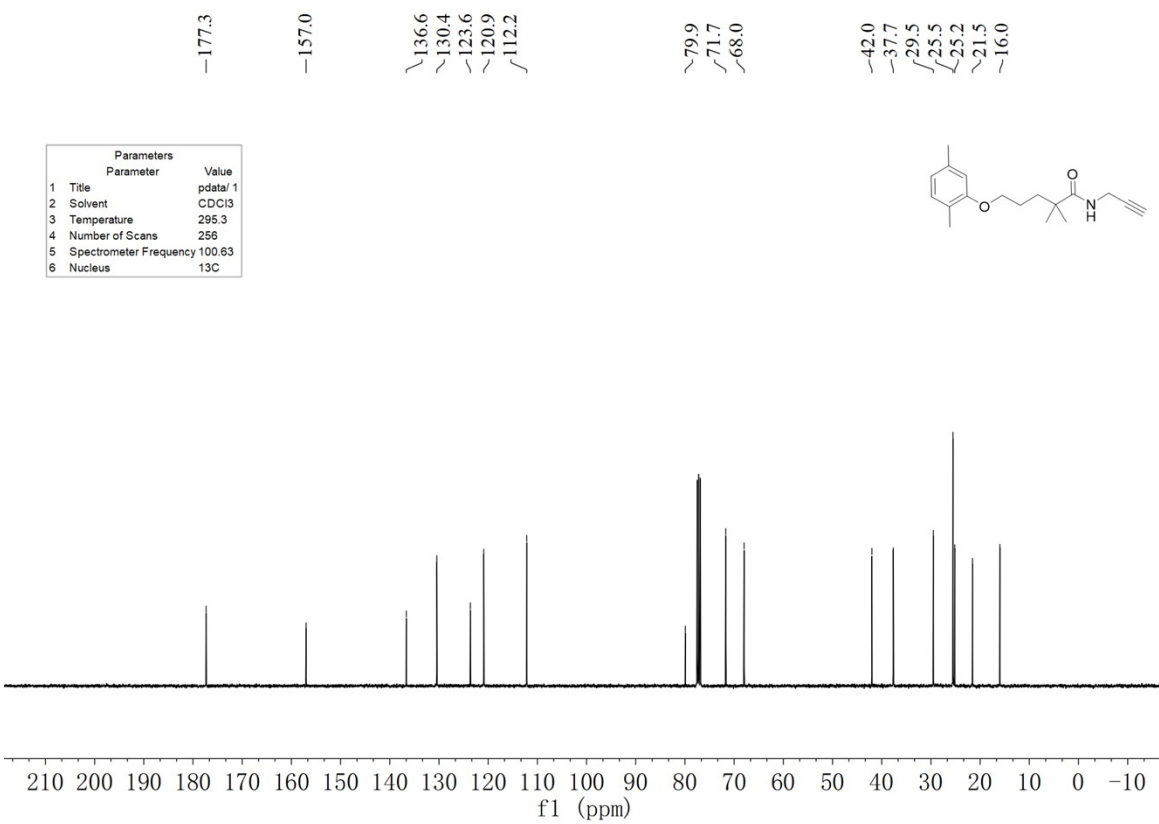

C1

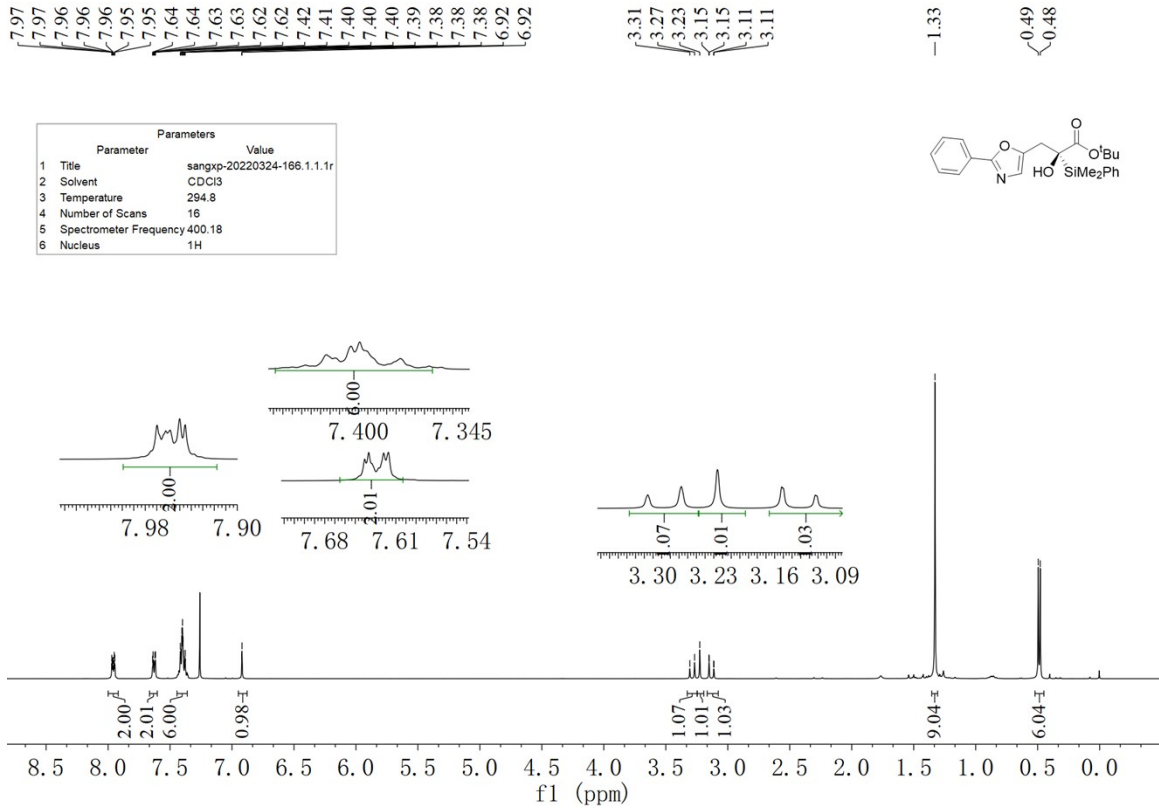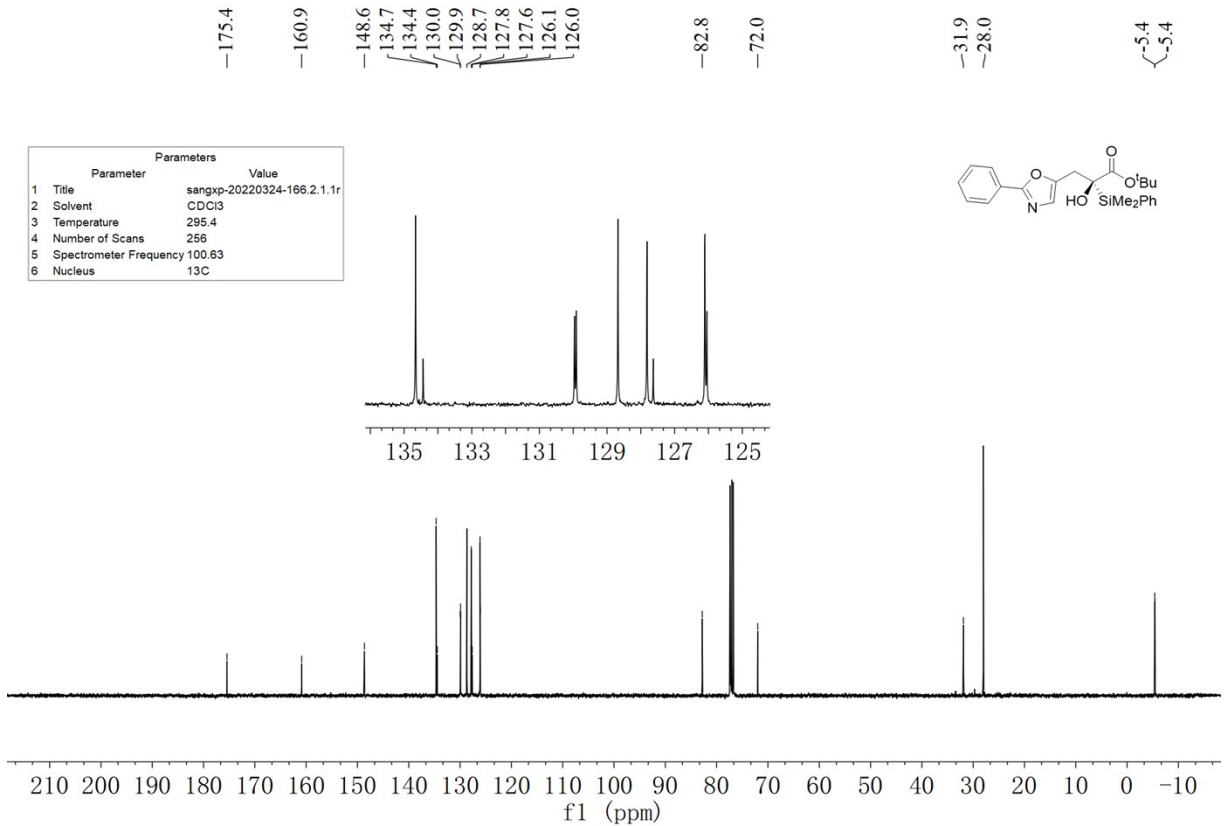

C2

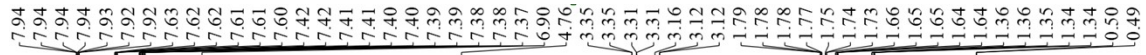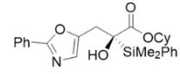

| Parameters               |                            |
|--------------------------|----------------------------|
| Parameter                | Value                      |
| 1 Title                  | sangxp-20220506-219.1.1.fr |
| 2 Solvent                | CDCl3                      |
| 3 Temperature            | 295.3                      |
| 4 Number of Scans        | 16                         |
| 5 Spectrometer Frequency | 400.18                     |
| 6 Nucleus                | 1H                         |

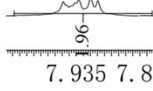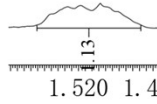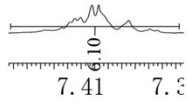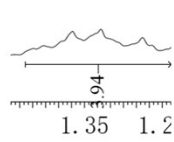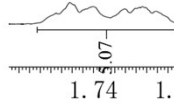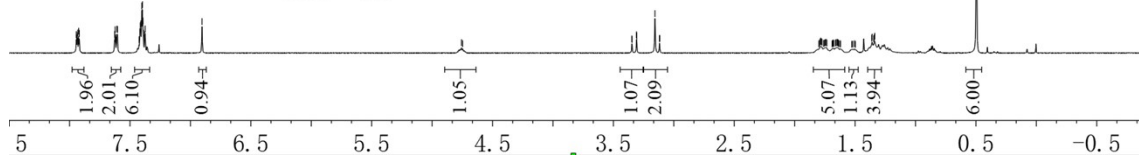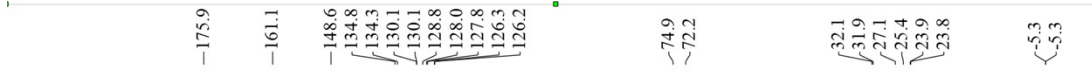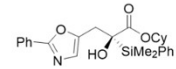

| Parameters               |                            |
|--------------------------|----------------------------|
| Parameter                | Value                      |
| 1 Title                  | sangxp-20220506-219.2.1.fr |
| 2 Solvent                | CDCl3                      |
| 3 Temperature            | 295.9                      |
| 4 Number of Scans        | 256                        |
| 5 Spectrometer Frequency | 100.63                     |
| 6 Nucleus                | 13C                        |

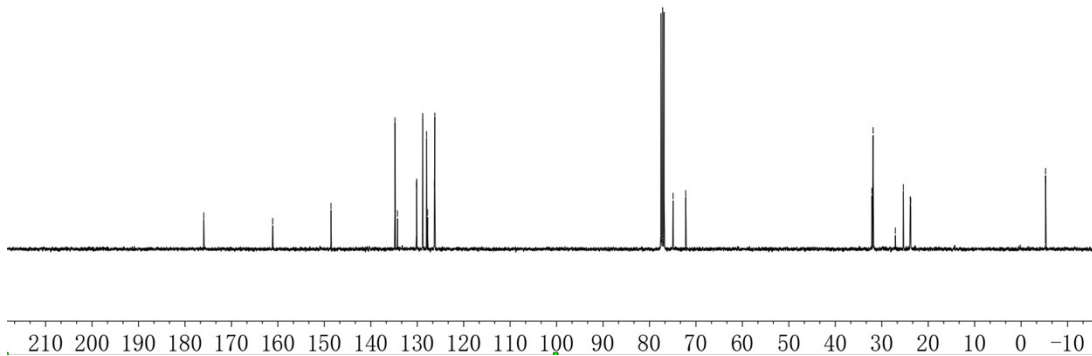

C3

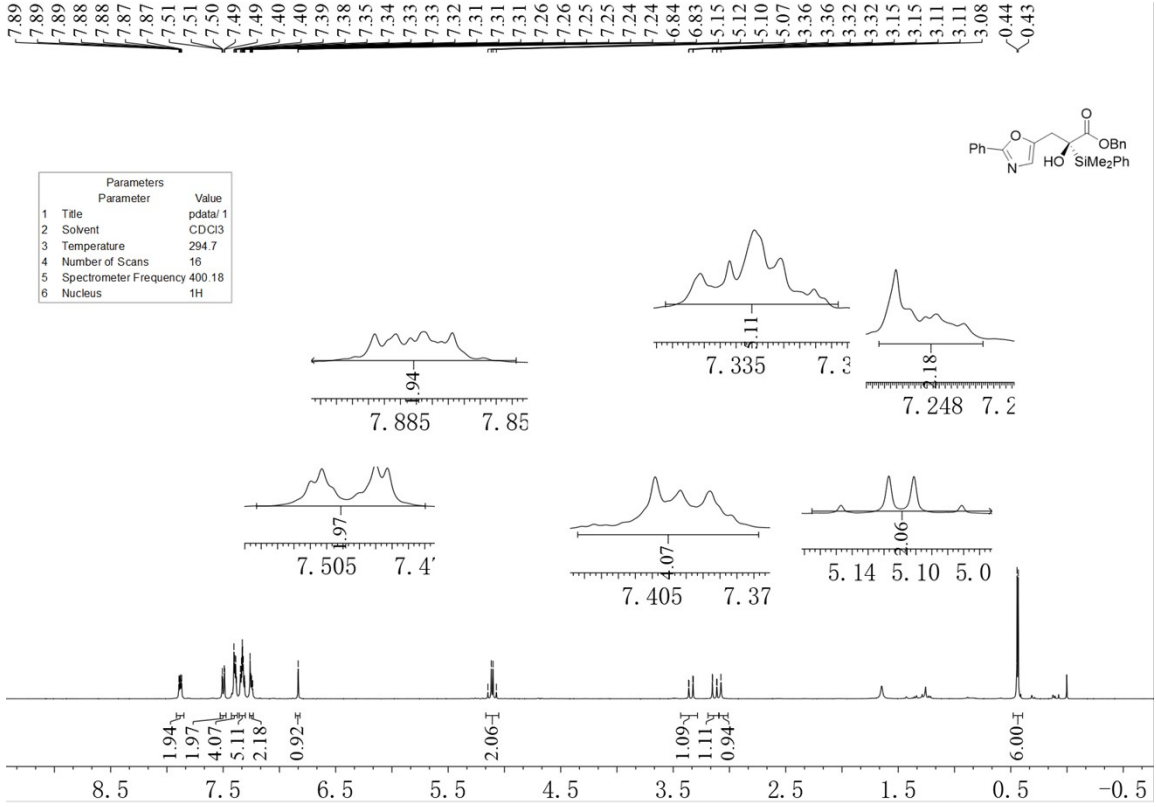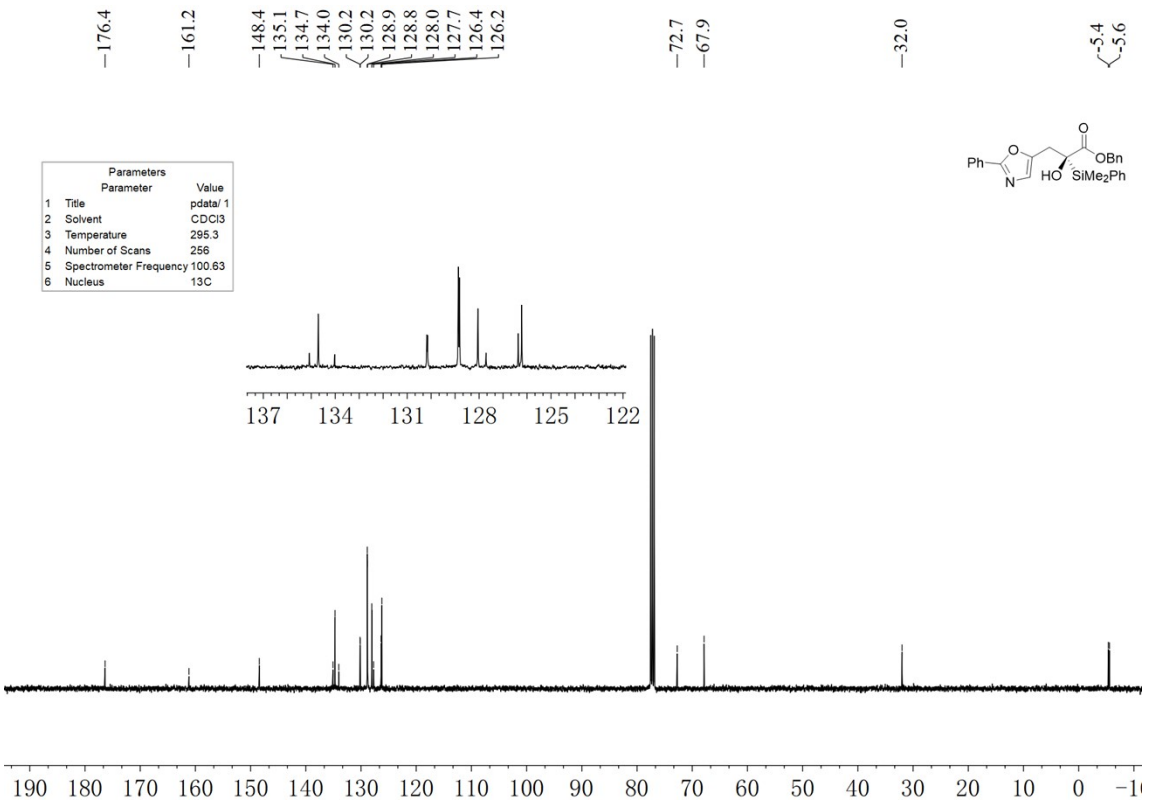



C4

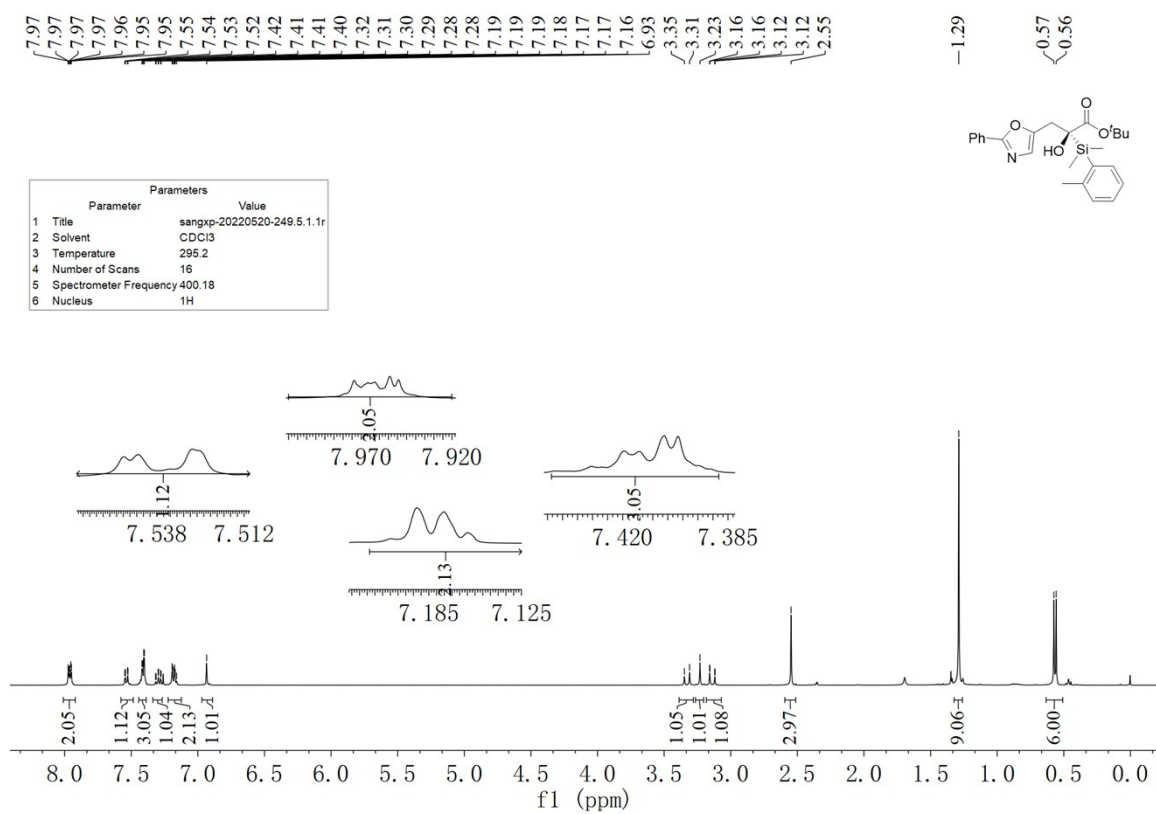

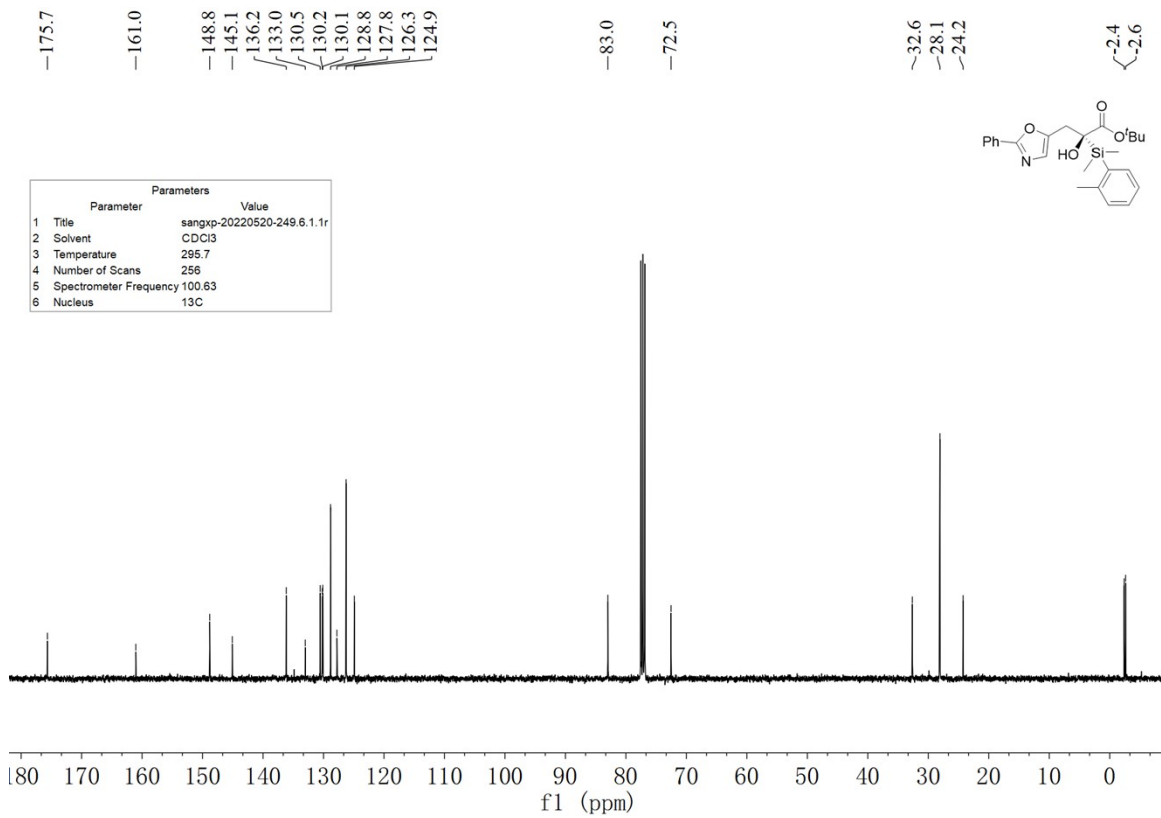

C5

7.97  
7.96  
7.96  
7.96  
7.95  
7.94  
7.43  
7.42  
7.42  
7.41  
7.40  
7.40  
7.39  
7.34  
7.32  
7.30  
7.21  
7.20  
7.20  
7.19  
7.19  
7.18  
7.17  
7.16  
7.16  
6.96  
6.95  
6.95  
6.95  
6.94  
6.93  
6.93  
6.92  
6.92  
6.91  
3.82  
3.30  
3.26  
3.22  
3.15  
3.15  
3.12  
3.11  
1.34  
0.48  
0.47

| Parameters               |                            |       |
|--------------------------|----------------------------|-------|
| Parameter                |                            | Value |
| 1 Title                  | sangxp-20220517-238.5.1.1r |       |
| 2 Solvent                | CDCl3                      |       |
| 3 Temperature            | 295.1                      |       |
| 4 Number of Scans        | 16                         |       |
| 5 Spectrometer Frequency | 400.18                     |       |
| 6 Nucleus                | 1H                         |       |

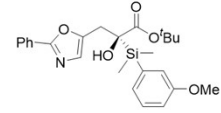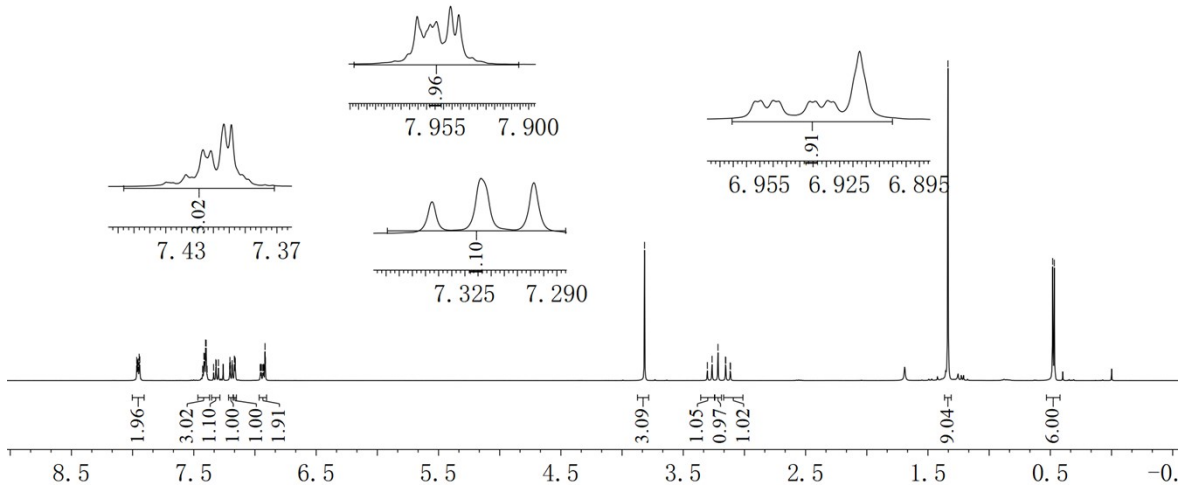

175.6  
161.0  
159.0  
148.8  
136.1  
130.1  
129.2  
128.8  
127.8  
127.1  
126.3  
126.2  
120.6  
115.0  
83.0  
72.1  
55.3  
32.1  
28.2  
5.2  
5.2

| Parameters               |                            |       |
|--------------------------|----------------------------|-------|
| Parameter                |                            | Value |
| 1 Title                  | sangxp-20220517-238.6.1.1r |       |
| 2 Solvent                | CDCl3                      |       |
| 3 Temperature            | 295.7                      |       |
| 4 Number of Scans        | 256                        |       |
| 5 Spectrometer Frequency | 100.63                     |       |
| 6 Nucleus                | 13C                        |       |

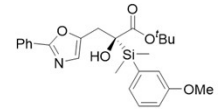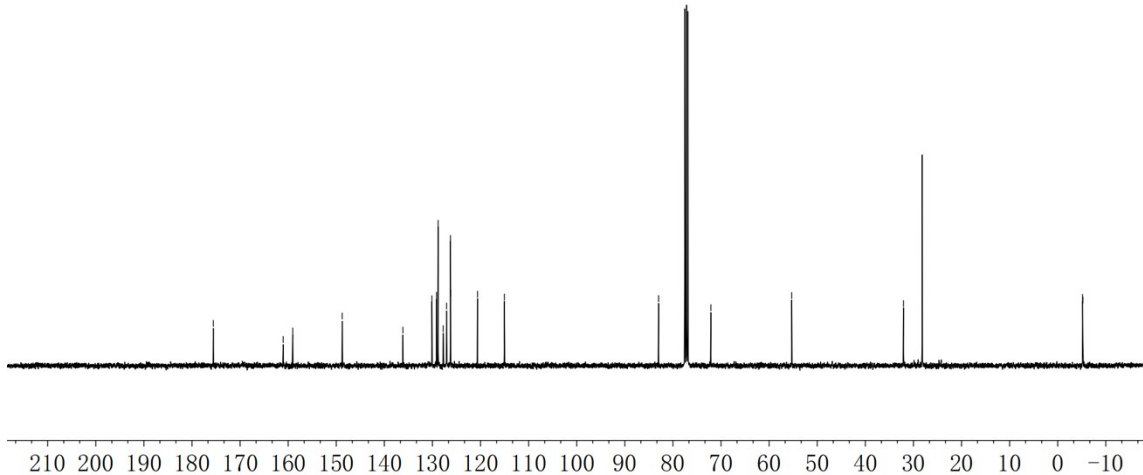

C6

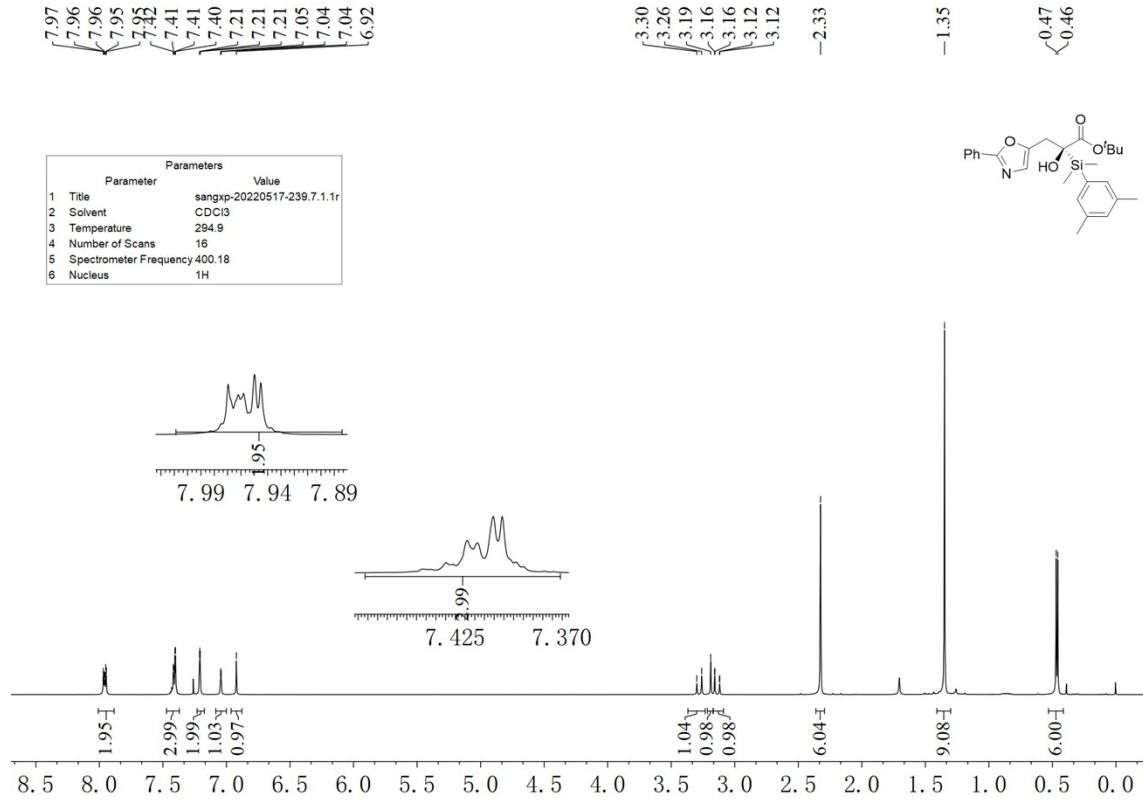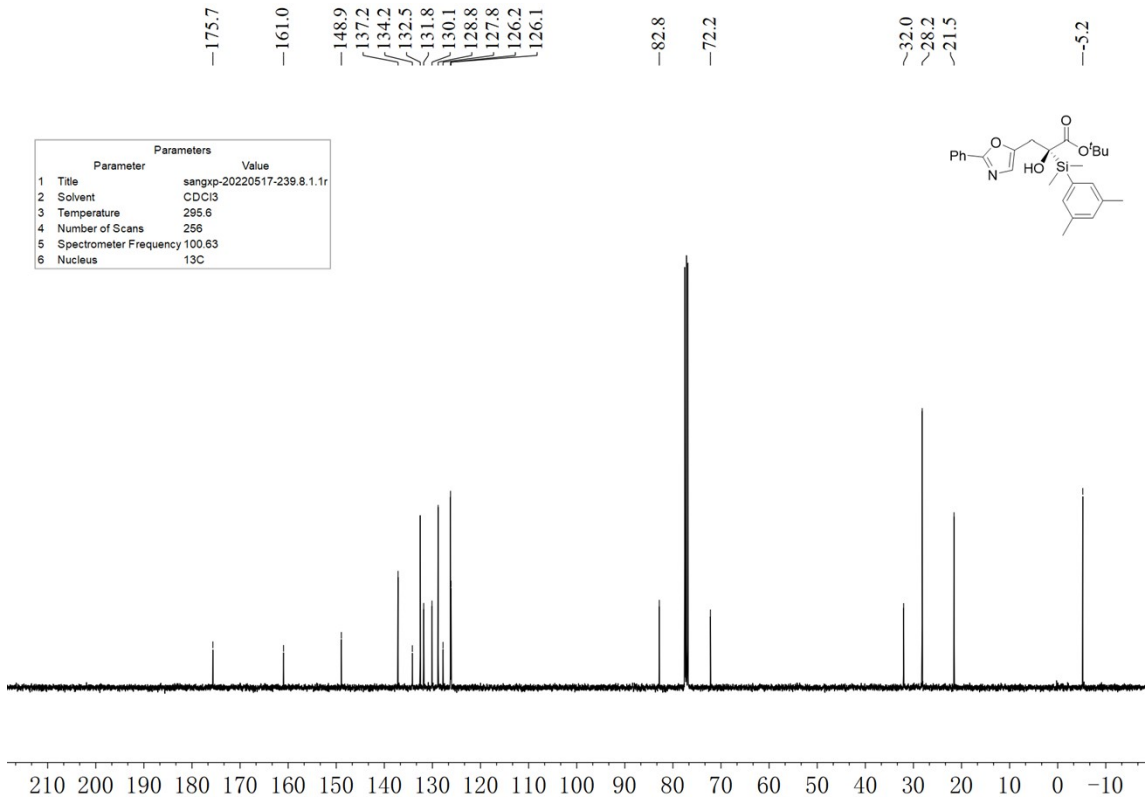

C7

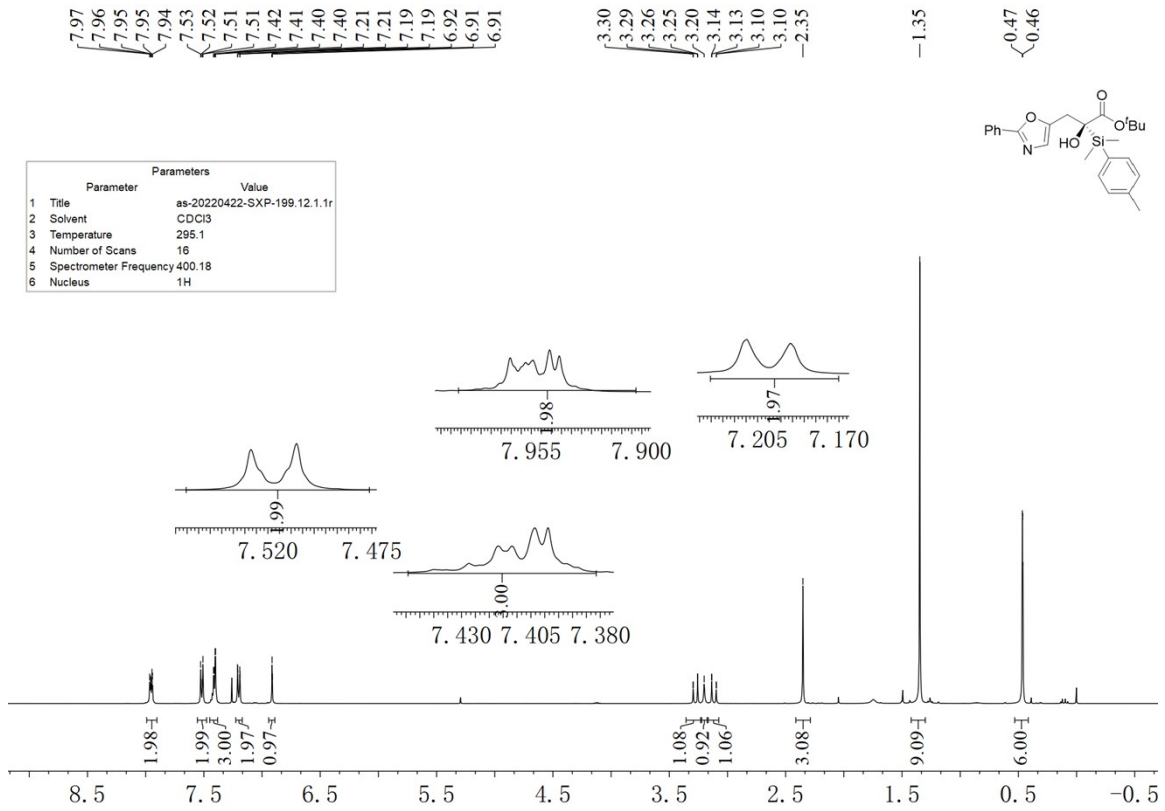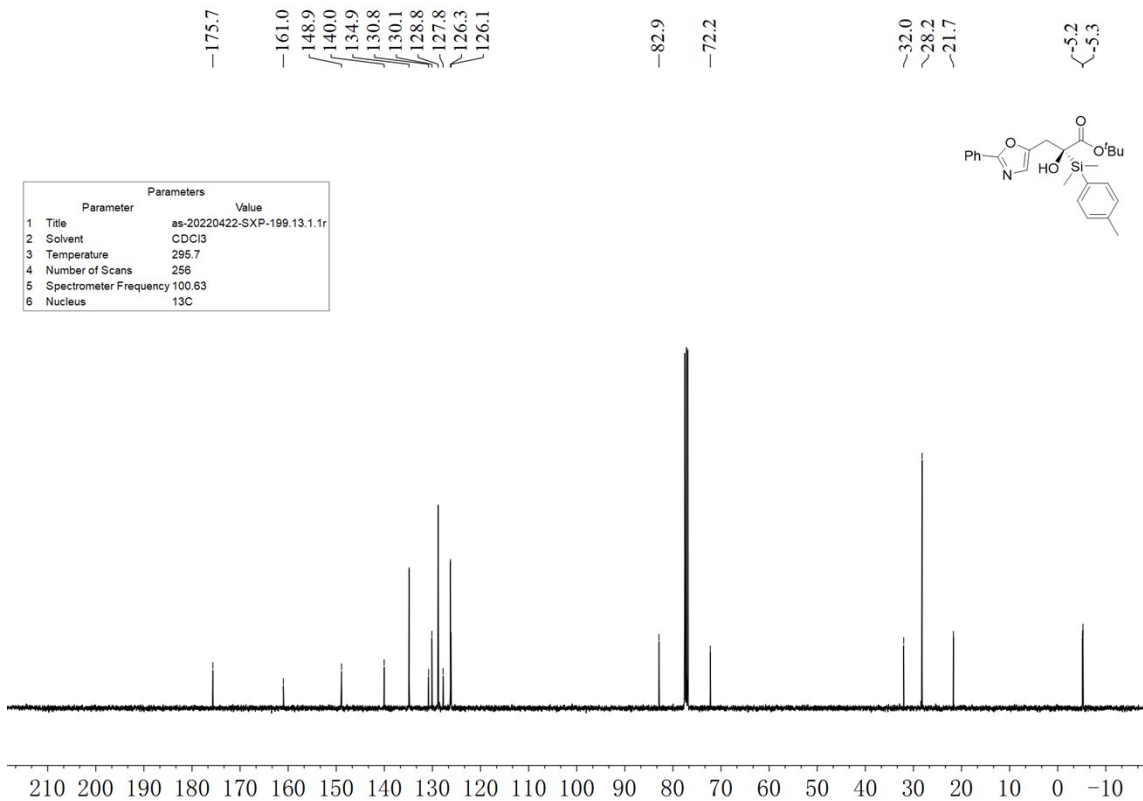

C8

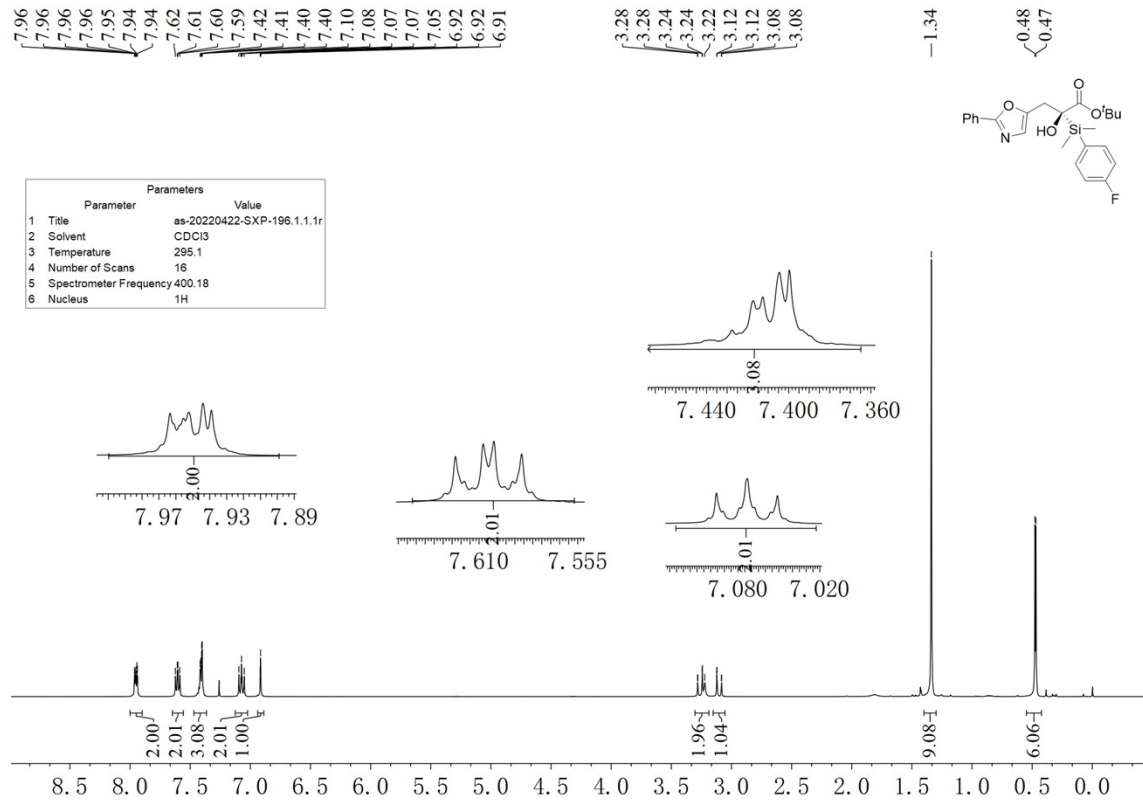

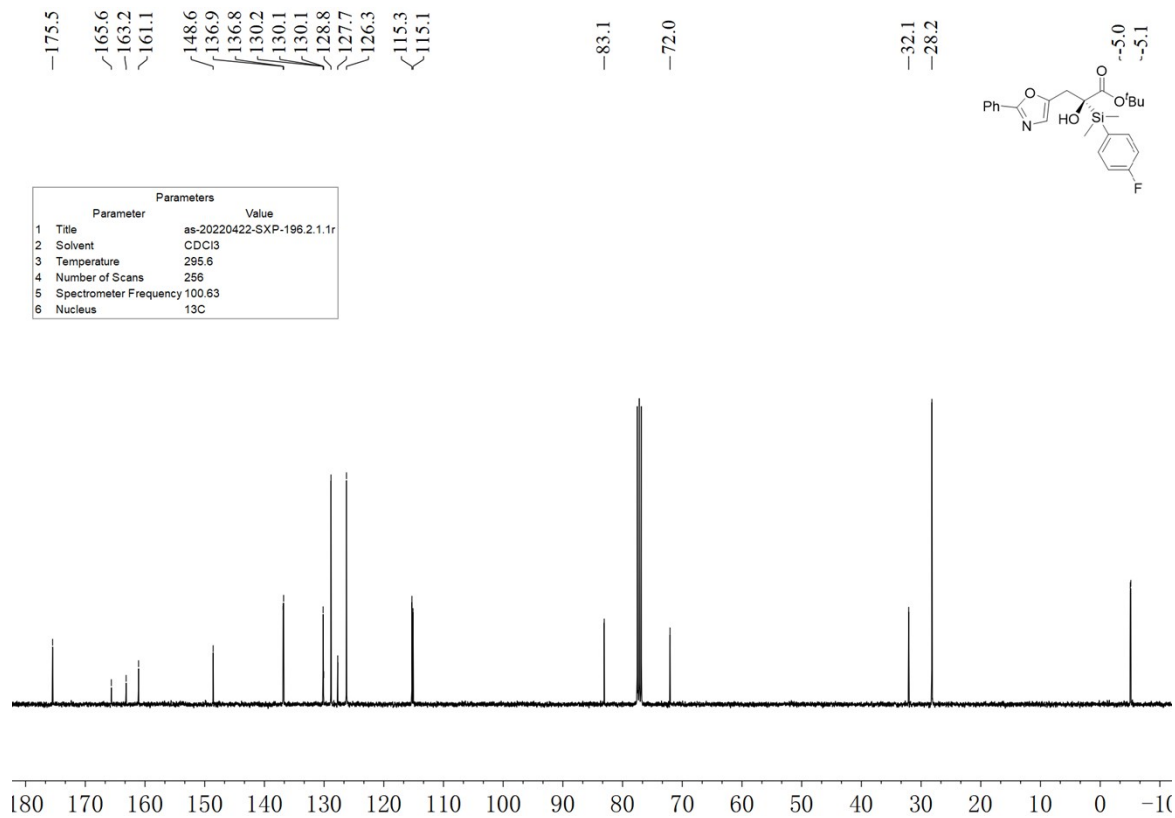

--110.51

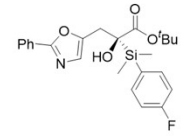

| Parameters               |                            |
|--------------------------|----------------------------|
| Parameter                | Value                      |
| 1 Title                  | as-20220422-SXP-196.3.1.1r |
| 2 Solvent                | CDCl3                      |
| 3 Temperature            | 295.3                      |
| 4 Number of Scans        | 16                         |
| 5 Spectrometer Frequency | 376.55                     |
| 6 Nucleus                | 19F                        |

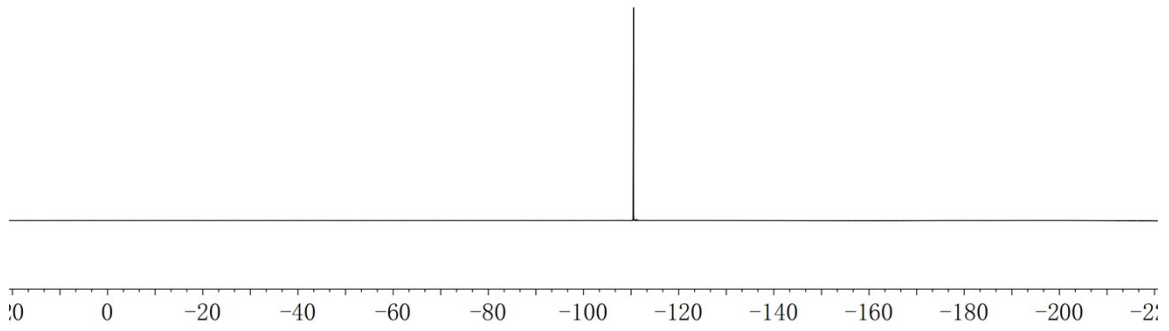



C9

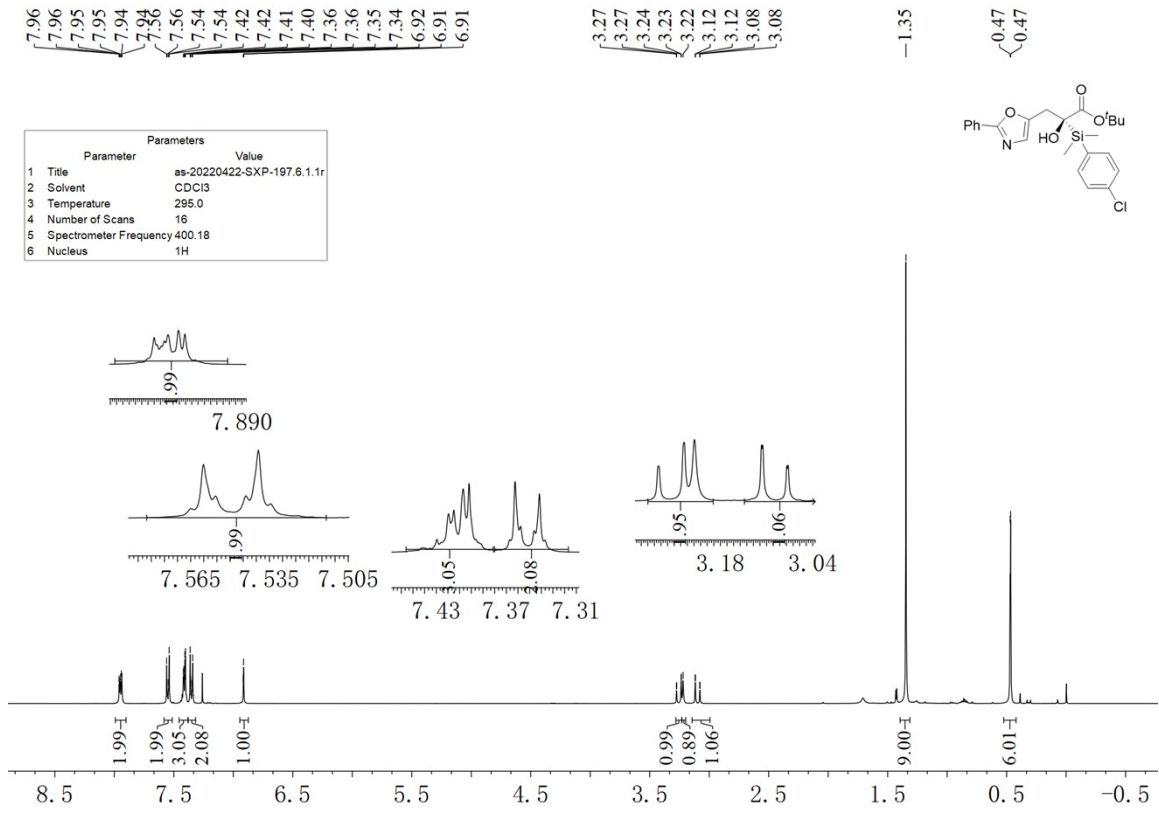

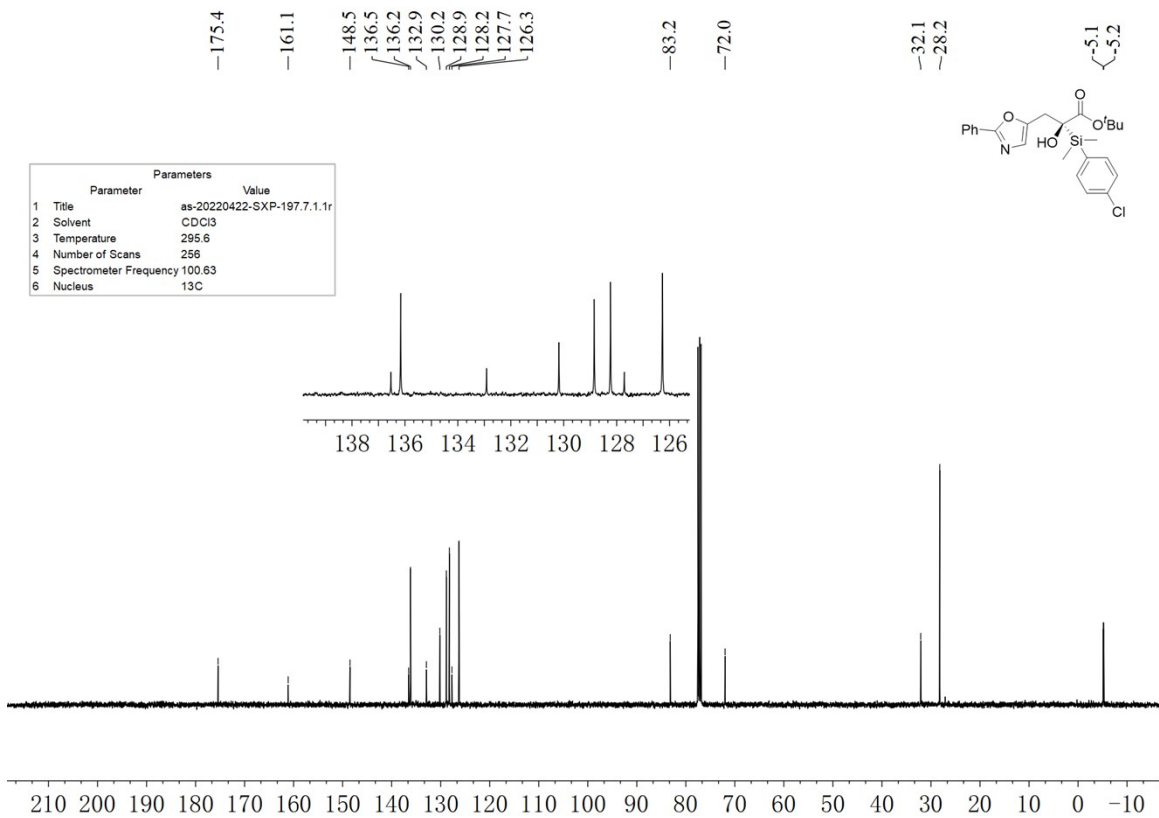

C10

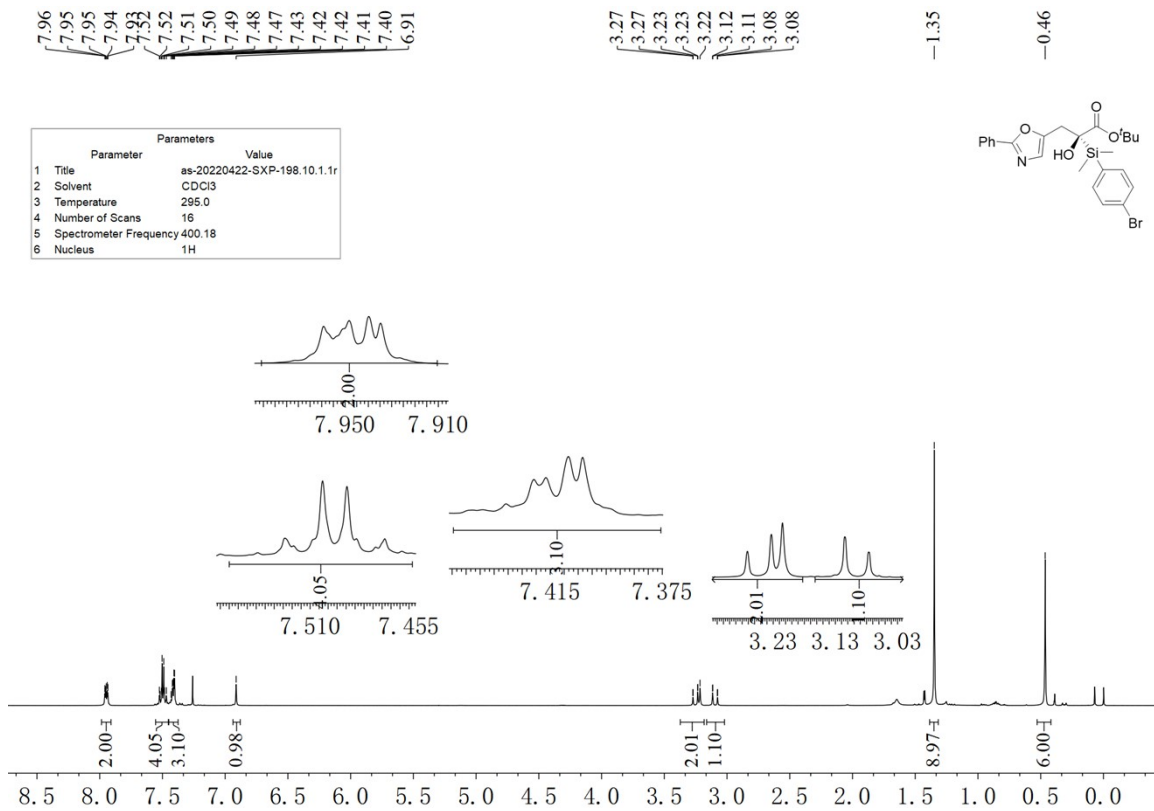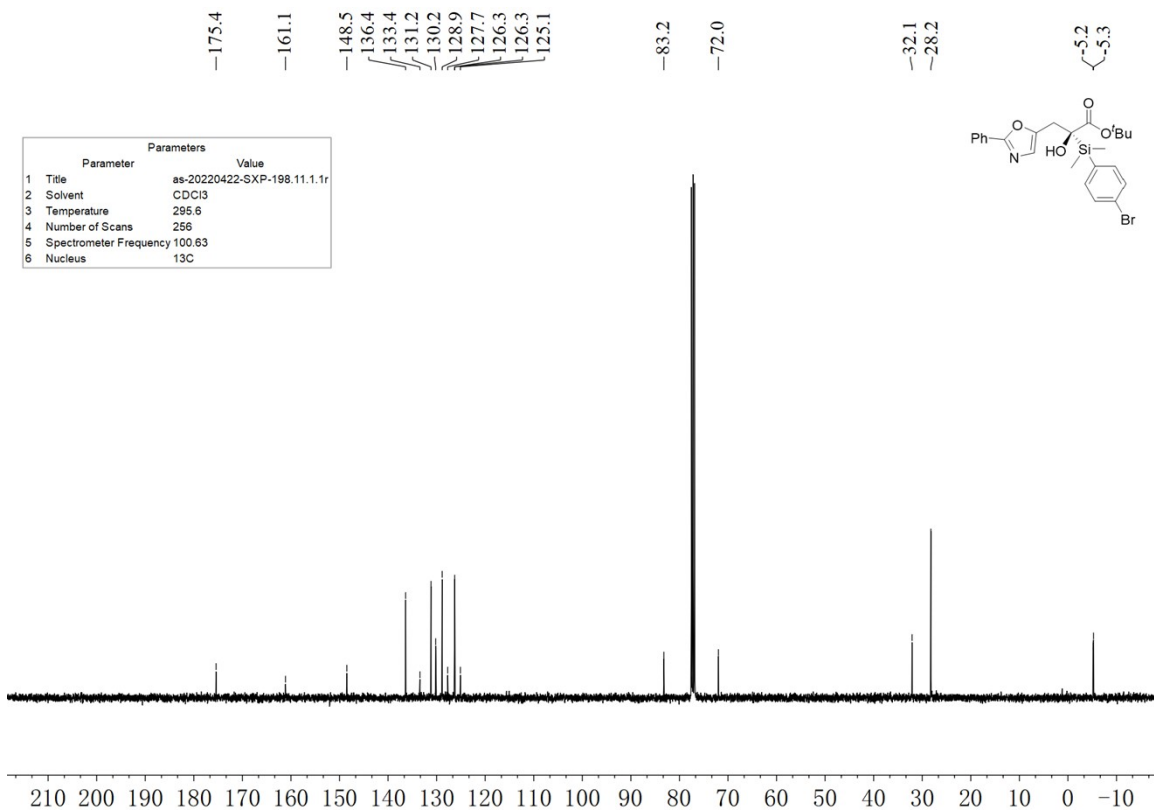

C11

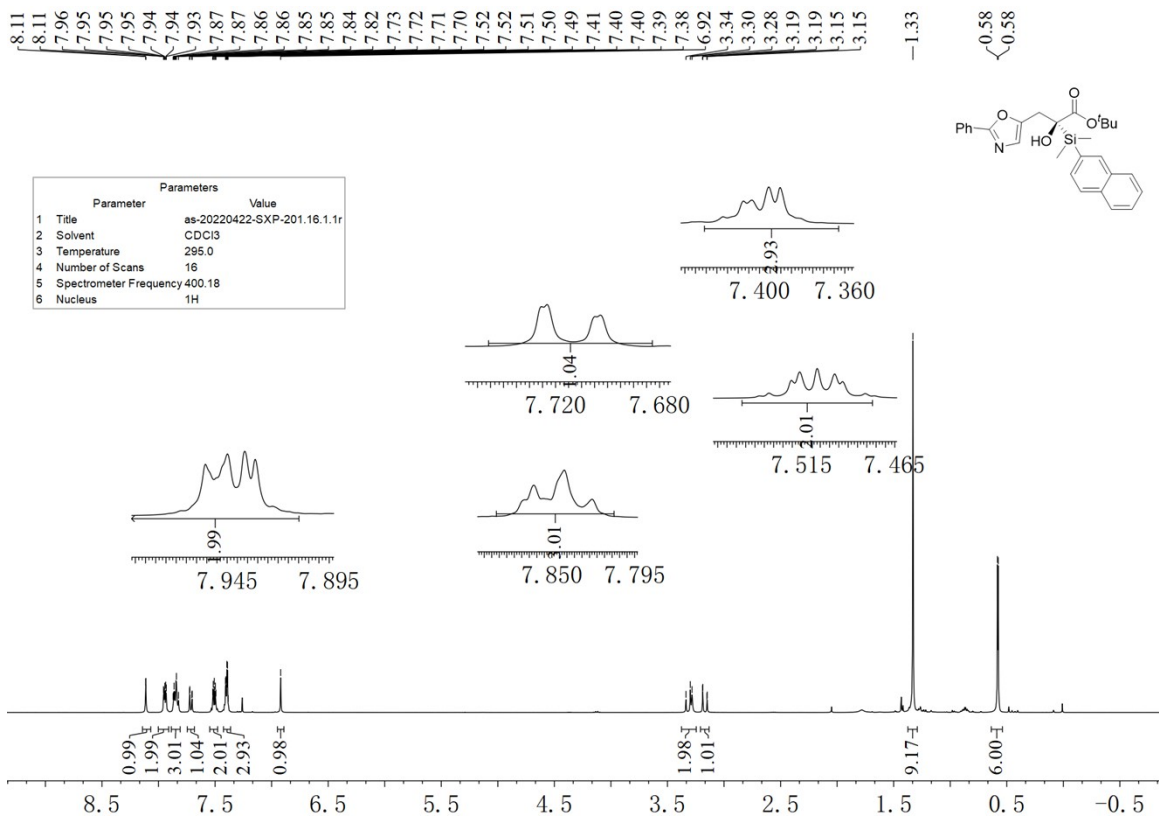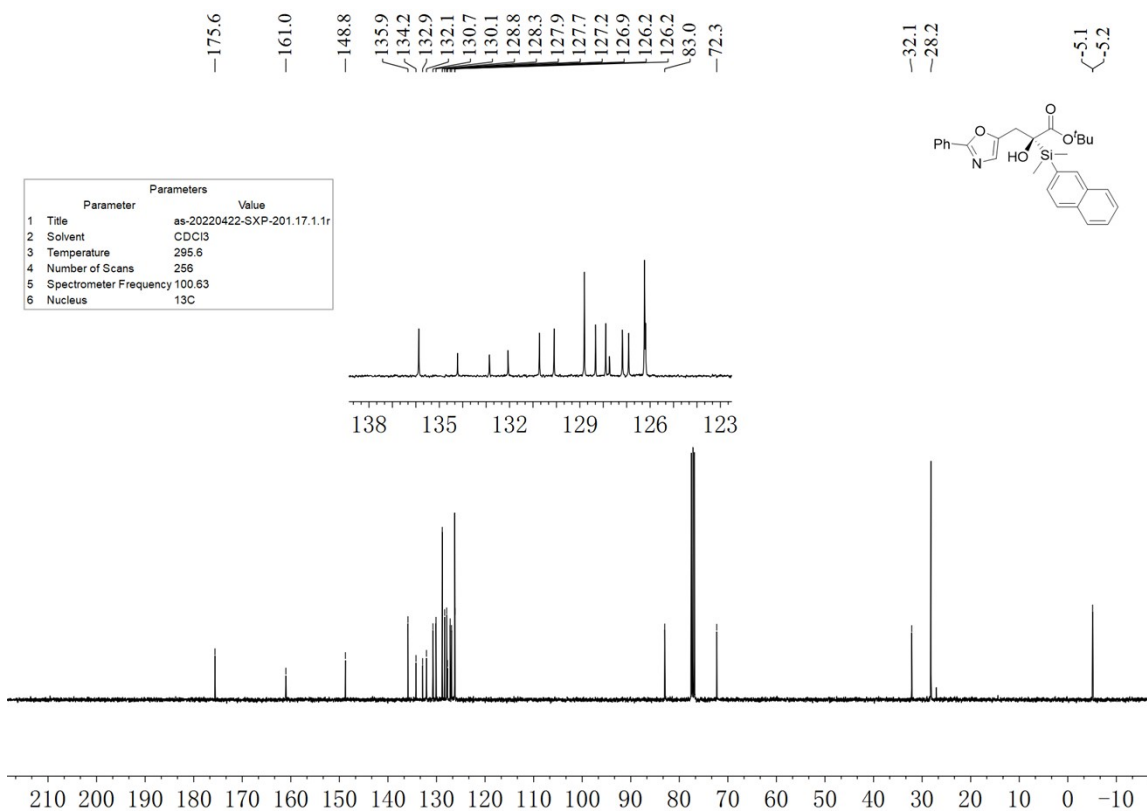

**C12**

7.95  
7.94  
7.94  
7.93  
7.93  
7.76  
7.75  
7.75  
7.74  
7.74  
7.72  
7.72  
7.43  
7.42  
7.42  
7.41  
7.40  
7.40  
7.40  
7.39  
7.39  
7.38  
7.38  
6.91

3.42  
3.39  
3.37  
3.27  
3.24

-1.21  
-0.80

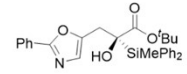

| Parameters               |                            |       |
|--------------------------|----------------------------|-------|
| Parameter                |                            | Value |
| 1 Title                  | sangxp-20220504-212.1.1.1r |       |
| 2 Solvent                | CDCl3                      |       |
| 3 Temperature            | 292.8                      |       |
| 4 Number of Scans        | 16                         |       |
| 5 Spectrometer Frequency | 600.17                     |       |
| 6 Nucleus                | 1H                         |       |

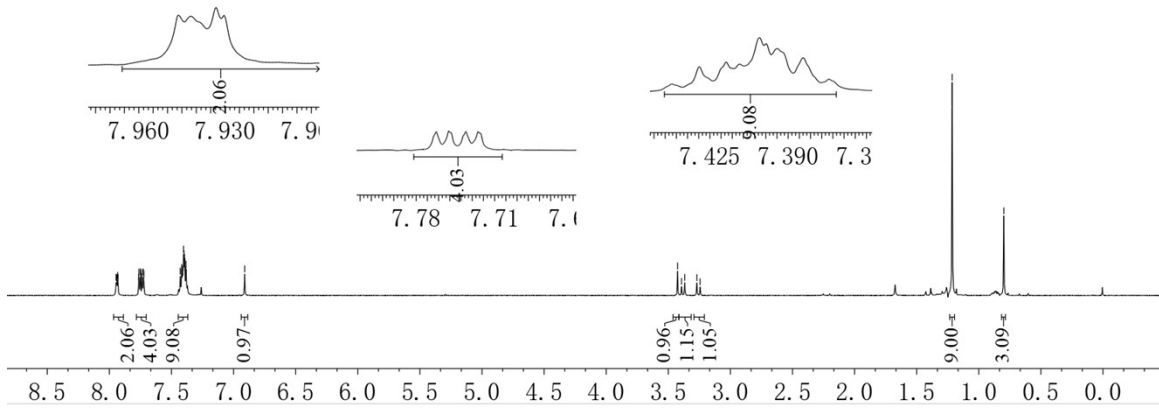

-175.4  
-161.1  
-148.5  
-135.6  
-133.4  
-133.0  
-130.2  
-130.1  
-128.8  
-128.1  
-127.7  
-126.4  
-126.3  
-83.2  
-72.6  
-32.9  
-27.9  
-5.5

| Parameters               |                            |       |
|--------------------------|----------------------------|-------|
| Parameter                |                            | Value |
| 1 Title                  | sangxp-20220504-212.2.1.1r |       |
| 2 Solvent                | CDCl3                      |       |
| 3 Temperature            | 293.7                      |       |
| 4 Number of Scans        | 256                        |       |
| 5 Spectrometer Frequency | 150.91                     |       |
| 6 Nucleus                | 13C                        |       |

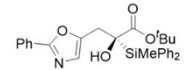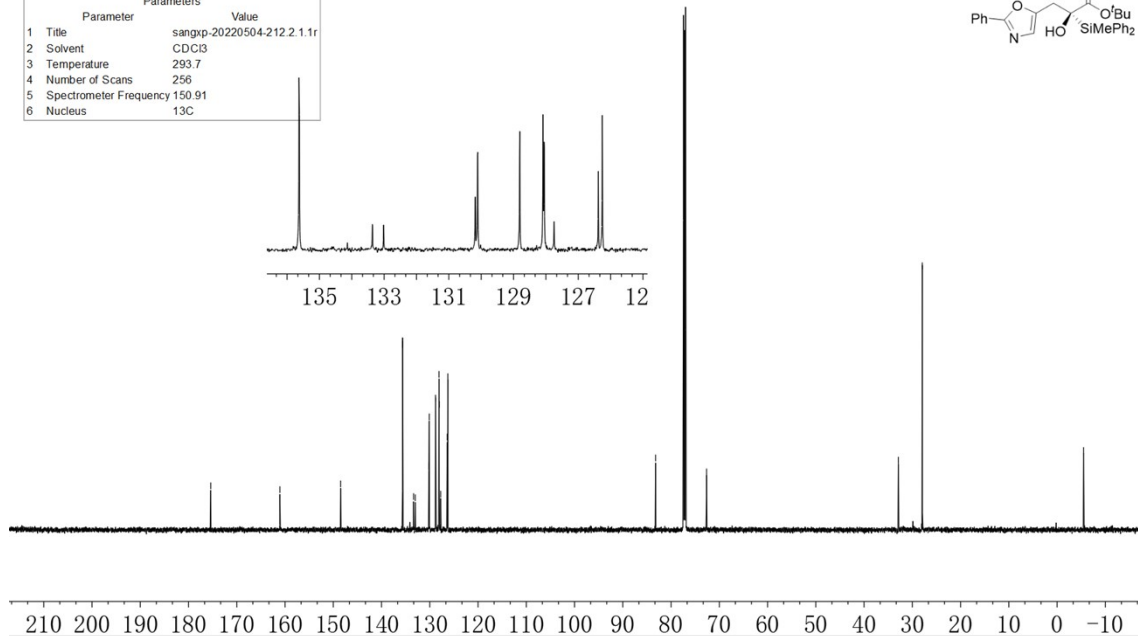

C13

7.88  
7.87  
7.86  
7.86  
7.63  
7.63  
7.61  
7.48  
7.47  
7.46  
7.46  
7.45  
7.40  
7.39  
7.39  
7.38  
7.37  
7.36  
7.36  
7.35  
7.33  
7.33  
7.32  
7.32  
7.31  
7.31  
7.30  
7.29  
7.28  
7.00  
3.31  
3.28  
3.24  
3.16  
3.12  
3.12  
-1.30  
0.49  
0.47

| Parameters               |                             |       |
|--------------------------|-----------------------------|-------|
| Parameter                |                             | Value |
| 1 Title                  | sangxp-20220302-135.13.1.1r |       |
| 2 Solvent                | CDCl3                       |       |
| 3 Temperature            | 293.3                       |       |
| 4 Number of Scans        | 18                          |       |
| 5 Spectrometer Frequency | 400.18                      |       |
| 6 Nucleus                | 1H                          |       |

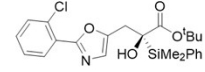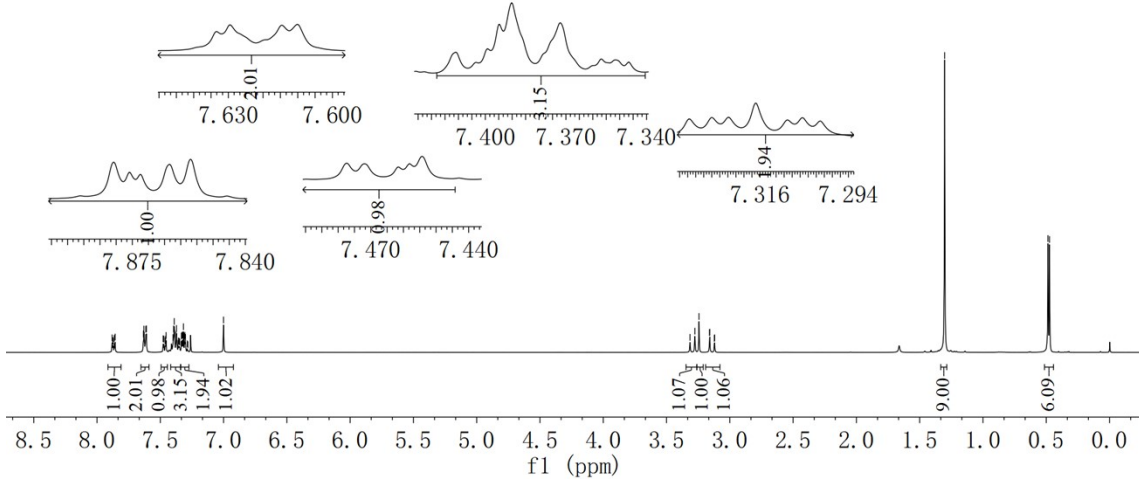

-175.4  
-158.6  
-149.1  
-134.7  
-134.4  
-132.2  
-131.1  
-130.7  
-130.7  
-129.9  
-127.8  
-126.7  
-126.5  
-126.0  
-82.9  
-72.0  
-31.9  
-27.9  
-5.4  
-5.4

| Parameters               |                             |       |
|--------------------------|-----------------------------|-------|
| Parameter                |                             | Value |
| 1 Title                  | sangxp-20220302-135.14.1.1r |       |
| 2 Solvent                | CDCl3                       |       |
| 3 Temperature            | 294.0                       |       |
| 4 Number of Scans        | 256                         |       |
| 5 Spectrometer Frequency | 100.63                      |       |
| 6 Nucleus                | 13C                         |       |

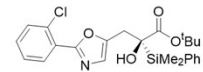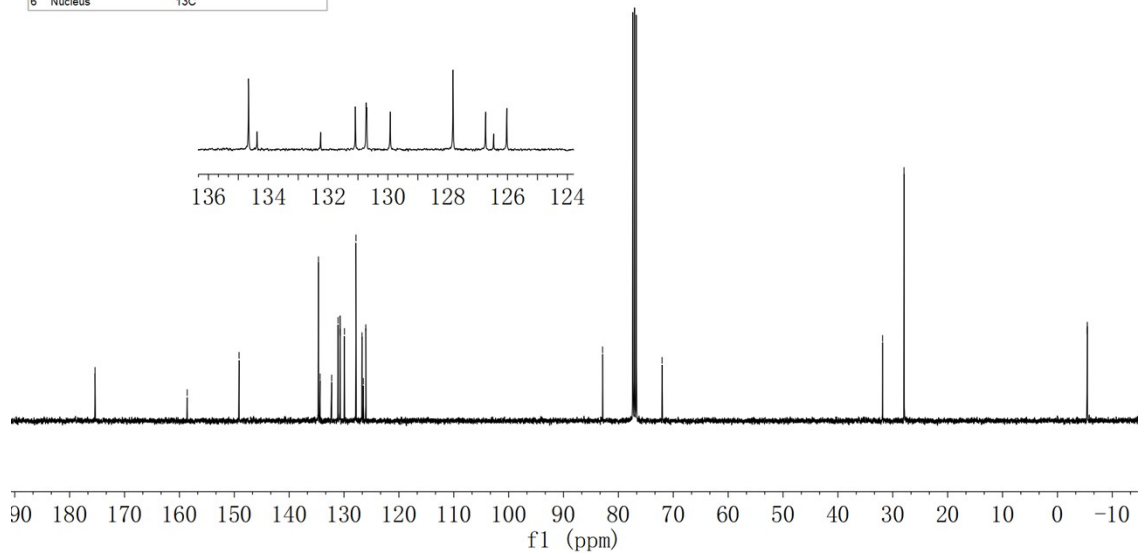

C14

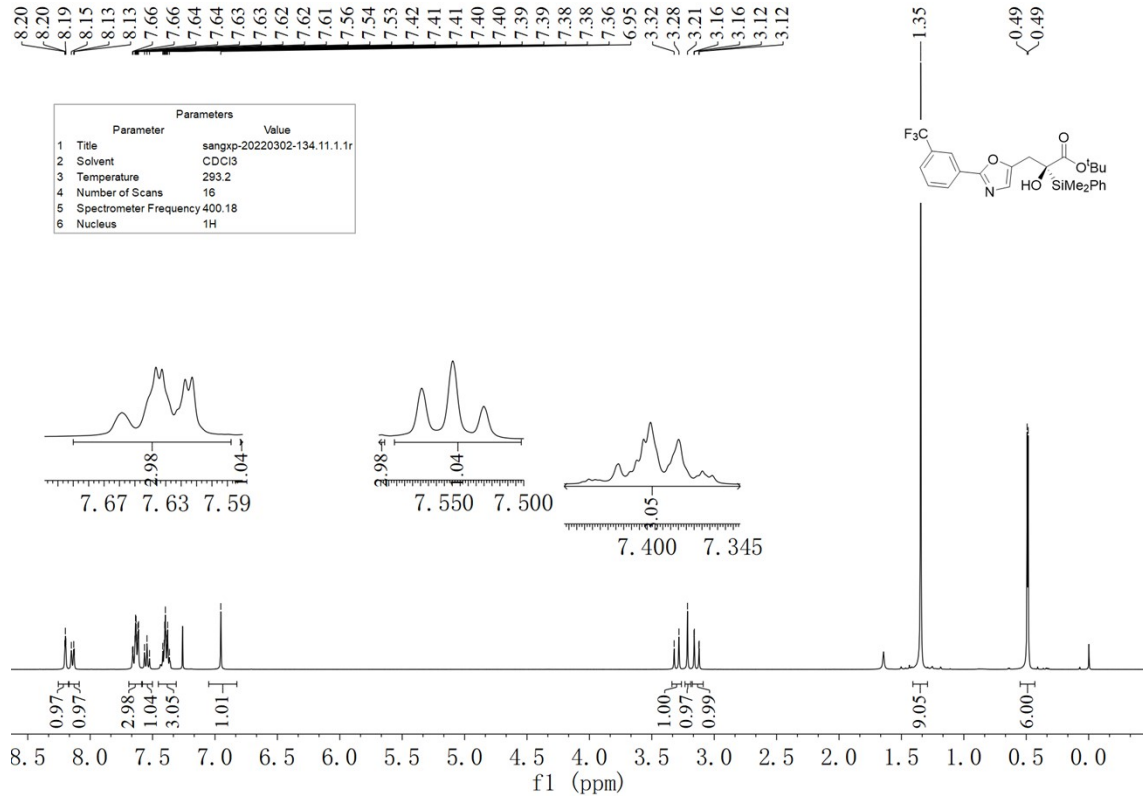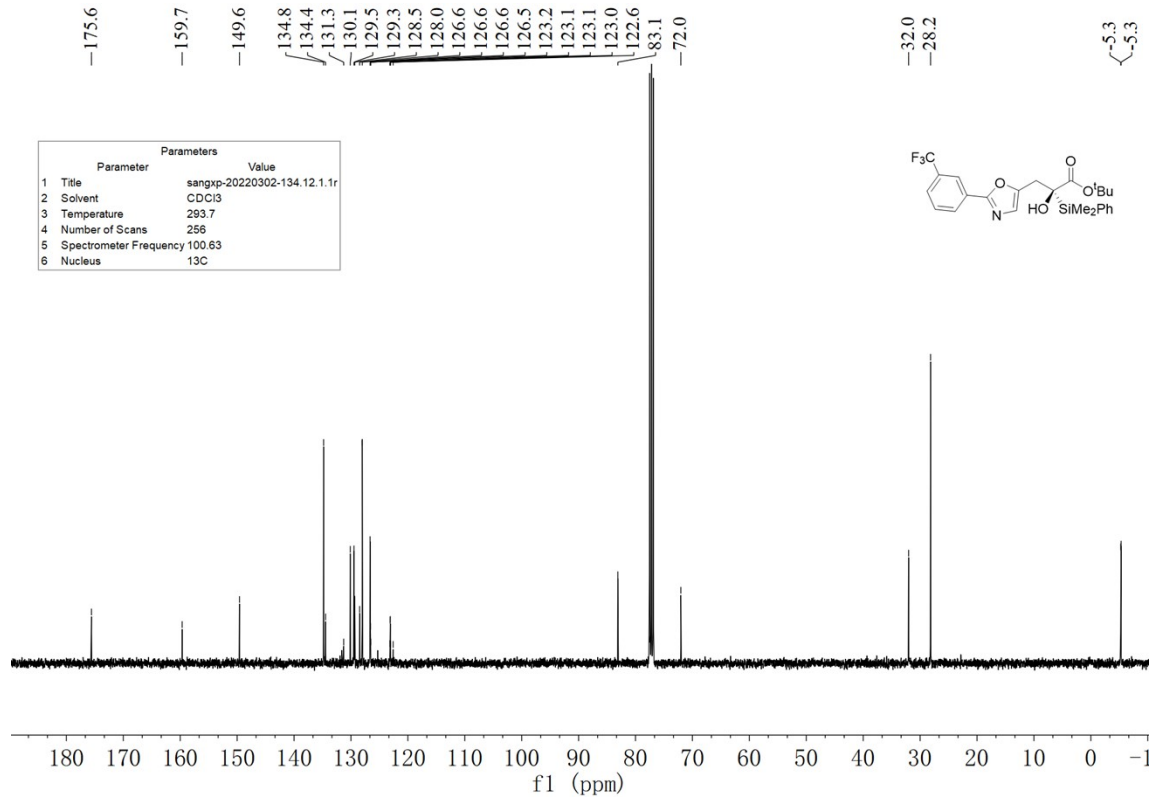

---62.89

|   | Parameter              | Value                      |
|---|------------------------|----------------------------|
| 1 | Title                  | as-20220331-SXP-170.3.1.1r |
| 2 | Solvent                | CDCl <sub>3</sub>          |
| 3 | Temperature            | 293.5                      |
| 4 | Number of Scans        | 16                         |
| 5 | Spectrometer Frequency | 564.72                     |
| 6 | Nucleus                | <sup>19</sup> F            |

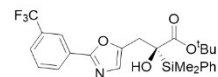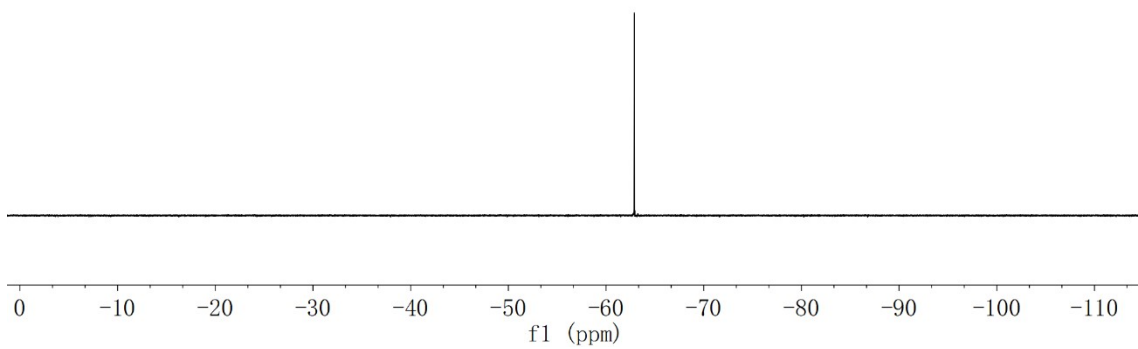



C15

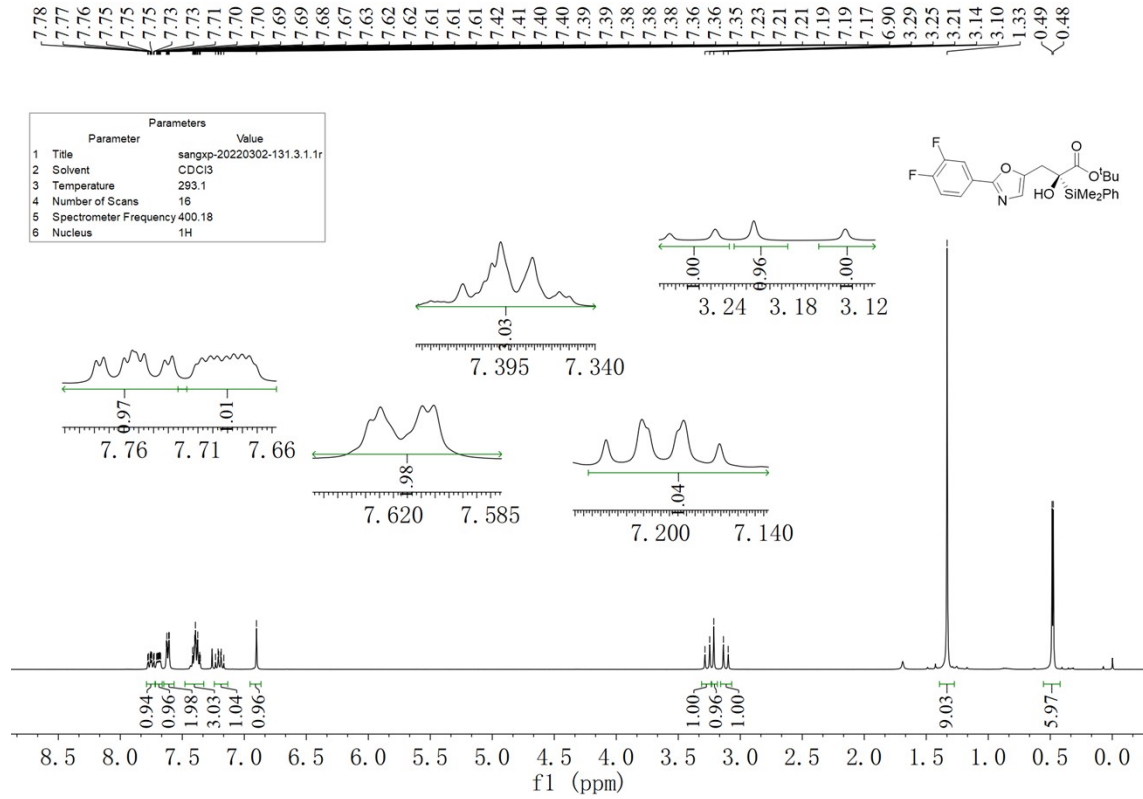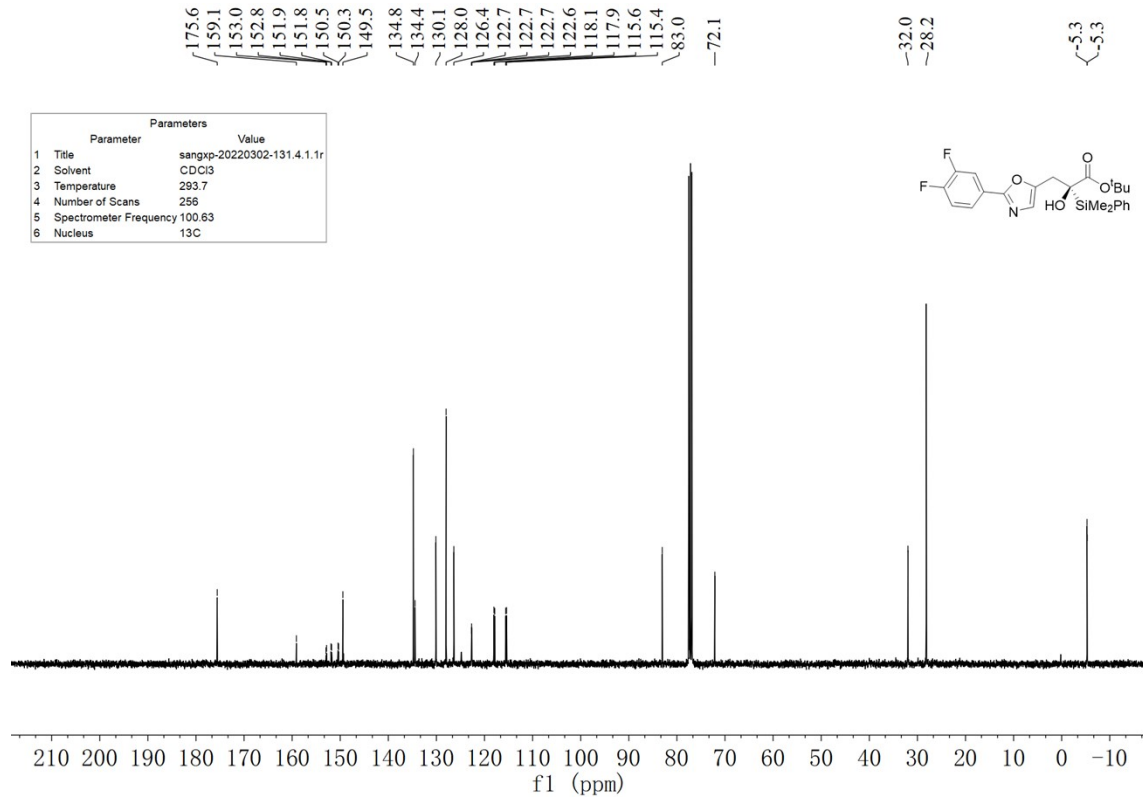

-134.86  
-134.89  
-136.66  
-136.70

| Parameters               |                            |       |
|--------------------------|----------------------------|-------|
| Parameter                |                            | Value |
| 1 Title                  | as-20220331-SXP-171.9.1.1r |       |
| 2 Solvent                | CDCl3                      |       |
| 3 Temperature            | 293.4                      |       |
| 4 Number of Scans        | 16                         |       |
| 5 Spectrometer Frequency | 564.72                     |       |
| 6 Nucleus                | <sup>19</sup> F            |       |

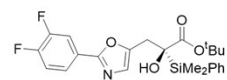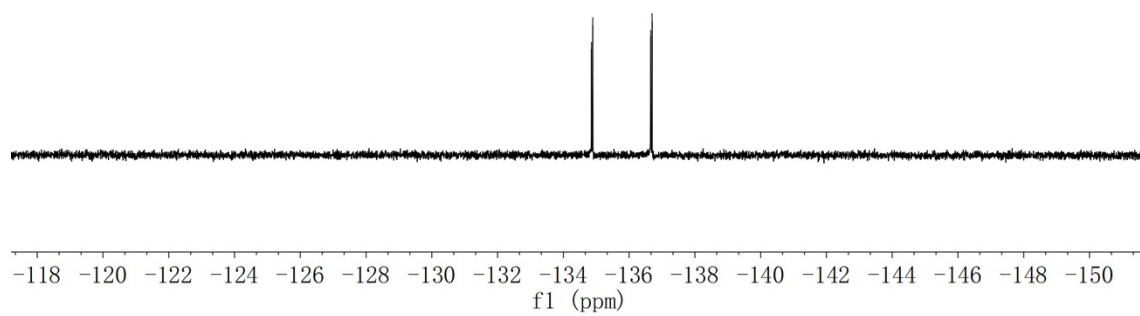

C16

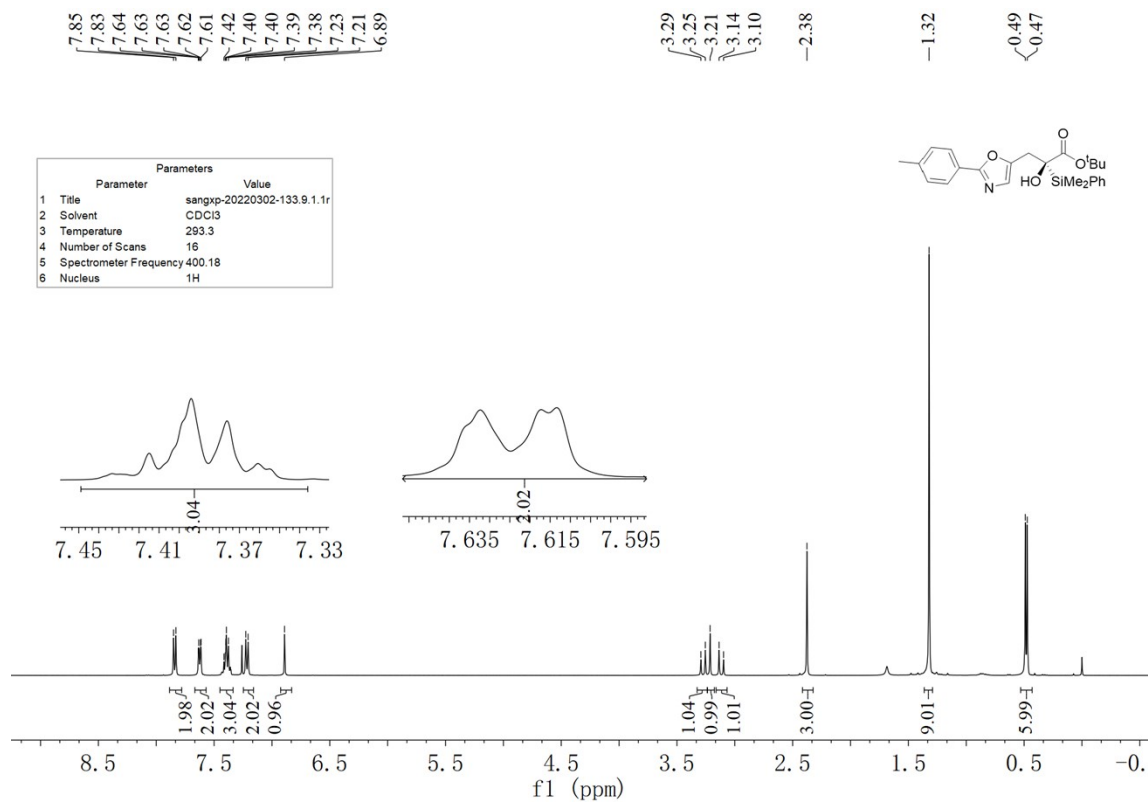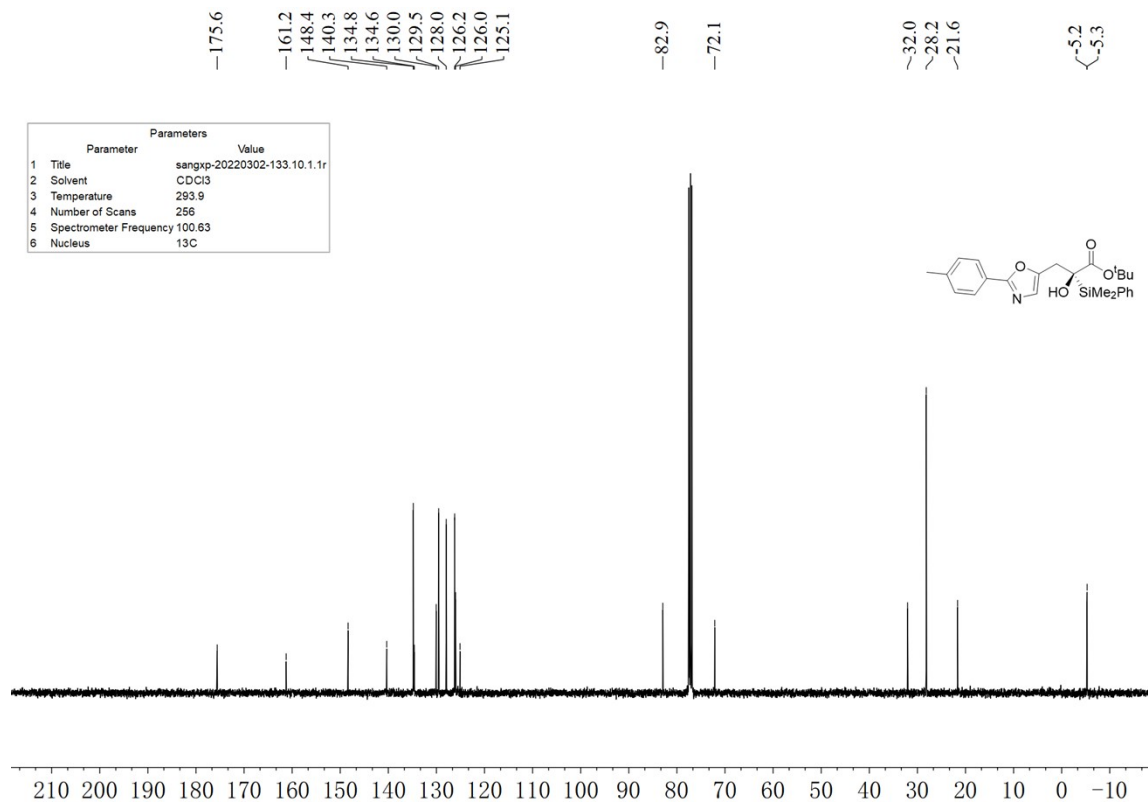

C17

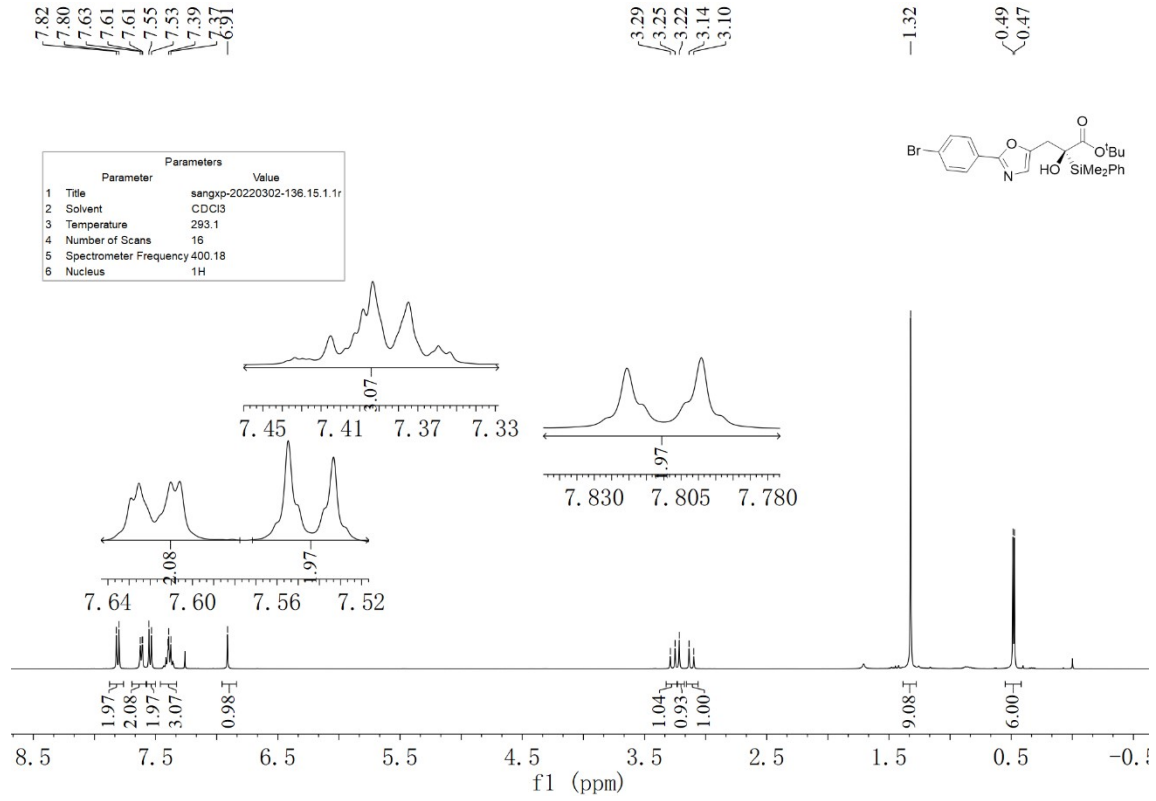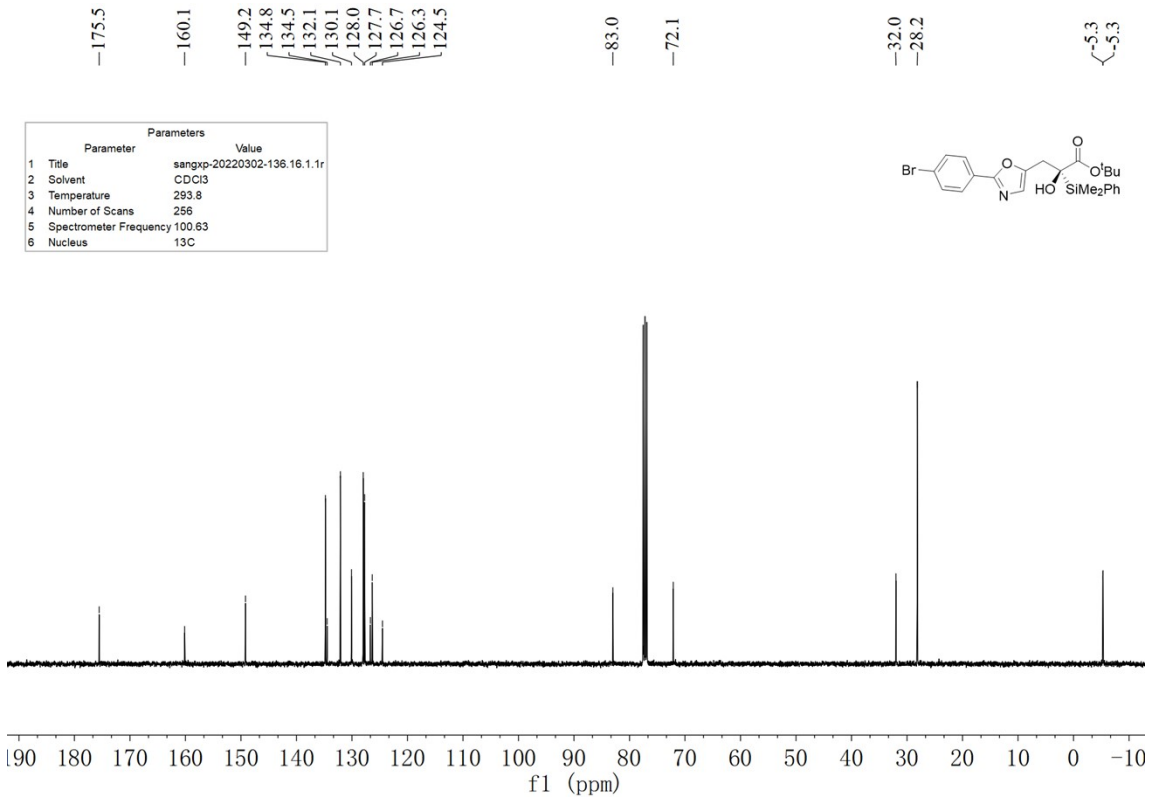

C18

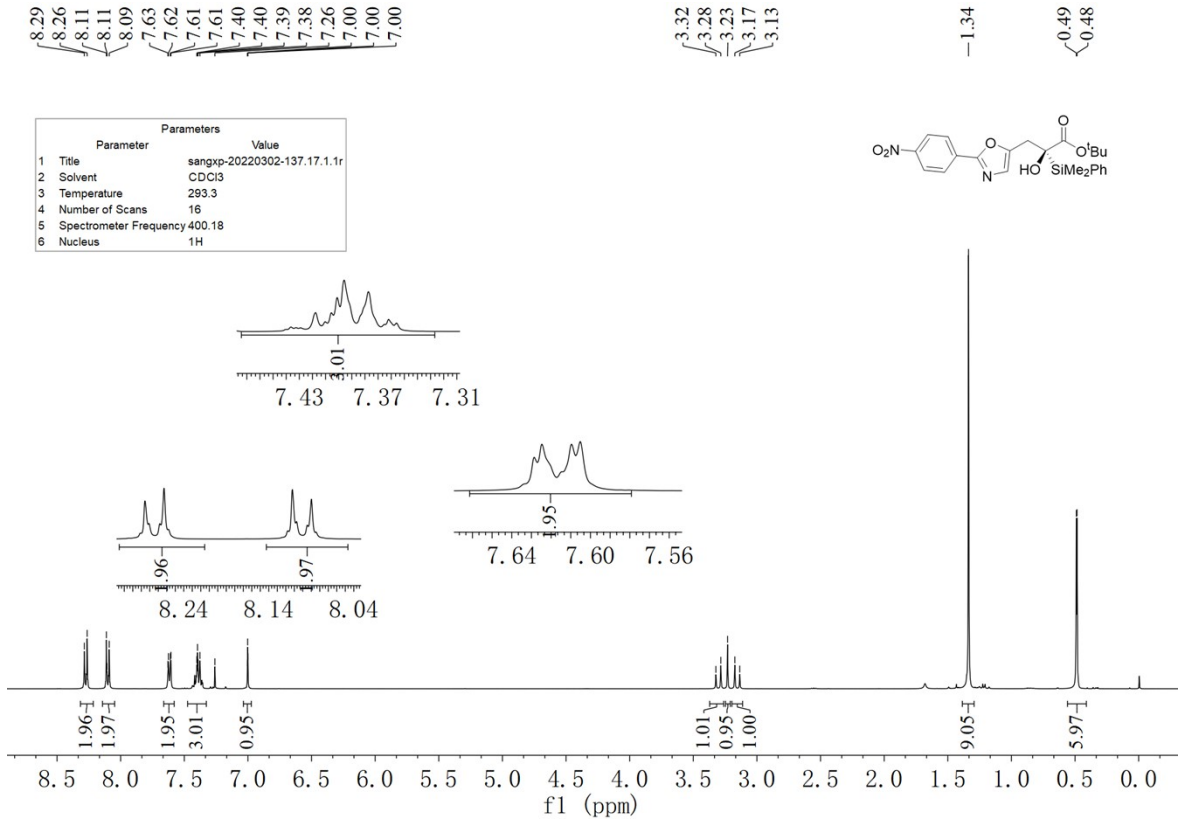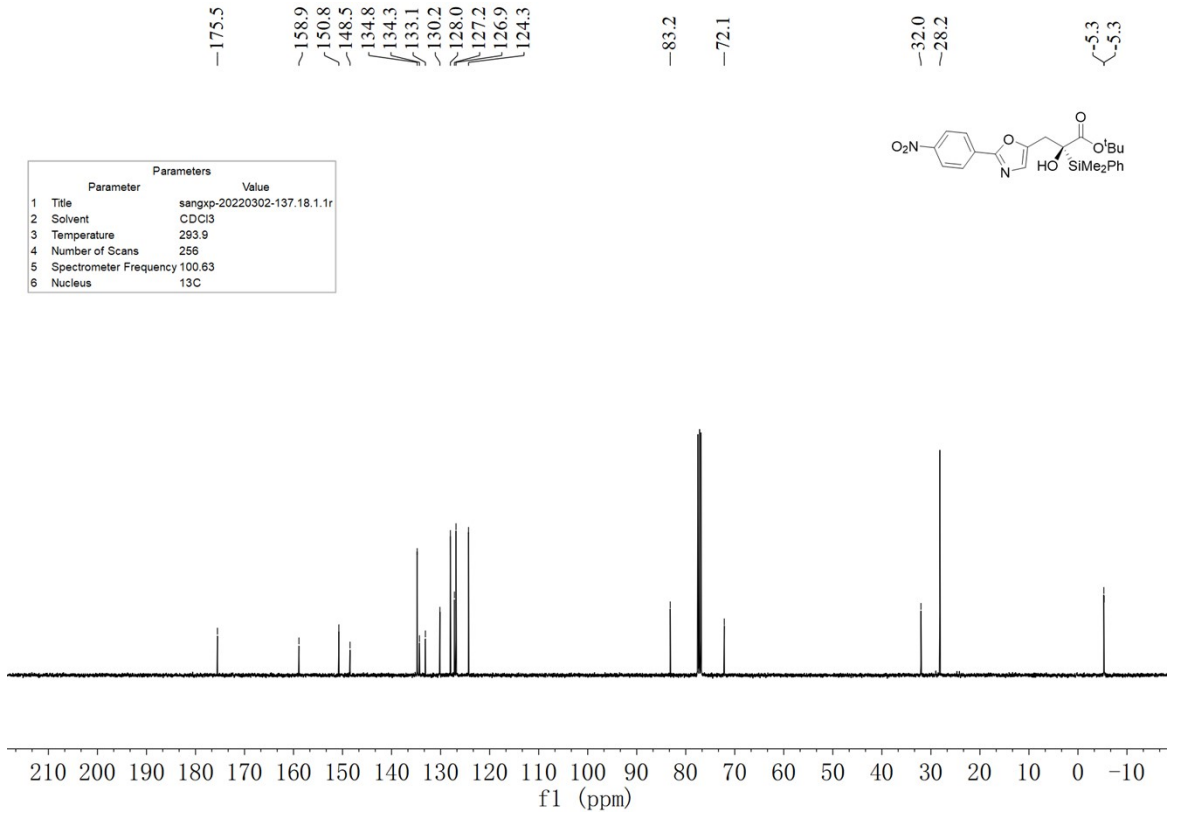

C19

8.05  
8.05  
8.04  
8.03  
7.71  
7.70  
7.69  
7.63  
7.62  
7.61  
7.60  
7.42  
7.40  
7.40  
7.39  
7.39  
7.38  
7.38  
7.26  
6.98  
6.97

3.31  
3.27  
3.21  
3.16  
3.16  
3.12

-1.33

0.49  
0.48

| Parameters               |                            |       |
|--------------------------|----------------------------|-------|
| Parameter                |                            | Value |
| 1 Title                  | sangxp-20220510-223.5.1.1r |       |
| 2 Solvent                | CDCl3                      |       |
| 3 Temperature            | 295.4                      |       |
| 4 Number of Scans        | 16                         |       |
| 5 Spectrometer Frequency | 400.18                     |       |
| 6 Nucleus                | 1H                         |       |

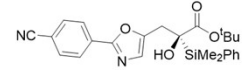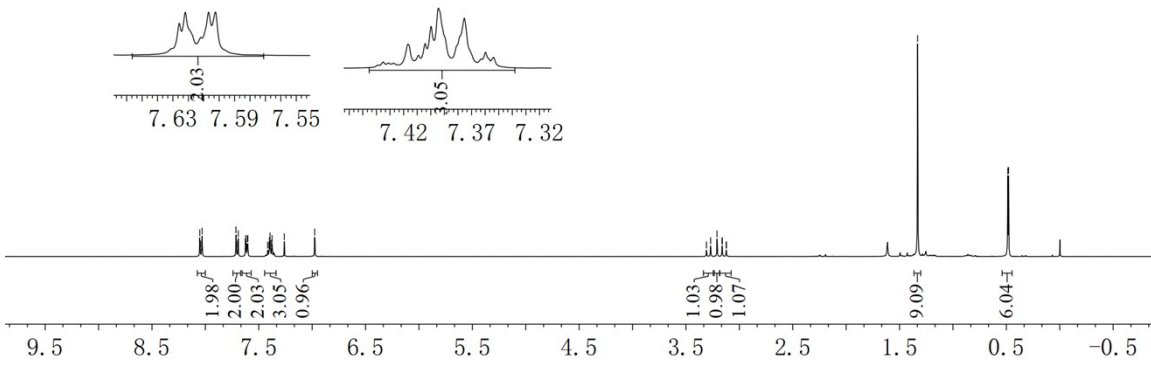

175.5  
159.2  
150.4  
134.8  
134.4  
132.7  
131.5  
130.1  
128.0  
127.0  
126.6  
118.6  
113.4

83.1  
72.2

32.0  
28.2

5.3  
5.3

| Parameters               |                            |       |
|--------------------------|----------------------------|-------|
| Parameter                |                            | Value |
| 1 Title                  | sangxp-20220510-223.6.1.1r |       |
| 2 Solvent                | CDCl3                      |       |
| 3 Temperature            | 296.0                      |       |
| 4 Number of Scans        | 256                        |       |
| 5 Spectrometer Frequency | 100.63                     |       |
| 6 Nucleus                | 13C                        |       |

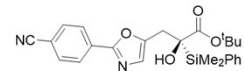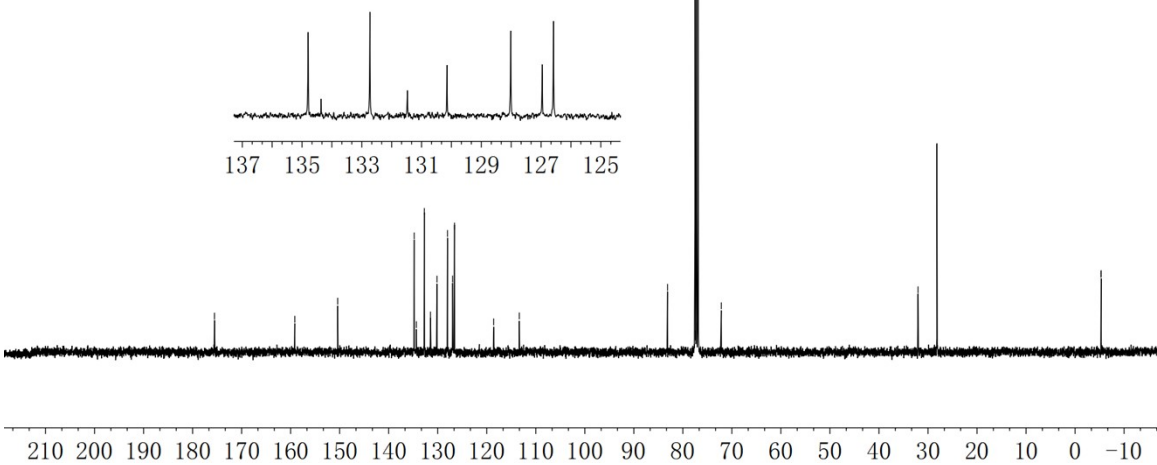

C20

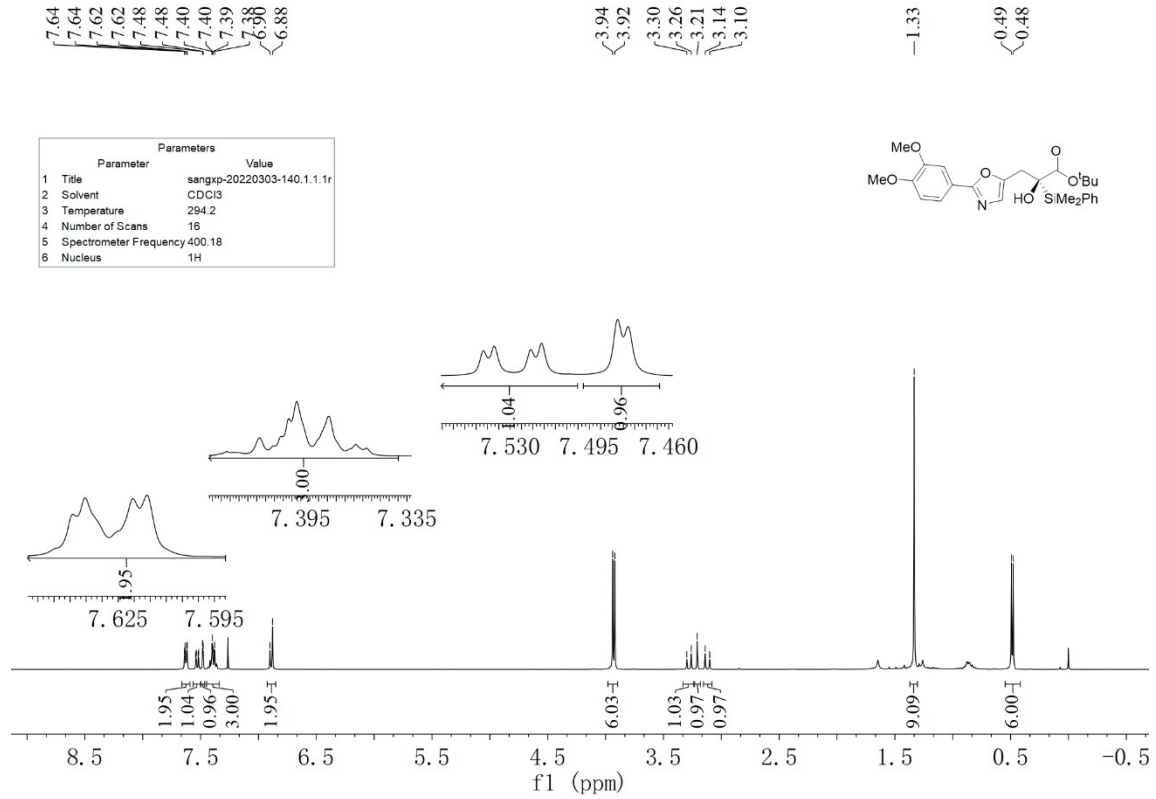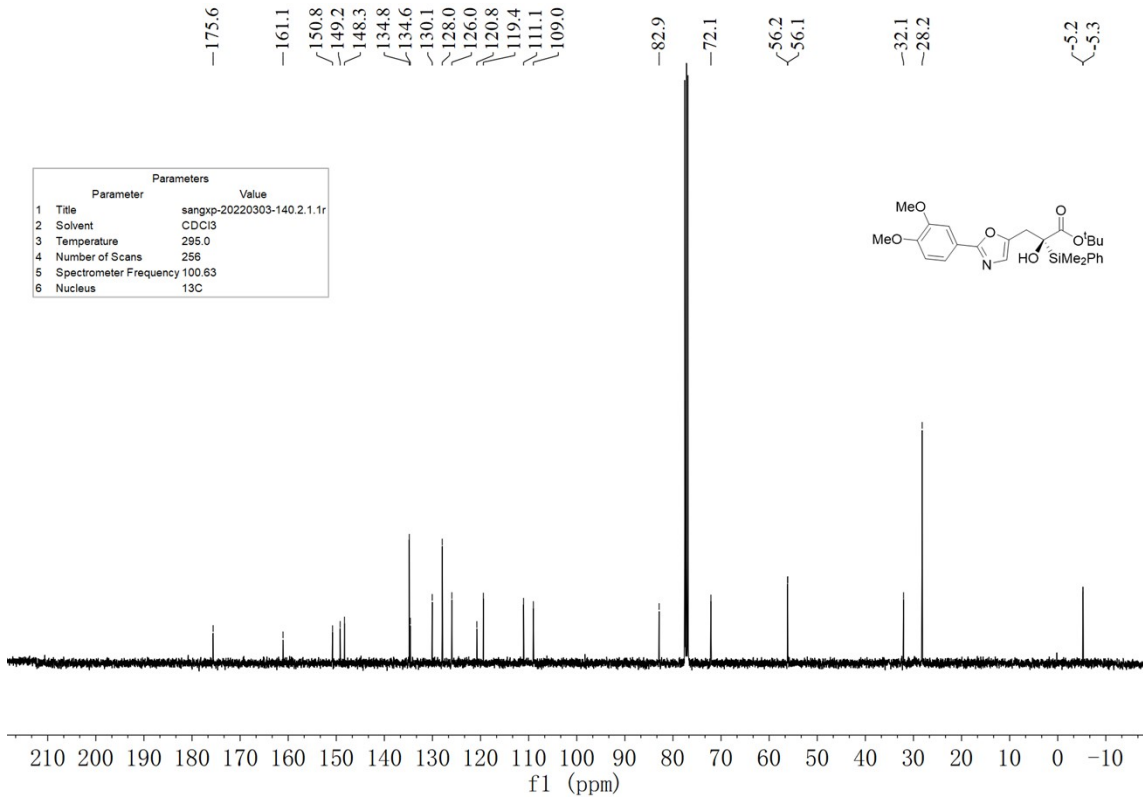

C21

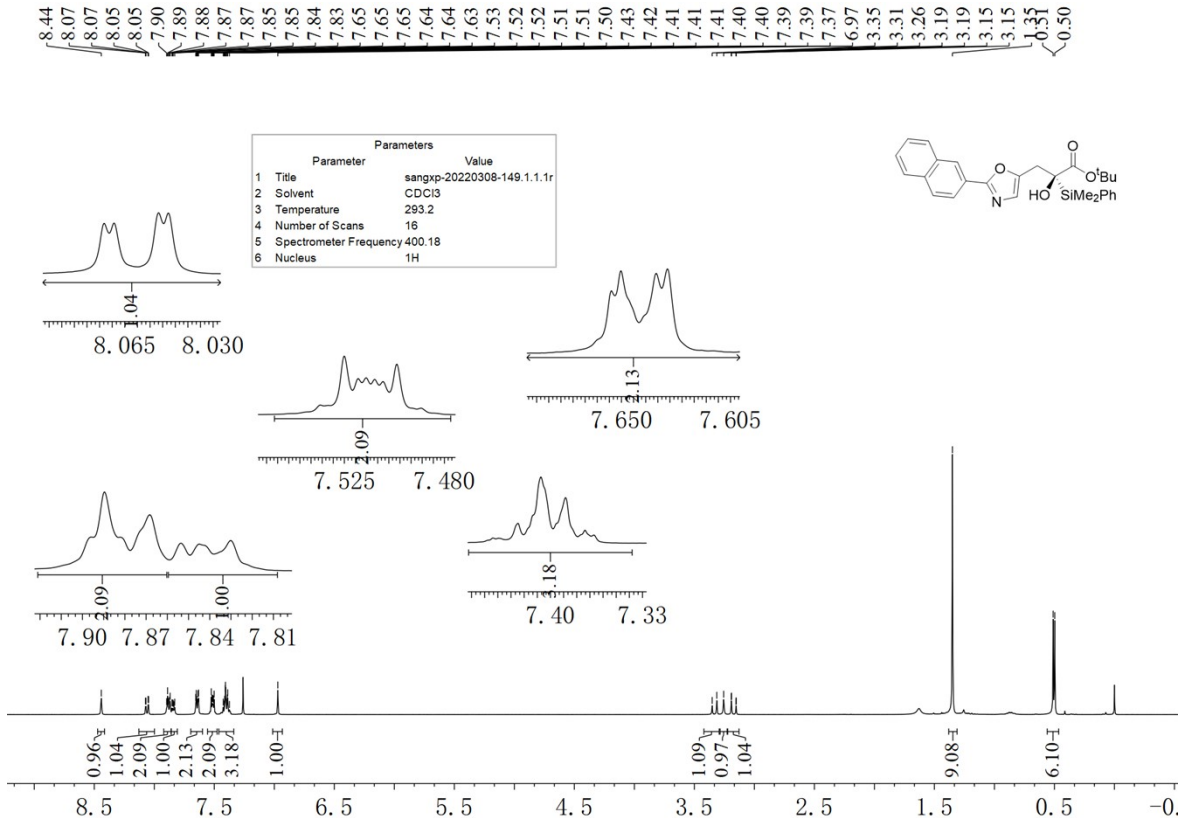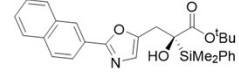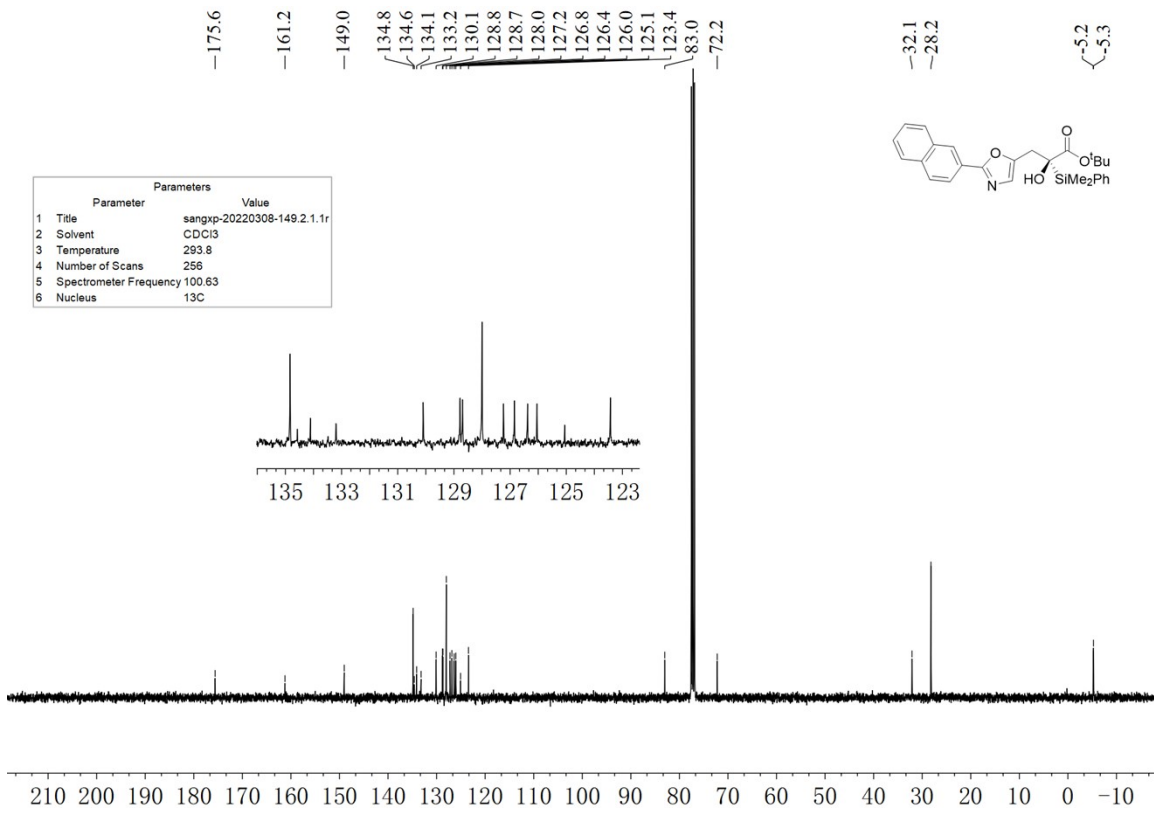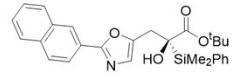



C22

7.644  
7.640  
7.627  
7.622  
7.401  
7.383  
-6.769

4.826  
4.810  
4.340  
4.336  
4.331  
4.125

3.236  
3.200  
3.097  
3.059

-1.373  
-0.498  
-0.478

| Parameters               |          |
|--------------------------|----------|
| Parameter                | Value    |
| 1 Title                  | pdata/ 1 |
| 2 Solvent                | CDCl3    |
| 3 Temperature            | 295.0    |
| 4 Number of Scans        | 16       |
| 5 Spectrometer Frequency | 400.18   |
| 6 Nucleus                | 1H       |

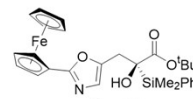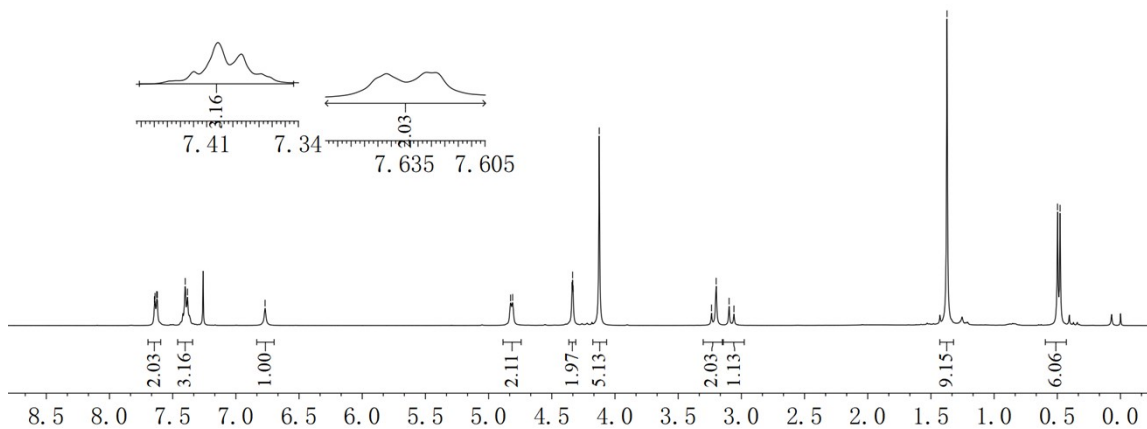

-175.7  
-163.0  
-147.5  
134.8  
134.7  
130.0  
128.0  
125.9

-82.8  
72.0  
71.4  
70.0  
70.0  
69.7  
67.4  
67.4

-32.1  
-28.3

-5.2  
-5.2

| Parameters               |          |
|--------------------------|----------|
| Parameter                | Value    |
| 1 Title                  | pdata/ 1 |
| 2 Solvent                | CDCl3    |
| 3 Temperature            | 295.4    |
| 4 Number of Scans        | 256      |
| 5 Spectrometer Frequency | 100.63   |
| 6 Nucleus                | 13C      |

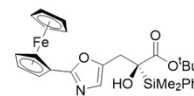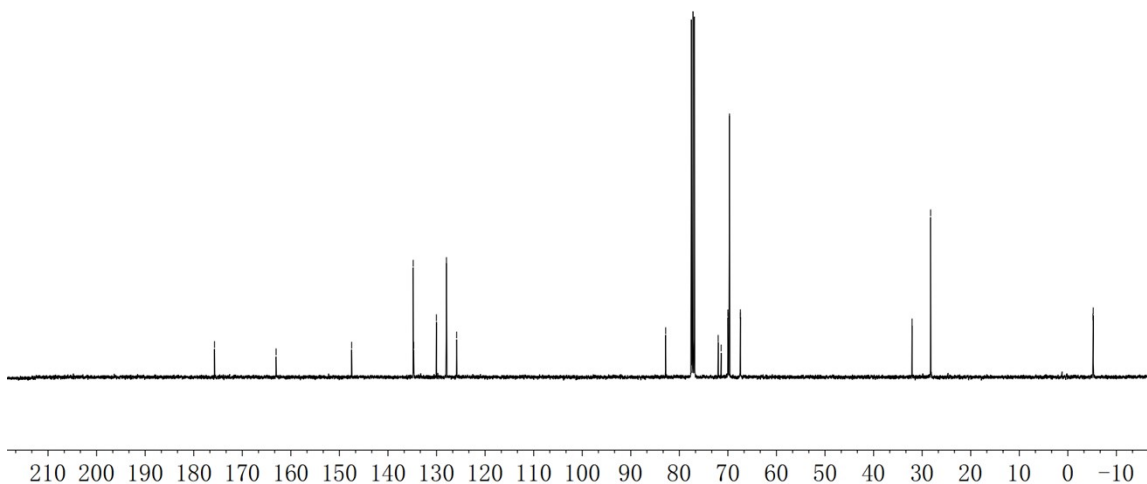

C23

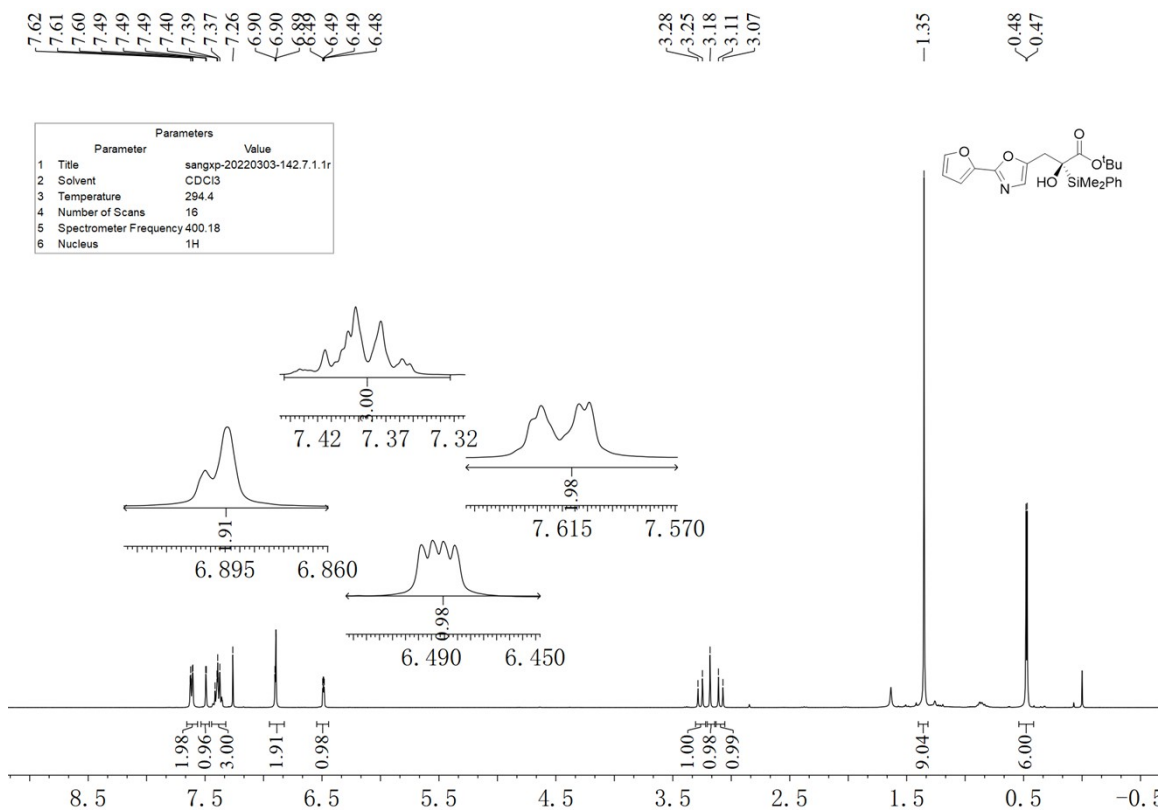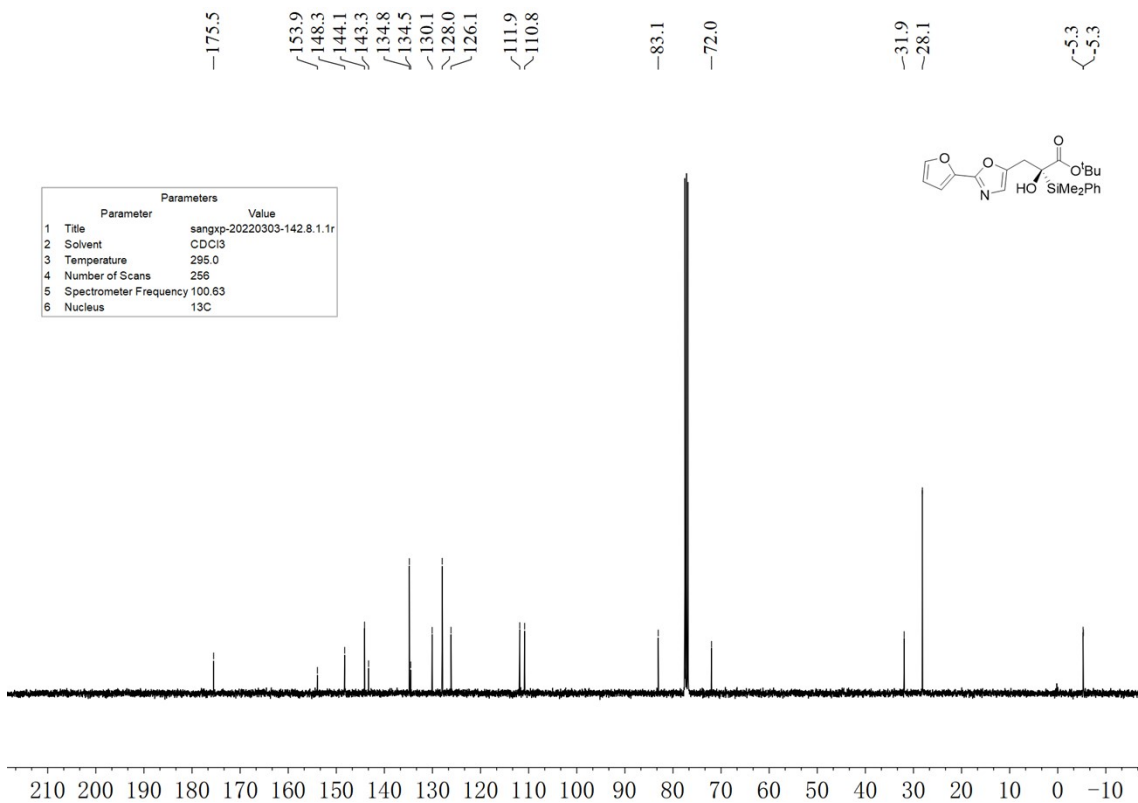

C24

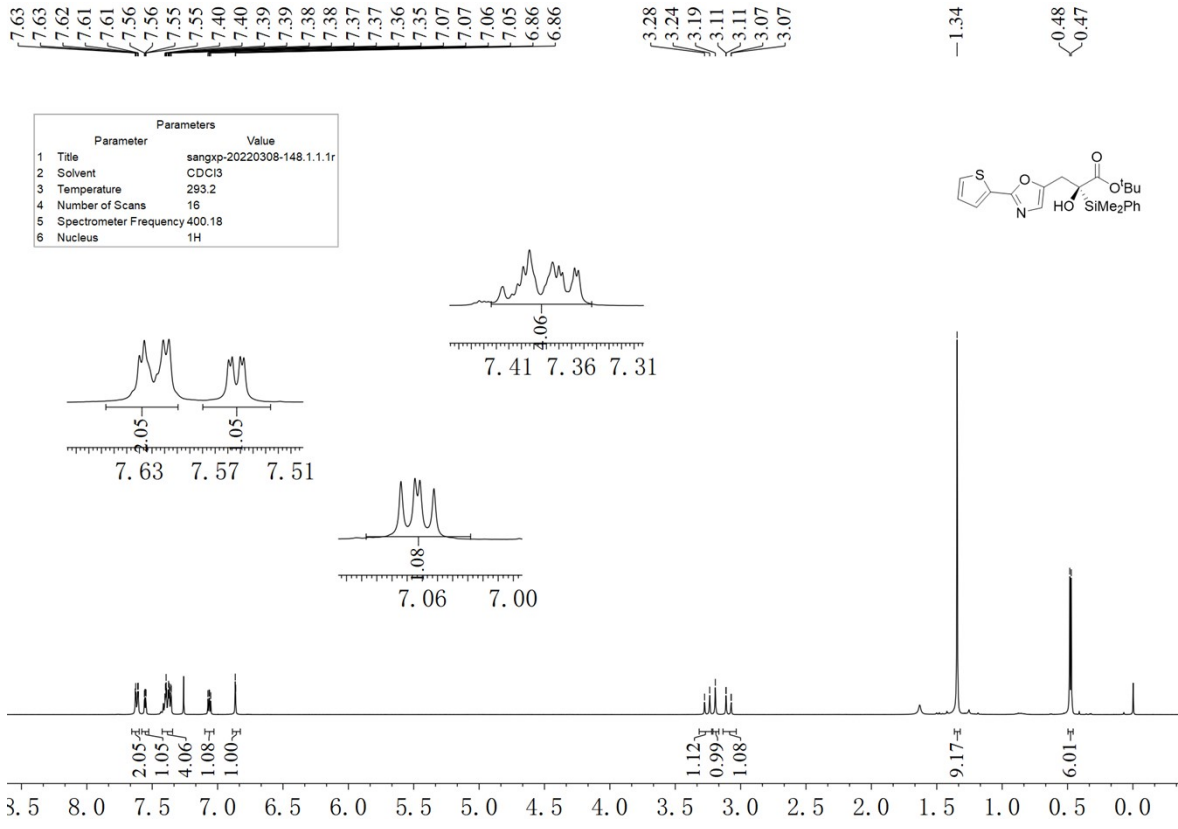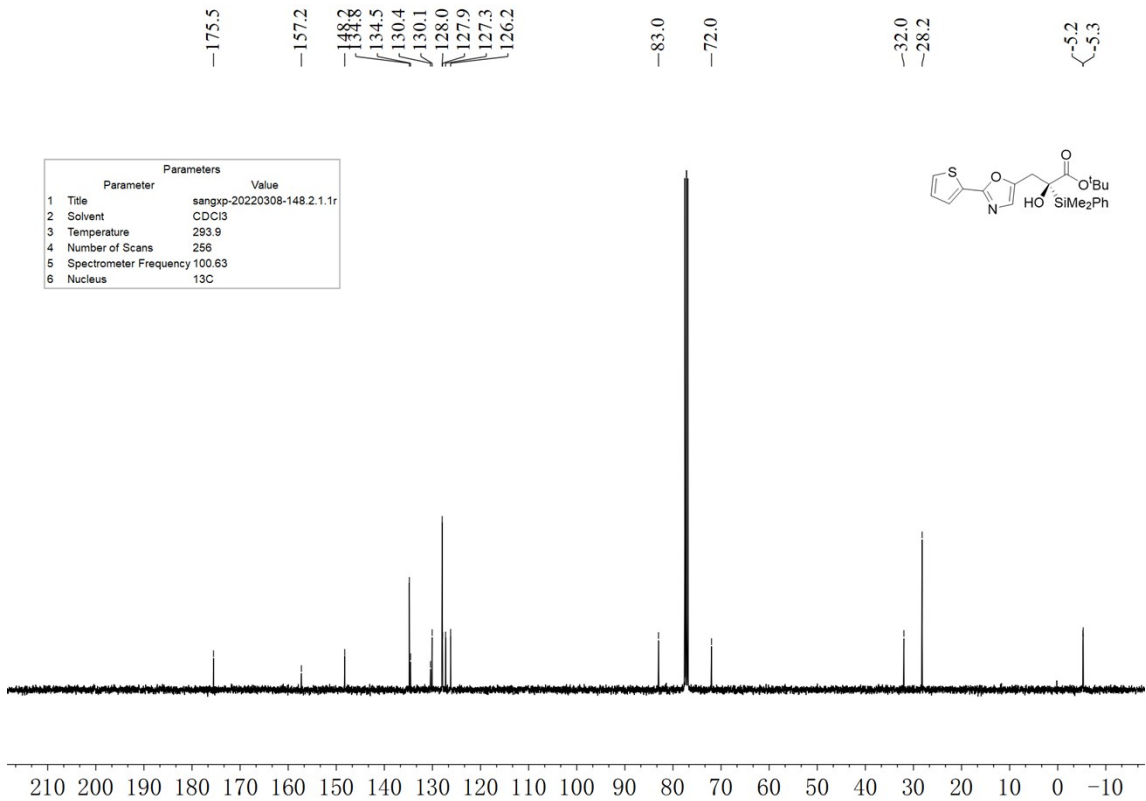

C25

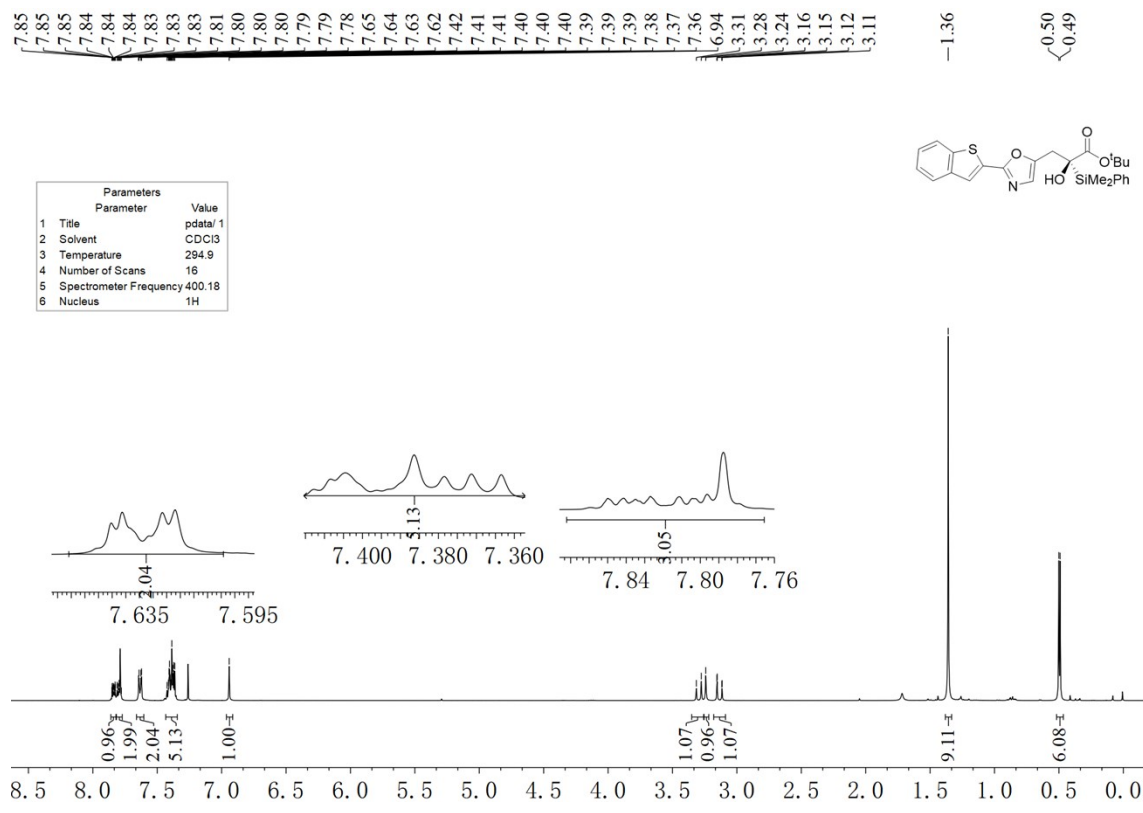

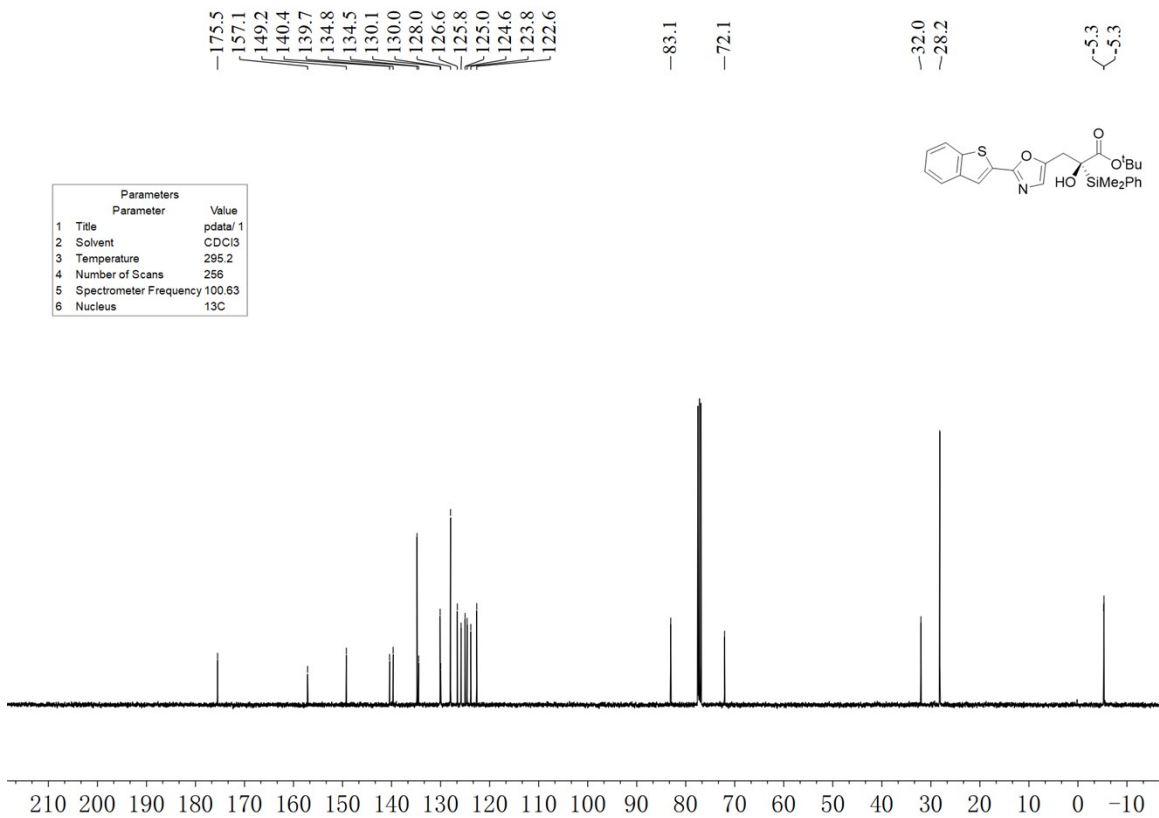

C26

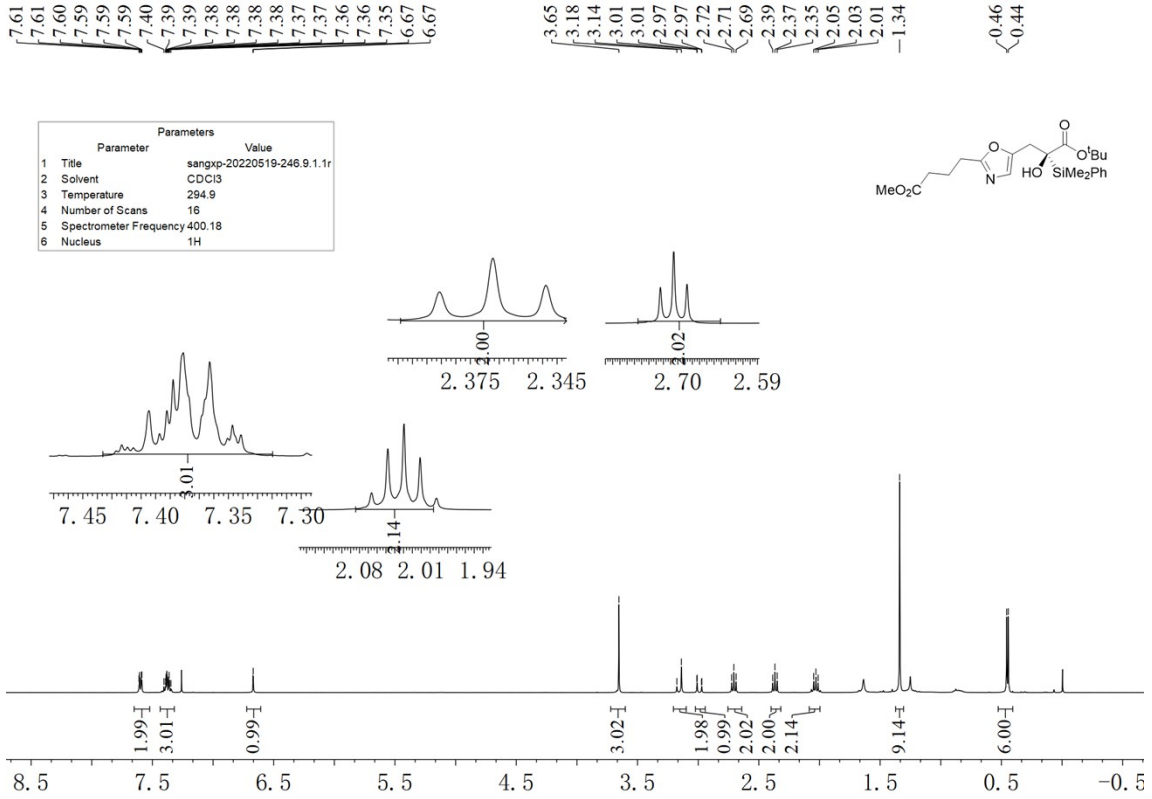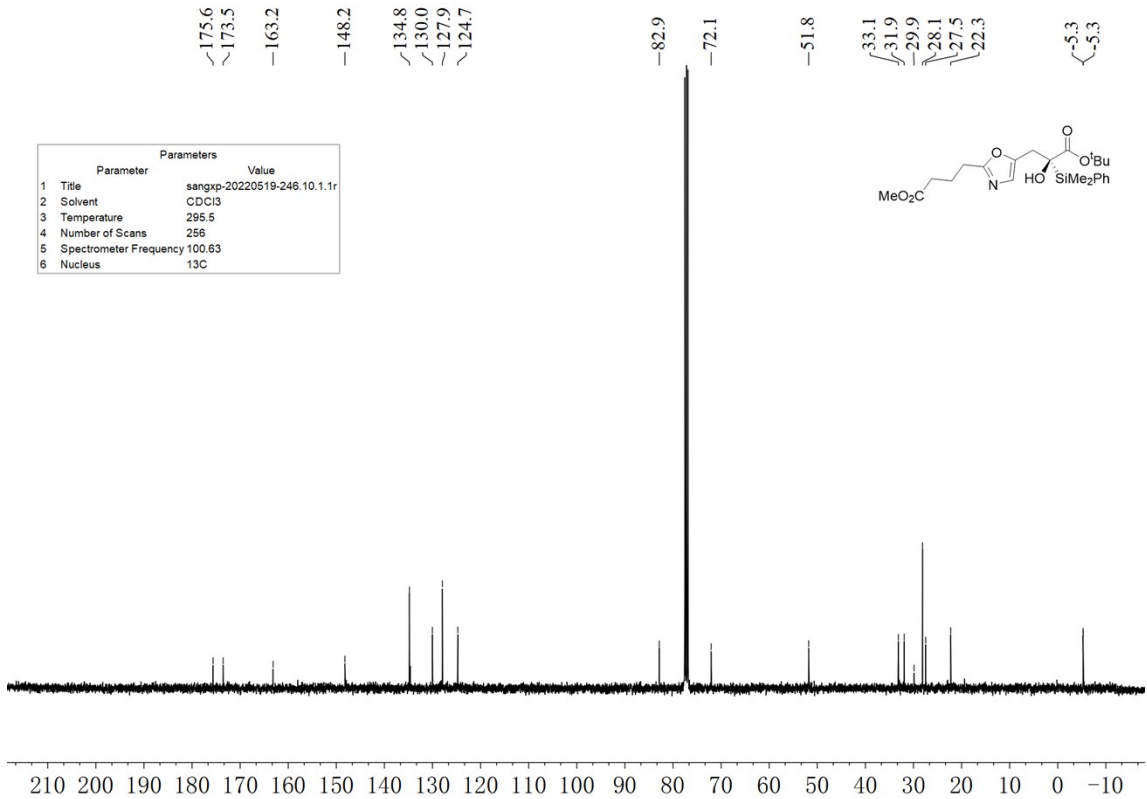

C27

7.61  
7.61  
7.59  
7.59  
7.40  
7.40  
7.39  
7.39  
7.38  
7.38  
7.37  
7.37  
7.36  
7.35  
6.66

3.18  
3.14  
3.12  
3.01  
2.97  
2.97  
2.64  
2.63  
2.61  
1.70  
1.68  
1.66  
1.34  
1.27  
1.25  
1.24  
0.89  
0.87  
0.86  
0.46  
0.44

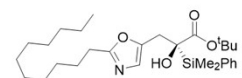

| Parameters               |                            |  |
|--------------------------|----------------------------|--|
| Parameter                | Value                      |  |
| 1 Title                  | sangxp-20220518-241.1.1.1r |  |
| 2 Solvent                | CDCl3                      |  |
| 3 Temperature            | 295.0                      |  |
| 4 Number of Scans        | 16                         |  |
| 5 Spectrometer Frequency | 400.18                     |  |
| 6 Nucleus                | 1H                         |  |

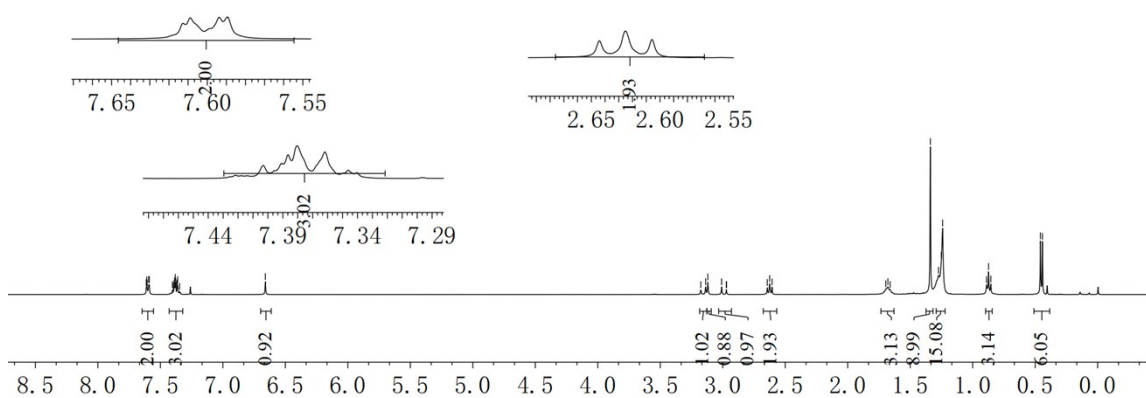

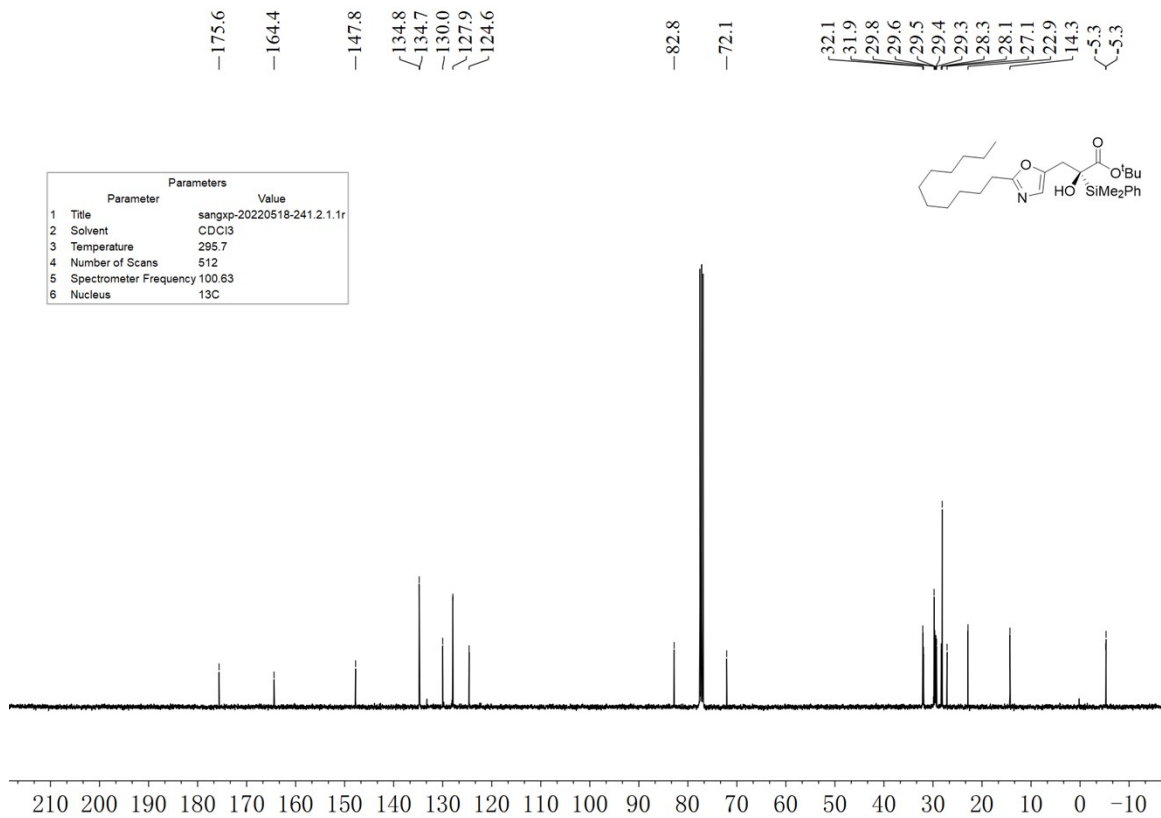



C28

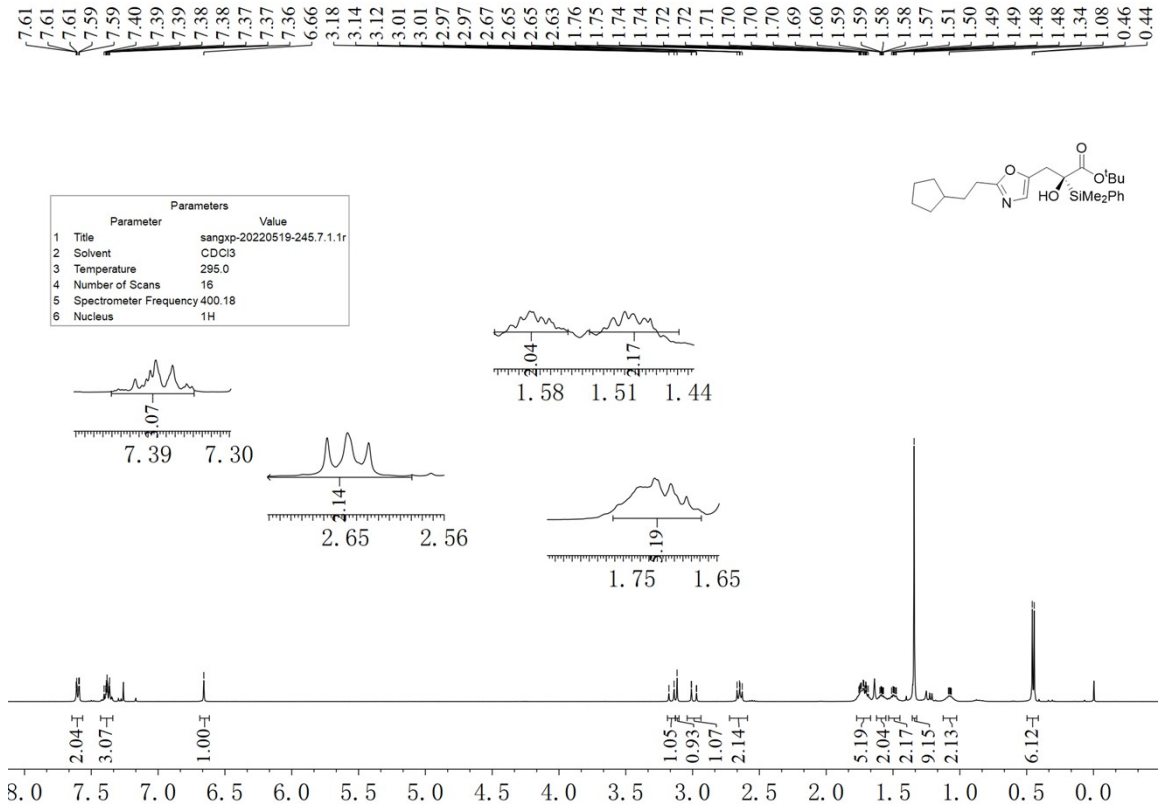

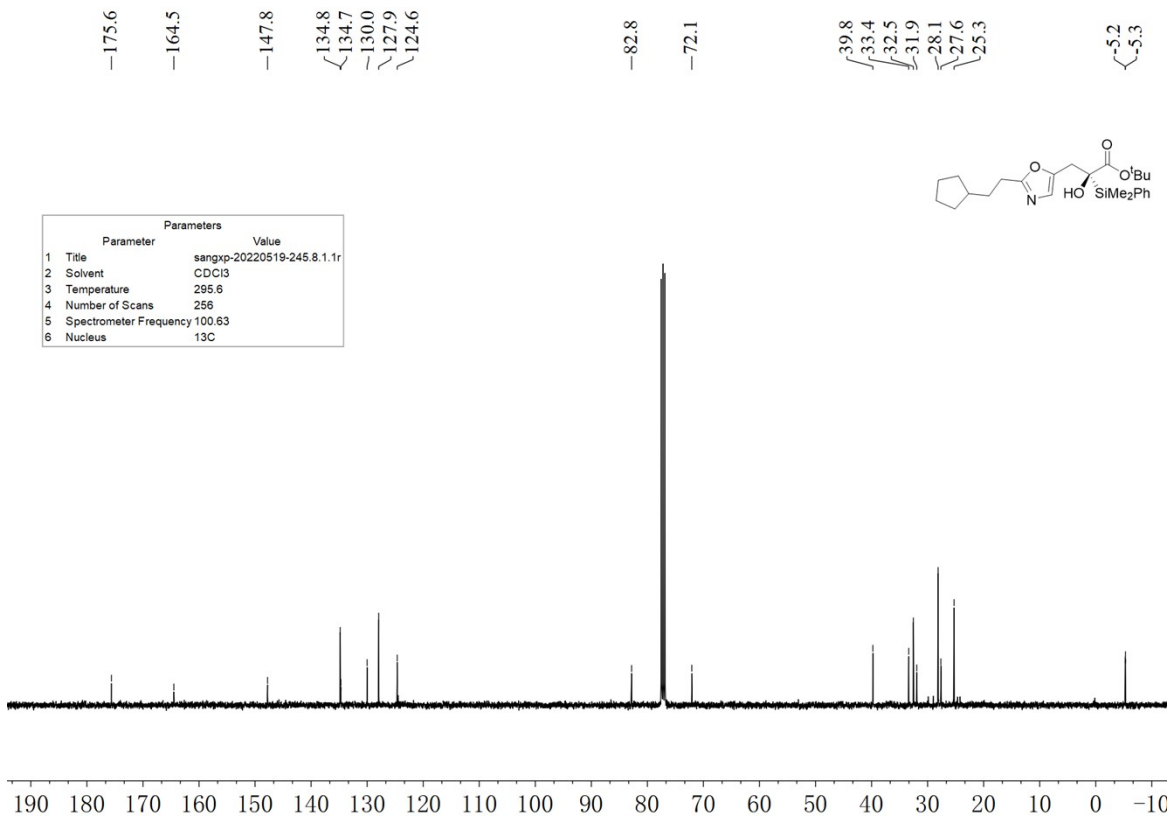

C29

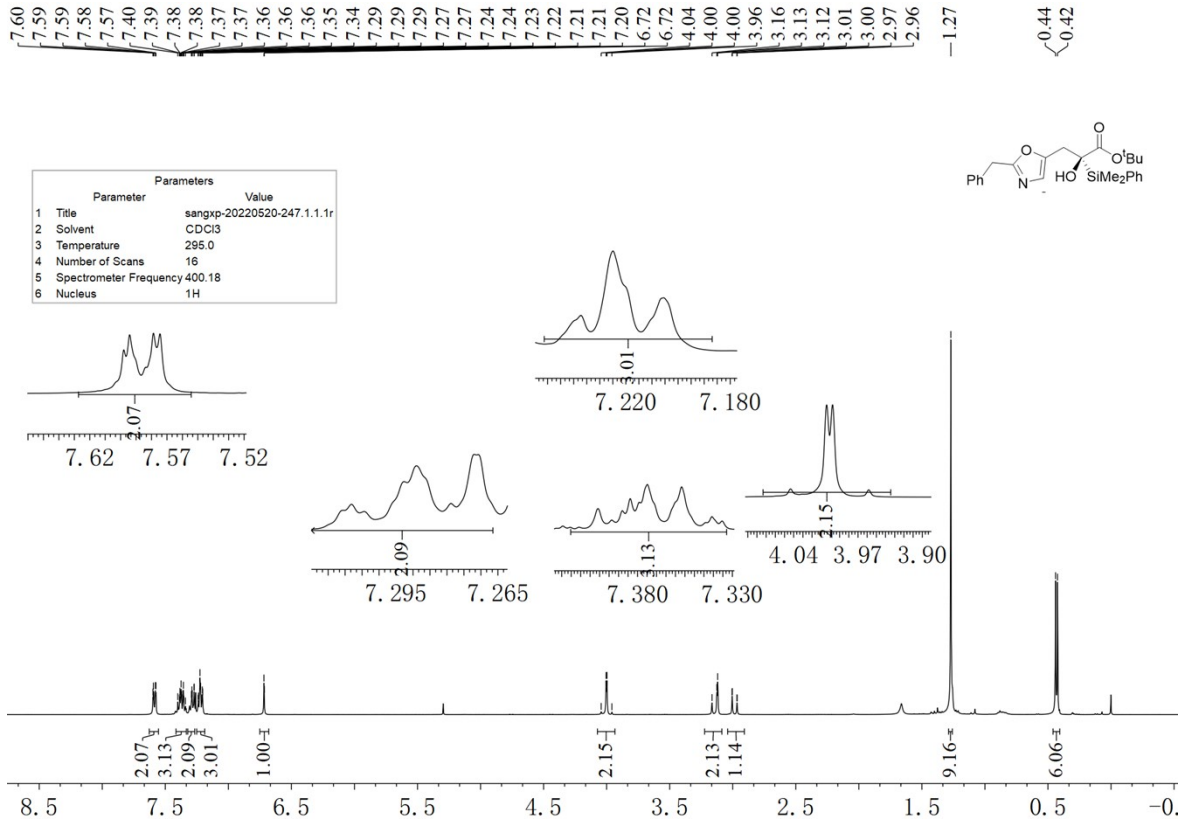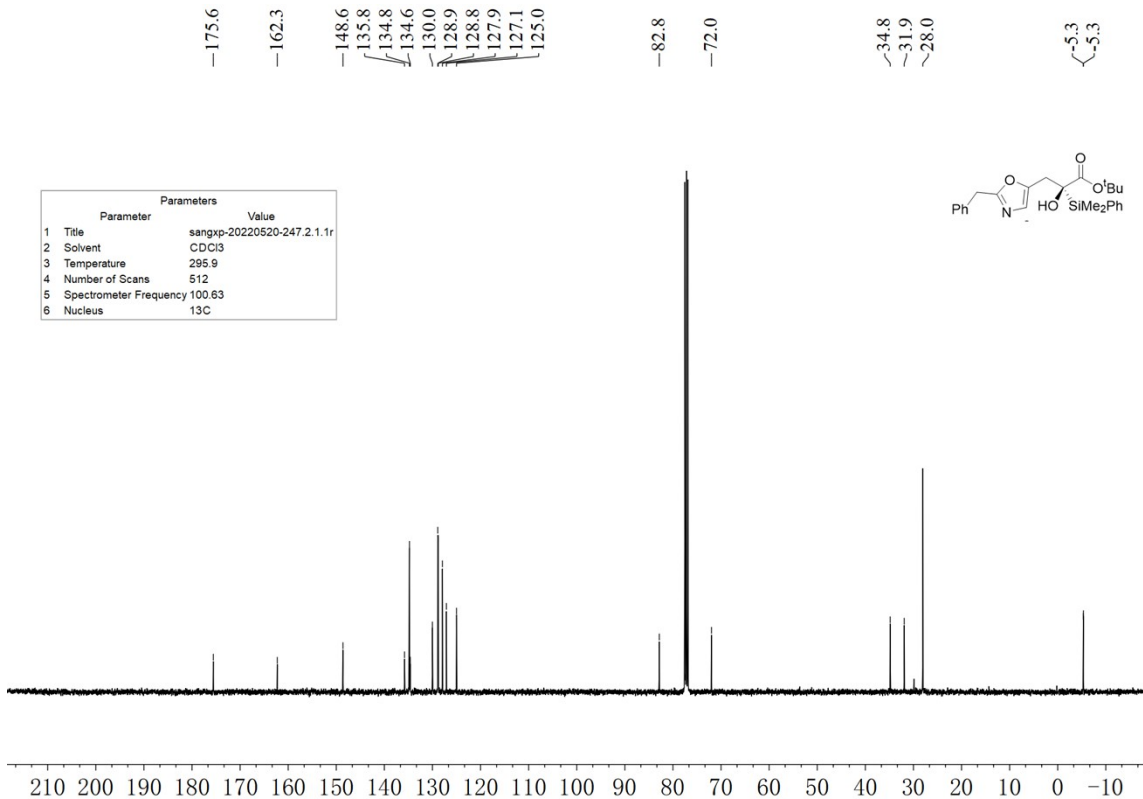

C30

7.61  
7.61  
7.60  
7.60  
7.59  
7.59  
7.40  
7.39  
7.38  
7.38  
7.38  
7.37  
7.37  
7.36  
7.36  
6.69  
3.53  
3.51  
3.51  
3.49  
3.49  
3.49  
3.19  
3.19  
3.15  
3.15  
3.12  
3.12  
3.02  
3.02  
2.98  
2.98  
2.35  
2.35  
2.35  
2.34  
2.34  
2.33  
2.33  
2.32  
2.32  
2.32  
2.31  
2.31  
2.30  
2.30  
2.30  
2.29  
2.29  
2.29  
2.28  
2.28  
2.27  
2.27  
2.26  
2.26  
1.99  
1.99  
1.33  
1.33  
0.46  
0.46

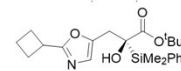

| Parameters               |        |
|--------------------------|--------|
| Parameter                | Value  |
| 1 Title                  | pdata1 |
| 2 Solvent                | CDCl3  |
| 3 Temperature            | 295.0  |
| 4 Number of Scans        | 16     |
| 5 Spectrometer Frequency | 400.18 |
| 6 Nucleus                | 1H     |

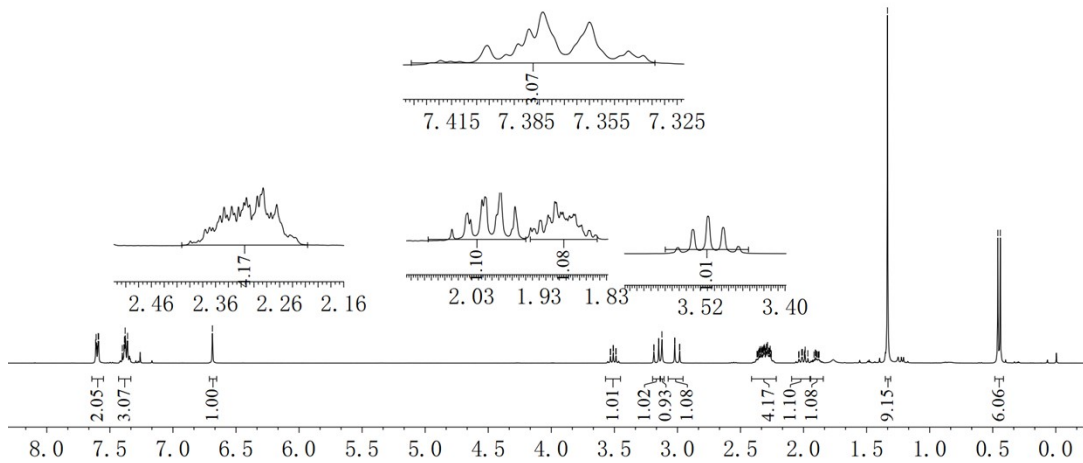

-175.6  
-166.5  
-147.8  
-134.8  
-134.7  
-130.0  
-127.9  
-124.7  
-82.8  
-72.0  
33.2  
32.0  
28.1  
27.4  
27.3  
18.7  
-5.3  
-5.3

| Parameters               |        |
|--------------------------|--------|
| Parameter                | Value  |
| 1 Title                  | pdata1 |
| 2 Solvent                | CDCl3  |
| 3 Temperature            | 295.6  |
| 4 Number of Scans        | 256    |
| 5 Spectrometer Frequency | 100.63 |
| 6 Nucleus                | 13C    |

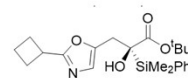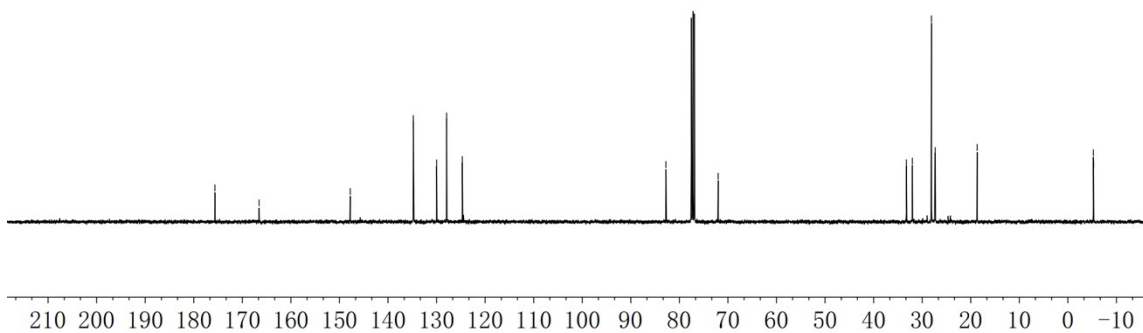

C31

7.61  
7.60  
7.60  
7.59  
7.59  
7.40  
7.39  
7.39  
7.38  
7.38  
7.37  
7.36  
7.36  
7.36  
7.35  
7.34  
7.34  
6.66  
6.66  
6.66  
3.17  
3.13  
3.13  
3.02  
3.02  
2.99  
2.98  
2.67  
2.66  
2.65  
2.00  
1.99  
1.97  
1.96  
1.96  
1.78  
1.77  
1.76  
1.75  
1.75  
1.74  
1.74  
1.73  
1.68  
1.52  
1.51  
1.49  
1.48  
1.32  
0.46  
0.43

| Parameters               |                            |
|--------------------------|----------------------------|
| Parameter                | Value                      |
| 1 Title                  | sangxp-20220519-244.5.1.1r |
| 2 Solvent                | CDCl3                      |
| 3 Temperature            | 295.0                      |
| 4 Number of Scans        | 16                         |
| 5 Spectrometer Frequency | 400.18                     |
| 6 Nucleus                | 1H                         |

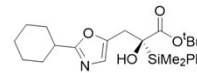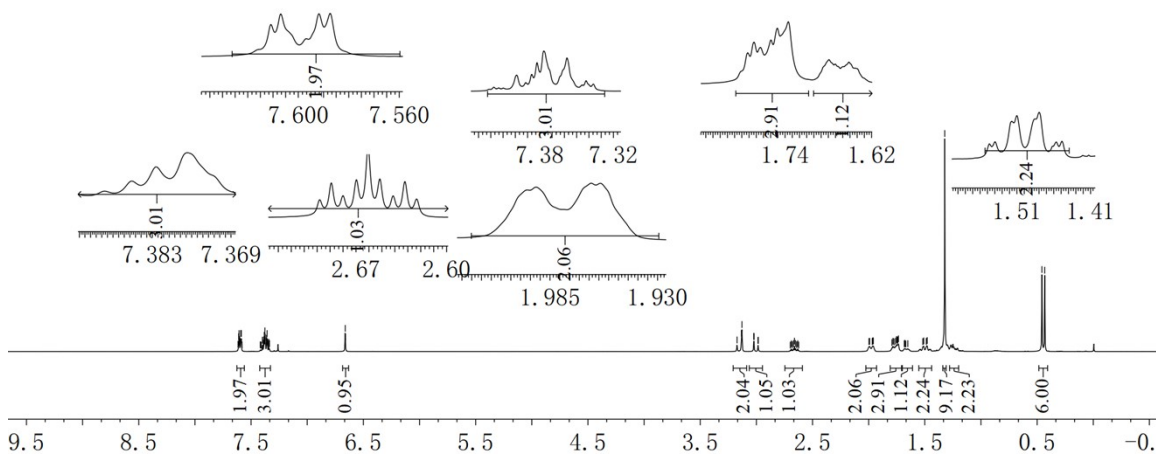

-175.7  
-167.5  
-147.6  
134.8  
130.0  
127.9  
124.4  
-82.7  
-72.1  
37.6  
32.0  
30.7  
30.6  
28.1  
25.9  
25.8  
-5.3  
-5.3

| Parameters               |                            |
|--------------------------|----------------------------|
| Parameter                | Value                      |
| 1 Title                  | sangxp-20220519-244.6.1.1r |
| 2 Solvent                | CDCl3                      |
| 3 Temperature            | 295.6                      |
| 4 Number of Scans        | 256                        |
| 5 Spectrometer Frequency | 100.63                     |
| 6 Nucleus                | 13C                        |

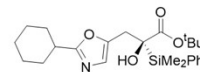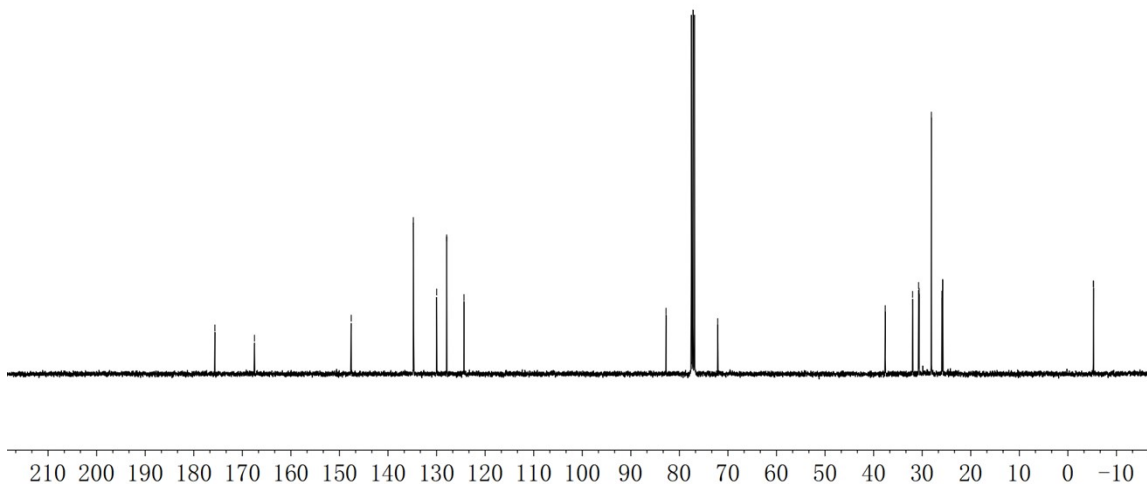

**C32**

7.62  
7.61  
7.61  
7.60  
7.59  
7.40  
7.39  
7.38  
7.38  
7.37  
7.36  
7.36  
7.35  
6.66

3.18  
3.14  
3.05  
3.05  
3.02  
3.01

-1.31

0.46  
0.43

| Parameters               |                            |
|--------------------------|----------------------------|
| Parameter                | Value                      |
| 1 Title                  | sangxp-20220511-224.1.1.1r |
| 2 Solvent                | CDCl3                      |
| 3 Temperature            | 295.3                      |
| 4 Number of Scans        | 16                         |
| 5 Spectrometer Frequency | 400.18                     |
| 6 Nucleus                | 1H                         |

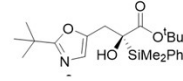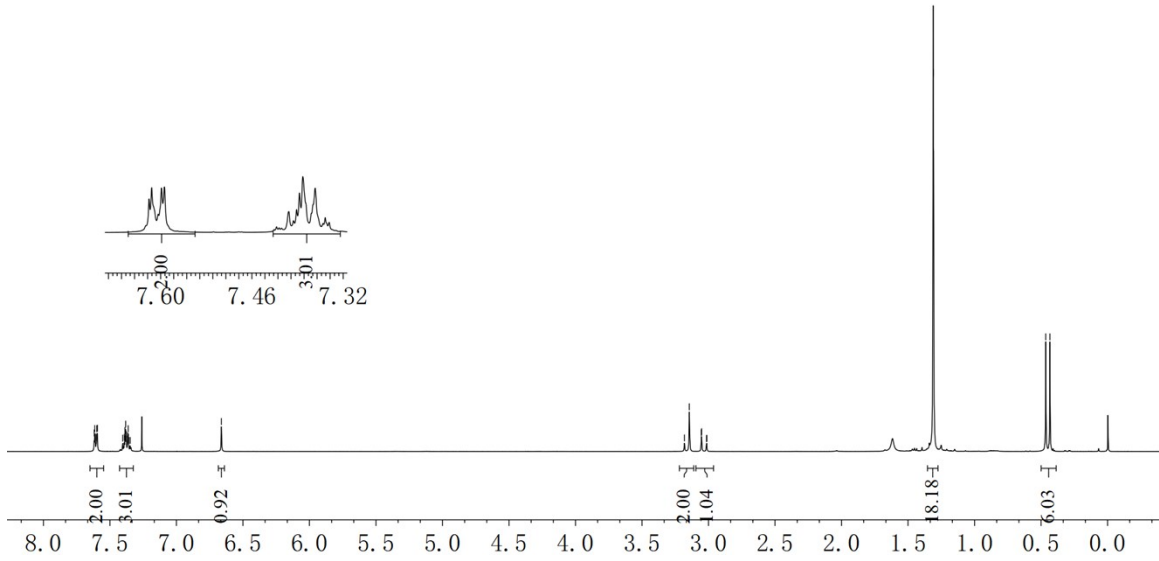

175.7  
170.4

147.9

134.8  
134.7

130.0  
127.9

124.2

82.7

72.0

33.7  
32.0

28.7  
28.2

5.2  
5.3

| Parameters               |                            |
|--------------------------|----------------------------|
| Parameter                | Value                      |
| 1 Title                  | sangxp-20220511-224.2.1.1r |
| 2 Solvent                | CDCl3                      |
| 3 Temperature            | 295.9                      |
| 4 Number of Scans        | 256                        |
| 5 Spectrometer Frequency | 100.63                     |
| 6 Nucleus                | 13C                        |

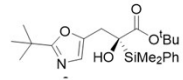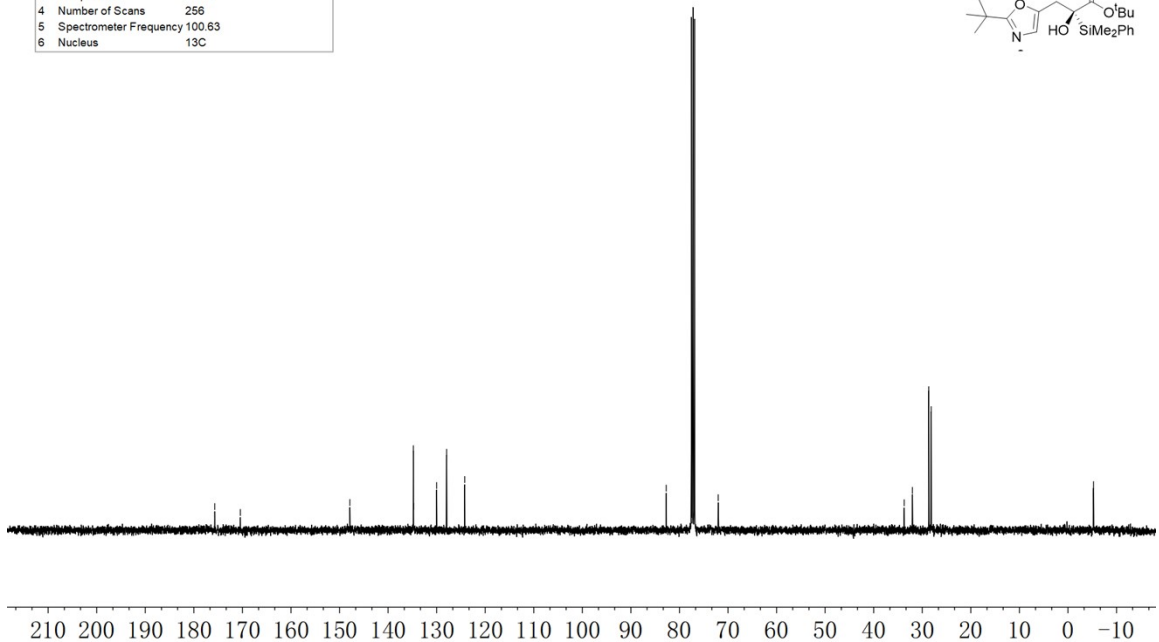

C33

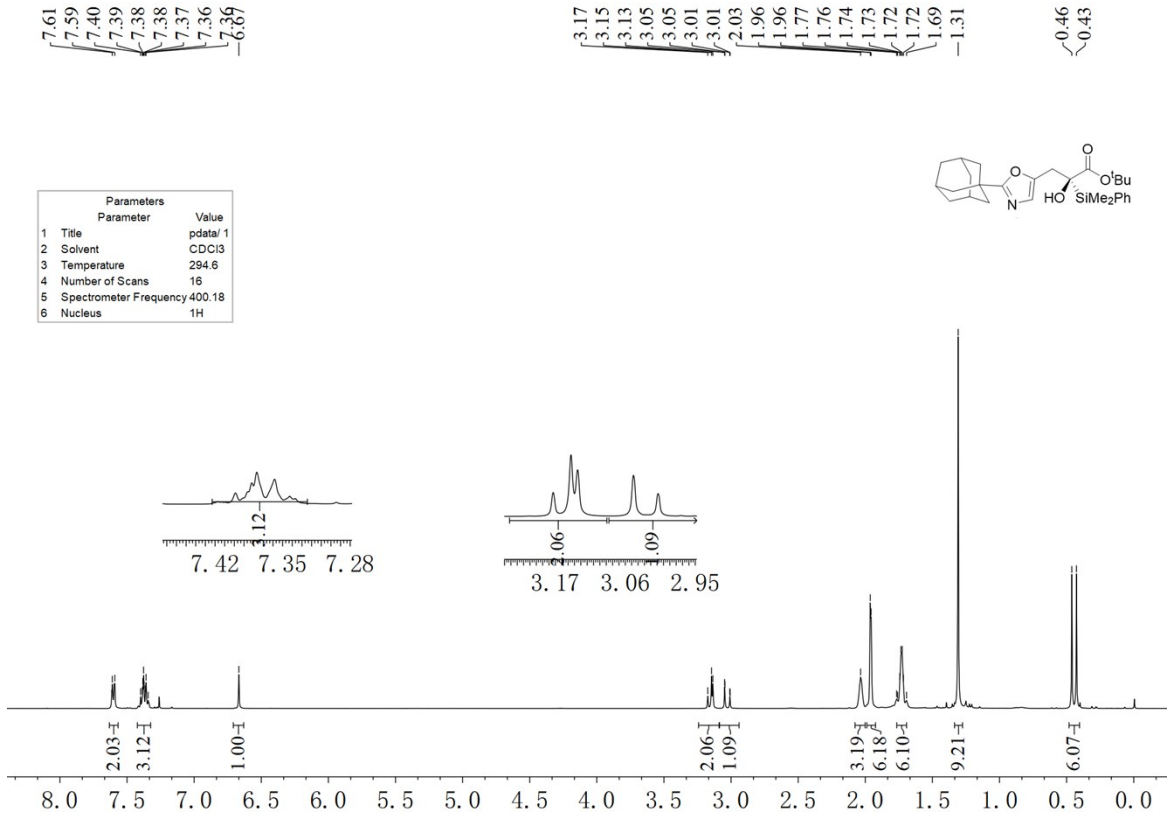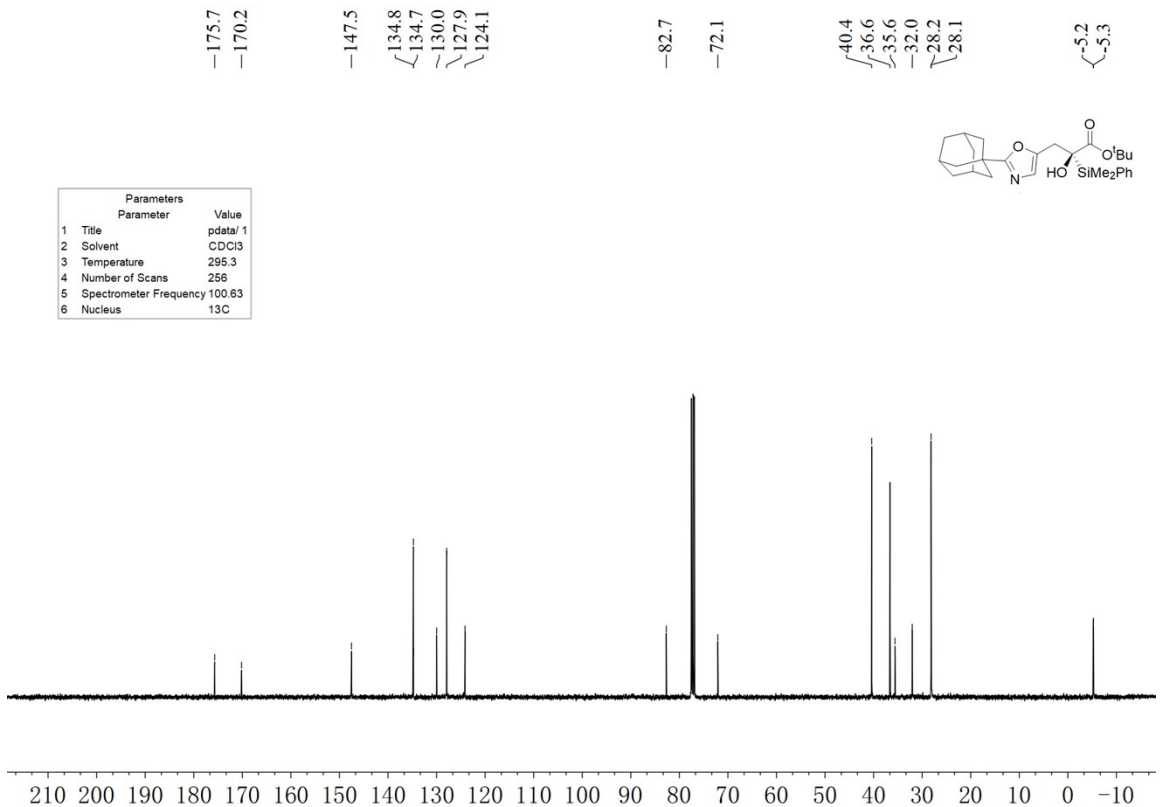

C34

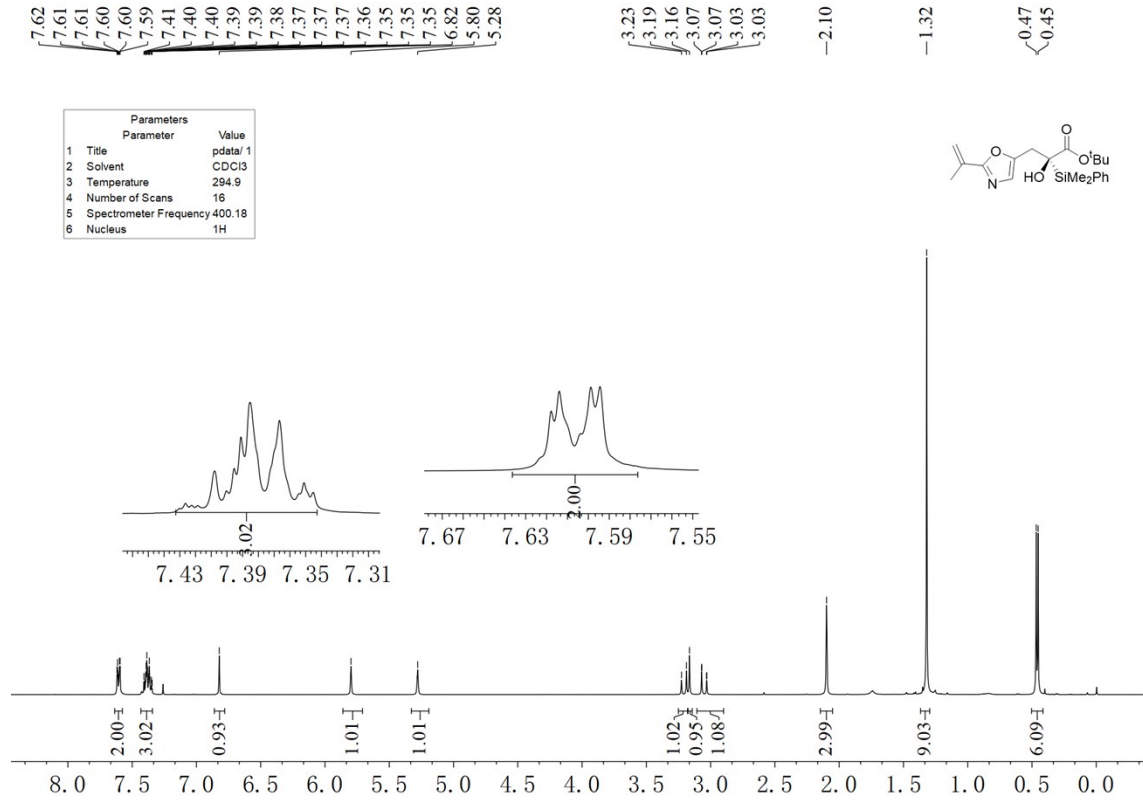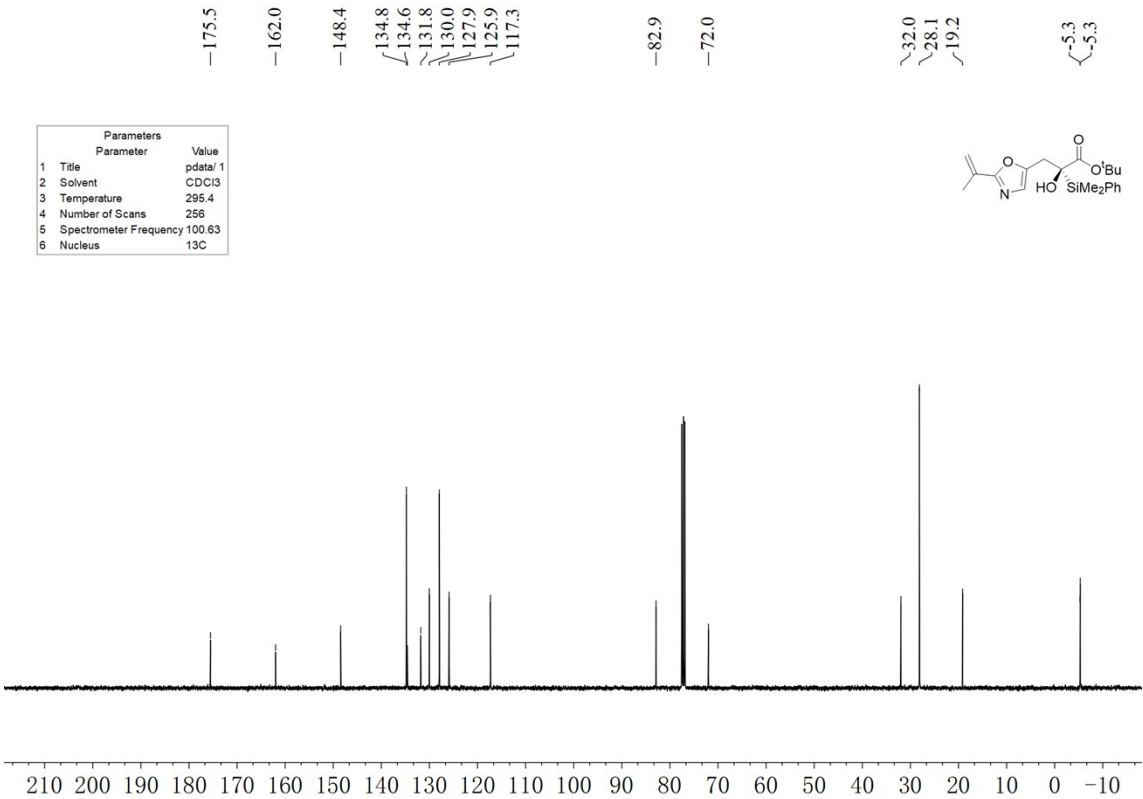



C35

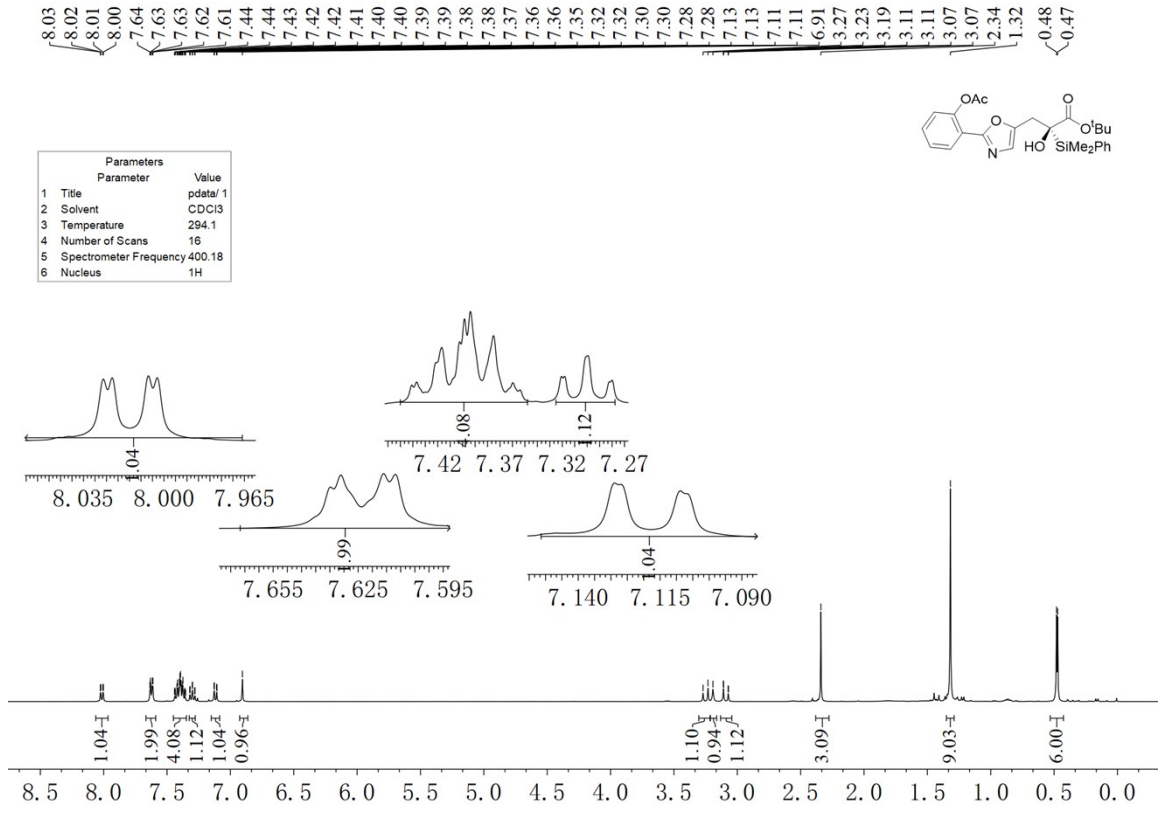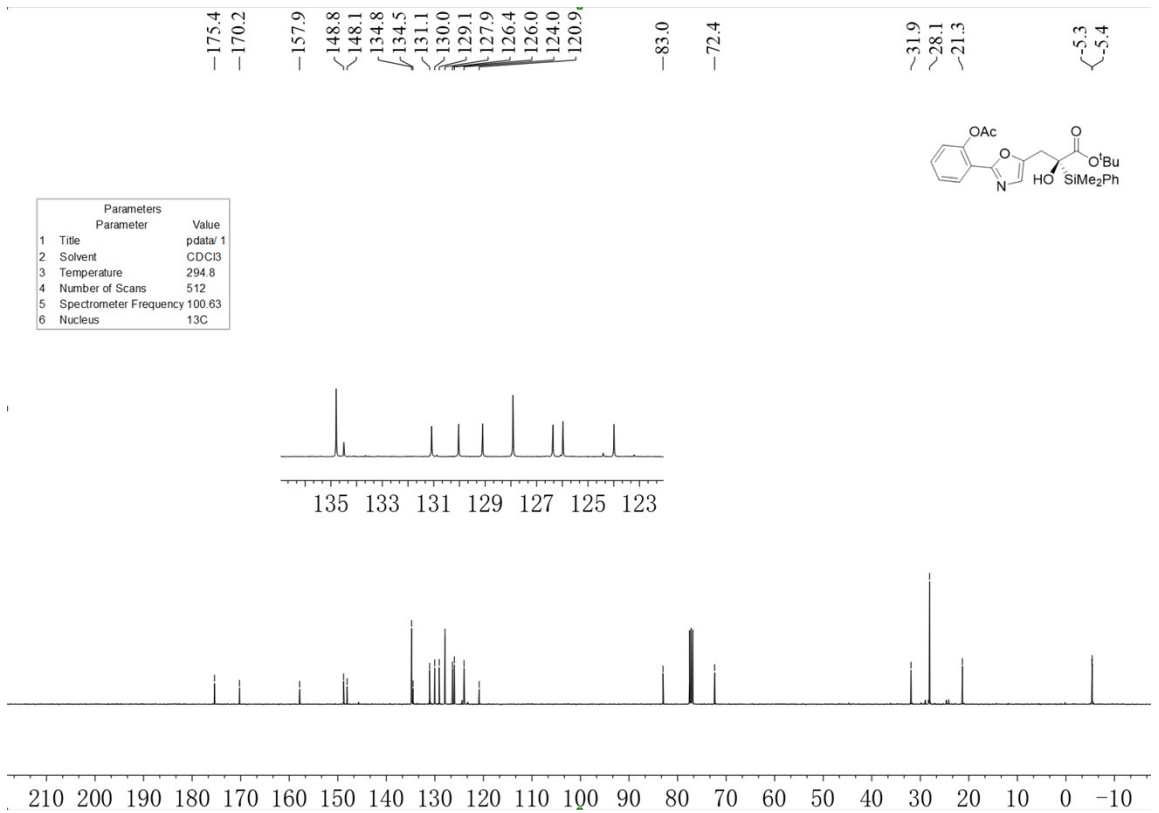

C36

8.06  
8.04  
7.84  
7.82  
7.62  
7.62  
7.60  
7.60  
7.41  
7.40  
7.39  
7.39  
7.38  
7.37  
7.37  
7.37  
7.35  
6.96

3.31  
3.27  
3.22  
3.16  
3.15  
3.12  
3.12  
3.11  
3.09  
3.09  
3.08  
3.07  
1.56  
1.54  
1.53  
1.52  
1.50  
1.33  
0.87  
0.86  
0.84  
0.48  
0.47

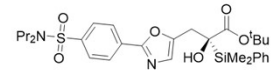

| Parameters               |          |  |
|--------------------------|----------|--|
| Parameter                | Value    |  |
| 1 Title                  | pdata/ 1 |  |
| 2 Solvent                | CDCl3    |  |
| 3 Temperature            | 294.4    |  |
| 4 Number of Scans        | 16       |  |
| 5 Spectrometer Frequency | 400.18   |  |
| 6 Nucleus                | 1H       |  |

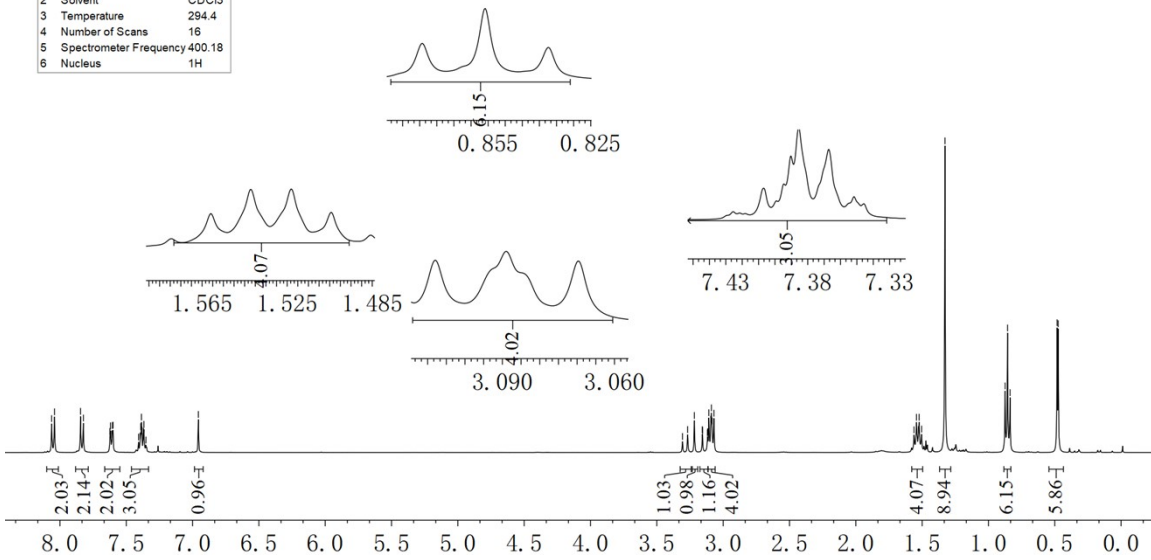

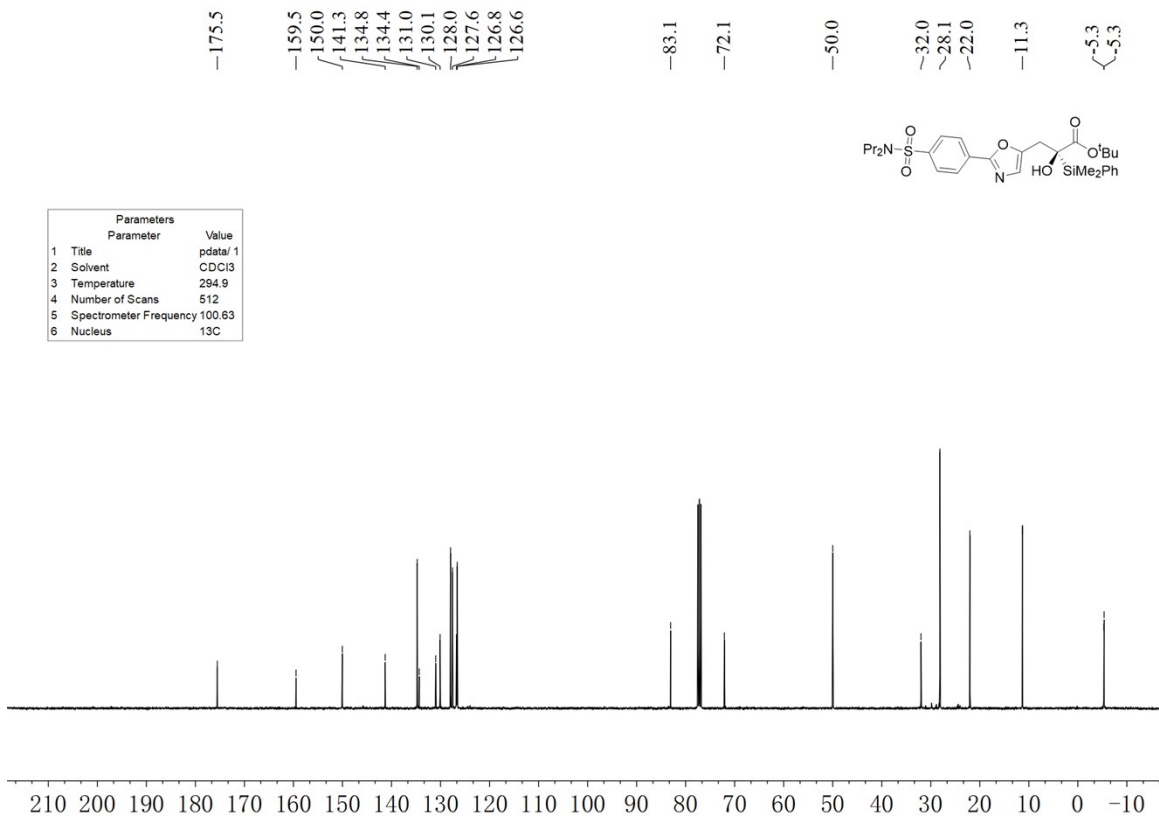

C37

8.76  
8.75  
8.25  
8.25  
8.24  
8.23  
8.23  
8.22  
8.21  
8.21  
8.14  
8.13  
8.13  
7.65  
7.65  
7.64  
7.63  
7.63  
7.60  
7.59  
7.57  
7.55  
7.42  
7.41  
7.41  
7.40  
7.39  
7.39  
7.39  
7.36  
7.36  
7.34  
7.34  
7.32  
7.30  
7.29  
7.29  
7.26  
6.98  
3.35  
3.31  
3.26  
3.19  
3.18  
3.15  
3.14  
1.36  
0.51  
0.50

| Parameters               |          |
|--------------------------|----------|
| Parameter                | Value    |
| 1 Title                  | pdata/ 1 |
| 2 Solvent                | CDCl3    |
| 3 Temperature            | 294.8    |
| 4 Number of Scans        | 16       |
| 5 Spectrometer Frequency | 400.18   |
| 6 Nucleus                | 1H       |

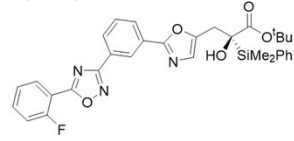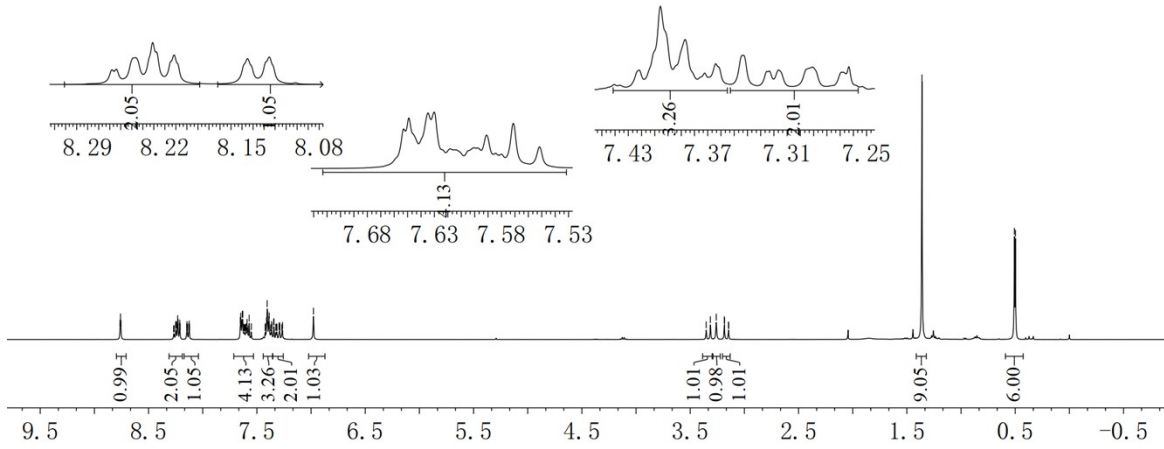

175.6  
173.1  
173.1  
168.3  
162.2  
160.2  
159.6  
149.3  
134.9  
134.8  
134.5  
131.2  
130.1  
129.5  
129.0  
128.9  
128.5  
128.0  
127.6  
126.5  
125.3  
124.9  
124.8  
117.4  
117.2  
113.0  
112.9  
83.1  
72.0  
32.1  
28.2  
5.2  
5.3

| Parameters               |          |
|--------------------------|----------|
| Parameter                | Value    |
| 1 Title                  | pdata/ 1 |
| 2 Solvent                | CDCl3    |
| 3 Temperature            | 295.3    |
| 4 Number of Scans        | 256      |
| 5 Spectrometer Frequency | 100.63   |
| 6 Nucleus                | 13C      |

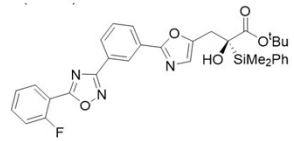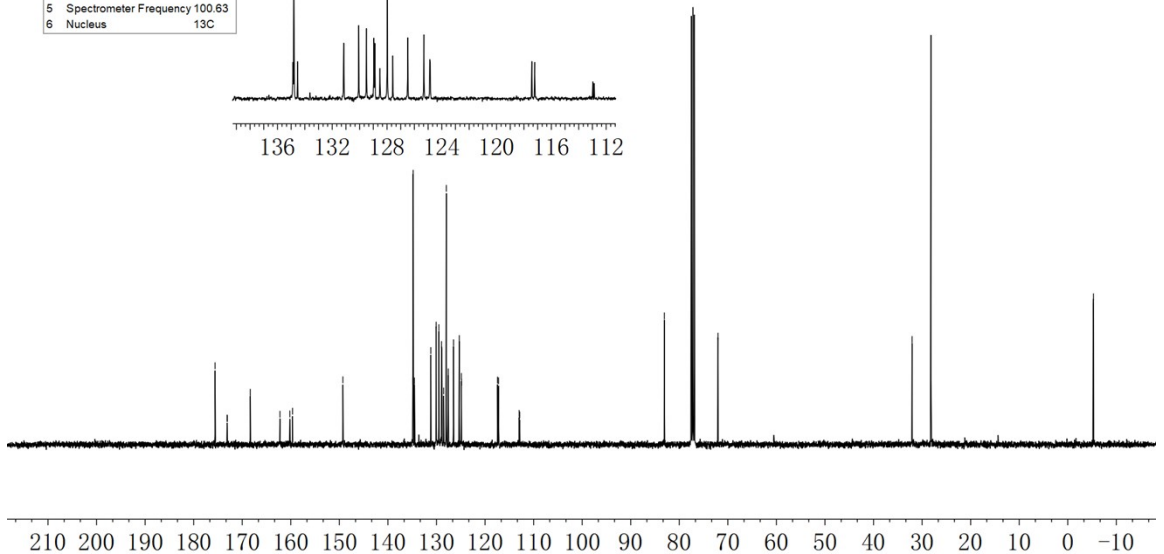

| Parameters               |        |   |
|--------------------------|--------|---|
| Parameter                | Value  |   |
| 1 Title                  | pdata1 | 1 |
| 2 Solvent                | CDCl3  |   |
| 3 Temperature            | 295.1  |   |
| 4 Number of Scans        | 16     |   |
| 5 Spectrometer Frequency | 376.55 |   |
| 6 Nucleus                | 19F    |   |

-108.17

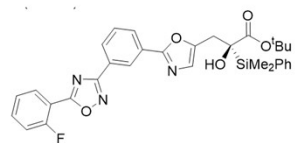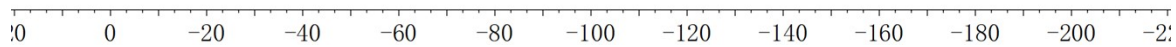

C38

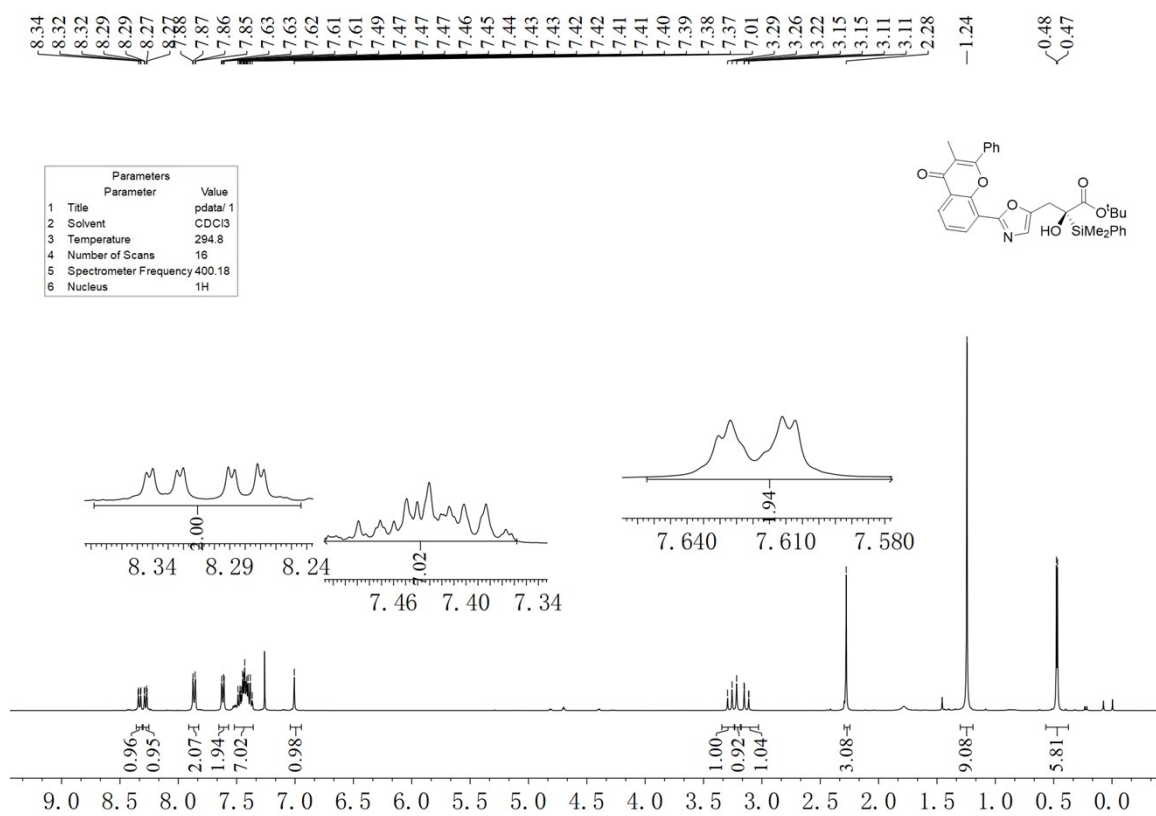

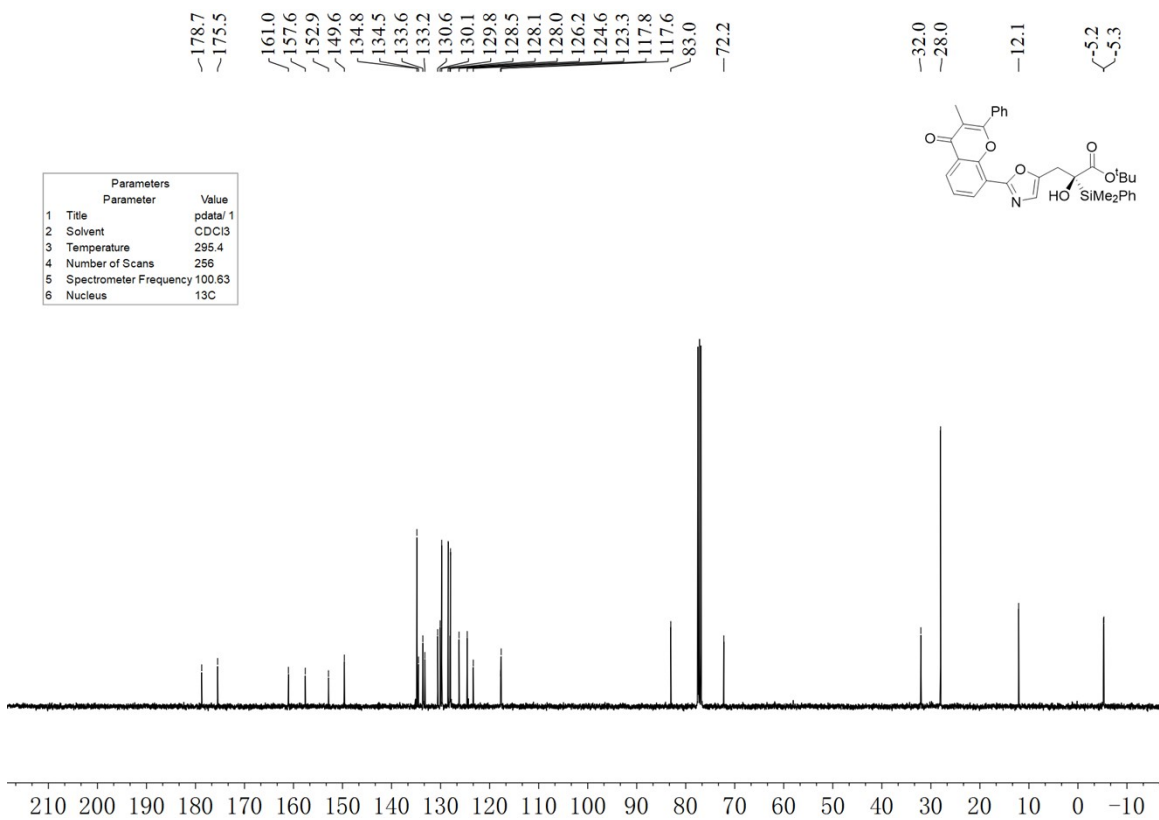

C39

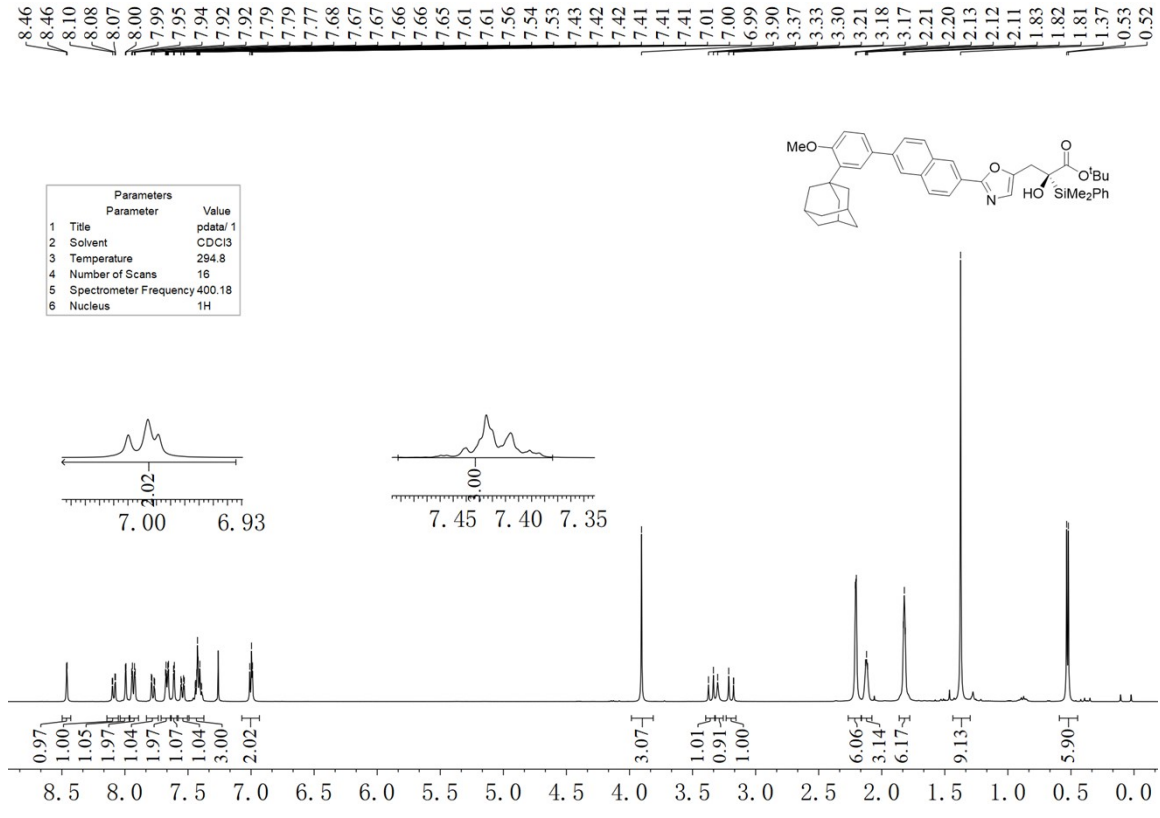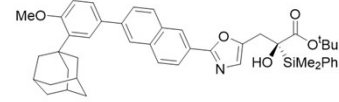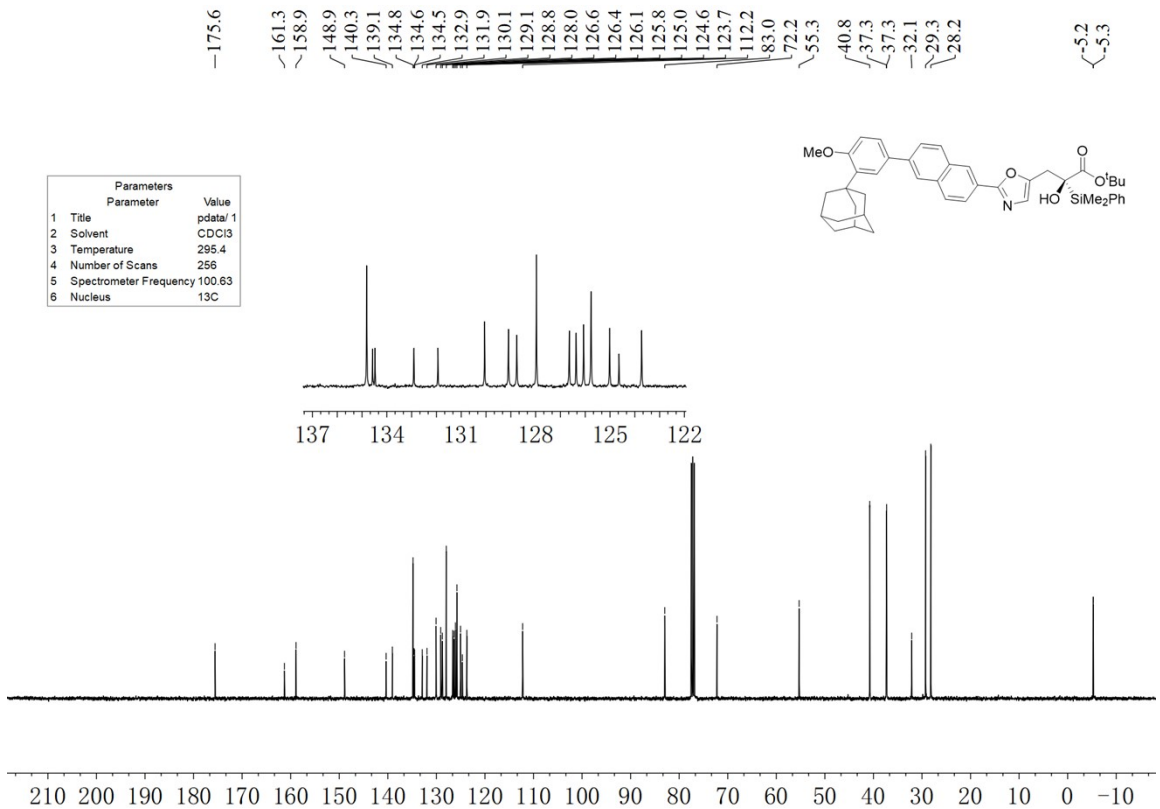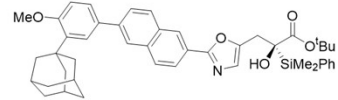



C40

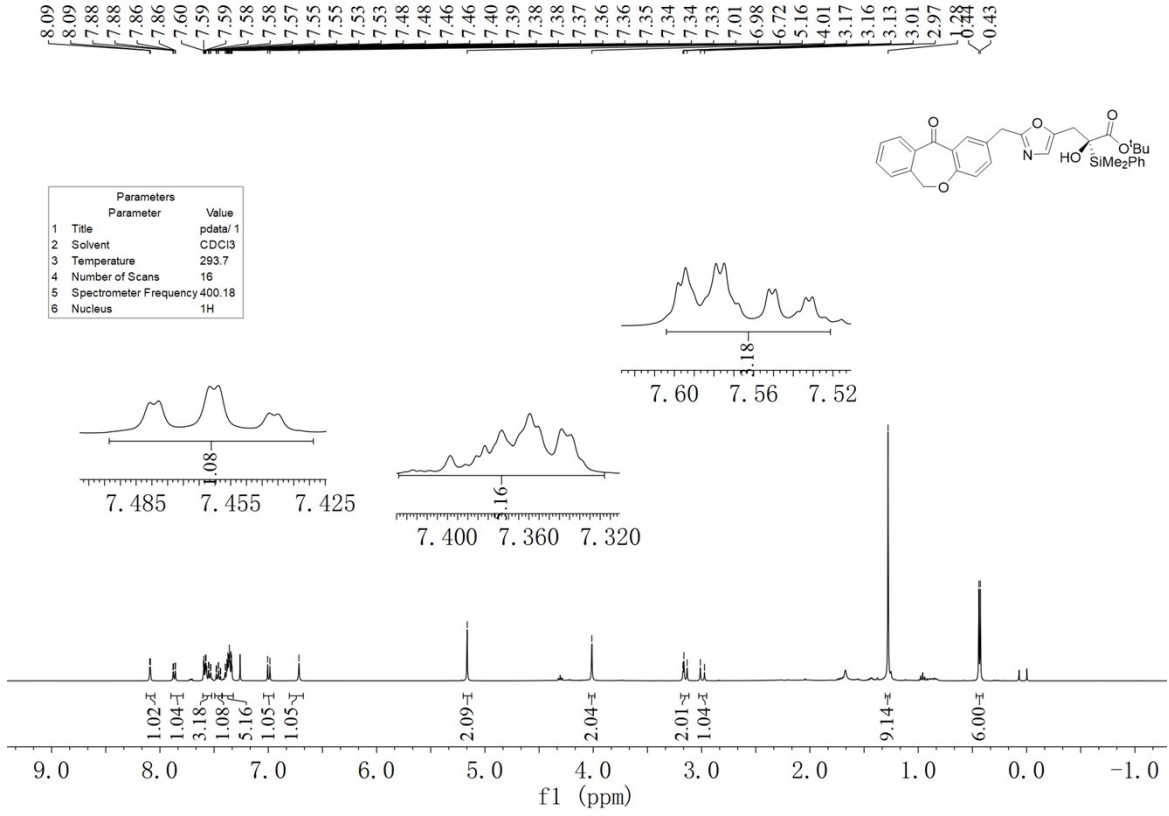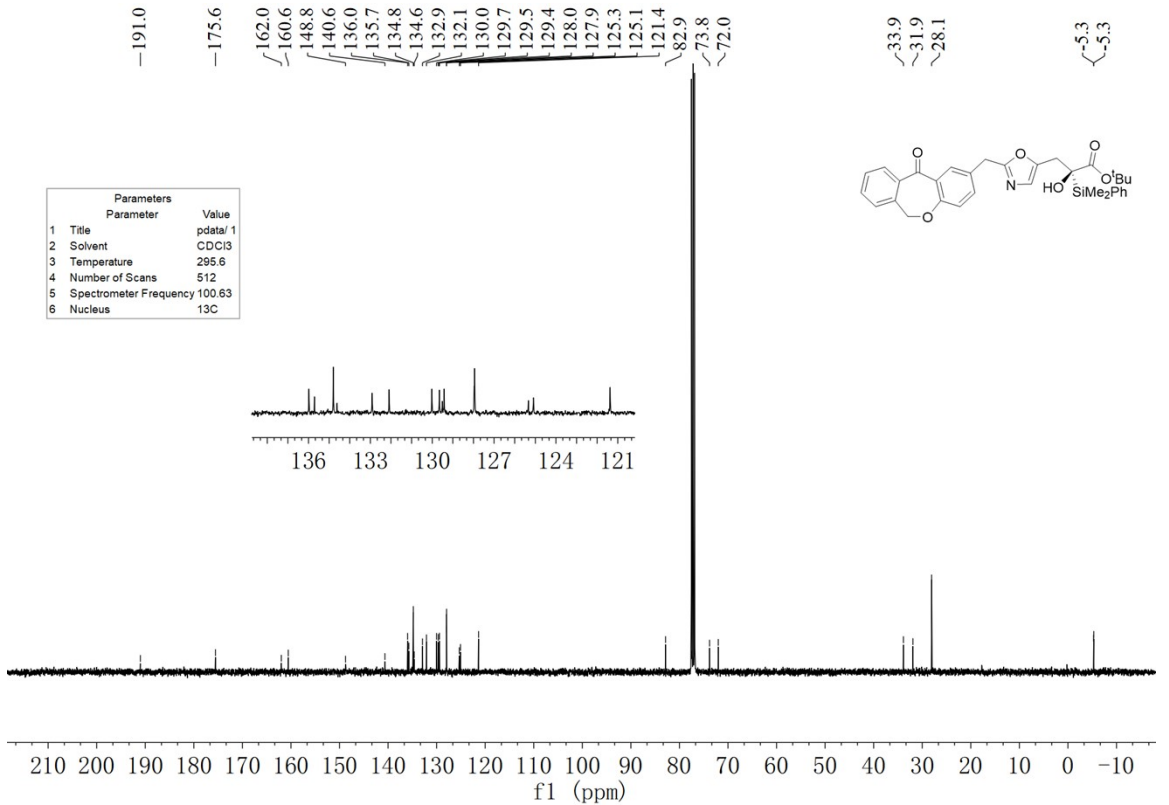

C41

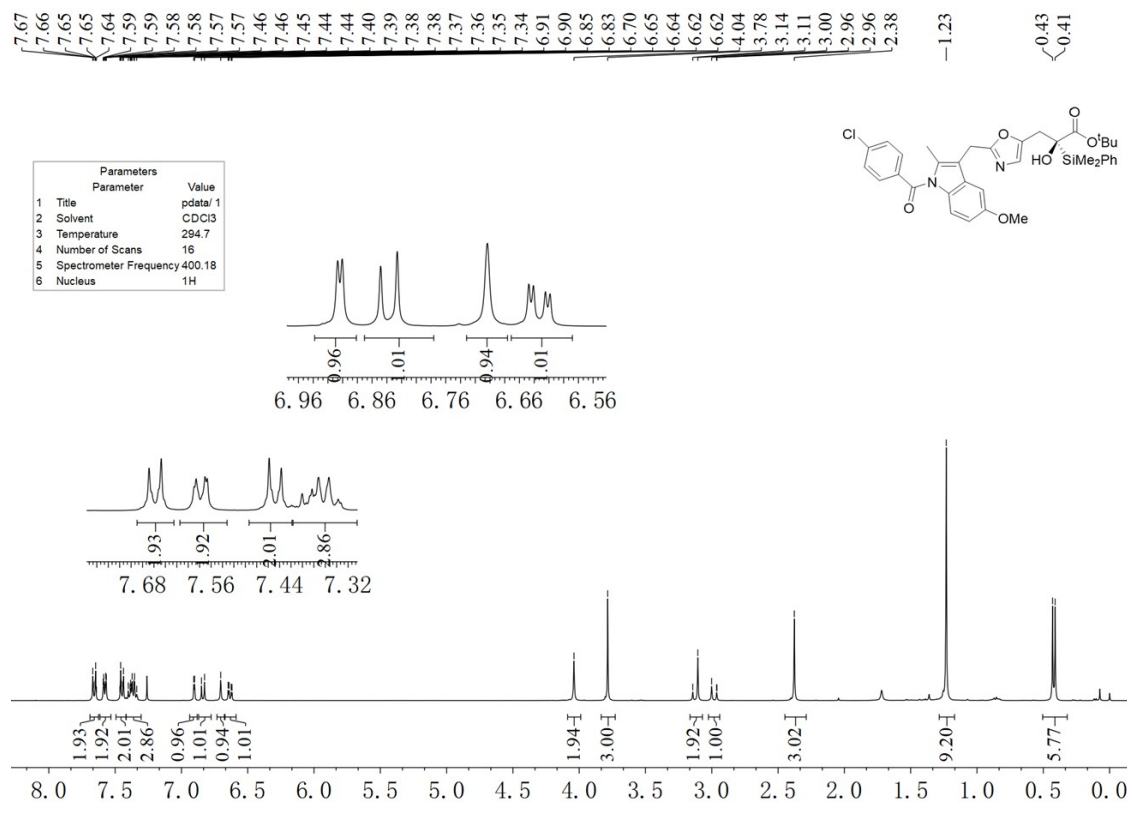

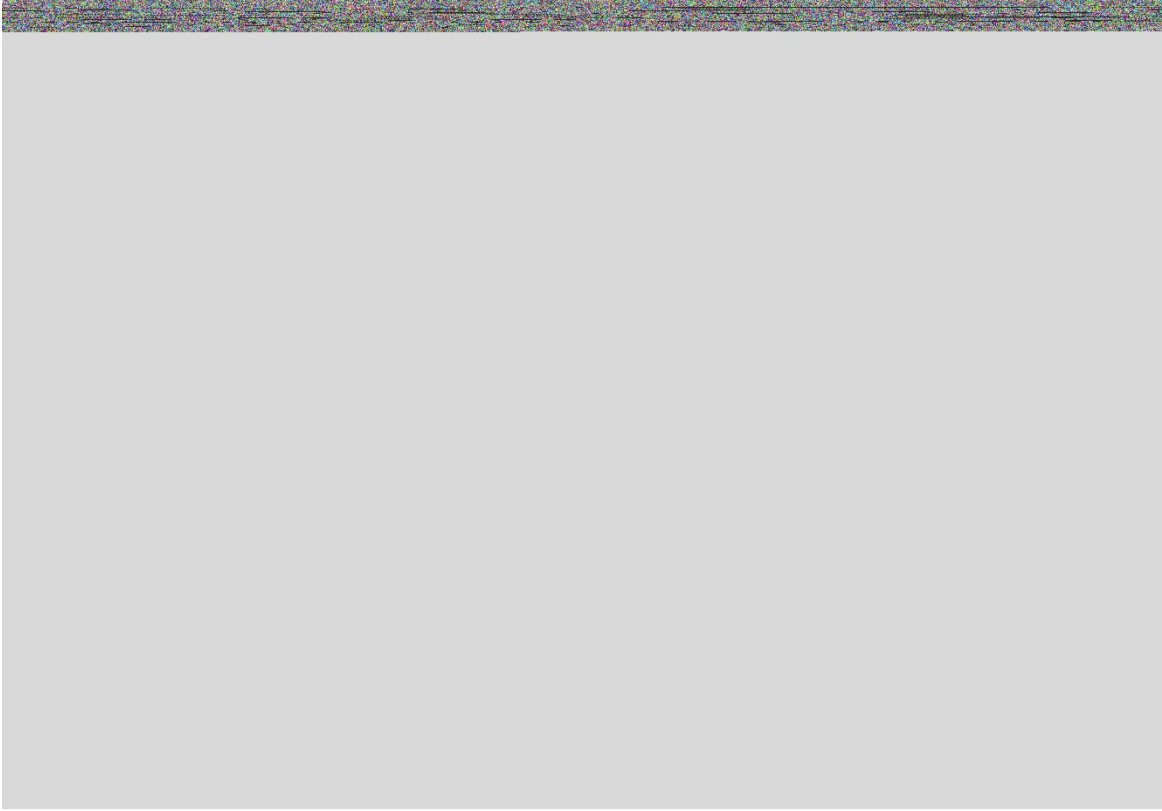

C42

7.60  
7.59  
7.59  
7.58  
7.58  
7.57  
7.40  
7.38  
7.38  
7.37  
7.37  
7.37  
7.36  
7.35  
7.11  
7.09  
7.09  
7.06  
7.06  
7.04

4.16  
4.14  
4.12  
4.10  
3.16  
3.13  
3.12  
3.01  
3.01  
2.98  
2.97  
2.43  
2.41  
1.84  
1.82  
1.80  
1.63  
1.62  
1.22  
0.89  
0.87  
0.44  
0.42

| Parameters |                        | Value   |
|------------|------------------------|---------|
| Parameter  |                        |         |
| 1          | Title                  | pdata/1 |
| 2          | Solvent                | CDCl3   |
| 3          | Temperature            | 294.7   |
| 4          | Number of Scans        | 16      |
| 5          | Spectrometer Frequency | 400.18  |
| 6          | Nucleus                | 1H      |

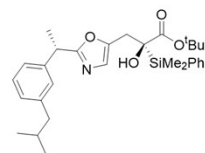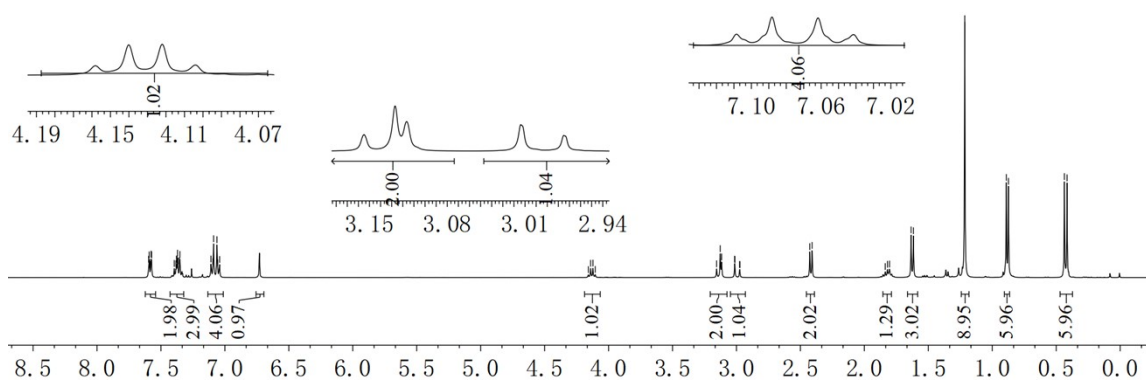

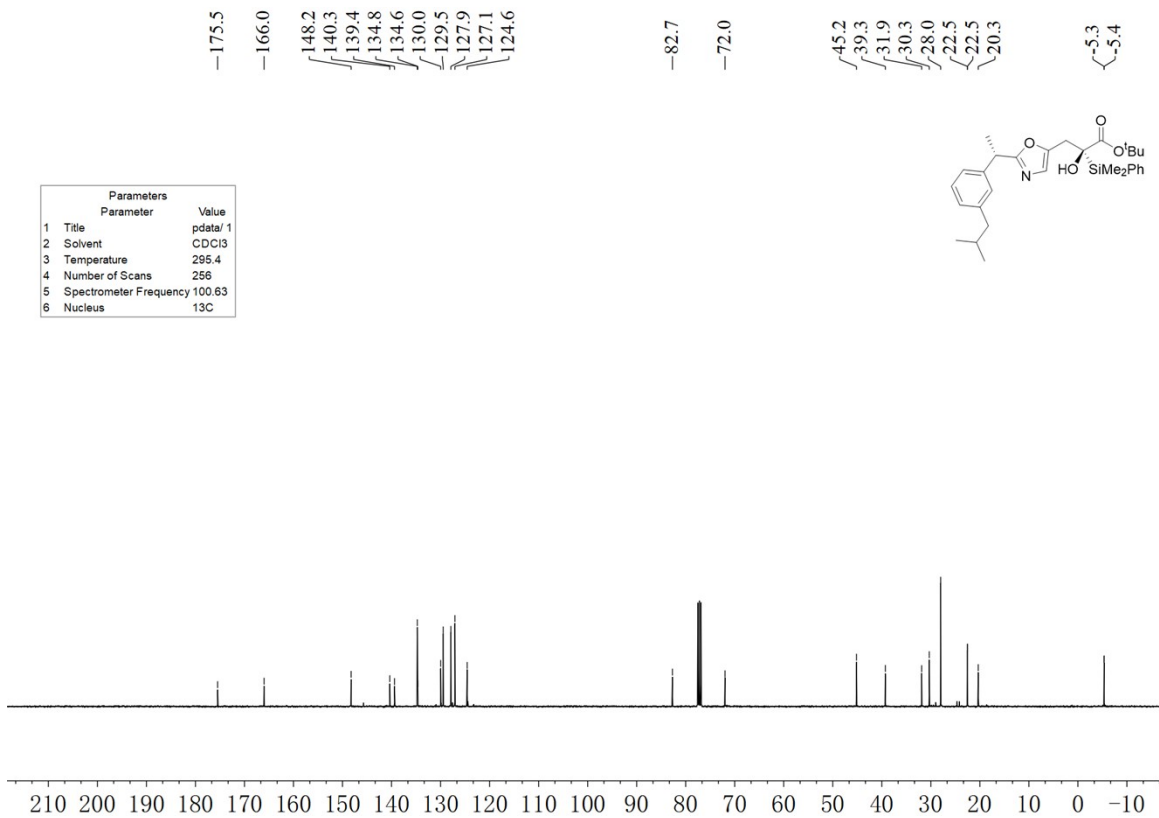

C43

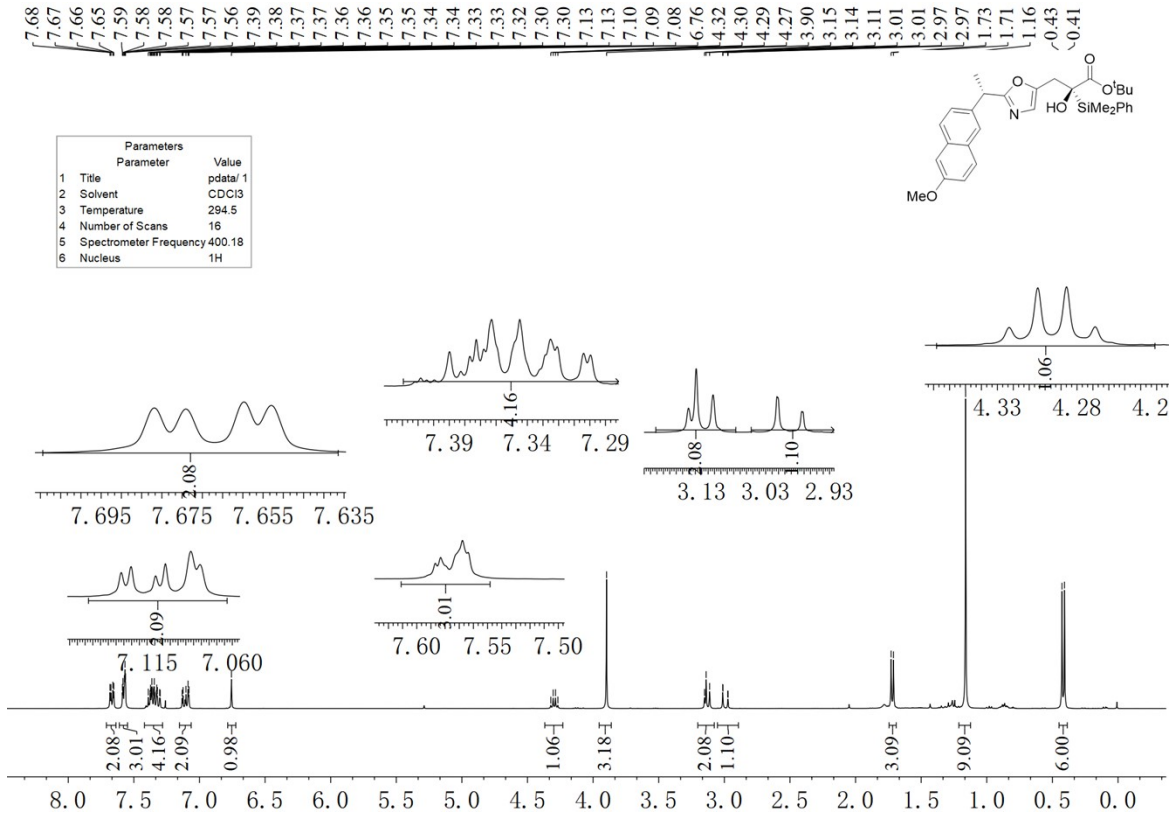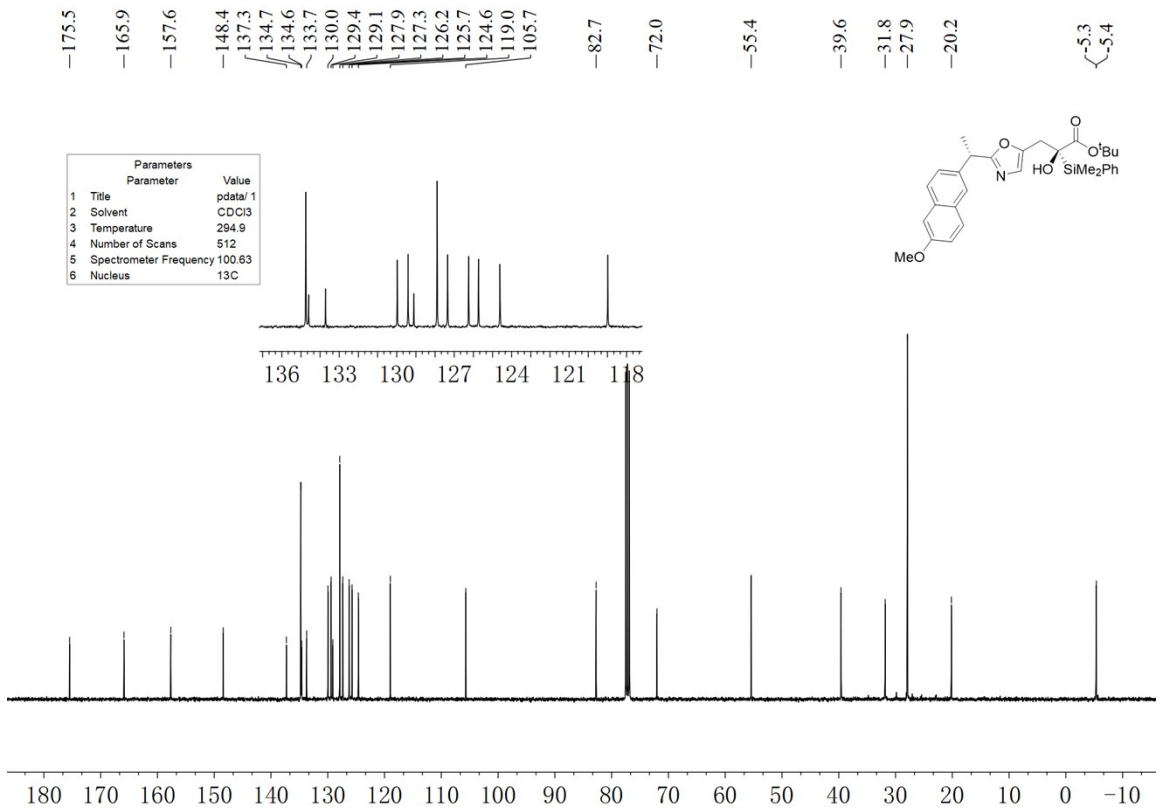

C44

7.62  
7.61  
7.60  
7.40  
7.39  
7.37  
7.00  
6.98  
6.69  
6.66  
6.64  
6.58

3.87  
3.86  
3.84  
3.18  
3.15  
3.14  
3.05  
3.01  
3.01  
2.30  
2.16  
1.83  
1.82  
1.81  
1.81  
1.80  
1.79  
1.64  
1.64  
1.63  
1.62  
1.60  
1.35  
1.31  
1.047  
0.45

| Parameters               |         |  |
|--------------------------|---------|--|
| Parameter                | Value   |  |
| 1 Title                  | pdata/1 |  |
| 2 Solvent                | CDCl3   |  |
| 3 Temperature            | 294.6   |  |
| 4 Number of Scans        | 16      |  |
| 5 Spectrometer Frequency | 400.18  |  |
| 6 Nucleus                | 1H      |  |

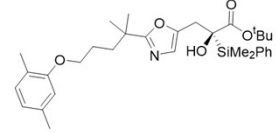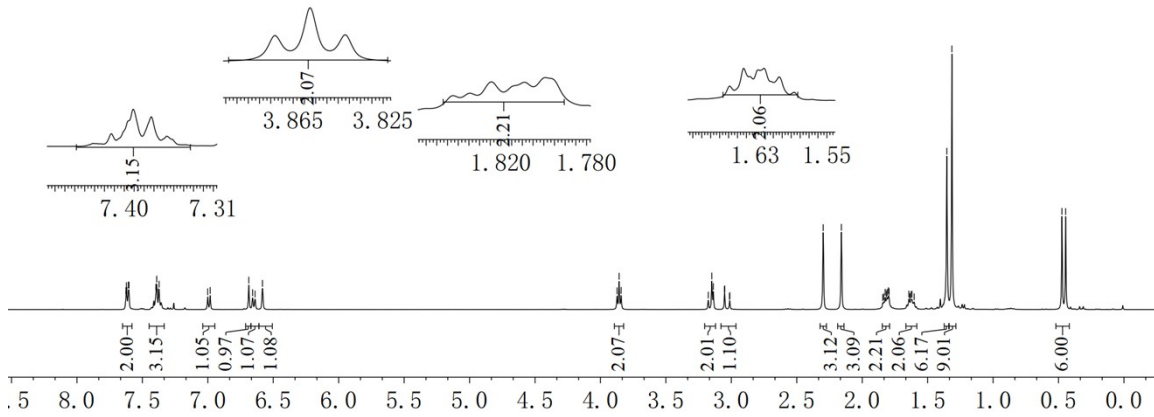

-175.7  
-169.5  
-157.1  
-148.0  
-136.6  
-134.8  
-134.7  
-130.4  
-130.0  
-127.9  
-124.2  
-123.7  
-120.7  
-112.1  
-82.7  
-72.0  
-68.0  
38.4  
36.9  
31.9  
28.1  
26.5  
26.4  
25.1  
21.6  
15.9  
-5.2  
-5.3

| Parameters               |         |  |
|--------------------------|---------|--|
| Parameter                | Value   |  |
| 1 Title                  | pdata/1 |  |
| 2 Solvent                | CDCl3   |  |
| 3 Temperature            | 295.4   |  |
| 4 Number of Scans        | 256     |  |
| 5 Spectrometer Frequency | 100.63  |  |
| 6 Nucleus                | 13C     |  |

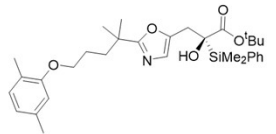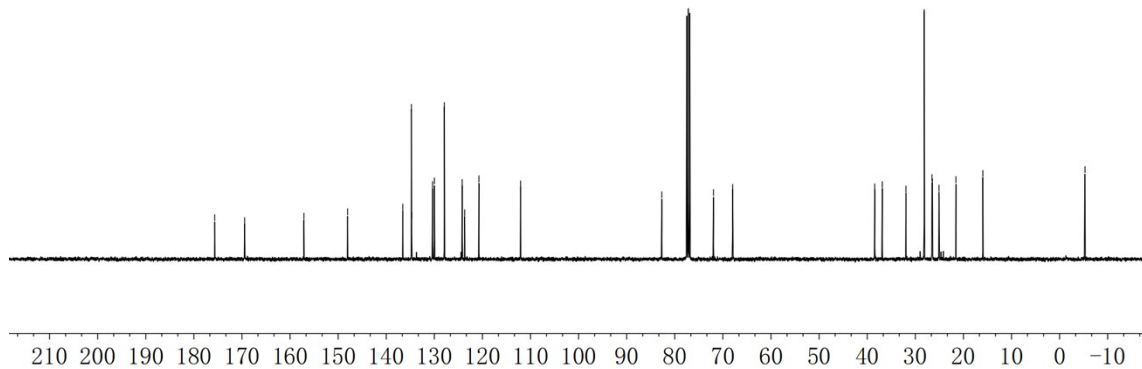

Supplement: d3sc01048a1.pdf [file d3sc01048a1.pdf]
